# Supplementary material
Source: PubMed Central journal article supplement (PMC6824594)
Supplement: NIHMS1026101-supplement-1.pdf [file NIHMS1026101-supplement-1.pdf]

In the format provided by the authors and unedited.

# Hydrogenation catalyst generates cyclic peptide stereocentres in sequence

Diane N. Le<sup>1</sup>, Eric Hansen<sup>2</sup>, Hasan A. Khan<sup>1,3</sup>, Byoungmoo Kim<sup>1,3</sup>, Olaf Wiest<sup>2,4\*</sup> and Vy M. Dong<sup>1\*</sup>

<sup>1</sup>Department of Chemistry, University of California, Irvine, CA, USA. <sup>2</sup>Department of Chemistry and Biochemistry, University of Notre Dame, Notre Dame, IN, USA. <sup>3</sup>Department of Chemistry, University of Toronto, Toronto, ON, Canada. <sup>4</sup>Lab of Computational Chemistry and Drug Design, School of Chemical Biology and Biotechnology, Peking University, Shenzhen, China. \*e-mail: [owiest@nd.edu](mailto:owiest@nd.edu); [dongv@uci.edu](mailto:dongv@uci.edu)

# Hydrogenation Catalyst Generates Cyclic Peptide Stereocenters in Sequence

Diane N. Le,<sup>1</sup> Eric Hansen,<sup>2</sup> Hasan A. Khan,<sup>1,3</sup> Byoungmoo Kim,<sup>1,3</sup> Olaf Wiest,<sup>2,4\*</sup> Vy M. Dong<sup>1\*</sup>

<sup>1</sup>Department of Chemistry, University of California, Irvine, California 92697 (USA)

<sup>2</sup>Department of Chemistry and Biochemistry, University of Notre Dame, Notre Dame, Indiana 46556 (USA)

<sup>3</sup>Department of Chemistry, University of Toronto, 80 St. George Street, Toronto, Ontario M5S 3H6 (Canada)

<sup>4</sup>Lab of Computational Chemistry and Drug Design, School of Chemical Biology and Biotechnology, Peking University, Shenzhen (China)

*\*To whom correspondence should be addressed at e-mail: dongv@uci.edu, owiest@nd.edu*

## Table of Contents

|                                                                     |    |
|---------------------------------------------------------------------|----|
| 1. General considerations.....                                      | 2  |
| 2. Typical procedures for synthesis of cyclic pentapeptides.....    | 3  |
| <i>i) Synthesis of pentapeptide 5a</i> .....                        | 3  |
| <i>ii) Synthesis of pentapeptide 5a'</i> .....                      | 9  |
| <i>iii) Synthesis of pentapeptide 5b'</i> .....                     | 12 |
| <i>iv) Synthesis of pentapeptide 5c'</i> .....                      | 13 |
| <i>v) Synthesis of pentapeptide 5d'</i> .....                       | 16 |
| <i>vi) Synthesis of pentapeptide 6a'</i> .....                      | 22 |
| <i>vii) SPPS syntheses</i> .....                                    | 25 |
| 3. General procedures for hydrogenation .....                       | 28 |
| 4. Ligand evaluation .....                                          | 35 |
| 5. NMR time trace .....                                             | 36 |
| 6. Determination of absolute stereochemistry via SFC analysis ..... | 36 |
| 7. Computational data .....                                         | 39 |
| <i>i) Transition state force field sampling</i> .....               | 39 |
| <i>ii) Example MacroModel conformational search command</i> .....   | 41 |
| <i>iii) Hydrogen bonding in diastereomeric TSs</i> .....            | 43 |
| <i>iv) Details of QM calculations</i> .....                         | 44 |

|                                |     |
|--------------------------------|-----|
| 8. Additional experiments..... | 45  |
| 9. NMR spectra .....           | 64  |
| 10. References.....            | 111 |

## 1. General considerations

Commercial reagents were purchased from Sigma Aldrich, Strem, Acros Organics, ChemImpex, TCI and/or Alfa Aesar and used without further purification. Reaction progresses were monitored using a combination of LC/MS analysis<sup>1</sup> and thin-layer chromatography (TLC) on EMD Silica Gel 60 F254 plates. Visualization of the developed plates was performed under UV light (254 nm) and with KMnO<sub>4</sub> stain. Organic solutions were concentrated under reduced pressure on a Büchi rotary evaporator. <sup>1</sup>H, <sup>13</sup>C, and <sup>19</sup>F spectra were recorded on a Bruker DRX400, Bruker DRX500, Bruker DRX500 with TCI (three channel inverse) cryoprobe or a Bruker AVANCE600 with BBFO (broadband fluorine observe) cryoprobe spectrometer. <sup>1</sup>H NMR spectra were internally referenced to the residual solvent signal or TMS. <sup>13</sup>C NMR spectra were internally referenced to the residual solvent signal. Data for <sup>1</sup>H NMR are reported as follows: chemical shift ( $\delta$  ppm), multiplicity (s = singlet, d = doublet, t = triplet, q = quartet, m = multiplet, br = broad), coupling constant (Hz), integration. Data for <sup>13</sup>C NMR are reported in terms of chemical shift ( $\delta$  ppm). High resolution mass spectra (HRMS) were obtained on a Waters LCT Premier spectrometer (using ESI-TOF). Infrared (IR) spectra were obtained on a Nicolet iS5 FT-IR spectrometer with an iD5 ATR, and are reported in terms of frequency of absorption (cm<sup>-1</sup>). Column chromatography was performed with Silicycle Silia-P Flash Silica Gel, using either glass columns or a Teledyne Isco Combiflash Rf 200 automated purification system. Preparative reverse phase HPLC (RP-HPLC) was performed on a Beckman (Agilent Zorbax 80 SB C<sub>18</sub> column, 50 x 4.6 mm; solvent A: H<sub>2</sub>O/0.1% TFA, solvent B: CH<sub>3</sub>CN/0.1% TFA). Enantiomeric excesses were determined by chiral SFC analysis using an Agilent Technologies HPLC (1200 series) system and Aurora A5 Fusion. Solvents were purchased from Fisher Chemical and were purified according to standard procedures.<sup>2</sup>

## 2. Typical procedures for synthesis of cyclic pentapeptides

### i) Synthesis of pentapeptide **5a**

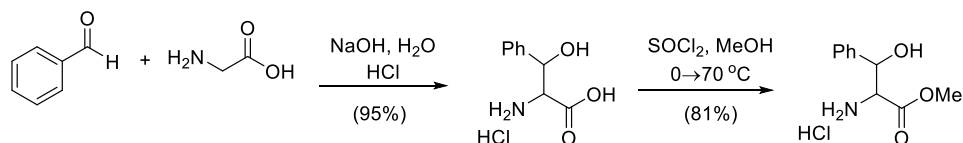

### Methyl 2-amino-3-hydroxy-3-phenylpropanoate (**S1**)

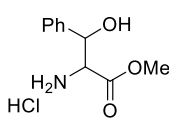

To a stirring solution of NaOH (60 g, 1.5 mol) in water (250 mL) at rt was added glycine (75 g, 1 mol). The solution was stirred for 10 min and benzaldehyde (215 mL, 2.1 mol) was added and the solution was stirred for 20 min. The solution became a beige emulsion and the solid was broken apart. Concentrated HCl (aq) (130 mL) was added slowly and the mixture stirred until the beige solid was consumed to give a clear yellow solution. Shortly, beige precipitates were observed and the mixture was cooled to 0 °C. The beige solid was collected via vacuum filtration and the solid was washed with Et<sub>2</sub>O. The solid was dried *in vacuo* to give the (±)-β-phenylserine an off-white solid (172 g, 95%). Characterization data was consistent with those previously reported.<sup>3</sup>

To a round bottom flask equipped with a stir bar was added 2-amino-3-hydroxy-3-phenylpropanoic acid (25 g, 138 mmol) and anhydrous MeOH (190 mL) under N<sub>2</sub> and the mixture was cooled to 0 °C. Thionyl chloride (22.5 mL, 310 mmol) was subsequently added and the reaction stirred overnight for 16 h at 70 °C. The reaction mixture was concentrated under reduced pressure, redissolved in DCM, and subsequently concentrated again (2x). The resulting white solid was washed with Et<sub>2</sub>O to afford DL-(β-OH)-Phe-OMe **S1** as an off-white solid (26.0 g, 81%). Characterization data was consistent with those previously reported.<sup>4</sup>

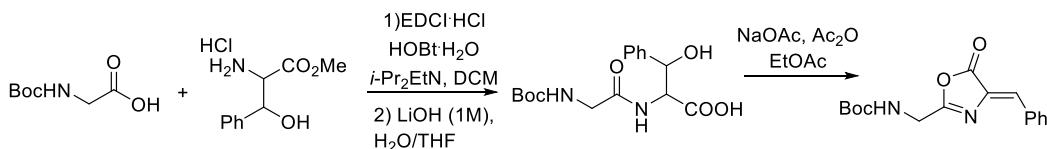

***tert*-butyl (Z)-((4-benzylidene-5-oxo-4,5-dihydrooxazol-2-yl)methyl)carbamate (1)**

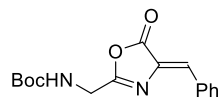

To a round bottom flask equipped with a stir bar was added Boc-Gly-OH (20 g, 114 mmol), DL-( $\beta$ -OH)-Phe-OMe **S1** (29 g, 125 mmol), HOBt·H<sub>2</sub>O (24 g, 125 mmol) and DCM (400 mL). The mixture was cooled to 0 °C and *i*-Pr<sub>2</sub>EtN (50 mL, 285 mmol) was subsequently added. EDCI·HCl (24 g, 125 mmol) was added in portions and the reaction gradually warmed to rt and stirred for 16 h. The reaction mixture was transferred to a separatory funnel and washed with sat. NaHCO<sub>3</sub> (aq), 10% KHSO<sub>4</sub> (aq), H<sub>2</sub>O, and brine. The organic phase was dried over Na<sub>2</sub>SO<sub>4</sub>, filtered, and concentrated under reduced pressure. The crude reaction mixture was purified by column chromatography (eluting with 30:70 hexanes/EtOAc) and obtained as a white solid (21 g, 53% yield). Characterization data was consistent with those previously reported.<sup>5</sup>

To a round bottom flask equipped with a stir bar was added methyl ester (17.2 g, 48.8 mmol), THF (244 mL), and H<sub>2</sub>O (185 mL). The mixture was cooled to 0 °C and 1 M LiOH (aq) (58.6 mL, 1.2 equiv) was subsequently added. The reaction gradually warmed to rt and stirred for 16 h. The reaction mixture was quenched with 10% KHSO<sub>4</sub> (aq) and the THF was concentrated under reduced pressure. The reaction mixture was transferred to a separatory funnel where it was extracted with EtOAc three times. The organic layer was washed with brine, dried over Na<sub>2</sub>SO<sub>4</sub>, filtered, and concentrated under reduced pressure to afford the desired carboxylic acid, which was used without further purification.

To a round bottom flask equipped with a stir bar was added carboxylic acid (48.8 mmol) and EtOAc (98 mL). To this solution was added acetic anhydride (46 mL, 488 mmol) and sodium acetate (7.9 g, 96.7 mmol) and the mixture was stirred at rt for 16 h. Sat. NaHCO<sub>3</sub> (aq) was added to quench excess acetic anhydride and acetic acid until the reaction mixture stopped bubbling. The mixture was extracted 3x with EtOAc and the combined organic layer was washed with brine and dried over anhydrous Na<sub>2</sub>SO<sub>4</sub>. The solution was filtered and solvent was evaporated under reduced pressure to afford the product as a light yellow solid (11.5 g, 79% over two steps). Characterization data was consistent with those previously reported.<sup>6</sup>

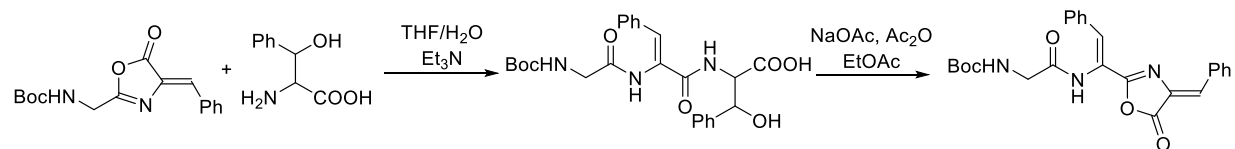

***tert*-butyl(2-(((*Z*)-1-(4-((*Z*)-benzylidene)-5-oxo-4,5-dihydrooxazol-2-yl)-2-phenylvinyl)amino)-2-oxoethyl)carbamate (**3**)**

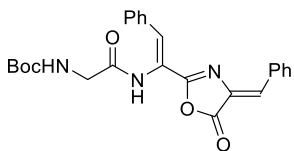

To a solution of ( $\pm$ )- $\beta$ -phenylserine (7.41 g, 40.88 mmol) in THF/H<sub>2</sub>O (1:1, 0.1 M) was added triethylamine (5.7 mL, 40.88 mmol) and the mixture was sonicated until homogeneous. The mixture was added to a solution of oxazolone **1** (10.3 g, 34.07 mmol) in THF (340 mL). The reaction was stirred at rt for 15 h. The mixture was acidified with 10% KHSO<sub>4</sub> (aq), extracted with 3x with EtOAc, and the organic layer was washed with brine. The organic layer was dried over anhydrous Na<sub>2</sub>SO<sub>4</sub> and concentrated under reduced pressure to afford the desired carboxylic acid which was used without further purification.

To a round bottom flask equipped with a stir bar was added the carboxylic acid (34.07 mmol) and EtOAc (68 mL). To this solution was added acetic anhydride (32 mL, 340.7 mmol) and sodium acetate (5.60 g, 68.14 mmol) and the mixture was stirred at rt for 24 h. Sat. NaHCO<sub>3</sub> (aq) was added to quench excess acetic anhydride and acetic acid until the reaction mixture stopped bubbling. The mixture was extracted 3x with EtOAc and the combined organic layer was washed with brine and dried over anhydrous Na<sub>2</sub>SO<sub>4</sub>. The solution was filtered and solvent was evaporated under reduced pressure. The oil was dissolved in a minimal amount of DCM and hexanes was added to precipitate the oxazolone **3**. The solvent was decanted and the solid was washed 2x with hexanes to afford the product as a yellow solid (12.5 g, 82% over two steps). <sup>1</sup>H NMR (400 MHz, DMSO)  $\delta$  9.78 (s, 1H), 8.31 – 8.19 (m, 2H), 7.92 – 7.76 (m, 2H), 7.56 – 7.50 (m, 4H), 7.49 – 7.39 (m, 3H), 7.33 (s, 1H), 7.19 (t, *J* = 5.8 Hz, 1H), 3.82 (d, *J* = 6.0 Hz, 2H), 1.41 (s, 9H). <sup>13</sup>C NMR (125 MHz, CDCl<sub>3</sub>)  $\delta$  169.0, 167.1, 162.1, 156.5, 135.3, 133.5, 133.4, 133.0, 132.7, 132.5, 131.5, 130.4, 129.1, 128.9, 119.7, 110.1, 80.9, 45.2, 28.4. IR (ATR): 3268, 1784, 1689, 1650 cm<sup>-1</sup>. HRMS (ESI-TOF) *m/z* calc'd for C<sub>25</sub>H<sub>26</sub>N<sub>3</sub>O<sub>5</sub> [M+H]<sup>+</sup>: 448.1866, found 448.1851.

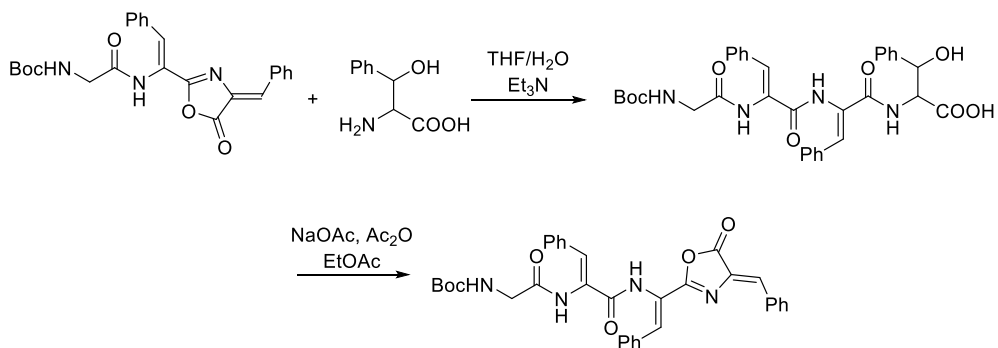

***tert*-butyl (2-(((*Z*)-3-(((*Z*)-1-(4-((*Z*)-benzylidene)-5-oxo-4,5-dihydrooxazol-2-yl)-2-phenylvinyl)amino)-3-oxo-1-phenylprop-1-en-2-yl)amino)-2-oxoethyl)carbamate (S2)**

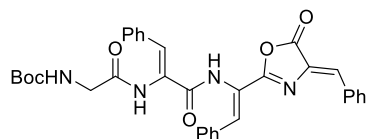

To a solution of ( $\pm$ )- $\beta$ -phenylserine (6.0 g, 33.25 mmol) in THF/H<sub>2</sub>O (1:1, 0.1 M) was added triethylamine (4.6 mL, 33.25 mmol) and the mixture was sonicated until homogeneous. The mixture was added to a solution of oxazolonone **3** (12.4 g, 27.7 mmol) in THF (270 mL). The reaction was stirred at rt for 21 h. The mixture was acidified with 10% KHSO<sub>4</sub> (aq), extracted with 3x with EtOAc, and the organic layer was washed with brine. The organic layer was dried over anhydrous Na<sub>2</sub>SO<sub>4</sub> and concentrated under reduced pressure to afford the desired carboxylic acid which was used without further purification.

To a round bottom flask equipped with a stir bar was added the carboxylic acid (27.7 mmol) and EtOAc (55 mL). To this solution was added acetic anhydride (26 mL, 277 mmol) and sodium acetate (4.5 g, 55.4 mmol) and the mixture was stirred at rt for 16 h. Sat. NaHCO<sub>3</sub> (aq) was added to quench excess acetic anhydride and acetic acid until the reaction mixture stopped bubbling. The mixture was extracted 3x with EtOAc and the combined organic layer was washed with brine and dried over anhydrous Na<sub>2</sub>SO<sub>4</sub>. The solution was filtered and solvent was evaporated under reduced pressure. The oil was dissolved in a minimal amount of DCM and hexanes was added to precipitate the oxazolonone. The solvent was decanted and the solid was washed 2x with hexanes to afford the product as a yellow solid (12.0 g, 73% over two steps). <sup>1</sup>H NMR (499 MHz, DMSO)  $\delta$  9.85 (s, 1H), 9.80 (s, 1H), 8.28 (d, *J* = 7.0 Hz, 2H), 7.92 (d, *J* = 5.0 Hz, 2H), 7.69 (d, *J* = 7.4 Hz, 2H), 7.58 (s, 1H), 7.53 – 7.36 (m, 9H), 7.35 (s, 1H), 7.27 (s, 1H), 7.11 (t, *J* = 5.7 Hz, 1H), 3.80 (d, *J* = 5.8 Hz, 2H), 1.38 (s, 9H). <sup>13</sup>C NMR (126 MHz, DMSO)  $\delta$  169.9, 166.7, 165.5, 162.4, 156.1, 135.0, 133.7, 133.3, 133.3, 133.0, 132.5, 131.3, 131.0, 130.9, 130.2, 129.9, 129.4, 129.3, 129.1, 128.9, 128.7, 128.6, 128.3, 121.9, 78.2, 43.6, 28.2.

IR (ATR): 3372, 3237, 2989, 1806, 1778, 1686, 1660  $\text{cm}^{-1}$ . HRMS (ESI-TOF)  $m/z$  calc'd for  $\text{C}_{34}\text{H}_{33}\text{N}_4\text{O}_6$   $[\text{M}+\text{H}]^+$ : 593.2394, found 593.2368.

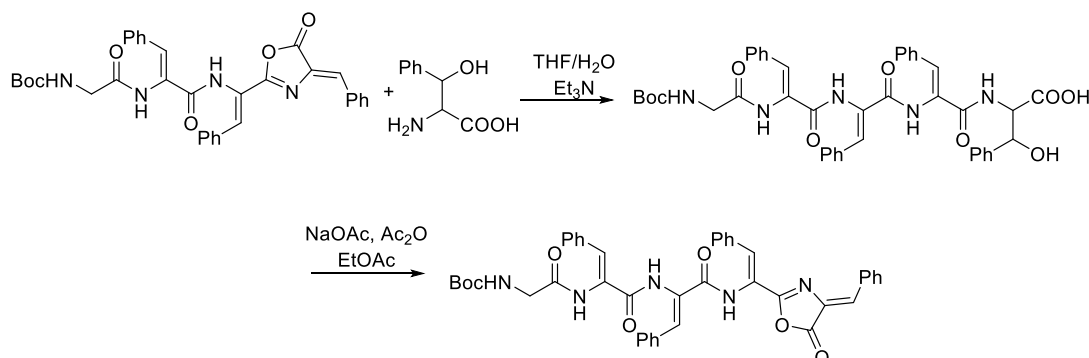

***tert*-butyl (2-(((*Z*)-3-(((*Z*)-3-(((*Z*)-1-(4-((*Z*)-benzylidene)-5-oxo-4,5-dihydrooxazol-2-yl)-2-phenylvinyl)amino)-3-oxo-1-phenylprop-1-en-2-yl)amino)-3-oxo-1-phenylprop-1-en-2-yl)amino)-2-oxoethyl)carbamate (4)**

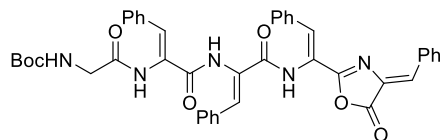

To a solution of (+)- $\beta$ -phenylserine (114 mg, 0.628 mmol) in THF/ $\text{H}_2\text{O}$  (1:1, 0.1 M) was added triethylamine (88  $\mu\text{L}$ , 0.628 mmol) and the mixture was sonicated until homogeneous. The mixture was added to a solution of oxazolone **S2** (310 mg, 0.523 mmol) in THF (10 mL). The reaction was stirred at rt for 15 h. The mixture was acidified with 10%  $\text{KHSO}_4$  (aq), extracted with 3x with EtOAc, and the organic layer was washed with brine. The organic layer was dried over anhydrous  $\text{Na}_2\text{SO}_4$  and concentrated under reduced pressure to afford the desired carboxylic acid which was used without further purification.

To a round bottom flask equipped with a stir bar was added the carboxylic acid (0.523 mmol) and EtOAc (1 mL). To this solution was added acetic anhydride (0.5 mL, 5.23 mmol) and sodium acetate (86 mg, 1.05 mmol) and the mixture was stirred at rt for 26 h. Sat.  $\text{NaHCO}_3$  (aq) was added to quench excess acetic anhydride and acetic acid until the reaction mixture stopped bubbling. The mixture was extracted 3x with EtOAc and the combined organic layer was washed with brine and dried over anhydrous  $\text{Na}_2\text{SO}_4$ . The solution was filtered and solvent was evaporated under reduced pressure. The oil was dissolved in a minimal amount of DCM and hexanes was added to precipitate the oxazolone. The solvent was decanted and the solid was washed 2x with hexanes to afford the product as a yellow solid (343 mg, 89% over two steps).  $^1\text{H}$  NMR (600 MHz,  $\text{DMF-}d_7$ )  $\delta$  10.09 (s, 1H), 9.89 (s, 1H), 9.68 (s, 1H), 8.39-8.40 (m, 2H), 8.05 (d,  $J$  = 7.4 Hz, 1H), 7.77 (d,  $J$  = 7.5 Hz,

1H), 7.74 (d,  $J = 7.4$  Hz, 1H), 7.68 (s, 1H), 7.49-7.56 (m, 4H), 7.39-7.48 (m, 9H), 7.35 (s, 1H), 6.93 (br, 1H), 3.96 (d,  $J = 5.4$  Hz, 1H), 1.35 (s, 9H).  $^{13}\text{C}$  NMR (125 MHz,  $\text{CDCl}_3$ )  $\delta$  170.8, 167.8, 164.9, 164.5, 162.6, 156.9, 135.1, 134.6, 133.7, 133.6, 133.1, 132.8, 131.7, 131.2, 131.1, 130.3, 130.1, 129.9, 129.7, 129.6, 129.5, 129.2, 129.0, 128.8, 128.7, 128.6, 127.7, 127.3, 120.7, 81.6, 45.2, 28.3. IR (ATR): 3253, 1779, 1670, 1640  $\text{cm}^{-1}$ . HRMS (ESI-TOF)  $m/z$  calc'd for  $\text{C}_{43}\text{H}_{40}\text{N}_5\text{O}_7$   $[\text{M}+\text{H}]^+$ : 738.2922, found 738.2886.

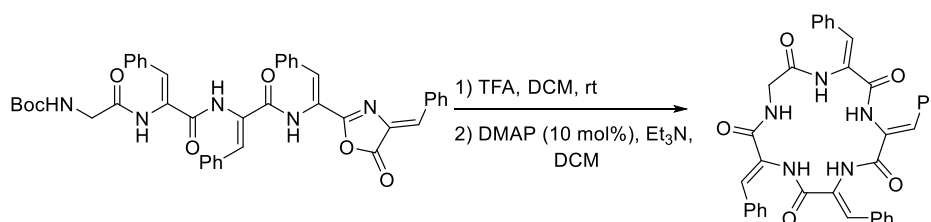

**3,6,9,12-tetra((Z)-benzylidene)-1,4,7,10,13-pentaazacyclopentadecane-2,5,8,11,14-pentaone  
(1')**

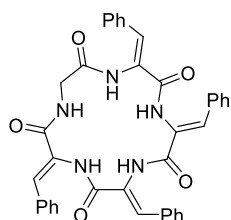

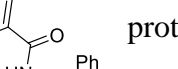

To a round bottom flask equipped with a stir bar under N<sub>2</sub> was added Boc-protected amine **4** (346 mg, 0.469 mmol) and anhydrous DCM (5.9 mL). The reaction mixture was cooled to 0 °C and TFA (0.897 mL, 11.7 mmol) was slowly added. The reaction slowly warmed to rt and stirred for 2 h. The DCM was concentrated under reduced pressure and to the mixture was added toluene to form a TFA azeotrope, which was subsequently concentrated under reduced pressure. The crude reaction mixture was further dried on the high vacuum and subsequently triturated with Et<sub>2</sub>O to afford TFA·amine salt and was immediately used in the next reaction without further purification.

TFA·amine salt (0.469 mmol) was dissolved in anhydrous DCM (4.69 mL, 0.1 M) and to this yellow solution was added anhydrous Et<sub>3</sub>N (0.131 mL, 0.938 mmol) and DMAP (5.7 mg, 0.0469 mmol). The reaction mixture was stirred at rt for 30 min. The solution was then diluted by addition of 150 mL of DCM. The organic phase was washed four times with 10 mL 1 M HCl. The organic phase was then dried with Na<sub>2</sub>SO<sub>4</sub> and concentrated under reduced pressure to afford a light yellow solid. This solid was then triturated with Et<sub>2</sub>O to afford cyclic pentapeptide **5a** as a light yellow solid (243 mg, 81% over 2 steps). <sup>1</sup>H NMR (499 MHz, DMSO, 373K, d1=5 s) δ 9.63 (s, 1H), 9.38 (s, 1H), 9.34 (s, 1H), 9.23 (s, 1H), 8.05 (t, *J* = 4.4 Hz, 1H), 7.63 – 7.52 (m, 8H), 7.46 – 7.32 (m,

12H), 7.28 (s, 1H), 7.20 (s, 1H), 7.16 (s, 1H), 7.08 (s, 1H), 4.00 (d,  $J = 5.4$  Hz, 2H).  $^{13}\text{C}$  NMR (151 MHz, DMSO, 373 K,  $d_1=25$  s)  $\delta$  169.1, 165.4, 165.3, 164.8, 164.0, 133.9, 133.8, 133.5, 133.3, 131.8, 131.7, 129.3, 129.1, 129.0, 128.9, 128.7, 128.5, 128.44, 128.42, 128.40, 128.3, 128.2, 128.08, 128.06, 127.98, 127.96, 127.82, 127.79, 127.7, 127.40, 43.36. IR (ATR): 3272, 3050, 2927, 1634, 1500, 1490, 1447, 1363, 1256, 1203, 1075, 1029, 1001, 929  $\text{cm}^{-1}$ . HRMS (ESI-TOF)  $m/z$  calc'd for  $\text{C}_{38}\text{H}_{31}\text{N}_5\text{O}_5$   $[\text{M}+\text{H}]^+$ : 638.2397, found 638.2379.

ii) *Synthesis of pentapeptide 5a'*

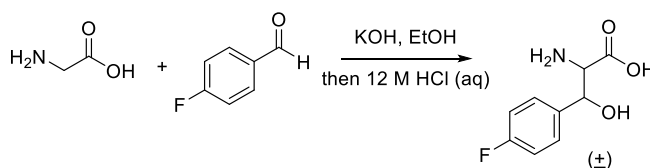

**2-amino-3-(4-fluorophenyl)-3-hydroxypropanoic acid (S3)**

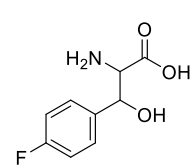

To a 250 mL Erlenmeyer flask equipped with a stir bar was added EtOH (200 mL) and KOH (5.6 g, 100 mmol) and this mixture was stirred at rt until complete dissolution of the KOH was observed. Glycine (3.75 g, 50 mmol) was then added, and this mixture was again stirred until homogeneous. 4-fluorobenzaldehyde (10.7 mL, 100 mmol) was then added with stirring. After 2-4 h of stirring at rt, precipitate formed until the entire reaction mixture became a white solid. This solid was then broken up mechanically and 9 mL of 12 M HCl (aq.) was added with stirring. Any remaining large clumps were crushed using a glass rod. The precipitate was filtered off, and the filtrate was concentrated under reduced pressure. To the crude concentrate was added 50 mL of DCM and 80 mL of  $\text{H}_2\text{O}$ . The phases were separated and the aqueous phase was washed twice more with dichloromethane (2 x 50 mL) then concentrated under reduced pressure. The crude solid was then triturated with  $\text{Et}_2\text{O}$  to afford (±) fluoroserine **S3** derivative as a white solid (1.5 g, 17%).  $^1\text{H}$  NMR (600 MHz, DMSO)  $\delta$  7.40 (dd,  $J = 8.6, 5.7$  Hz, 2H), 7.13 (t,  $J = 8.9$  Hz, 2H), 5.04 (d,  $J = 4.3$  Hz, 1H), 3.39 (d,  $J = 4.4$  Hz, 1H).  $^{13}\text{C}$  NMR (151 MHz, DMSO)  $\delta$  168.7, 161.5 (d,  $J = 242.1$  Hz), 138.4 (d,  $J = 2.8$  Hz), 128.5 (d,  $J = 8.2$  Hz), 114.7 (d,  $J = 21.2$  Hz), 70.3, 59.3.  $^{19}\text{F}$  NMR (376 MHz, DMSO)  $\delta$  -116.36. IR (ATR): 3133, 2915, 1635, 1596, 1506, 1484, 1221  $\text{cm}^{-1}$ . HRMS (ESI-TOF)  $m/z$  calc'd for  $\text{C}_9\text{H}_{10}\text{FNO}_3\text{Na}$   $[\text{M}+\text{Na}]^+$ : 222.0542, found: 222.0542.

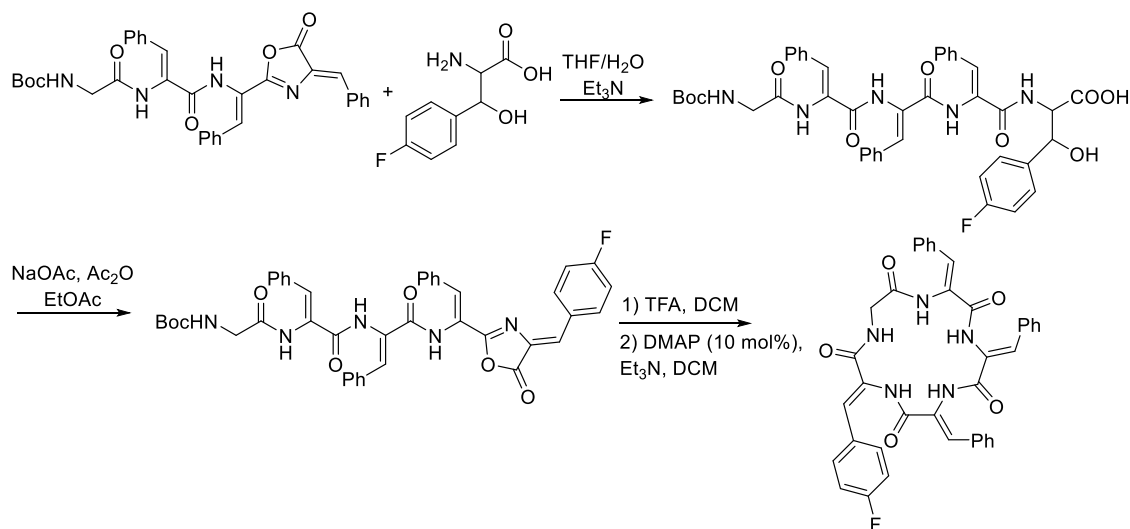

**6,9,12-tri((Z)-benzylidene)-3-((Z)-4-fluorobenzylidene)-1,4,7,10,13-pentaazacyclopentadecane-2,5,8,11,14-pentaone (5a')<sup>a</sup>**

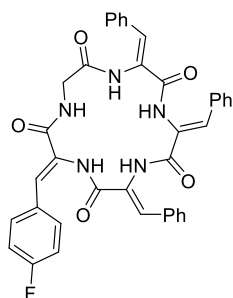

To a solution of fluoroserine **S3** (806 mg, 4.05 mmol) in THF/H<sub>2</sub>O (1:1, 0.1 M) was added triethylamine (564  $\mu$ L, 4.05 mmol) and the mixture was sonicated until homogeneous. The mixture was added to a solution of oxazolone **S2** (2.00 g, 3.37 mmol) in THF (34 mL). The reaction was stirred at rt for 15 h. The mixture was acidified with 10% KHSO<sub>4</sub> (aq), extracted with 3x with EtOAc, and the organic layer was washed with brine. The organic layer was dried over anhydrous Na<sub>2</sub>SO<sub>4</sub> and concentrated under reduced pressure to afford the desired carboxylic acid which was used without further purification. To a round bottom flask equipped with a stir bar was added the carboxylic acid (3.37 mmol) and EtOAc (6.7 mL). To this solution was added acetic anhydride (3.18 mL, 33.7 mmol) and sodium acetate (552 mg, 6.74 mmol) and the mixture was stirred at rt for 26 h. Sat. NaHCO<sub>3</sub> (aq) was added to quench excess acetic anhydride and acetic acid until the reaction mixture stopped bubbling. The mixture was extracted 3x with EtOAc and the combined organic layer was washed with brine and dried over anhydrous Na<sub>2</sub>SO<sub>4</sub>. The solution was filtered and solvent was evaporated under reduced pressure. The oil was dissolved in a minimal amount of DCM and hexanes was

<sup>a</sup> The difference in the yield to obtain cyclic peptide **5a'** and **5a** is due to the number of isolations in the overall reaction sequence. The macrocyclization yield of **5a'** is 12% over 4 steps from oxazolone **S2**. This had to be completed over 4 steps due to difficulty in the isolation of pentapeptide intermediate (Boc-Gly- $\Delta$ Phe- $\Delta$ Phe- $\Delta$ Phe- $\Delta$ Phe-(4-F)<sub>ox</sub>). In comparison, macrocyclization yield of **5a** is 81% yield over 2 steps from oxazolone **4**.

added to precipitate the oxazolone. The solvent was decanted and the solid was washed 2x with hexanes to afford the desired oxazolone which was used in the next step without further purification.

To a round bottom flask equipped with a stir bar under N<sub>2</sub> was added the resulting oxazolone (3.37 mmol) and anhydrous DCM (34 mL). The reaction mixture was cooled to 0 °C and TFA (5.20 mL, 67.4 mmol) was slowly added. The reaction slowly warmed to rt and stirred for 2 h. The DCM was concentrated under reduced pressure and to the mixture was added toluene to form a TFA azeotrope, which was subsequently concentrated under reduced pressure. The crude reaction mixture was further dried on the high vacuum and subsequently triturated with Et<sub>2</sub>O to afford TFA·amine salt and was immediately used in the next reaction without further purification.

TFA·amine salt (3.37 mmol) was dissolved in anhydrous DCM (67 mL, 0.05 M) and to this solution was added anhydrous Et<sub>3</sub>N (0.94 mL, 6.74 mmol) and DMAP (41 mg, 0.34 mmol). The reaction mixture was stirred at rt for 3 h and subsequently concentrated under reduced pressure. The crude reaction mixture was then purified via column chromatography (eluting with 25% DCM/Acetone) to afford cyclic pentapeptide **5a'** as a light yellow solid (235 mg, 12% yield over 4 steps). <sup>1</sup>H NMR (499 MHz, DMSO, 373 K, d1=25 s) δ 9.65 (s, 1H), 9.40 (s, 1H), 9.35 (s, 1H), 9.22 (s, 1H), 8.09 (s, 1H), 7.71 – 7.53 (m, 7H), 7.49 – 7.31 (m, 10H), 7.27 (s, 1H), 7.25 – 7.15 (m, 4H), 7.09 (s, 1H), 4.00 (d, *J* = 5.4 Hz, 2H). <sup>13</sup>C NMR (151 MHz, DMSO, 373 K, d1=25 s) δ 169.1, 165.3, 165.3, 164.8, 163.9, 161.6 (d, *J* = 247.5 Hz), 133.8, 133.5, 133.3, 131.2 (d, *J* = 8.3 Hz), 130.5 (d, *J* = 3.1 Hz), 129.5, 129.4, 129.4, 129.3, 129.2, 129.1, 128.7, 128.5, 128.4, 128.4, 128.4, 128.3, 127.99, 127.97, 127.8, 127.4, 127.4, 114.7 (d, *J* = 21.6 Hz), 43.4. <sup>19</sup>F NMR (376 MHz, DMSO, 298 K) δ -112.20. <sup>19</sup>F NMR (376 MHz, DMSO, 373 K) δ -112.34. IR (ATR): 3050, 1633, 1601, 1509, 1233, 1203 cm<sup>-1</sup>. HRMS (ESI-TOF) *m/z* calc'd for C<sub>38</sub>H<sub>30</sub>FN<sub>5</sub>O<sub>5</sub>Na [M+Na]<sup>+</sup>: 678.2129, found: 678.2134.

iii) Synthesis of pentapeptide **5b'**

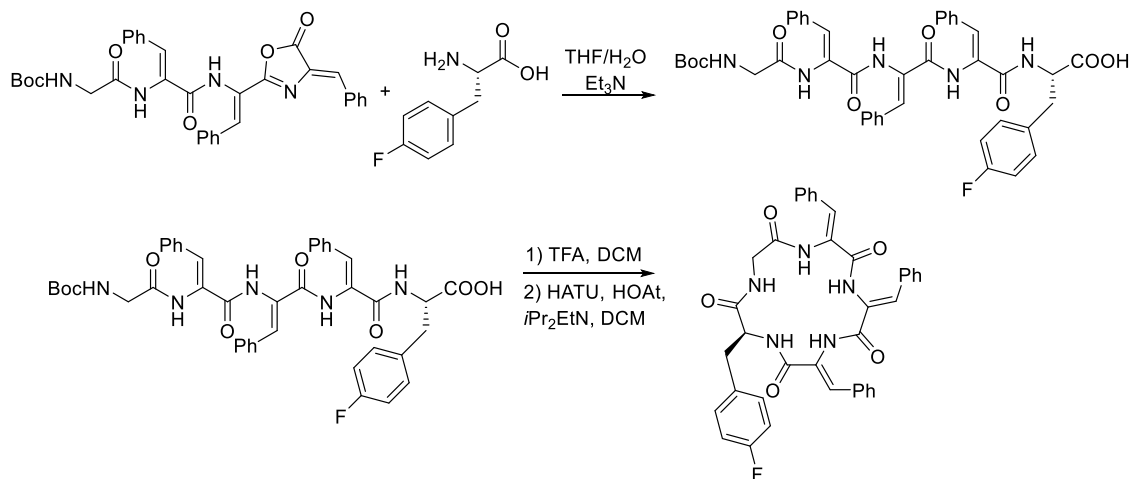

**(S)-6,9,12-tri((Z)-benzylidene)-3-(4-fluorobenzyl)-1,4,7,10,13-pentaazacyclopentadecane-2,5,8,11,14-pentaone (5b')**

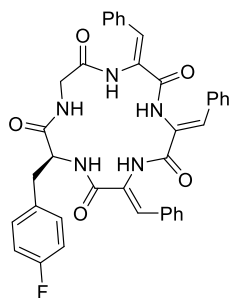

To a solution of L-Phe(4-F)-OH (0.602 g, 3.29 mmol) in THF/H<sub>2</sub>O (1:1, 0.1 M) was added Et<sub>3</sub>N (459  $\mu$ L, 3.29 mmol) and the mixture was sonicated until homogeneous. The mixture was added to a solution of oxazolone **S2** (1.50 g, 2.53 mmol) in THF (25 mL). The reaction was stirred at rt for 11 h. The mixture was acidified with 10% KHSO<sub>4</sub> (aq), extracted with 3x with EtOAc, and the organic layer was washed with brine. The organic layer was dried over anhydrous Na<sub>2</sub>SO<sub>4</sub> and concentrated under reduced pressure to afford the desired carboxylic acid which was used in the next step without further purification.

To a round bottom flask equipped with a stir bar under N<sub>2</sub> was added the carboxylic acid (2.53 mmol) and anhydrous DCM (32 mL). The reaction mixture was cooled to 0 °C and TFA (2.9 mL, 38.0 mmol) was slowly added. The reaction slowly warmed to rt and stirred for 22 h. The DCM was concentrated under reduced pressure and to the mixture was added toluene to form a TFA azeotrope, which was subsequently concentrated under reduced pressure. The crude reaction mixture was further dried on the high vacuum and subsequently triturated with Et<sub>2</sub>O to afford TFA·amine salt and was immediately used in the next reaction without further purification. To a round bottom flask equipped with a stir bar was added the TFA·amine salt (2.53 mmol), HOAt (0.688 g, 5.06 mmol), and anhydrous DCM (51 mL, 0.05 M). The reaction mixture was cooled to 0 °C and *i*-Pr<sub>2</sub>EtN (2.2 mL, 12.7 mmol) was added. HATU (2.40 g, 6.33 mmol) was

added in portions and the reaction warmed to rt and stirred for 4 h. The solvent was removed under reduced pressure and the product was purified by column chromatography (eluting with hexanes/EtOAc) to afford the product as a yellow solid (365 mg, 22% over 3 steps).  $^1\text{H}$  NMR (499 MHz, DMSO, 368 K)  $\delta$  9.56 (s, 1H), 9.35 (s, 1H), 9.25 (s, 1H), 8.05 (s, 1H), 7.83 (d,  $J$  = 8.1 Hz, 1H), 7.63 – 7.52 (m, 5H), 7.47 – 7.29 (m, 12H), 7.20 (s, 1H), 7.18 (s, 1H), 7.15 (s, 1H), 7.07 (t,  $J$  = 8.8 Hz, 2H), 4.71 – 4.63 (m, 1H), 4.20 (dd,  $J$  = 14.9, 7.1 Hz, 1H), 3.59 (dd,  $J$  = 14.9, 4.5 Hz, 1H), 3.21 (dd,  $J$  = 13.9, 7.2 Hz, 1H), 3.00 – 2.96 (m, 1H).  $^{13}\text{C}$  NMR (126 MHz, DMSO, 368 K,  $d_1=10$  s)  $\delta$  171.0, 169.2, 165.0, 164.9, 163.6, 160.6 (d,  $J$  = 242.0 Hz), 133.8, 133.6 (d,  $J$  = 3.6 Hz), 133.6, 133.4, 130.3 (d,  $J$  = 7.9 Hz), 129.2, 129.1, 129.06, 129.01, 128.9, 128.4, 128.3, 128.1, 128.0, 127.9, 127.9, 127.9, 127.8, 127.7, 127.4, 114.2 (d,  $J$  = 21.1 Hz), 54.8, 43.1, 35.5.  $^{19}\text{F}$  NMR (376 MHz, DMSO)  $\delta$  -117.00. IR (ATR): 3055, 3027, 2910, 1652, 1640, 1501, 1221  $\text{cm}^{-1}$ . HRMS (ESI-TOF)  $m/z$  calc'd for  $\text{C}_{38}\text{H}_{32}\text{FN}_5\text{O}_5\text{Na}$   $[\text{M}+\text{Na}]^+$ : 680.2285, found: 680.2289.  $[\alpha]^{25}_{\text{D}} +175$  ( $c$  = 0.25,  $\text{CHCl}_3$ ).

iv) Synthesis of pentapeptide **5c'**

**methyl (S)-2-((R)-2-((tert-butoxycarbonyl)amino)-3-phenylpropanamido)-3-(4-fluorophenyl)propanoate (S4)**

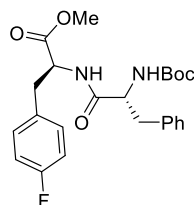

To a round bottom flask equipped with a stir bar was added Boc-D-Phe-OH (2.00 g, 7.50 mmol), 4-fluoro-L-Phe-OMe (1.90 g, 8.25 mmol), HOBT·H<sub>2</sub>O (1.50 g, 9.00 mmol), and DCM (94 mL). The mixture was cooled to 0 °C and *i*-Pr<sub>2</sub>EtN (4.00 mL, 22.5 mmol) was subsequently added. EDCI·HCl (1.73 g, 9.00 mmol) was added in portions and the reaction gradually warmed to rt and stirred for 22 h. The reaction mixture was transferred to a separatory funnel and was washed with sat. NaHCO<sub>3</sub> (aq), 10% KHSO<sub>4</sub> (aq), and brine. The organic phase was dried over Na<sub>2</sub>SO<sub>4</sub>, filtered, and concentrated under reduced pressure. The unpurified reaction mixture was then purified by column chromatography (eluting with 7:3 hexanes/EtOAc) to afford dipeptide **S4** as a white solid (3.1 g, 94%).  $^1\text{H}$  NMR (600 MHz, CDCl<sub>3</sub>)  $\delta$  7.30 (t,  $J$  = 7.3 Hz, 2H), 7.25 – 7.23 (m, 1H), 7.20 – 7.17 (m, 2H), 6.97 – 6.83 (m, 4H), 6.39 (br s, 1H), 4.89 (br s, 1H), 4.86 – 4.76 (m, 1H), 4.36 (br s, 1H), 3.67 (s, 3H), 3.08 (dd,  $J$  = 13.8, 7.1 Hz, 1H), 3.00 (dd,  $J$  = 14.0, 5.5 Hz, 2H), 2.92 (dd,  $J$  = 14.0, 5.8 Hz, 1H), 1.38 (s, 9H).  $^{13}\text{C}$  NMR (126 MHz, CDCl<sub>3</sub>)  $\delta$  171.5, 171.0, 162.1 (d,  $J$  = 245.3 Hz), 155.5, 136.7, 131.4 (d,  $J$  = 2.9 Hz), 130.8 (d,  $J$  = 7.6 Hz), 129.5, 128.9, 127.2, 115.6 (d,  $J$  = 21.2 Hz), 80.5, 55.9, 53.2, 52.5,

38.3, 37.2, 28.4.  $^{19}\text{F}$  NMR (376 MHz,  $\text{CDCl}_3$ )  $\delta$  -116.04. IR (ATR): 3044, 2972, 1741, 1674, 1657, 1517, 1232, 1160  $\text{cm}^{-1}$ . HRMS (ESI-TOF)  $m/z$  calc'd for  $\text{C}_{24}\text{H}_{29}\text{FN}_2\text{O}_5\text{Na}$   $[\text{M}+\text{Na}]^+$ : 467.1958, found: 467.1953.  $[\alpha]^{26}_{\text{D}} -13$  ( $c = 0.24$ ,  $\text{CHCl}_3$ ).

**(S)-2-((R)-2-amino-3-phenylpropanamido)-3-(4-fluorophenyl)propanoic acid (S5)**

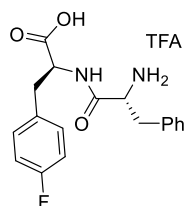

To a round bottom flask equipped with a stir bar was added methyl ester **S4** (1.5 g, 3.4 mmol), THF (16 mL), and  $\text{H}_2\text{O}$  (13 mL). The mixture was cooled to 0 °C and 1 M LiOH (aq) (6.1 mL, 6.1 mmol) was subsequently added. The reaction gradually warmed to rt and stirred for 23 h. The reaction mixture was acidified with 10%  $\text{KHSO}_4$  (aq), and the THF was concentrated under reduced pressure. The reaction mixture was transferred to a separatory funnel where it was extracted with EtOAc (3 x 100 mL). The organic layer was washed with 100 mL brine, dried over  $\text{Na}_2\text{SO}_4$ , filtered, and concentrated under reduced pressure to afford the desired carboxylic acid which was used in the next step without further purification.

To a round bottom flask equipped with a stir bar was added the resulting carboxylic acid (3.4 mmol), triisopropylsilane (0.70 mL, 3.4 mmol), and DCM (42 mL). The reaction mixture was cooled to 0 °C and TFA (3.8 mL, 5.1 mmol) was slowly added. The reaction slowly warmed to rt and stirred for 24 h. The DCM was concentrated under reduced pressure and to the mixture was added toluene to form a TFA azeotrope, which was subsequently concentrated under reduced pressure. The reaction mixture was further dried on the high vacuum and subsequently triturated with  $\text{Et}_2\text{O}$  to afford amine **S5** as a white solid (1.5 g, 99%).  $^1\text{H}$  NMR (400 MHz, DMSO)  $\delta$  8.92 (d,  $J = 7.7$  Hz, 1H), 8.14 (br s, 2H), 7.33 – 7.17 (m, 5H), 7.10 (t,  $J = 8.9$  Hz, 2H), 7.04 – 6.98 (m, 2H), 4.54 (td,  $J = 9.1, 4.8$  Hz, 1H), 4.12 – 3.98 (m, 1H), 3.06 (dd,  $J = 13.8, 4.7$  Hz, 1H), 2.90 (dd,  $J = 14.0, 5.0$  Hz, 1H), 2.82 (dd,  $J = 13.8, 9.6$  Hz, 1H), 2.69 (dd,  $J = 13.9, 7.9$  Hz, 1H).  $^{13}\text{C}$  NMR (126 MHz, DMSO)  $\delta$  172.3, 167.9, 161.2 (d,  $J = 242.3$  Hz), 134.6, 133.3 (d,  $J = 2.8$  Hz), 131.2 (d,  $J = 8.0$  Hz), 129.5, 128.5, 127.2, 115.0 (d,  $J = 21.1$  Hz), 53.6, 53.2, 37.0, 36.3.  $^{19}\text{F}$  NMR (376 MHz,  $\text{CDCl}_3$ )  $\delta$  -116.84. IR (ATR): 3055, 2949, 1730, 1685, 1506, 1199, 1182, 1148  $\text{cm}^{-1}$ . HRMS (ESI-TOF)  $m/z$  calc'd for  $\text{C}_{18}\text{H}_{19}\text{FN}_2\text{O}_3\text{Na}$   $[\text{M}+\text{Na}]^+$ : 353.1277, found: 353.1268.  $[\alpha]^{25}_{\text{D}} +3$  ( $c = 0.29$ , MeOH).

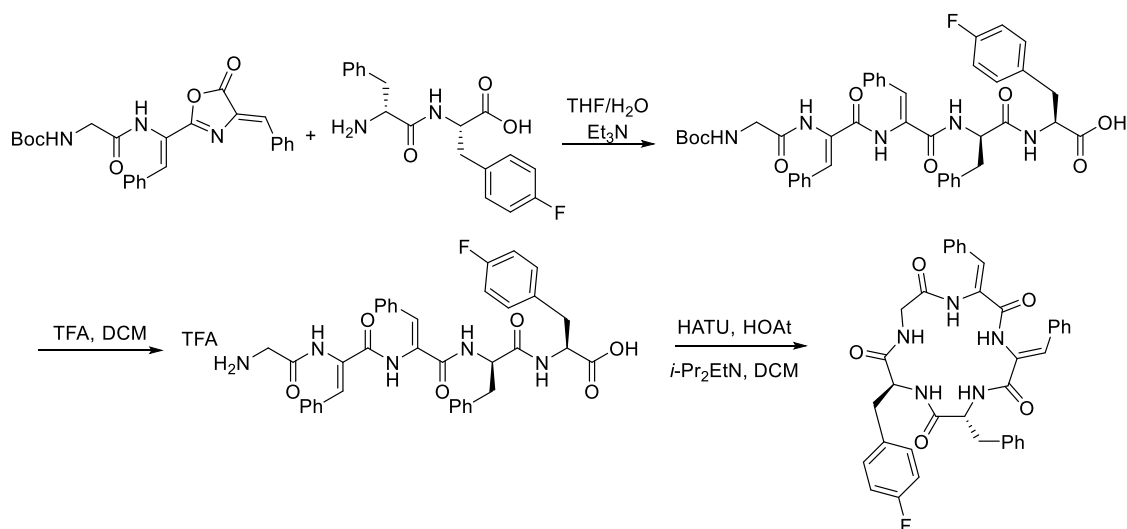

**(3*S*,6*R*)-6-benzyl-9,12-di((*Z*)-benzylidene)-3-(4-fluorobenzyl)-1,4,7,10,13-pentaazacyclopentadecane-2,5,8,11,14-pentaone** **(5c')**

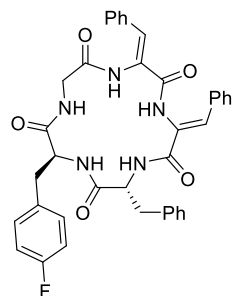

To a solution of dipeptide **S5** (764 mg, 1.72 mmol) in THF/H<sub>2</sub>O (1:1, 0.1 M) was added Et<sub>3</sub>N (240  $\mu$ L, 4.05 mmol) and the mixture was sonicated until homogeneous. The mixture was added to a solution of oxazolone **3** (700 mg, 1.56 mmol) in THF (16 mL). The reaction was stirred at rt for 15 h. The mixture was acidified with 10% KHSO<sub>4</sub> (aq), extracted with 3x with EtOAc, and the organic layer was washed with brine. The organic layer was dried over anhydrous Na<sub>2</sub>SO<sub>4</sub> and concentrated under reduced pressure to afford the desired carboxylic acid which was used in the next step without further purification.

To a round bottom flask equipped with a stir bar under N<sub>2</sub> was added the resulting carboxylic acid (1.56 mmol) and anhydrous DCM (20 mL). The reaction mixture was cooled to 0 °C and TFA (1.8 mL, 23.4 mmol) was slowly added. The reaction slowly warmed to rt and stirred for 2 h. The DCM was concentrated under reduced pressure and to the mixture was added toluene to form a TFA azeotrope, which was subsequently concentrated under reduced pressure. The crude reaction mixture was further dried on the high vacuum and subsequently triturated with Et<sub>2</sub>O to afford TFA·amine salt and was immediately used in the next reaction without further purification. To a round bottom flask equipped with a stir bar was added the corresponding TFA·amine salt (1.56 mmol), HOAt (0.212 g, 1.56 mmol), and DMF (31 mL, 0.05 M). The reaction mixture was cooled to 0 °C and *i*-Pr<sub>2</sub>EtN (0.679 mL, 3.90 mmol) was added. HATU (711 mg, 1.87 mmol) was added in portions and the reaction warmed to rt and stirred for 24 h. The solvent was removed

under reduced pressure and the product was purified by column chromatography (eluting with 1:4 hexanes/EtOAc) to afford the product as a white solid (167 mg, 16% over 3 steps).  $^1\text{H}$  NMR (400 MHz, DMSO, 330 K)  $\delta$  9.85 (s, 1H), 9.44 (s, 1H), 8.33 (d,  $J$  = 6.9 Hz, 1H), 7.84 (d,  $J$  = 5.5 Hz, 1H), 7.82 – 7.74 (m, 1H), 7.65 – 7.50 (m, 4H), 7.47 – 7.27 (m, 7H), 7.25 – 7.06 (m,  $J$  = 22.5, 6.2 Hz, 8H), 7.01 (t,  $J$  = 8.8 Hz, 2H), 6.86 (s, 1H), 4.62 – 4.47 (m, 2H), 4.19 (dd,  $J$  = 16.7, 6.4 Hz, 1H), 3.75 (dd,  $J$  = 16.2, 4.5 Hz, 1H), 3.12 – 3.06 (m, 1H), 3.01 (dd,  $J$  = 14.1, 5.6 Hz, 1H), 2.86 (dd,  $J$  = 13.5, 5.0 Hz, 1H), 2.79 (dd,  $J$  = 14.3, 9.1 Hz, 1H).  $^{13}\text{C}$  NMR (151 MHz, DMSO, 368 K, d1=10 s)  $\delta$  171.4, 170.2, 169.6, 164.4, 163.9, 160.5, (d,  $J$  = 242.1 Hz), 137.6, 133.9, 133.5 (d,  $J$  = 2.9 Hz), 133.3, 130.1 (d,  $J$  = 7.9 Hz), 130.0, 129.04, 128.94, 128.84, 128.4, 128.20, 128.18, 128.0, 127.8, 127.7, 127.5, 126.4, 125.5, 114.2 (d,  $J$  = 21.1 Hz), 54.7, 54.2, 42.1, 36.4, 34.2.  $^{19}\text{F}$  NMR (376 MHz, DMSO)  $\delta$  -117.19. IR (ATR): 3050, 2910, 1657, 1646, 1545, 1506, 1221  $\text{cm}^{-1}$ . HRMS (ESI-TOF)  $m/z$  calc'd for  $\text{C}_{38}\text{H}_{34}\text{N}_5\text{O}_5\text{Na} [\text{M}+\text{Na}]^+$ : 682.2441, found: 682.2449.  $[\alpha]^{26}_{\text{D}} +202$  ( $c$  = 0.25, DMF).

v) *Synthesis of pentapeptide 5d'*

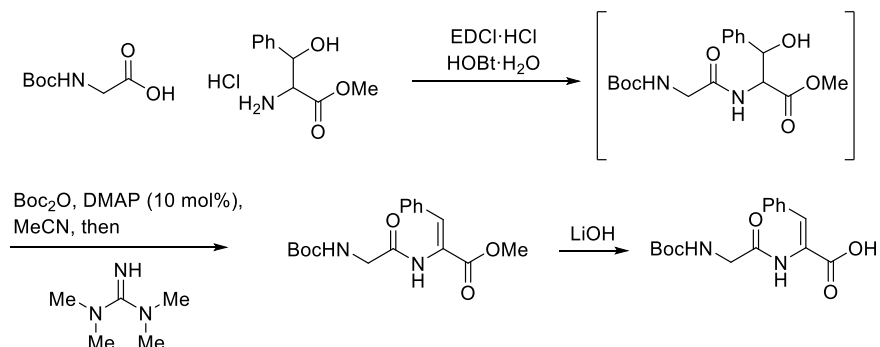

**methyl (Z)-2-(2-((*tert*-butoxycarbonyl)amino)acetamido)-3-phenylacrylate (S6)**

To a round bottom flask equipped with a stir bar was added Boc-Gly-OH (3.00 g, 17.1 mmol), DL-( $\beta$ -OH)-Phe-OMe (4.20 g, 18.0 mmol), HOBT·H<sub>2</sub>O (3.50 g, 20.5 mmol), and DCM (214 mL). The mixture was cooled to 0 °C and *i*-Pr<sub>2</sub>EtN (8.90 mL, 51.3 mmol) was subsequently added. EDCI·HCl (3.93 g, 20.5 mmol) was added in portions and the reaction gradually warmed to rt and stirred for 22 h. The reaction mixture was transferred to a separatory funnel and was washed with sat. NaHCO<sub>3</sub> (aq), 10% KHSO<sub>4</sub> (aq), and brine. The organic phase was dried over Na<sub>2</sub>SO<sub>4</sub>, filtered, and concentrated under reduced pressure to afford the corresponding dipeptide which was used in the next step without further purification.

The procedure was adapted from Suárez.<sup>7</sup> To a round bottom flask equipped with a stir bar was added the corresponding dipeptide (17.1 mmol), DMAP (209 mg, 1.71 mmol) and MeCN (52 mL). The mixture was cooled to 0 °C and Boc<sub>2</sub>O (3.91 g, 18.0 mmol) was quickly added. After disappearance of starting material analyzed via LC-MS, tetramethylguanidine (2.1 mL, 17.1 mmol) was added. After 12 h, the reaction mixture was concentrated under reduced pressure and then purified by column chromatography (eluting with 3:2 hexanes/EtOAc) to afford the unsaturated dipeptide **S6** as a white solid (1.83 g, 32%, 2 steps). <sup>1</sup>H NMR (400 MHz, CDCl<sub>3</sub>) δ 7.74 (s, 1H), 7.57 – 7.28 (m, 6H), 5.25 (s, 1H), 3.92 (s, 2H), 3.83 (s, 3H), 1.44 (s, 9H). <sup>13</sup>C NMR (126 MHz, CDCl<sub>3</sub>) δ 168.54, 165.59, 156.30, 133.54, 133.26, 129.91, 129.76, 128.81, 123.66, 80.65, 52.87, 44.90, 28.42. IR (ATR): 3066, 2988, 1718, 1652, 1545, 1529, 1255, 1165 cm<sup>-1</sup>. HRMS (ESI-TOF) *m/z* calc'd for C<sub>17</sub>H<sub>22</sub>N<sub>2</sub>O<sub>5</sub>Na [M+Na]<sup>+</sup>: 357.1426, found: 357.1422

**(Z)-2-(2-((*tert*-butoxycarbonyl)amino)acetamido)-3-phenylacrylic acid (**S7**)**

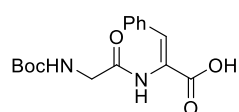

To a round bottom flask equipped with a stir bar was added methyl ester **S6** (1.82 g, 5.44 mmol), THF (26 mL), and H<sub>2</sub>O (21 mL). The mixture was cooled to 0 °C and 1 M LiOH (aq) (8.2 mL, 8.2 mmol) was subsequently added. The reaction gradually warmed to rt and stirred for 13 h. The reaction mixture was acidified with 10% KHSO<sub>4</sub> (aq), and the THF was concentrated under reduced pressure. The reaction mixture was transferred to a separatory funnel where it was extracted with EtOAc (3 x 100 mL). The organic layer was washed with 100 mL brine, dried over Na<sub>2</sub>SO<sub>4</sub>, filtered, and concentrated under reduced pressure to afford carboxylic acid **S7** as a pale yellow oil (1.6 g, 92%). <sup>1</sup>H NMR (400 MHz, DMSO) δ 12.70 (s, 1H), 9.42 (s, 1H), 7.71 – 7.53 (m, 2H), 7.42 – 7.34 (m, 3H), 7.27 (s, 1H), 7.06 (br t, *J* = 5.8 Hz, 1H), 3.69 (d, *J* = 6.0 Hz, 2H), 1.40 (s, 9H). <sup>13</sup>C NMR (126 MHz, DMSO) δ 169.3, 166.3, 155.9, 133.6, 131.7, 130.1, 129.2, 128.5, 126.5, 78.1, 43.3, 28.2. IR (ATR): 3256, 3021, 2982, 1705, 1666, 1634, 1510, 1403, 1271, 1263, 1153 cm<sup>-1</sup>. HRMS (ESI-TOF) *m/z* calc'd for C<sub>16</sub>H<sub>20</sub>N<sub>2</sub>O<sub>5</sub>Na [M+Na]<sup>+</sup>: 343.1270, found: 343.1277

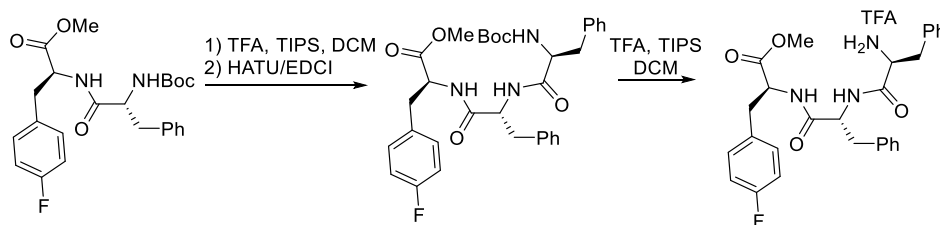

**Methyl (6*S*,9*R*,12*S*)-6,9-dibenzyl-12-(4-fluorobenzyl)-2,2-dimethyl-4,7,10-trioxo-3-oxa-5,8,11-triazatridecan-13-oate (S8)**

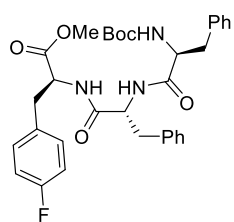

To a round bottom flask equipped with a stir bar was added the Boc-protected dipeptide **S4** (3.5 g, 7.9 mmol), triisopropylsilane (1.62 mL, 7.9 mmol), and DCM (98 mL). The reaction mixture was cooled to 0 °C and TFA (7.7 mL, 101 mmol) was slowly added. The reaction slowly warmed to rt and stirred for 24 h. The DCM was concentrated under reduced pressure and to the mixture was added toluene to form a TFA azeotrope, which was subsequently concentrated under reduced pressure to afford the TFA·amine salt which was used in the next step without further purification. To a round bottom flask equipped with a stir bar was added the TFA·amine salt (7.9 mmol), Boc-L-Phe-OH (2.1 g, 7.9 mmol), HOBt·H<sub>2</sub>O (1.6 g, 9.5 mmol), and DCM (100 mL). The mixture was cooled to 0 °C and *i*-Pr<sub>2</sub>EtN (10.3 mL, 59.3 mmol) was subsequently added. EDCI·HCl (1.8 g, 9.5 mmol) was added in portions and the reaction gradually warmed to rt and stirred for 17 h. The reaction mixture was transferred to a separatory funnel and was washed with sat. NaHCO<sub>3</sub> (aq), 10% KHSO<sub>4</sub> (aq), and brine. The organic phase was dried over Na<sub>2</sub>SO<sub>4</sub>, filtered, and concentrated under reduced pressure. The crude reaction mixture was purified via column chromatography (eluting with 55:45 hexanes/EtOAc) to afford tripeptide **S8** as a white solid (4.8 g, >99%). <sup>1</sup>H NMR (400 MHz, CDCl<sub>3</sub>) δ 7.37 – 7.20 (m, 7H), 7.16 – 7.11 (m, 2H), 7.02 – 6.82 (m, 6H), 6.64 (s, 1H), 6.24 (s, 1H), 5.03 – 4.95 (m, 1H), 4.79 – 4.66 (m, 1H), 4.67 – 4.55 (m, 1H), 4.21 – 4.12 (m, 1H), 3.63 (s, 3H), 3.05 – 2.86 (m, 5H), 2.83 – 2.71 (m, 1H), 1.38 (s, 9H). <sup>13</sup>C NMR (126 MHz, CDCl<sub>3</sub>) δ 171.4, 171.3, 170.2, δ 162.1 (d, *J* = 245.5 Hz), 155.59, 155.57, 136.6, 136.2, 131.6 (d, *J* = 1.7 Hz), 130.9 (d, *J* = 7.9 Hz), 129.6, 129.4, 128.89, 128.83, 127.3, 115.5 (d, *J* = 21.3 Hz), 80.6, 56.7, 54.0, 53.6, 52.4, 38.3, 37.4, 37.2, 28.4. <sup>19</sup>F NMR (376 MHz, CDCl<sub>3</sub>) δ -116.04. IR (ATR): 3033, 2915, 1758, 1724, 1629, 1489, 1221, 1160 cm<sup>-1</sup>. HRMS (ESI-TOF) *m/z* calc'd for C<sub>33</sub>H<sub>38</sub>FN<sub>3</sub>O<sub>6</sub>Na [M+Na]<sup>+</sup>: 614.2642, found: 614.2623. [α]<sub>D</sub><sup>23</sup> +38 (*c* = 0.29, CHCl<sub>3</sub>).

**Methyl (S)-2-((R)-2-((S)-2-amino-3-phenylpropanamido)-3-phenylpropanamido)-3-(4-fluorophenyl)propanoate (S9)**

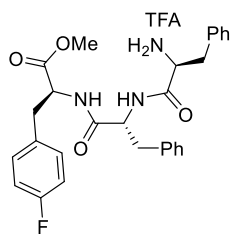

To a round bottom flask equipped with a stir bar was added tripeptide **S8** (3.0 g, 5.1 mmol), triisopropylsilane (1.0 mL, 5.1 mmol), and DCM (98 mL). The reaction mixture was cooled to 0 °C and TFA (5.7 mL, 76.5 mmol) was slowly added. The reaction slowly warmed to rt and stirred for 42 h. The DCM was concentrated under reduced pressure and to the mixture was added toluene to

form a TFA azeotrope, which was subsequently concentrated under reduced pressure and triturated with Et<sub>2</sub>O to afford tripeptide **S9** as a pale yellow solid (3.3g, >99%). <sup>1</sup>H NMR (600 MHz, DMSO) δ 8.89 – 8.86 (d, *J* = 8.3 Hz, 1H), 8.84 (d, *J* = 8.8 Hz, 1H), 8.00 (br s, 2H), 7.34 – 7.28 (m, 2H), 7.25 – 7.19 (m, 5H), 7.19 – 7.14 (m, 1H), 7.14 – 7.07 (m, 4H), 6.95 – 6.87 (m, 2H), 4.71 (m, 1H), 4.54 (m, 1H), 4.00 (br s, 1H), 3.64 (s, 3H), 3.09 (dd, *J* = 13.8, 5.0 Hz, 1H), 2.85 (dd, *J* = 13.7, 10.1 Hz, 1H), 2.78 (dd, *J* = 14.1, 4.5 Hz, 1H), 2.69 (dd, *J* = 13.5, 4.0 Hz, 1H), 2.53 (d, *J* = 14.4, 8.2 Hz, 1H), 2.46 (dd, *J* = 13.6, 10.4 Hz, 1H). <sup>13</sup>C NMR (151 MHz, DMSO) δ 171.8, 170.7, 167.7, 161.2 (d, *J* = 242.3 Hz), 137.3, 134.6, 133.2 (d, *J* = 2.9 Hz), 131.2 (d, *J* = 8.1 Hz), 129.5, 129.4, 128.4, 128.1, 127.1, 126.6, 115.0 (d, *J* = 21.1 Hz), 53.8, 53.4, 53.2, 52.1, 38.4, 36.9, 36.2. <sup>19</sup>F NMR (376 MHz, DMSO) δ -116.62. IR (ATR): 3061, 2932, 1741, 1652, 1512, 1143 cm<sup>-1</sup>. HRMS (ESI-TOF) *m/z* calc'd for C<sub>28</sub>H<sub>30</sub>FN<sub>3</sub>O<sub>4</sub>H [M+H]<sup>+</sup>: 492.2299, found: 492.2282. [α]<sub>D</sub><sup>26</sup> +3 (*c* = 0.35, MeOH).

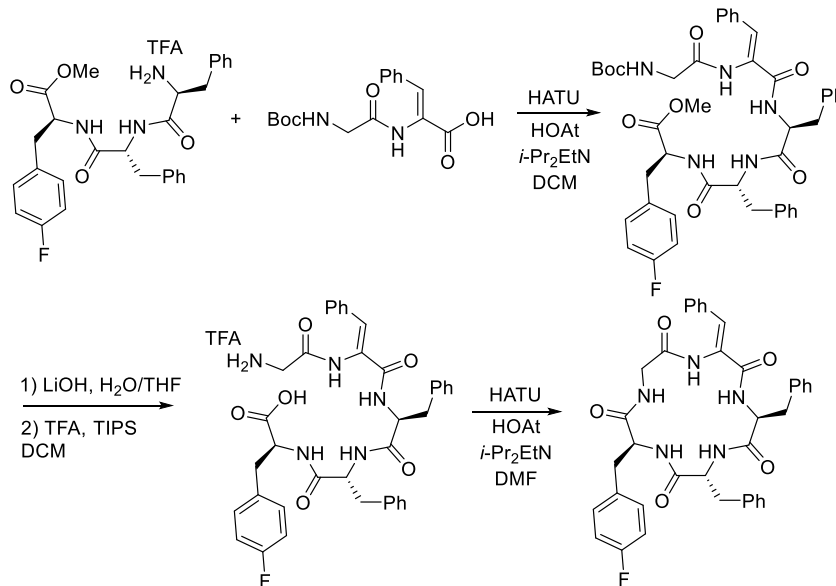

**Methyl (12*S*,15*R*,18*S*)-12,15-dibenzyl-9-((*Z*)-benzylidene)-18-(4-fluorobenzyl)-2,2-dimethyl-4,7,10,13,16-pentaoxo-3-oxa-5,8,11,14,17-pentaazanonadecan-19-oate (S10)**

To a round bottom flask equipped with a stir bar was added the dipeptide **S7** (1.6 g, 5.0 mmol), tripeptide **S9** (3.0 g, 5.0 mmol), HOAt (681 mg, 5.0 mmol), and DCM (63 mL). The reaction mixture was cooled to 0 °C and *i*-Pr<sub>2</sub>EtN (4.4 mL, 25 mmol) was added. HATU (2.3 g, 6.0 mmol) was added in portions and the reaction warmed to rt and stirred for 14 h. The reaction mixture was transferred to a separatory funnel and was washed with sat. NaHCO<sub>3</sub> (aq), 10% KHSO<sub>4</sub> (aq), and brine. The organic phase was dried over Na<sub>2</sub>SO<sub>4</sub>, filtered, and

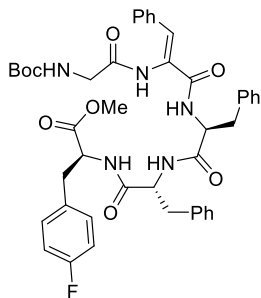

concentrated under reduced pressure. The crude reaction mixture was purified via column chromatography (eluting with 1:1 hexanes/EtOAc) to afford pentapeptide **S10** as a pale yellow solid (3.3 g, 83%). <sup>1</sup>H NMR (400 MHz, DMSO) δ 9.59 (s, 1H), 8.58 (d, *J* = 8.1 Hz, 1H), 8.20 (d, *J* = 8.7 Hz, 1H), 7.97 (d, *J* = 8.1 Hz, 1H), 7.52 (d, *J* = 7.3 Hz, 2H), 7.40 – 7.03 (m, 17H), 7.01 (br t, *J* = 5.8 Hz, 1H), 6.87 (s, 1H), 4.60 – 4.49 (m, 2H), 4.49 – 4.38 (m, 1H), 3.81 – 3.67 (m, *J* = 5.2 Hz, 2H), 3.33 (s, 3H), 3.07 (dd, *J* = 13.7, 5.1 Hz, 1H), 2.90 (dd, *J* = 13.7, 9.7 Hz, 1H), 2.86 – 2.57 (m, 4H), 1.36 (s, 9H). <sup>13</sup>C NMR (126 MHz, DMSO) δ 171.8, 171.2, 170.5, 169.8, 164.9, 161.1 (d, *J* = 242.2 Hz), 156.0, 138.0, 137.8, 133.8, 133.2 (d, *J* = 2.8 Hz), 131.2 (d, *J* = 8.0 Hz), 129.6, 129.3, 129.2, 128.9, 128.7, 128.5, 128.0, 127.8, 126.3, 126.1, 114.9 (d, *J* = 21.1 Hz), 78.2, 54.6, 54.0, 53.5, 52.0, 43.6, 37.9, 36.9, 36.1, 28.2. <sup>19</sup>F NMR (376 MHz, DMSO) δ -116.89. IR (ATR): 3055, 2966, 1663, 1506, 1216, 1165 cm<sup>-1</sup>. HRMS (ESI-TOF) *m/z* calc'd for C<sub>44</sub>H<sub>48</sub>FN<sub>5</sub>O<sub>8</sub>Na [M+Na]<sup>+</sup>: 816.3384, found: 816.3364. [α]<sub>D</sub><sup>24</sup> +98 (*c* = 0.19, CHCl<sub>3</sub>).

**(2*S*,5*R*,8*S*)-14-amino-5,8-dibenzyl-11-((*Z*)-benzylidene)-2-(4-fluorobenzyl)-4,7,10,13-tetraoxo-3,6,9,12-tetraazatetradecanoic acid (S11)**

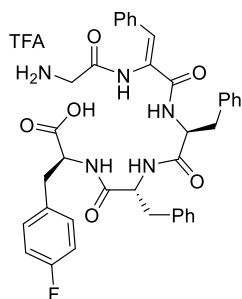

To a round bottom flask equipped with a stir bar was added pentapeptide **S10** (710 mg, 0.93 mmol), THF (4.4 mL), and H<sub>2</sub>O (3.6 mL). The mixture was cooled to 0 °C and 1 M LiOH (aq) (1.9 mL, 1.9 mmol) was subsequently added. The reaction gradually warmed to rt and stirred for 39 h. The reaction mixture was acidified with 10% KHSO<sub>4</sub> (aq), and the THF was concentrated under reduced pressure. The reaction mixture was transferred to a separatory funnel where it was extracted with DCM (3 x 30 mL). The organic layer was washed with 50 mL

brine, dried over Na<sub>2</sub>SO<sub>4</sub>, filtered, and concentrated under reduced pressure to afford the desired carboxylic acid which was then used in the next step without further purification.

To a round bottom flask equipped with a stir bar was added the pentapeptide carboxylic acid (670 mg, 0.86 mmol), triisopropylsilane (0.18 mL, 0.86 mmol), and DCM (11 mL). The reaction mixture was cooled to 0 °C and TFA (1.0 mL, 12.9 mmol) was slowly added. The reaction slowly warmed to rt and stirred for 49 h. The DCM was concentrated under reduced pressure and to the mixture was added toluene to form a TFA azeotrope, which was subsequently concentrated under reduced pressure and triturated with Et<sub>2</sub>O to afford pentapeptide **S11** as white solid (839 mg, >99%). <sup>1</sup>H NMR (600 MHz, DMSO) δ 9.47 (br s, 2H), 8.50 (d, *J* = 7.6 Hz, 1H), 8.20 (d, *J* = 8.6 Hz, 1H), 8.15 (d, *J* = 8.2 Hz, 1H), 7.50 (d, *J* = 7.4 Hz, 2H), 7.39 (t, *J* = 7.4 Hz, 2H), 7.36 – 7.31 (m, 1H), 7.30 – 7.02 (m, 15H), 6.90 (s, 1H), 4.63 – 4.57 (m, 1H), 4.57 – 4.49 (m, 1H), 4.49 – 4.41 (m, 1H), 3.84 – 3.72 (m, 2H), 3.11 (dd, *J* = 13.6, 4.1 Hz, 1H), 2.85 (dd, *J* = 13.5, 9.8 Hz, 1H), 2.81 (dd, *J* = 13.5, 3.0 Hz, 1H), 2.77 – 2.71 (m, 1H), 2.62 (dd, *J* = 13.4, 10.5 Hz, 1H), 2.57 (dd, *J* = 12.8, 11.4 Hz, 1H). <sup>13</sup>C NMR (151 MHz, DMSO) δ 173.0, 171.0, 170.5, 166.5, 164.4, 161.1 (d, *J* = 241.8 Hz), 138.1, 137.8, 133.9 (d, *J* = 2.4 Hz), 133.6, 131.2 (d, *J* = 8.0 Hz), 129.6, 129.3, 129.2, 128.9, 128.7, 128.2, 128.2, 128.00, 127.98, 126.3, 126.2, 114.8 (d, *J* = 21.0 Hz), 54.4, 53.8, 53.7, 40.7, 38.0, 37.1, 36.5. <sup>19</sup>F NMR (376 MHz, DMSO) δ -116.99. IR (ATR): 3027, 2932, 1668, 1624, 1534, 1523, 1199, 1132 cm<sup>-1</sup>. HRMS (ESI-TOF) *m/z* calc'd for C<sub>38</sub>H<sub>38</sub>FN<sub>5</sub>O<sub>6</sub>Na [M+Na]<sup>+</sup>: 702.2704, found: 702.2684. [α]<sub>D</sub><sup>26</sup> +114 (*c* = 0.47, MeOH).

**(3*S*,6*R*,9*S*)-6,9-dibenzyl-12-((*Z*)-benzylidene)-3-(4-fluorobenzyl)-1,4,7,10,13-pentaazacyclopentadecane-2,5,8,11,14-pentaone (5d')**

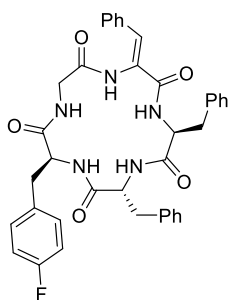

To a round bottom flask equipped with a stir bar was added pentapeptide **S11** (1 g, 1.26 mmol), HOAt (343 mg, 2.52 mmol), and DMF (252 mL). The reaction mixture was cooled to 0 °C and *i*-Pr<sub>2</sub>EtN (1.1 mL, 6.3 mmol) was added. HATU (1.2 g, 3.15 mmol) was added in portions and the reaction warmed to rt and stirred for 25 h. The solvent was removed under reduced pressure and the product was filtered and triturated with methanol and DCM to

afford the product as a white solid (398 mg, 48%). <sup>1</sup>H NMR (499 MHz, DMSO) δ 9.97 (s, 1H), 8.70 (d, *J* = 7.4 Hz, 1H), 8.29 (d, *J* = 8.8 Hz, 1H), 8.20 (t, *J* = 5.0 Hz, 1H), 7.57 (d, *J* = 7.4 Hz, 2H), 7.46 – 7.30 (m, 4H), 7.25 – 7.13 (m, *J* = 21.7, 12.0, 4.6 Hz, 8H), 7.11 – 7.02 (m, 4H), 7.01 –

6.95 (m, 3H), 4.57 (dd,  $J = 13.5, 7.0$  Hz, 1H), 4.51 (td,  $J = 9.7, 4.4$  Hz, 1H), 4.39 (dd,  $J = 14.6, 7.5$  Hz, 1H), 3.90 (dd,  $J = 15.2, 6.6$  Hz, 1H), 3.83 (dd,  $J = 15.2, 3.8$  Hz, 1H), 3.00 (m, 2H), 2.88 – 2.72 (m, 3H), 2.67 (dd,  $J = 14.1, 8.3$  Hz, 1H).  $^{13}\text{C}$  NMR (126 MHz, DMSO,  $d_1=5$  s)  $\delta$  171.9, 171.2, 170.9, 169.2, 165.0, 160.9 (d,  $J = 241.6$  Hz), 137.5, 137.3, 134.0 (d,  $J = 3.0$  Hz), 133.6, 130.7 (d,  $J = 8.0$  Hz), 129.6, 129.2, 128.9, 128.8, 128.7, 128.6, 128.1, 128.1, 128.0, 126.2, 126.1, 114.8 (d,  $J = 21.0$  Hz), 54.4, 54.3, 54.2, 42.4, 37.8, 35.9, 35.0.  $^{19}\text{F}$  NMR (376 MHz, DMSO)  $\delta$  -117.17. IR (ATR): 3089, 2954, 1634, 1551, 1506, 1210  $\text{cm}^{-1}$ . HRMS (ESI-TOF)  $m/z$  calc'd for  $\text{C}_{38}\text{H}_{36}\text{FN}_5\text{O}_5\text{Na}$   $[\text{M}+\text{Na}]^+$ : 684.2598, found: 684.2586.  $[\alpha]^{26}_{\text{D}} +154$  ( $c = 0.27$ , DMF).

vi) Synthesis of pentapeptide **6a'**

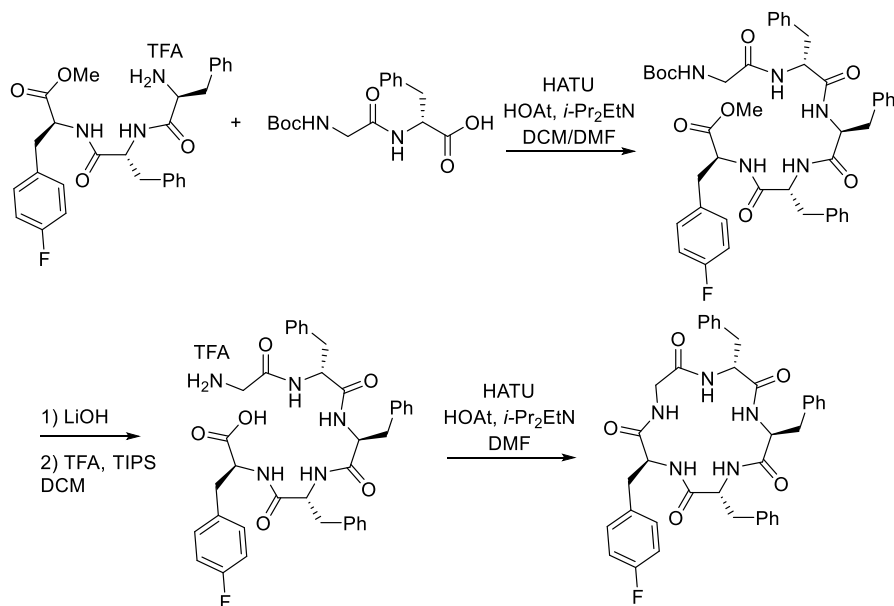

(*tert*-butoxycarbonyl)glycyl-D-phenylalanine

(S12)

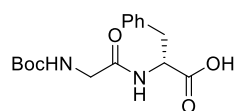

To a round bottom flask equipped with a stir bar was added the Boc-Gly-OH (2 g, 11.4 mmol), Boc-D-Phe-OH (2.7 g, 7.9 mmol), HOBT·H<sub>2</sub>O (2.3 g, 13.7 mmol), and DCM (143 mL). The mixture was cooled to 0 °C and *i*-Pr<sub>2</sub>EtN (6 mL, 34.2 mmol) was subsequently added. EDCI·HCl (2.6 g, 13.7 mmol) was added in portions and the reaction gradually warmed to rt and stirred for 6 h. The reaction mixture was transferred to a separatory funnel and was washed with sat. NaHCO<sub>3</sub> (aq), 10% KHSO<sub>4</sub> (aq), and brine. The organic phase was dried over Na<sub>2</sub>SO<sub>4</sub>, filtered, and concentrated under reduced pressure. The crude reaction mixture was purified via column chromatography (eluting with 2:3 hexanes/EtOAc) to

afford the dipeptide as a colorless oil (3.5 g, 92%). Characterization data was consistent with those previously reported.<sup>8</sup>

To a round bottom flask equipped with a stir bar was added Boc-Gly-Phe-OMe (3.5 g, 10.4 mmol), THF (49 mL), and H<sub>2</sub>O (40 mL). The mixture was cooled to 0 °C and 1 M LiOH (aq) (18.7 mL, 18.7 mmol) was subsequently added. The reaction gradually warmed to rt and stirred for 31 h. The reaction mixture was acidified with 10% KHSO<sub>4</sub> (aq), and the THF was concentrated under reduced pressure. The reaction mixture was transferred to a separatory funnel where it was extracted with DCM (3 x 100 mL). The organic layer was washed with 100 mL brine, dried over Na<sub>2</sub>SO<sub>4</sub>, filtered, and concentrated under reduced pressure to afford the title compound as a white solid (3.5 g, >99%). Characterization data was consistent with those previously reported.<sup>9</sup>

**Methyl (9R,12S,15R,18S)-9,12,15-tribenzyl-18-(4-fluorobenzyl)-2,2-dimethyl-4,7,10,13,16-pentaoxo-3-oxa-5,8,11,14,17-pentaazanonadecan-19-oate (S13)**

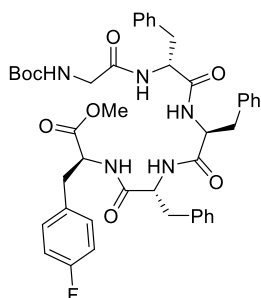

To a round bottom flask equipped with a stir bar was added the dipeptide **S12** (536 mg, 1.65 mmol), tripeptide **S9** (1 g, 1.65 mmol), DCM (10 mL), and DMF (2.5 mL). The reaction mixture was cooled to 0 °C and *i*-Pr<sub>2</sub>EtN (2.0 mL, 11.6 mmol) was added. HATU (743 mg, 1.98 mmol) was added in portions and the reaction warmed to rt and stirred for 12 h. The reaction mixture was washed with sat. NaHCO<sub>3</sub> (aq), 10% KHSO<sub>4</sub> (aq), and brine.

The organic phase was dried over Na<sub>2</sub>SO<sub>4</sub>, filtered, and concentrated under reduced pressure. The crude reaction mixture was dried further on the high vacuum and was purified via column chromatography (eluting with 20:1 DCM/MeOH) to afford a white solid. The solid was further triturated with Et<sub>2</sub>O to give pentapeptide **S13** as a white solid (669 mg, 51%). <sup>1</sup>H NMR (600 MHz, DMSO) δ 8.69 (d, *J* = 8.2 Hz, 1H), 8.43 (d, *J* = 8.8 Hz, 1H), 8.32 (d, *J* = 8.7 Hz, 1H), 7.65 (d, *J* = 8.3 Hz, 1H), 7.32 – 7.05 (m, 17H), 6.91 – 6.78 (m, 2H), 4.66 – 4.58 (m, 1H), 4.57 – 4.51 (m, 1H), 4.51 – 4.45 (m, 1H), 3.64 (s, 3H), 3.47 (dd, *J* = 16.8, 5.7 Hz, 1H), 3.39 (dd, *J* = 16.9, 6.1 Hz, 1H), 3.07 (dd, *J* = 13.7, 4.9 Hz, 1H), 2.85 (dd, *J* = 13.6, 10.1 Hz, 1H), 2.70 (dd, *J* = 13.1, 3.1 Hz, 1H), 2.59 – 2.52 (m, 1H), 2.40 – 2.27 (m, 1H), 1.33 (s, 9H). <sup>13</sup>C NMR (151 MHz, DMSO) δ 171.8, 171.1, 170.8, 170.4, 168.8, 161.1 (d, *J* = 242.2 Hz), 155.6, 137.9, 137.6, 137.4, 133.2 (d, *J* = 2.8 Hz), 131.2 (d, *J* = 8.0 Hz), 129.37, 129.35, 129.2, 127.91, 127.89, 127.8, 126.3, 126.2, 126.0, 114.9 (d, *J* = 21.1 Hz), 78.0, 53.8, 53.5, 53.34, 53.27, 52.0, 43.0, 38.3, 38.04, 37.99, 36.2, 28.1. <sup>19</sup>F NMR

(376 MHz, DMSO)  $\delta$  -116.67. IR (ATR): 3083, 3027, 2927, 1629, 1534, 1495, 1227, 1154  $\text{cm}^{-1}$ . HRMS (ESI-TOF)  $m/z$  calc'd for  $\text{C}_{44}\text{H}_{50}\text{FN}_5\text{O}_8\text{Na}$   $[\text{M}+\text{Na}]^+$ : 818.3541, found: 818.3521.  $[\alpha]^{24}_{\text{D}} +18$  ( $c = 0.28$ ,  $\text{CHCl}_3$ ).

**(2*S*,5*R*,8*S*,11*R*)-14-amino-5,8,11-tribenzyl-2-(4-fluorobenzyl)-4,7,10,13-tetraoxo-3,6,9,12-tetraazatetradecanoic acid (S14)**

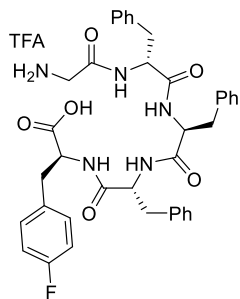

To a round bottom flask equipped with a stir bar was added pentapeptide **S13** (550 mg, 0.69 mmol), THF (7 mL), and  $\text{H}_2\text{O}$  (5 mL). The mixture was cooled to 0 °C and 1 M LiOH (aq) (2.3 mL, 2.3 mmol) was subsequently added. The reaction gradually warmed to rt and stirred for 35 h. The reaction mixture was acidified with 10%  $\text{KHSO}_4$  (aq), and the THF was concentrated under reduced pressure. The reaction mixture was transferred to a separatory funnel

where it was extracted with DCM (3 x 100 mL). The organic layer was washed with 100 mL brine, dried over  $\text{Na}_2\text{SO}_4$ , filtered, and concentrated under reduced pressure to afford the desired carboxylic acid which was then used in the next step without further purification.

To a round bottom flask equipped with a stir bar was added the pentapeptide carboxylic acid (0.69 mmol), triisopropylsilane (0.2 mL, 0.79 mmol), and DCM (9.6 mL). The reaction mixture was cooled to 0 °C and TFA (0.900 mL, 11.9 mmol) was slowly added. The reaction slowly warmed to rt and stirred for 12 h. The DCM was concentrated under reduced pressure and to the mixture was added toluene to form a TFA azeotrope, which was subsequently concentrated under reduced pressure and triturated with  $\text{Et}_2\text{O}$  to afford pentapeptide **S14** as a white solid (621 mg, >99%).  $^1\text{H}$  NMR (600 MHz, DMSO, 330 K)  $\delta$  8.37 – 8.19 (m, 4H), 7.27 – 6.96 (m, 19H), 4.66 – 4.53 (m, 3H), 4.50 – 4.41 (m, 1H), 3.44 (d,  $J = 16.1$  Hz, 1H), 3.31 (d,  $J = 16.1$  Hz, 1H), 3.09 (dd,  $J = 13.8$ , 4.7 Hz, 1H), 2.85 (dd,  $J = 13.7$ , 9.3 Hz, 1H), 2.78 (dd,  $J = 13.7$ , 4.1 Hz, 1H), 2.68 – 2.59 (m, 1H), 2.53 (dd,  $J = 13.5$ , 10.6 Hz, 1H), 2.44 – 2.37 (m, 2H).  $^{13}\text{C}$  NMR (151 MHz, DMSO, 330 K)  $\delta$  173.1, 171.3, 171.1, 170.6, 166.3, 161.6 (d,  $J = 241.9$  Hz), 138.23, 138.17, 137.9, 134.2 (d,  $J = 3.1$  Hz), 131.6 (d,  $J = 7.9$  Hz), 129.78, 129.76, 129.6, 128.4, 128.34, 128.29, 126.69, 126.65, 126.63, 115.2 (d,  $J = 21.2$  Hz), 54.2, 54.2, 54.1, 54.0, 40.8, 38.7, 38.6, 38.5, 37.0.  $^{19}\text{F}$  NMR (376 MHz, DMSO)  $\delta$  -117.01. IR (ATR): 3061, 3016, 2910, 1640, 1545, 1501, 1221  $\text{cm}^{-1}$ . HRMS (ESI-TOF)  $m/z$  calc'd for  $\text{C}_{38}\text{H}_{40}\text{FN}_5\text{O}_6\text{Na}$   $[\text{M}+\text{Na}]^+$ : 704.2860, found: 704.2859.  $[\alpha]^{26}_{\text{D}} +7$  ( $c = 0.52$ , MeOH).

**(3S,6R,9S,12R)-6,9,12-tribenzyl-3-(4-fluorobenzyl)-1,4,7,10,13-pentaazacyclopentadecane-2,5,8,11,14-pentaone (6a')**

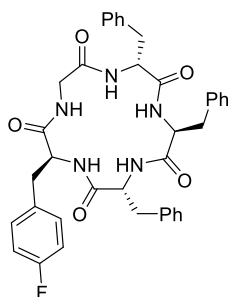

To a round bottom flask equipped with a stir bar was added pentapeptide **S14** (200 mg, 0.250 mmol), HOAt (85.1 mg, 0.625 mmol), and DMF (250 mL). The reaction mixture was cooled to 0 °C and *i*-Pr<sub>2</sub>EtN (0.22 mL, 1.25 mmol) was added. HATU (238 mg, 0.625 mmol) was added in portions and the reaction warmed to rt and stirred for 12 h. The solvent was removed under reduced pressure and then purified by column chromatography (eluting with 4:1 DCM/EtOH) to afford a solid. This solid was further triturated with MeOH and Et<sub>2</sub>O to give the title compound as a white solid (20 mg, 12%, >20:1 *dr*). <sup>1</sup>H NMR (400 MHz, DMSO) δ 8.75 (d, *J* = 6.8 Hz, 1H), 8.54 (d, *J* = 8.3 Hz, 1H), 8.38 (t, *J* = 6 Hz, 1H), 7.85 (d, *J* = 8.5 Hz, 1H), 7.64 (d, *J* = 7.2 Hz, 1H), 7.28 – 6.96 (m, 19H), 4.65 – 4.55 (m, 1H), 4.54 – 4.43 (m, 2H), 4.40 – 4.32 (m, 1H), 4.26 – 4.16 (m, 1H), 3.71 (dd, *J* = 16.2, 6.4 Hz, 1H), 3.47 (dd, *J* = 16.0, 5.2 Hz, 1H), 3.00 – 2.57 (m, 8H). <sup>13</sup>C NMR (151 MHz, DMSO) δ 171.3, 170.9, 170.7, 170.1, 168.4, 160.8 (d, *J* = 242.0 Hz), 137.51, 137.50, 136.9, 133.4 (d, *J* = 3.1 Hz), 130.5 (d, *J* = 8.0 Hz), 128.7, 128.43, 128.42, 127.8, 127.8, 127.7, 126.0, 125.80, 125.76, 114.6 (d, *J* = 21.1 Hz), 55.1, 54.0, 53.3, 53.0, 42.9, 37.4, 36.1, 35.0, 34.8. <sup>19</sup>F NMR (376 MHz, DMSO) δ -116.93. IR (ATR): 3055, 2927, 1646, 1540, 1204 cm<sup>-1</sup>. HRMS (ESI-TOF) *m/z* calc'd for C<sub>38</sub>H<sub>38</sub>FN<sub>5</sub>O<sub>5</sub>Na [M+Na]<sup>+</sup>: 686.2755, found: 686.2742. [ $\alpha$ ]<sub>D</sub><sup>27</sup> +6 (*c* = 0.18, DMF).

*vii) SPPS Syntheses*

**(3S,6S,9S,12S)-6,9,12-tribenzyl-3-(4-fluorobenzyl)-1,4,7,10,13-pentaazacyclopentadecane-2,5,8,11,14-pentaone (S15)**

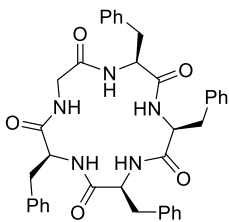

The corresponding linear pentapeptide was manually synthesized via Fmoc solid phase peptide synthesis (SPPS) using 2-chlorotrityl chloride (CTC) resin (substitution 1.1 mmol/g). The resin (0.360 g, 0.400 mmol) was swelled in anhydrous DCM (20 mL) for 45 min. The beads were washed once with DMF (peptide grade). DMF (10 mL), Fmoc-Phe-OH (620 mg, 1.60 mmol) and *i*-Pr<sub>2</sub>EtN (2.5 mL) were added and allowed to mix under N<sub>2</sub> for 15 minutes. The coupling with Fmoc-Phe-OH was repeated again. After the double coupling, the beads were washed with DMF and the Fmoc group was deprotected with 20% 4-methylpiperidine in DMF (20 mL) for 15 minutes.

This deprotection was repeated again. The resin was washed three times with DMF (15 mL) and a Kaiser test was performed to determine presence of deprotected amine. The beads were washed once with *N*-methyl-2-pyrrolidone (15 mL). To begin the next coupling, NMP (10 mL), Fmoc-Phe-OH (620 mg, 1.6 mmol), HBTU (610 mg, 1.6 mmol), and *i*-Pr<sub>2</sub>EtN (2.5 mL) were added and the resin bubbled under N<sub>2</sub> for 30 min. The completion of the coupling was monitored by the Kaiser test. If incomplete, the coupling step was repeated again. The resin was washed three times with DMF (15 mL). The deprotection of the Fmoc group was repeated as above two times. To elongate the peptide, the coupling and deprotection steps were performed with Fmoc-Phe-OH, Fmoc-Phe-OH, and Fmoc-Gly-OH. After the last amino acid was deprotected, the beads were washed three times with DMF. To the resin was added 40 mL cleavage solution (95% TFA, 2.5% H<sub>2</sub>O, 2.5% triisopropylsilane), and the resin bubbled under N<sub>2</sub> for 3 h. A new receiving flask was replaced on the peptide synthesizer and the TFA was drained into the new flask. The TFA solution was separated into 4 conical vials and cold ether (−20 °C) was added to precipitate the peptide. The vials were centrifuged (3000 rpm, 0–4 °C) for 20 minutes. The remaining TFA and ether solution was decanted from the conical vials and the peptide precipitate was concentrated. Then to a round bottom flask equipped with a stir bar was added the linear pentapeptide (0.400 mmol), HOAt (136 mg, 1.00 mmol), and DMF (400 mL). The reaction mixture was cooled to 0 °C and *i*-Pr<sub>2</sub>EtN (0.348 mL, 2.00 mmol) was added. HATU (380 mg, 1.00 mmol) was added in portions and the reaction warmed to rt and stirred for 12 h. The solvent was concentrated under reduced pressure and a white solid formed. This solid was then filtered and triturated with DCM, MeOH, and Et<sub>2</sub>O to afford the title compound as a white solid (92 mg, 36% overall). The <sup>1</sup>H-NMR spectrum was consistent with the cyclic pentapeptide **6b** obtained after asymmetric hydrogenation (Supplementary Figure 6 and 7).

**(3*S*,6*S*,9*S*,12*S*)-6,9,12-tribenzyl-3-(4-fluorobenzyl)-1,4,7,10,13-pentaazacyclopentadecane-2,5,8,11,14-pentaone (S16)**

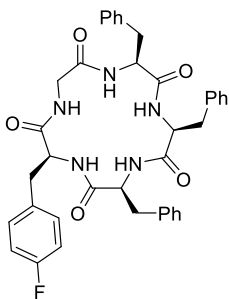

The corresponding linear pentapeptide was manually synthesized via Fmoc solid phase peptide synthesis (SPPS) using 2-chlorotrityl chloride (CTC) resin (substitution 1.1 mmol/g). The resin (0.360 g, 0.400 mmol) was swelled in anhydrous DCM (20 mL) for 45 min. The beads were washed once with DMF (peptide grade). DMF (10 mL), Fmoc-4-fluoro-Phe-OH (649 mg, 1.60 mmol) and *i*-Pr<sub>2</sub>EtN (2.5 mL) were added and allowed to mix under N<sub>2</sub> for

15 minutes. The coupling with Fmoc-4-fluoro-Phe-OH was repeated again. After the double coupling, the beads were washed with DMF and the Fmoc group was deprotected with 20% 4-methylpiperidine in DMF (20 mL) for 15 minutes. This deprotection was repeated again. The resin was washed three times with DMF (15 mL) and a Kaiser test was performed to determine presence of deprotected amine. The beads were washed once with *N*-methyl-2-pyrrolidone (15 mL). To begin the next coupling, NMP (10 mL), Fmoc-Phe-OH (620 mg, 1.6 mmol), HBTU (610 mg, 1.6 mmol), and *i*-Pr<sub>2</sub>EtN (2.5 mL) were added and the resin bubbled under N<sub>2</sub> for 30 min. The completion of the coupling was monitored by the Kaiser test. If incomplete, the coupling step was repeated again. The resin was washed three times with DMF (15 mL). The deprotection of the Fmoc group was repeated as above two times. To elongate the peptide, the coupling and deprotection steps were performed with Fmoc-Phe-OH, Fmoc-Phe-OH, and Fmoc-Gly-OH. After the last amino acid was deprotected, the beads were washed three times with DMF. To the resin was added 40 mL cleavage solution (95% TFA, 2.5% H<sub>2</sub>O, 2.5% triisopropylsilane), and the resin bubbled under N<sub>2</sub> for 3 h. A new receiving flask was replaced on the peptide synthesizer and the TFA was drained into the new flask. The TFA solution was separated into 4 conical vials and cold ether (−20 °C) was added to precipitate the peptide. The vials were centrifuged (3000 rpm, 0–4 °C) for 20 minutes. The remaining TFA and ether solution was decanted from the conical vials and the peptide precipitate was concentrated. Then to a round bottom flask equipped with a stir bar was added the linear pentapeptide (0.400 mmol), HOAt (136 mg, 1.00 mmol), and DMF (400 mL). The reaction mixture was cooled to 0 °C and *i*-Pr<sub>2</sub>EtN (0.348 mL, 2.00 mmol) was added. HATU (380 mg, 1.00 mmol) was added in portions and the reaction warmed to rt and stirred for 12 h. The solvent was concentrated under reduced pressure and a white solid formed. This solid was then filtered and triturated with DCM, MeOH, and Et<sub>2</sub>O to afford the title compound as a white solid (61 mg, 23% overall). <sup>1</sup>H NMR (600 MHz, DMSO) δ 8.52 (br t, *J* = 5.2 Hz, 1H), 8.35 (d, *J* = 7.5 Hz, 1H), 8.32 (d, *J* = 8.1 Hz, 1H), 8.25 (d, *J* = 7.8 Hz, 1H), 7.95 (d, *J* = 8.3 Hz, 1H), 7.32 – 6.98 (m, 19H), 4.37 – 4.29 (m, 1H), 4.29 – 4.19 (m, 2H), 4.08 – 3.97 (m, 1H), 3.92 (dd, *J* = 14.4, 5.8 Hz, 1H), 3.29 (dd, *J* = 14.3, 4.8 Hz, 1H), 3.12 – 2.84 (m, 7H), 2.80 – 2.69 (m, 1H). <sup>13</sup>C NMR (151 MHz, DMSO) δ 171.4, 171.1, 170.7, 170.6, 169.2, 161.0 (d, *J* = 241.6 Hz), 137.7, 137.5, 137.4, 134.2 (d, *J* = 2.8 Hz), 130.9 (d, *J* = 8.0 Hz), 129.2, 129.1, 129.0, 128.9, 128.3, 128.2, 126.39, 126.37, 126.35, 114.9 (d, *J* = 21.0 Hz), 57.4, 55.9, 55.8, 54.6, 43.3, 36.9, 36.5, 35.7, 30.7. <sup>19</sup>F NMR (376 MHz, DMSO) δ -117.17. IR (ATR): 3083, 3022, 2932, 1640, 1495, 1216 cm<sup>−1</sup>. HRMS (ESI-

TOF)  $m/z$  calc'd for  $C_{38}H_{38}FN_5O_5$   $[M+Na]^+$ : 686.2755, found: 686.2736.  $[\alpha]^{27}_D -97$  ( $c = 0.22$ , DMF).

### 3) General procedures for hydrogenation

*Representative examples:*

#### Method A – Hydrogenation using Schlenk tube

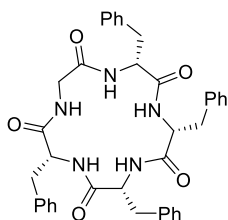

#### (3R,6R,9R,12R)-3,6,9,12-tetrabenzyl-1,4,7,10,13-pentaazacyclopentadecane-2,5,8,11,14-pentaone (6b)

In a nitrogen-filled glove box, to a Schlenk vial equipped with a stir bar was added (*R,R',S,S'*)-DuanPhos (3 mg, 0.0079 mmol) and  $[Rh(cod)_2]BF_4$  (3 mg, 0.0075 mmol) in dry and degassed MeOH (2 mL). This mixture was stirred at rt for 5 min, then cyclic peptide **5a** (128 mg, 0.2 mmol) in MeOH (4 mL) was added to this mixture. The Schlenk tube was sealed, removed from the nitrogen box, and then connected to a Schlenk line (vacuum gas manifold). The pre-catalyst solution was degassed via three cycles of 'freeze-pump-thaw'. On the last 'thaw' cycle, the Schlenk tube was backfilled with  $H_2$  gas and subsequently sealed while the reaction mixture was still frozen. The Schlenk tube was allowed to thaw to pressurize the vial and the reaction mixture was stirred at rt for 48 h, over which an off-white solid precipitated from the solution. The heterogeneous mixture was then collected into a scintillation vial and concentrated under reduced pressure. The resulting crude solid was triturated in DCM and MeOH and then filtered to afford an off-white solid (108 mg, 86%, >99% *ee*).  $^1H$  NMR (300 MHz, DMSO)  $\delta$  8.53 (t,  $J = 5.4$  Hz, 1H), 8.34 (d,  $J = 7.4$  Hz, 1H), 8.33 (d,  $J = 8.0$  Hz, 1H), 8.23 (d,  $J = 8.0$  Hz, 1H), 7.98 (d,  $J = 8.4$  Hz, 1H), 7.31 – 7.10 (m, 18H), 7.09 - 7.02 (m, 2H), 4.35 (m, 1H), 4.24 (m, 2H), 4.04 (q,  $J = 7.8$  Hz, 1H), 3.92 (dd,  $J = 14.5, 6.0$  Hz, 1H), 3.28 (dd,  $J = 14.5, 5.1$  Hz, 1H), 3.17 (d,  $J = 5.3$  Hz, 1H), 3.11 (dd,  $J = 13.8, 5.5$  Hz, 1H), 3.02 - 2.85 (m, 6H), 2.74 (dd,  $J = 14.1, 9.2$  Hz, 1H).  $^{13}C$  NMR (100 MHz, DMSO)  $\delta$  171.5, 171.1, 170.7, 170.6, 169.1, 138.0, 137.7, 137.5, 137.4, 129.1, 129.1, 129.0, 128.8, 128.19, 128.17, 126.3, 57.4, 56.0, 55.8, 54.6, 43.3, 36.9, 36.8, 36.6, 36.5. IR (ATR): 3295, 3028, 2926, 1615, 1528, 1496, 1454, 837  $cm^{-1}$ . HRMS (ESI-TOF)  $m/z$  calc'd for  $C_{38}H_{39}N_5O_5$   $[M+H]^+$ : 646.3020, found 646.3023.

**(3*R*,6*R*,9*R*,12*R*)-3,6,9,12-tetrabenzyl-1,4,7,10,13-pentaazacyclopentadecane-2,5,8,11,14-pentaone (6*b'*)**

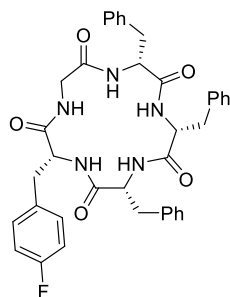

In a nitrogen-filled glove box, to a Schlenk vial equipped with a stir bar was added (*R,R',S,S'*)-DuanPhos (0.29 mg, 0.00076 mmol) and [Rh(cod)<sub>2</sub>]BF<sub>4</sub> (0.31 mg, 0.00076 mmol) in dry and degassed MeOH (0.350 mL). This mixture was stirred at rt for 5 min, then cyclic peptide **1** (10 mg, 0.015 mmol) in MeOH (0.300 mL) was added to this mixture. The Schlenk tube was sealed, removed from the nitrogen box, and then connected to a Schlenk line (vacuum gas manifold). The pre-catalyst solution was degassed via three cycles of 'freeze-pump-thaw'. On the last 'thaw' cycle, the Schlenk tube was backfilled with H<sub>2</sub> gas and subsequently sealed while the reaction mixture was still frozen. The Schlenk tube was allowed to thaw to pressurize the vial and the reaction mixture was stirred at 50 °C for 48 h, over which an off-white solid precipitated from the solution. The heterogeneous mixture was then collected into a scintillation vial and concentrated under reduced pressure. The resulting crude solid was triturated in DCM and MeOH and then filtered to afford an off-white solid (7.2 mg, 72%, 20:<1 *dr*). The diastereoselectivity was determined by <sup>19</sup>F-NMR analysis of the unpurified reaction mixture. The <sup>1</sup>H-NMR spectrum of **6b'** was consistent with an authentic sample synthesized via SPPS (page 26). <sup>1</sup>H NMR (400 MHz, DMSO) δ 8.52 (br t, *J* = 5.4 Hz, 1H), 8.36 (d, *J* = 7.8 Hz, 1H), 8.33 (d, *J* = 7.8 Hz, 1H), 8.25 (d, *J* = 8.1 Hz, 1H), 7.96 (d, *J* = 5.3 Hz, 1H), 7.32 – 6.96 (m, 19H), 4.38 – 4.29 (m, 1H), 4.29 – 4.19 (m, 2H), 4.07 – 3.99 (m, 1H), 3.92 (dd, *J* = 14.1, 5.7 Hz, 1H), 3.30 – 3.24 (m, 1H), 3.14 – 2.81 (m, 7H), 2.81 – 2.63 (m, 1H).

**Method B – Hydrogenation using Hel Reactor**

**(3*S*,6*R*,9*S*,12*R*)-6,9,12-tribenzyl-3-(4-fluorobenzyl)-1,4,7,10,13-pentaazacyclopentadecane-2,5,8,11,14-pentaone (±)-6*a'***

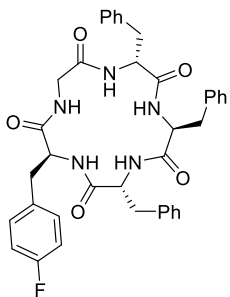

In a N<sub>2</sub>-filled glovebox, [Rh(cod)<sub>2</sub>]BF<sub>4</sub> (0.31 mg, 0.00076 mmol, 5 mol%) and dppp (0.32 mg, 0.00076 mmol, 5 mol%) in MeOH/DMF (4:1, 306 μL, 0.05 M) were added to a ½ dr vial equipped with a stir bar containing pentapeptide **5a'** (10 mg, 0.0153 mmol). The vial was capped with a screwcap with a slitted rubber septum and taken outside of the glovebox. The vial was sonicated to ensure all contents were dissolved and then placed in the HEL CATalyst block and the head was screwed into place. The block was filled then purged three times with hydrogen,

and then pressurized with hydrogen to 7 atm (100 psi). The reaction stirred at 40 °C and was stopped after 48 h. The solvent was concentrated under reduced pressure and the reaction mixture was triturated with DCM to afford the title compound as an off-white solid (8.9 mg, 88%, 20:2:1:1:1 *dr*).<sup>b</sup> The diastereoselectivity was determined by <sup>19</sup>F-NMR analysis of the unpurified reaction mixture (For representative example, see Supplementary Figure 1). <sup>1</sup>H NMR (400 MHz, DMSO) δ 8.75 (d, *J* = 6.8 Hz, 1H), 8.54 (d, *J* = 8.3 Hz, 1H), 8.38 (t, *J* = 6 Hz, 1H), 7.85 (d, *J* = 8.5 Hz, 1H), 7.64 (d, *J* = 7.2 Hz, 1H), 7.28 – 6.96 (m, 19H), 4.65 – 4.55 (m, 1H), 4.54 – 4.43 (m, 2H), 4.40 – 4.32 (m, 1H), 4.26 – 4.16 (m, 1H), 3.71 (dd, *J* = 16.2, 6.4 Hz, 1H), 3.47 (dd, *J* = 16.0, 5.2 Hz, 1H), 3.00 – 2.57 (m, 8H). <sup>13</sup>C NMR (151 MHz, DMSO) δ 171.3, 170.9, 170.7, 170.1, 168.4, 160.8 (d, *J* = 242.0 Hz), 137.5, 137.5, 136.9, 133.4 (d, *J* = 3.1 Hz), 130.5 (d, *J* = 8.0 Hz), 128.7, 128.43, 128.42, 127.81, 127.75, 127.7, 126.0, 125.8, 125.7, 114.6 (d, *J* = 21.1 Hz), 55.1, 54.0, 53.3, 53.0, 42.9, 37.4, 36.1, 35.0, 34.8. <sup>19</sup>F NMR (376 MHz, DMSO) δ -116.93. IR (ATR): 3055, 2927, 1646, 1540, 1204 cm<sup>-1</sup>. HRMS (ESI-TOF) *m/z* calc'd for C<sub>38</sub>H<sub>38</sub>FN<sub>5</sub>O<sub>5</sub>Na [M+Na]<sup>+</sup>: 686.2755, found: 686.2742.

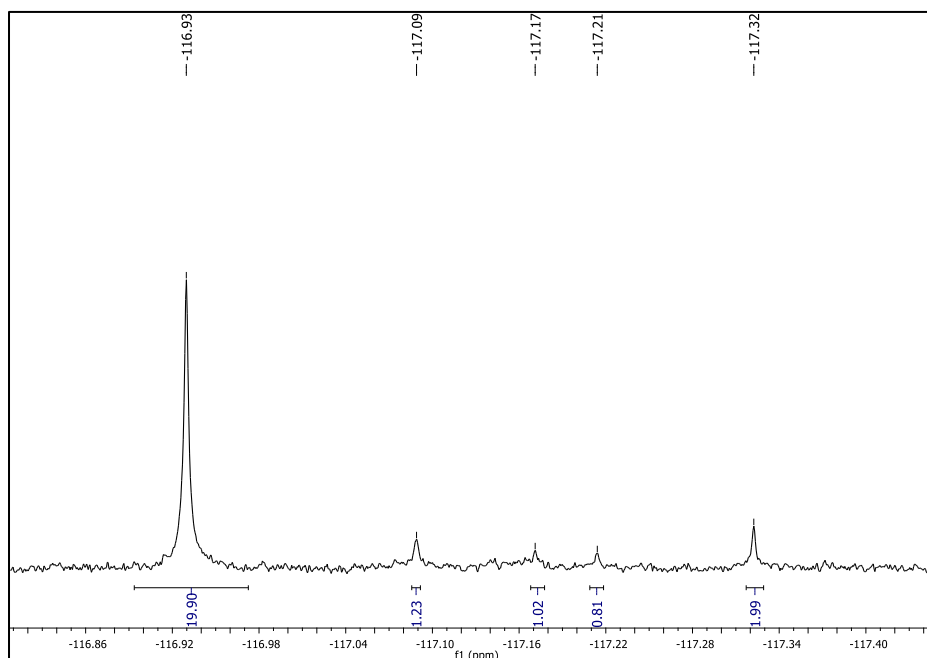

**Supplementary Figure 1.** Representative example for determination of diastereoselectivity by <sup>19</sup>F-NMR

<sup>b</sup> (±) Diastereomer **6a'** was observed as the major product (20:2:1:1:1). Four additional minor diastereomers were observed by <sup>19</sup>F-NMR spectroscopy. The other three possible diastereomers were not observed.

**Figure 4b, entry 1:** **6a'** was prepared according to method B using [Rh(cod)<sub>2</sub>]BF<sub>4</sub> (0.31 mg, 0.00076 mmol, 5 mol%) and dppp (0.32 mg, 0.00076 mmol, 5 mol%) in MeOH/DMF (4:1, 306  $\mu$ L, 0.05 M), and pentapeptide **5b'** (10 mg, 0.0153 mmol). The diastereoselectivity was determined by <sup>19</sup>F-NMR analysis of the unpurified reaction mixture. The product was isolated as an off white solid (7.7 mg, 76%, 20:<1:<1:<1:<1 *dr*).

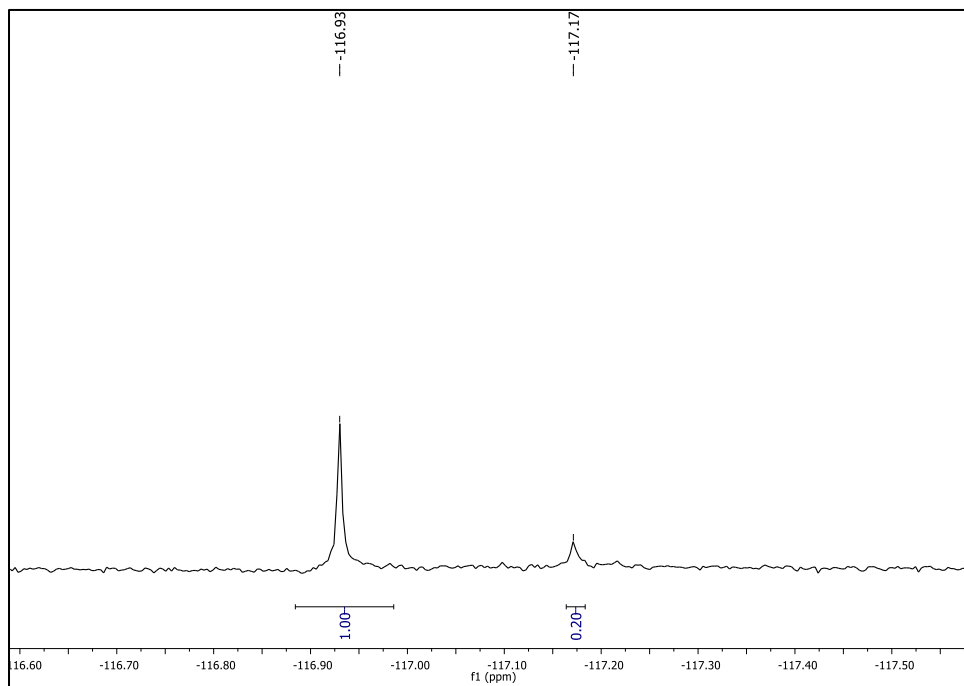

**Supplementary Figure 2.** <sup>19</sup>F-NMR of unpurified reaction mixture for entry 1.  
Peak at 117.17 ppm represents cyclic peptide intermediate **5d'**.

**Figure 4b, entry 2<sup>c</sup>:** **6a'** was prepared according to method B using [Rh(cod)<sub>2</sub>]BF<sub>4</sub> (0.15 mg, 0.00038 mmol, 5 mol%) and dppp (0.16 mg, 0.00038 mmol, 5 mol%) in MeOH/DMF (4:1, 304  $\mu$ L, 0.025 M), and pentapeptide **5c'** (5 mg, 0.0076 mmol) stirring at 60 °C and H<sub>2</sub> (20 atm). The diastereoselectivity was determined by <sup>19</sup>F-NMR analysis of the unpurified reaction mixture. The product was isolated as an off white solid (5.0 mg, 99%, 20:<1:<1:<1:<1 *dr*).

<sup>c</sup> Figure 4b entries 2 and 3 required higher temperature, pressure, and/or solvent due to difficulties with solubility as the number of dehydrophenylalanines decreases in the starting compound.

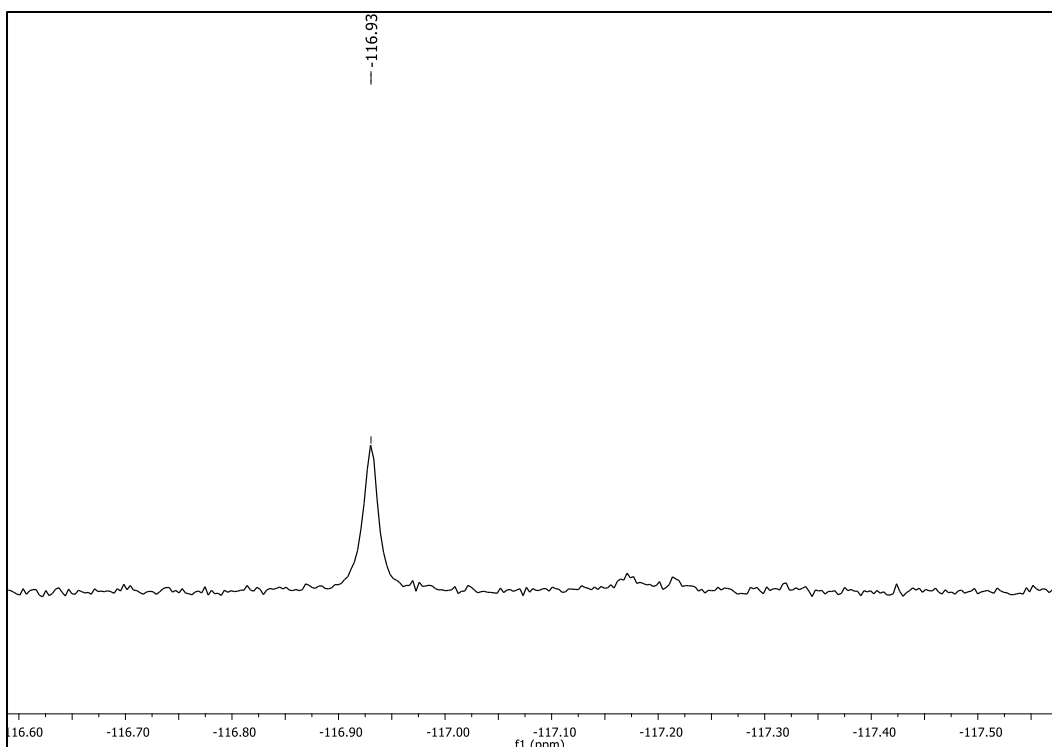

**Supplementary Figure 3.**  $^{19}\text{F}$ -NMR of unpurified reaction mixture for entry 2.

**Figure 4b, entry 3:** **6a'** was prepared according to method B using  $[\text{Rh}(\text{cod})_2]\text{BF}_4$  (0.31 mg, 0.00076 mmol, 10 mol%) and dppp (0.31 mg, 0.00076 mmol, 10 mol%) in THF (500  $\mu\text{L}$ , 0.015 M), and pentapeptide **5d'** (5 mg, 0.0076 mmol) stirring at 80  $^\circ\text{C}$  and  $\text{H}_2$  (40 atm). The diastereoselectivity was determined by  $^{19}\text{F}$ -NMR analysis of the unpurified reaction mixture. The product was isolated as an off white solid (5.0 mg, 99%, 20:<1:<1:<1:<1 *dr*).

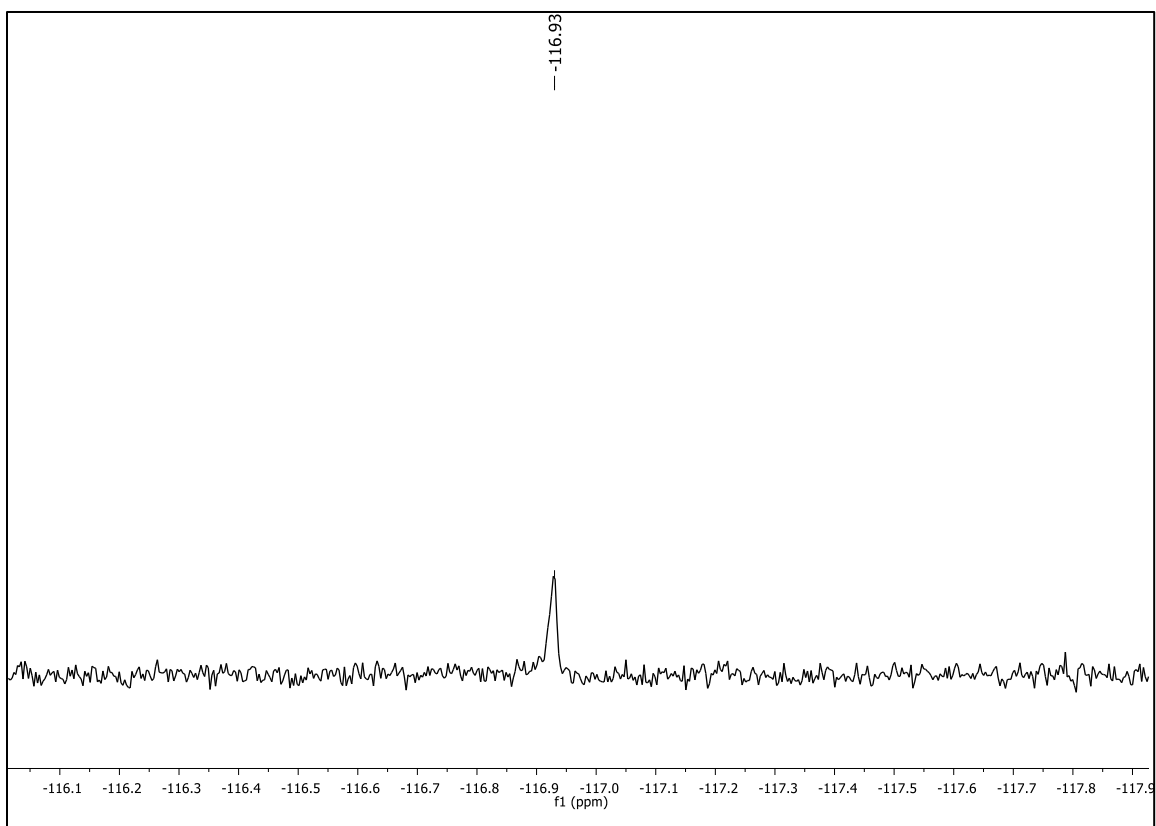

**Supplementary Figure 4.**  $^{19}\text{F}$ -NMR of unpurified reaction mixture for entry 3.

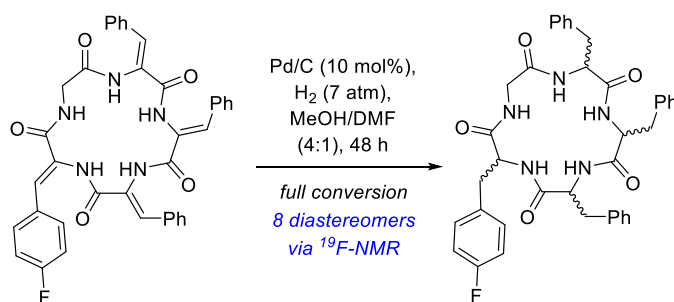

To a  $\frac{1}{2}$  dr vial equipped with a stir bar was added cyclic pentapeptide **5a'** (10 mg, 0.0153 mmol) and 10%  $\text{Pd/C}$  (1.6 mg, 0.00153 mmol, 10 mol%). The contents were dissolved in  $\text{MeOH/DMF}$  (4:1, 306  $\mu\text{L}$ , 0.05 M) and the vial was capped with a screwcap with a slitted rubber septum. The vial was sonicated to ensure all contents were dissolved and then placed in the HEL CATALYST block and the head was screwed into place. The block was filled then purged three times with hydrogen, and then pressurized with hydrogen to 7 atm. After 48 h and the reaction mixture was filtered through a plug of celite, eluted with  $\text{MeOH}$ , concentrated under reduced pressure and then

analyzed by  $^{19}\text{F}$ -NMR and LC-MS analysis, which showed the presence of 8 diastereomers (Supplementary Figure 5).

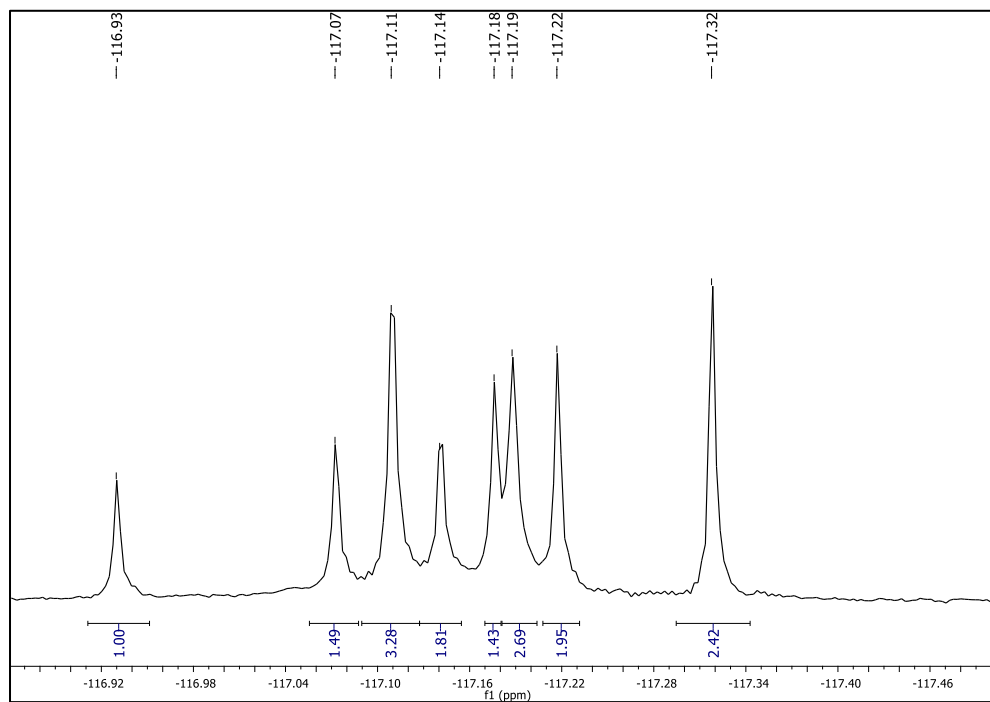

**Supplementary Figure 5.**  $^{19}\text{F}$ -NMR of unpurified reaction mixture after Pd/C hydrogenation (1.0:1.5:3.3:1.8:1.4:2.7:2.0:2.4 *dr*)

#### 4) Ligand evaluation

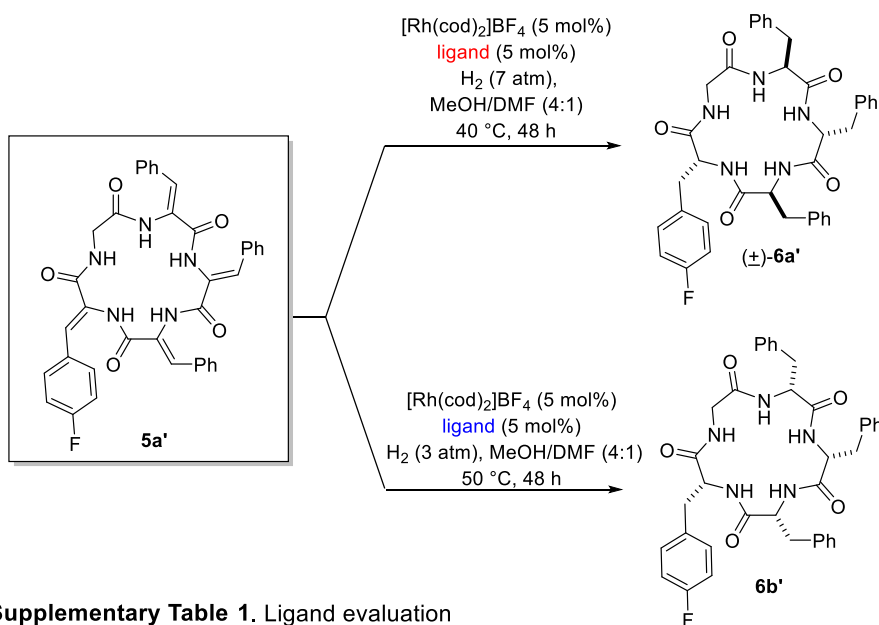

Supplementary Table 1. Ligand evaluation

| chiral ligands (yield of <b>6b'</b> )                                               |                                                                                     |                                                                                      |                                                                                      |                                                                                       |
|-------------------------------------------------------------------------------------|-------------------------------------------------------------------------------------|--------------------------------------------------------------------------------------|--------------------------------------------------------------------------------------|---------------------------------------------------------------------------------------|
| 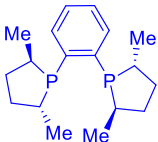  | 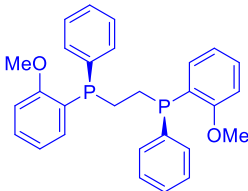  | 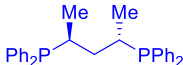 | 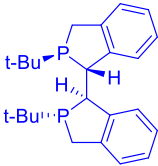 |                                                                                       |
| <b>(<i>R,R</i>)-Me-DuPhos</b><br>0%                                                 | <b>(<i>R,R</i>)-DIPAMP</b><br>0%                                                    | <b>(<i>S,S</i>)-BDPP</b><br>13%, dr n.d                                              | <b>(<i>R,R'</i>,<i>S,S'</i>)-DuanPhos</b><br>72% <sup>a</sup> , 20:<1 dr             |                                                                                       |
| achiral ligands (yield of ( <b>±</b> )- <b>6a'</b> )                                |                                                                                     |                                                                                      |                                                                                      |                                                                                       |
| 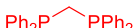 | 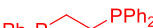 | 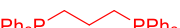  | 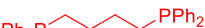 | 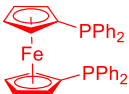 |
| <b>dppe</b><br>0%                                                                   | <b>dppe</b><br>0%                                                                   | <b>dppp</b><br>88% <sup>a</sup> , 20:2:1:1:1 dr                                      | <b>dppb</b><br>50%, 20:<1:<1:<1:<1 dr                                                | <b>dppf</b><br>0%                                                                     |

<sup>a</sup> Isolated yield

For the ligand evaluation of cyclic pentapeptide **5a'** to form **6b'**, method A was used for the hydrogenation (Supplementary Table 1). For the reaction of cyclic peptide **5a'** to form **(+)-6a'**, method B was used for the hydrogenation. Yields and diastereoselectivity were determined by  $^{19}\text{F}$ -NMR spectroscopy analysis of the unpurified reaction mixture.

## 5) NMR time trace

Five independent hydrogenations were set up using general hydrogenation procedure method B. The reaction was quenched at incomplete conversion at t=0 min, 7 min, 1 h, 16 h, and 48 h by opening the reaction to air.  $^{19}\text{F}$ -NMR time points in Figure 4a were performed on a 400 MHz Bruker DRX400 spectrometer at 298 K, 8 scans, and 30 s relaxation delay. The NMR spectra was taken in  $\text{DMSO-}d_6$  solvent.

## 6) Determination of absolute stereochemistry via SFC analysis

Column: IC, 40% MeOH isocratic, thermostat set to 44 °C, sample prepared in 1:1 DCM/MeOH

1. Cyclo(Gly-L-Phe-L-Phe-L-Phe-L-Phe) (**S15**) made from authentic (L-Phe) $_4$ -OH and **6b**

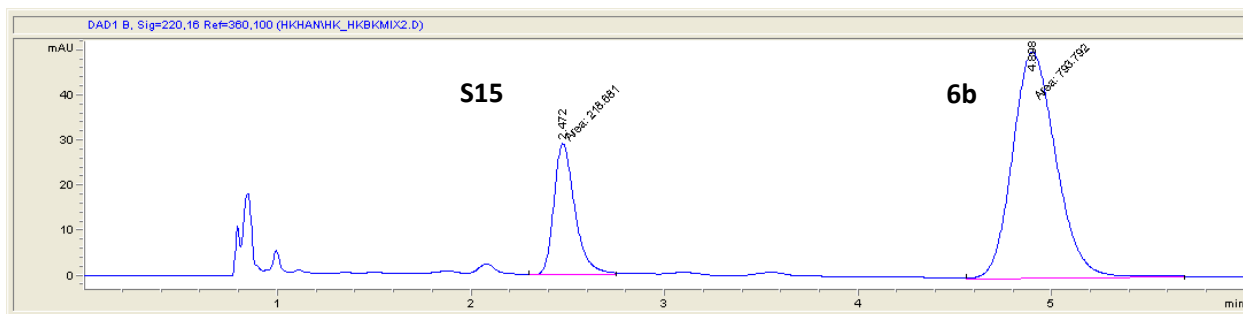

2. **S15** made from hydrogenation of pentapeptide **5a** with (*S,S',R,R'*)-DuanPhos as the ligand

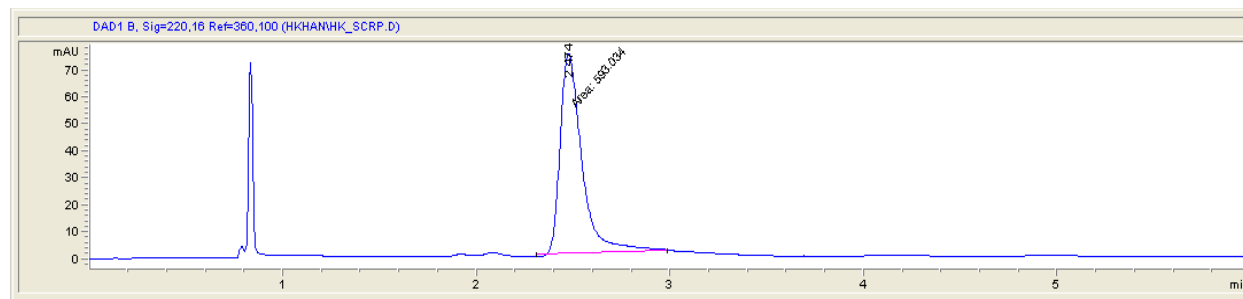

3. **6b** made from hydrogenation of **5a** using (*R,R'*,*S,S'*)-Duanphos

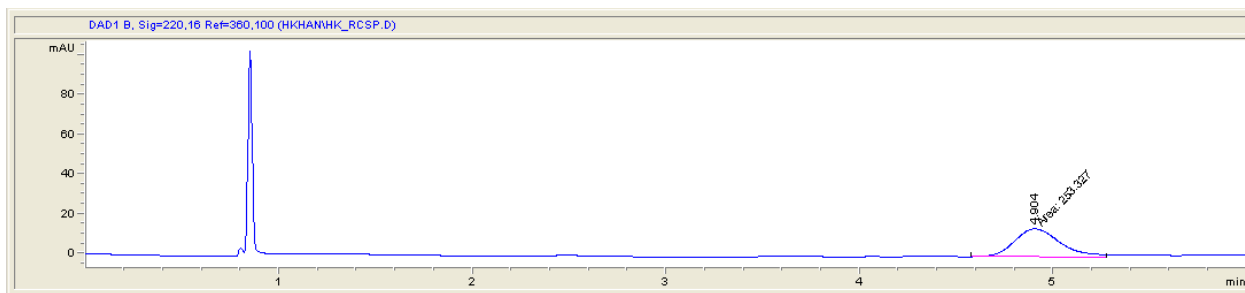

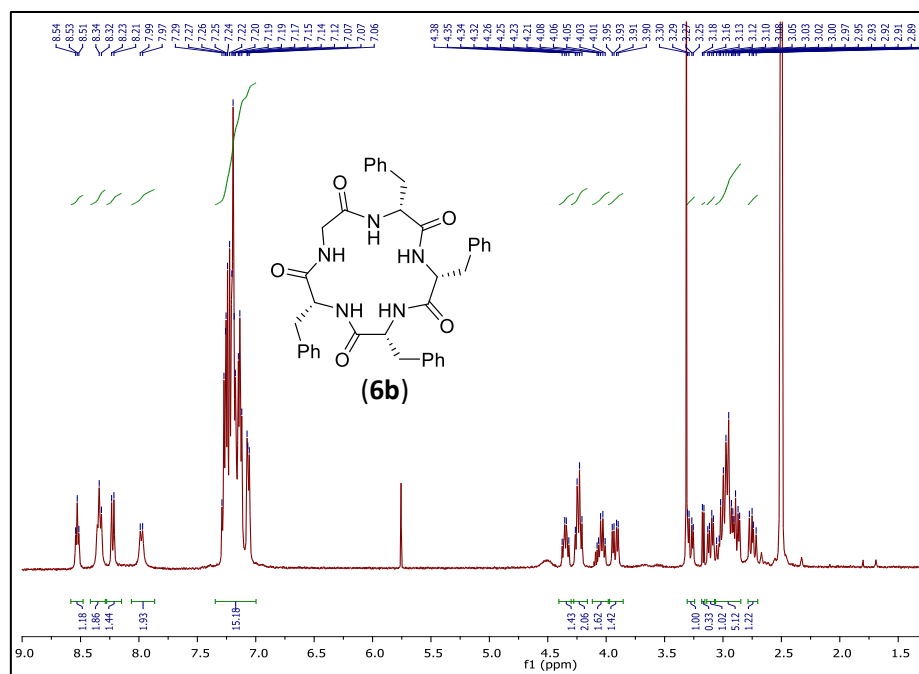

**Supplementary Figure 6.**  $^1\text{H}$ -NMR of cyclic pentapeptide **6b** after hydrogenation using (*R,R'*,*S,S'*)-Duanphos

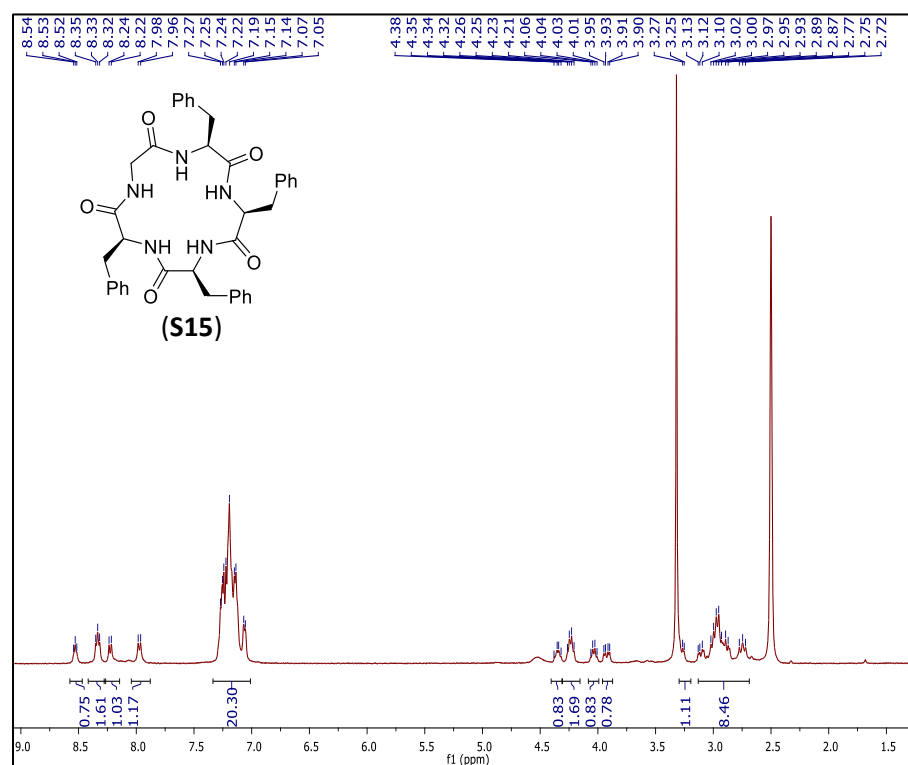

**Supplementary Figure 7.**  $^1\text{H}$ -NMR of cyclic pentapeptide **S15** made via SPPS

The absolute stereochemistry of **6b** when using Rh(cod)<sub>2</sub>BF<sub>4</sub> and (*R,R'*,*S,S'*)-Duanphos gives the D-amino acid configuration.

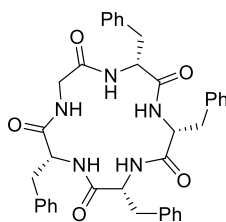

## 7) Computational Data

### *i) Transition state force field sampling*

The Q2MM transition state force field for the rhodium catalyzed hydrogenation of enamides, previously developed in our group,<sup>10,11</sup> was used to study the various hydrogenation transition states leading to the oligopeptides shown in Supplementary Figure 8. Various conformational search algorithms in MacroModel (2016 release 3) were used for the sampling, including MacroModel's Monte Carlo multiple minimum searching (MCMM),<sup>12,13</sup> low-mode conformational searching (LMCS),<sup>14,15</sup> and low-mode conformational searching for large molecules (LMC2).<sup>16,17</sup> The results of all the searches using the various methods are aggregated into the final ensembles used for Boltzmann averaging. The extent of the sampling is shown in Supplementary Table 2.

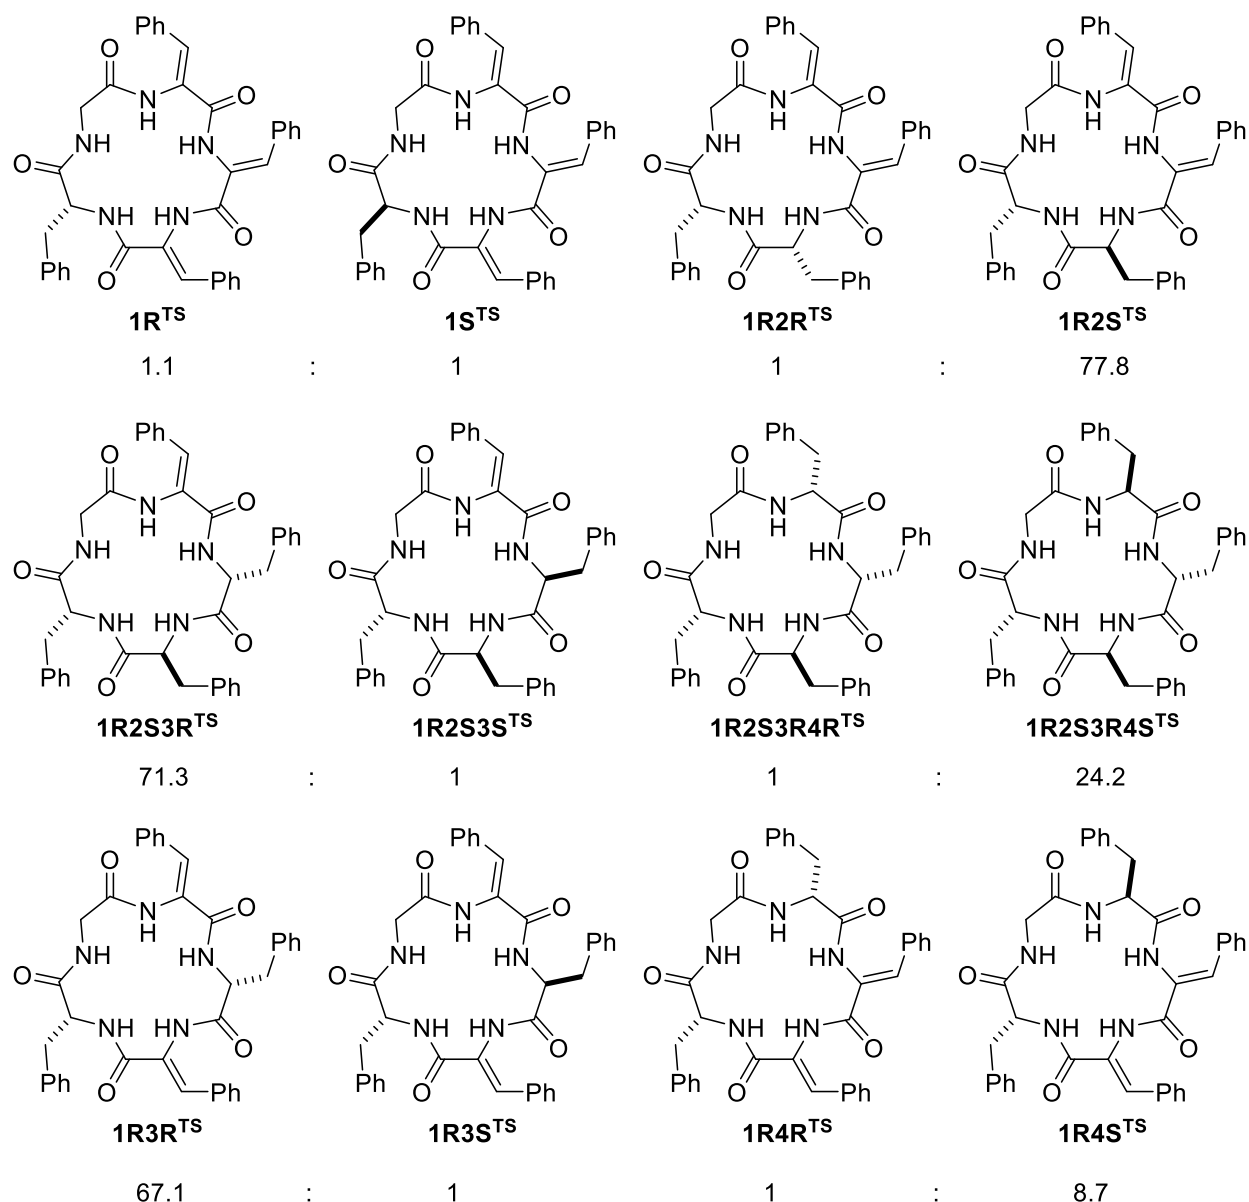

**Supplementary Figure 8.** The rhodium catalyzed diastereomeric hydrogenation transition states leading to these oligopeptides were extensively sampled using the Q2MM TSFF. The predicted *anti* : *syn* ratio, predicted from the TSFF Boltzmann populations, is shown below each pair of diastereomeric transition states.

| Conformer                  | MCMM steps | LMCS steps | LMC2 steps | Total steps | Energy (kJ/mol) | Total conformers |
|----------------------------|------------|------------|------------|-------------|-----------------|------------------|
| <b>1R<sup>TS</sup></b>     | 200000     | 5000       | 401000     | 606000      | 544.5           | 2142             |
| <b>1R2R<sup>TS</sup></b>   | 10000      | 55000      | 50000      | 115000      | 600.1           | 2650             |
| <b>1R2S<sup>TS</sup></b>   | 10000      | 55000      | 50000      | 115000      | 586.3           | 989              |
| <b>1R2S3R<sup>TS</sup></b> | 20000      | 105000     | 50000      | 175000      | 621.2           | 699              |

| Conformer                    | MCMM<br>steps | LMCS<br>steps | LMC2<br>steps | Total<br>steps | Energy<br>(kJ/mol) | Total<br>conformers |
|------------------------------|---------------|---------------|---------------|----------------|--------------------|---------------------|
| <b>1R2S3R4R<sup>TS</sup></b> | 10000         | 55000         | 50000         | 115000         | 681.5              | 2215                |
| <b>1R2S3R4S<sup>TS</sup></b> | 10000         | 55000         | 50000         | 115000         | 673.1              | 1160                |
| <b>1R2S3S<sup>TS</sup></b>   | 30000         | 105000        | 50000         | 185000         | 633.4              | 1674                |
| <b>1R3R<sup>TS</sup></b>     | 0             | 100000        | 0             | 100000         | 566.5              | 437                 |
| <b>1R3S<sup>TS</sup></b>     | 0             | 100000        | 0             | 100000         | 572.7              | 714                 |
| <b>1R4R<sup>TS</sup></b>     | 0             | 55000         | 0             | 55000          | 577.9              | 787                 |
| <b>1R4S<sup>TS</sup></b>     | 0             | 55000         | 0             | 55000          | 573.1              | 721                 |
| <b>1S<sup>TS</sup></b>       | 10000         | 5000          | 261000        | 276000         | 544.5              | 648                 |
| <b>1S2R<sup>TS</sup></b>     | 20000         | 5000          | 100000        | 125000         | 586.3              | 2086                |
| <b>1S2S<sup>TS</sup></b>     | 20000         | 5000          | 100000        | 125000         | 600.1              | 4713                |

**Supplementary Table 2.** Extent of conformational sampling done on all diastereomeric transition states. Energies shown are the TSFF potential energies for the minimum energy conformers identified in each ensemble.

*ii) Example MacroModel conformational search command*

The following is an example MacroModel conformational search input file for diastereomeric transition state **1R2S<sup>TS</sup>**. Various combinations of MCMM, LMCS and LMC2 were used (this example shows MCMM).

```

c1r2s_004.mae
c1r2s_005.mae
MMOD      0      1      0      0      0.0000      0.0000      0.0000      0.0000
DEBG      55     179      0      0      0.0000      0.0000      0.0000      0.0000
SEED     40000      0      0      0      0.0000      0.0000      0.0000      0.0000
FFLD       2      1      0      0      1.0000      0.0000      0.0000      0.0000
EXNB       0      0      0      0      0.0000      0.0000      0.0000      0.0000
BDCC       0      0      0      0      89.4427 99999.0000      0.0000      0.0000
READ       0      0      0      0      0.0000      0.0000      0.0000      0.0000
CRMS       0      0      0      0      0.0000      0.5000      0.0000      0.0000
MCMM     10000      0      0      0      0.0000      0.0000      0.0000      0.0000
NANT       0      0      0      0      0.0000      0.0000      0.0000      0.0000
MCNV       1      5      0      0      0.0000      0.0000      0.0000      0.0000
MCSS       2      0      0      0      50.0000      0.0000      0.0000      0.0000
MCOP       1      0      0      0      0.5000      0.0000      0.0000      0.0000
DEMX       0     1000      0      0      50.0000     100.0000      0.0000      0.0000
COMP       1      2      3      4      0.0000      0.0000      0.0000      0.0000
COMP       5      6      7      8      0.0000      0.0000      0.0000      0.0000
COMP       9     12     13     14      0.0000      0.0000      0.0000      0.0000
COMP      15     16     17     20      0.0000      0.0000      0.0000      0.0000
COMP      21     22     23     24      0.0000      0.0000      0.0000      0.0000
COMP      25     28     29     30      0.0000      0.0000      0.0000      0.0000
COMP      31     32     33     48      0.0000      0.0000      0.0000      0.0000
COMP      49     50     51     52      0.0000      0.0000      0.0000      0.0000
COMP      53     55     56     58      0.0000      0.0000      0.0000      0.0000
COMP      59     60     61     62      0.0000      0.0000      0.0000      0.0000
COMP      63     69     70     71      0.0000      0.0000      0.0000      0.0000

```

|      |     |     |      |     |          |          |        |        |
|------|-----|-----|------|-----|----------|----------|--------|--------|
| COMP | 72  | 73  | 74   | 75  | 0.0000   | 0.0000   | 0.0000 | 0.0000 |
| COMP | 76  | 77  | 78   | 79  | 0.0000   | 0.0000   | 0.0000 | 0.0000 |
| COMP | 80  | 81  | 82   | 83  | 0.0000   | 0.0000   | 0.0000 | 0.0000 |
| COMP | 84  | 85  | 86   | 87  | 0.0000   | 0.0000   | 0.0000 | 0.0000 |
| COMP | 88  | 89  | 90   | 91  | 0.0000   | 0.0000   | 0.0000 | 0.0000 |
| COMP | 92  | 93  | 94   | 95  | 0.0000   | 0.0000   | 0.0000 | 0.0000 |
| COMP | 96  | 97  | 98   | 99  | 0.0000   | 0.0000   | 0.0000 | 0.0000 |
| COMP | 100 | 101 | 102  | 103 | 0.0000   | 0.0000   | 0.0000 | 0.0000 |
| COMP | 104 | 105 | 132  | 133 | 0.0000   | 0.0000   | 0.0000 | 0.0000 |
| MSYM | 0   | 0   | 0    | 0   | 0.0000   | 0.0000   | 0.0000 | 0.0000 |
| CHIG | 82  | 0   | 0    | 0   | 0.0000   | 0.0000   | 0.0000 | 0.0000 |
| AUOP | 0   | 0   | 0    | 0   | 100.0000 | 0.0000   | 0.0000 | 0.0000 |
| TORS | 1   | 133 | 0    | 0   | 0.0000   | 180.0000 | 0.0000 | 0.0000 |
| TORS | 2   | 7   | 0    | 0   | 0.0000   | 180.0000 | 0.0000 | 0.0000 |
| TORS | 2   | 15  | 0    | 0   | 0.0000   | 180.0000 | 0.0000 | 0.0000 |
| TORS | 2   | 48  | 0    | 0   | 0.0000   | 180.0000 | 0.0000 | 0.0000 |
| TORS | 3   | 23  | 0    | 0   | 0.0000   | 180.0000 | 0.0000 | 0.0000 |
| TORS | 3   | 31  | 0    | 0   | 0.0000   | 180.0000 | 0.0000 | 0.0000 |
| TORS | 3   | 48  | 0    | 0   | 0.0000   | 180.0000 | 0.0000 | 0.0000 |
| TORS | 3   | 132 | 0    | 0   | 0.0000   | 180.0000 | 0.0000 | 0.0000 |
| TORS | 48  | 52  | 0    | 0   | 0.0000   | 180.0000 | 0.0000 | 0.0000 |
| TORS | 48  | 56  | 0    | 0   | 0.0000   | 180.0000 | 0.0000 | 0.0000 |
| TORS | 50  | 51  | 0    | 0   | 0.0000   | 180.0000 | 0.0000 | 0.0000 |
| TORS | 50  | 77  | 0    | 0   | 0.0000   | 180.0000 | 0.0000 | 0.0000 |
| TORS | 51  | 52  | 0    | 0   | 0.0000   | 180.0000 | 0.0000 | 0.0000 |
| TORS | 52  | 53  | 0    | 0   | 0.0000   | 180.0000 | 0.0000 | 0.0000 |
| TORS | 52  | 84  | 0    | 0   | 0.0000   | 180.0000 | 0.0000 | 0.0000 |
| TORS | 53  | 61  | 0    | 0   | 0.0000   | 180.0000 | 0.0000 | 0.0000 |
| TORS | 69  | 71  | 0    | 0   | 0.0000   | 180.0000 | 0.0000 | 0.0000 |
| TORS | 70  | 80  | 0    | 0   | 0.0000   | 180.0000 | 0.0000 | 0.0000 |
| TORS | 71  | 72  | 0    | 0   | 0.0000   | 180.0000 | 0.0000 | 0.0000 |
| TORS | 72  | 74  | 0    | 0   | 0.0000   | 180.0000 | 0.0000 | 0.0000 |
| TORS | 73  | 89  | 0    | 0   | 0.0000   | 180.0000 | 0.0000 | 0.0000 |
| TORS | 74  | 76  | 0    | 0   | 0.0000   | 180.0000 | 0.0000 | 0.0000 |
| TORS | 76  | 77  | 0    | 0   | 0.0000   | 180.0000 | 0.0000 | 0.0000 |
| TORS | 78  | 79  | 0    | 0   | 0.0000   | 180.0000 | 0.0000 | 0.0000 |
| TORS | 80  | 81  | 0    | 0   | 0.0000   | 180.0000 | 0.0000 | 0.0000 |
| TORS | 81  | 82  | 0    | 0   | 0.0000   | 180.0000 | 0.0000 | 0.0000 |
| TORS | 82  | 83  | 0    | 0   | 0.0000   | 180.0000 | 0.0000 | 0.0000 |
| TORS | 82  | 86  | 0    | 0   | 0.0000   | 180.0000 | 0.0000 | 0.0000 |
| TORS | 83  | 84  | 0    | 0   | 0.0000   | 180.0000 | 0.0000 | 0.0000 |
| TORS | 86  | 90  | 0    | 0   | 0.0000   | 180.0000 | 0.0000 | 0.0000 |
| TORS | 132 | 133 | 0    | 0   | 0.0000   | 180.0000 | 0.0000 | 0.0000 |
| RCA4 | 52  | 48  | 49   | 50  | 0.5000   | 2.5000   | 0.0000 | 0.0000 |
| RCA4 | 52  | 53  | 56   | 48  | 0.5000   | 2.5000   | 0.0000 | 0.0000 |
| RCA4 | 71  | 69  | 70   | 80  | 0.5000   | 2.5000   | 0.0000 | 0.0000 |
| RCA4 | 133 | 1   | 2    | 48  | 0.5000   | 2.5000   | 0.0000 | 0.0000 |
| CONV | 2   | 0   | 0    | 0   | 0.0500   | 0.0000   | 0.0000 | 0.0000 |
| MINI | 1   | 0   | 2500 | 0   | 0.0000   | 0.0000   | 0.0000 | 0.0000 |

After the conformational searches were completed, redundant conformers were eliminated using the following MacroModel command file. The energies reported during conformational searches using MacroModel 2016 version 3 vary from the single point energies. This step ensures that the energies reported in the output file match the single point energy calculations.

```
clr2s_005.mae
clr2s_005_opt.mae
```

|      |   |   |      |   |        |        |        |        |
|------|---|---|------|---|--------|--------|--------|--------|
| MMOD | 0 | 1 | 0    | 0 | 0.0000 | 0.0000 | 0.0000 | 0.0000 |
| FFLD | 2 | 1 | 0    | 0 | 1.0000 | 0.0000 | 0.0000 | 0.0000 |
| BGIN | 0 | 0 | 0    | 0 | 0.0000 | 0.0000 | 0.0000 | 0.0000 |
| READ | 0 | 0 | 0    | 0 | 0.0000 | 0.0000 | 0.0000 | 0.0000 |
| COMP | 0 | 0 | 0    | 0 | 0.0000 | 0.0000 | 0.0000 | 0.0000 |
| MINI | 9 | 0 | 2500 | 0 | 0.0000 | 0.0000 | 0.0000 | 0.0000 |
| END  | 0 | 0 | 0    | 0 | 0.0000 | 0.0000 | 0.0000 | 0.0000 |

### iii) Hydrogen bonding in diastereomeric TSs

For each minimum energy conformer obtained from the full sampling, the hydrogen bonding within the oligopeptide was analyzed using Chimera. The hydrogen bonds present during the 2<sup>nd</sup>, 3<sup>rd</sup> and 4<sup>th</sup> hydrogenation are shown below.

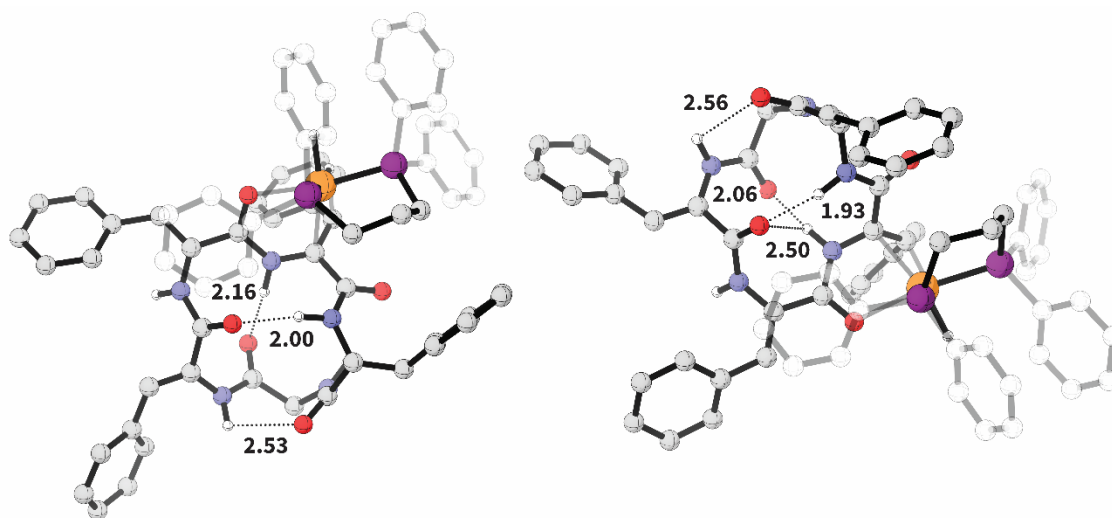

**Supplementary Figure 9.** Hydrogen bonding in *pro-syn* **1R2R**<sup>TS</sup> (left) and *pro-anti* **1R2S**<sup>TS</sup> (right). There is an additional 2.50 Å interior hydrogen bond in the *pro-anti* transition state. The other two interior hydrogen bonds are also shorter in the *pro-anti* transition state.

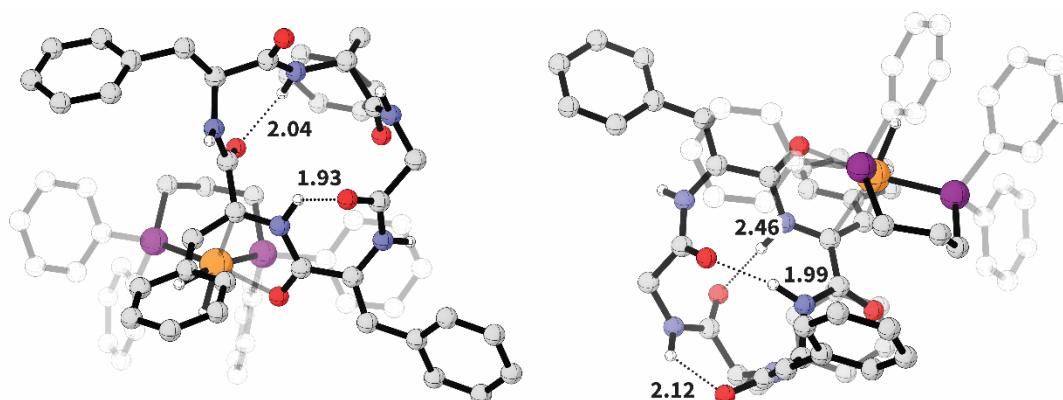

**Supplementary Figure 10.** Hydrogen bonding in *pro-syn* **1R2S3S<sup>TS</sup>** (left) and *pro-anti* **1R2S3R<sup>TS</sup>** (right). There is an additional exterior hydrogen bond in the *pro-anti* transition state, and the interior hydrogens bonds are also shorter in this diastereomer.

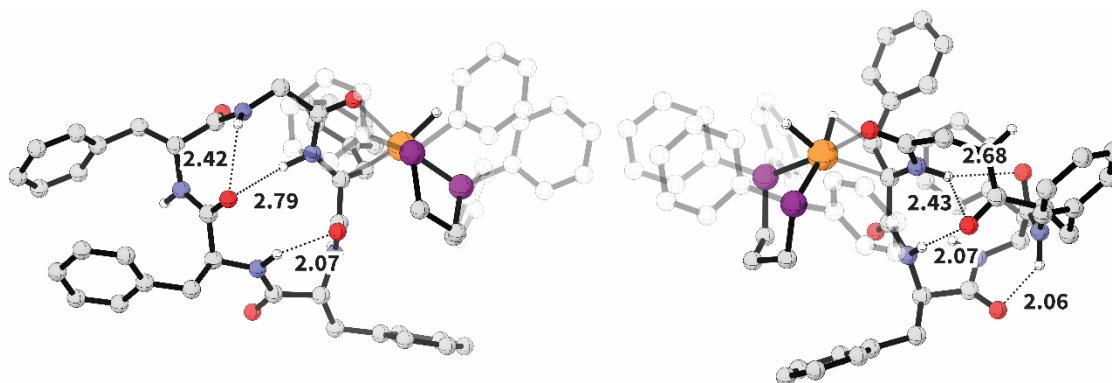

**Supplementary Figure 11.** Hydrogen bonding in *pro-syn* **1R2S3R4R<sup>TS</sup>** (left) and *pro-anti* **1R2S3R4S<sup>TS</sup>** (right). There is an additional exterior hydrogen bond in the *pro-anti* diastereomer.

#### *iv) Details of QM calculations*

Clustering was done on **1R<sup>TS</sup>**, **2R<sup>TS</sup>**, **3R<sup>TS</sup>**, **4R<sup>TS</sup>**, **1R2R<sup>TS</sup>** and **1R2S<sup>TS</sup>** (Supplementary Figure 8) to narrow down the conformational space to 5 representative conformers for each ensemble. Each of these representative conformers was fully optimized to a transition state using G09 and B3LYP/LANL2DZ/6-31G\* with Grimme's empirical dispersion.<sup>18</sup> Transition states were confirmed using harmonic frequency analysis. All 5 representatives were optimized to QM transition states for every conformer besides **1R<sup>TS</sup>**, for which only 4 transition states could be located. The coordinates, energies and frequencies are found in Supplementary Tables 3-31 in the

additional information file (.doc) under the supplementary information. Energies are reported in hartrees.

## 8) Additional Experiments

### *i) Synthesis of pentapeptide 8*

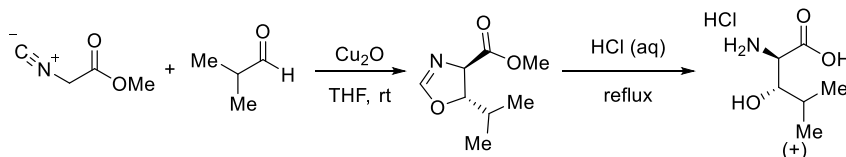

### **(±)-(2R,3R)-2-amino-3-hydroxy-4-methylpentanoic acid (S17)**

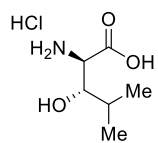

In a nitrogen-filled glovebox, to a round bottom flask equipped with a stir bar was added isobutyl aldehyde (0.48 mL, 5.25 mmol), Cu<sub>2</sub>O (10 mol%), and THF (20 mL) at rt. Methyl isocyanoacetate (0.45 mL, 5.0 mmol) was then added. The solution was a brown suspension, and it was stirred for 12 h. The solution was concentrated under reduced pressure to give a beige solid. The solid filtered through a short plug of silica gel to remove Cu. The solid was concentrated under reduced pressure to give the oxazoline, which was used in the next step without further purification.

To the oxazoline (5 mmol) at rt was added 6 N aqueous HCl (25 mL). The solution was heated to reflux and stirred for 22 h. The solution was cooled to room temperature and was concentrated under reduced pressure to give **S17** as a beige solid (845 mg, 92%). Characterization data was consistent with those previously reported.<sup>19</sup>

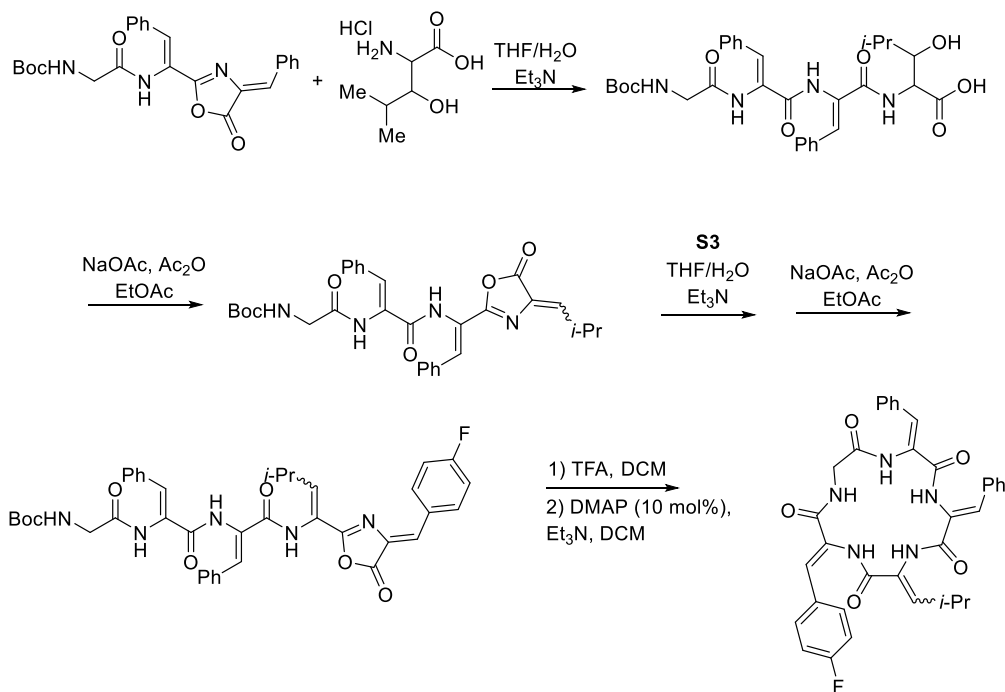

***tert*-butyl (2-(((1*Z*)-3-(((1*Z*)-1-(4-(2-methylpropylidene)-5-oxo-4,5-dihydrooxazol-2-yl)-2-phenylvinyl)amino)-3-oxo-1-phenylprop-1-en-2-yl)amino)-2-oxoethyl)carbamate (S18)**

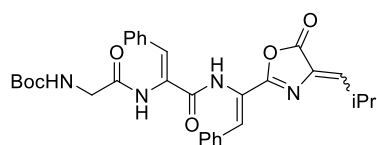

To a solution of **S17** (492 mg, 2.68 mmol) in THF/H<sub>2</sub>O (1:1, 0.1 M) was added triethylamine (621  $\mu$ L, 4.46 mmol) and the mixture was sonicated until homogeneous. The mixture was added to a solution of oxazolone **3** (1.00 g, 2.23 mmol) in THF (22 mL). The reaction was stirred at rt for 36 h. The mixture was acidified with 10% KHSO<sub>4</sub> (aq), extracted with 3x with EtOAc, and the organic layer was washed with brine. The organic layer was dried over anhydrous Na<sub>2</sub>SO<sub>4</sub> and concentrated under reduced pressure to afford the desired carboxylic acid which was used without further purification.

To a round bottom flask equipped with a stir bar was added the carboxylic acid (2.23 mmol) and EtOAc (5.0 mL). To this solution was added acetic anhydride (2.10 mL, 22.3 mmol) and sodium acetate (366 mg, 4.46 mmol) and the mixture was stirred at rt for 18 h. Sat. NaHCO<sub>3</sub> (aq) was added to quench excess acetic anhydride and acetic acid until the reaction mixture stopped bubbling. The mixture was extracted 3x with EtOAc and the combined organic layer was washed with brine and dried over anhydrous Na<sub>2</sub>SO<sub>4</sub>. The solution was filtered and solvent was evaporated under reduced pressure. The oil was dissolved in a minimal amount of DCM and hexanes was added to precipitate the oxazolone. The solvent was decanted and the solid was washed 2x with

hexanes to afford the desired oxazolone **S18** as a light yellow solid (1.2 g, 92%, 4:1 *dr*).  $^1\text{H}$  NMR (500 MHz,  $\text{CDCl}_3$ )  $\delta$  8.40 (br, 0.13H), 8.24 (br, 0.64H), 7.87 (br, 0.17H), 7.85 (br, 0.67H), 7.69-7.64 (m, 2H), 7.47-7.31 (m, 10H), 6.58 (d,  $J = 11.0$  Hz, 0.17H), 6.48 (d,  $J = 9.9$  Hz, 1H), 5.29 (br, 1H), 3.87 (d,  $J = 4.6$  Hz, 1.65H), 3.83 (br, 0.42H), 3.56-3.64 (m, 0.16H), 3.16-3.28 (m, 0.78H), 1.37 (s, 9H), 1.15 (d,  $J = 6.6$  Hz, 5.63H), 1.09 (d,  $J = 6.7$  Hz, 1.23H).  $^{13}\text{C}$  NMR (125 MHz,  $\text{CDCl}_3$ )  $\delta$  169.9, 169.6, 166.0, 164.6, 164.3, 164.2, 161.6, 160.4, 156.7, 151.4, 146.1, 134.3, 134.2, 133.5, 133.4, 133.3, 133.2, 131.8, 130.8, 130.3, 129.8, 129.7, 129.1, 129.0, 128.9, 127.5, 127.0, 119.8, 81.1, 45.1, 28.6, 28.4, 26.9, 22.5, 22.1. IR (ATR): 3270, 2974, 1812, 1668, 1630, 1563, 1496, 1367, 1250, 1216, 1165, 1029, 751, 733, 690  $\text{cm}^{-1}$ . HRMS (ESI-TOF)  $m/z$  calc'd for  $\text{C}_{31}\text{H}_{34}\text{N}_4\text{O}_6\text{Na}$   $[\text{M}+\text{Na}]^+$ : 581.2376, found: 581.2388.

**9,12-di((Z)-benzylidene)-3-((Z)-4-fluorobenzylidene)-6-(2-methylpropylidene)-1,4,7,10,13-pentaazacyclopentadecane-2,5,8,11,14-pentaone (8)**

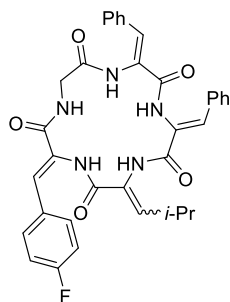

To a solution of **S3** (591 mg, 2.51 mmol) in THF/ $\text{H}_2\text{O}$  (1:1, 0.1 M) was added triethylamine (350  $\mu\text{L}$ , 2.51 mmol) and the mixture was sonicated until homogeneous. The mixture was added to a solution of oxazolone **S18** (1.00 g, 1.79 mmol) in THF (18 mL). The reaction was stirred at rt for 24 h. The mixture was acidified with 10%  $\text{KHSO}_4$  (aq), extracted with 3x with EtOAc, and the organic layer was washed with brine. The organic layer was dried over

anhydrous  $\text{Na}_2\text{SO}_4$  and concentrated under reduced pressure to afford the desired carboxylic acid which was used without further purification.

To a round bottom flask equipped with a stir bar was added the carboxylic acid (1.79 mmol) and EtOAc (3.6 mL). To this solution was added acetic anhydride (1.70 mL, 17.9 mmol) and sodium acetate (294 mg, 3.58 mmol) and the mixture was stirred at rt for 40 h. Sat.  $\text{NaHCO}_3$  (aq) was added to quench excess acetic anhydride and acetic acid until the reaction mixture stopped bubbling. The mixture was extracted 3x with EtOAc and the combined organic layer was washed with brine and dried over anhydrous  $\text{Na}_2\text{SO}_4$ . The solution was filtered and solvent was evaporated under reduced pressure. The oil was dissolved in a minimal amount of DCM and hexanes was added to precipitate the oxazolone. The solvent was decanted and the solid was washed 2x with hexanes to afford the desired oxazolone as a light yellow solid which was used in the next step without further purification.

To a round bottom flask equipped with a stir bar under N<sub>2</sub> was added the corresponding oxazolone (1.79 mmol) and anhydrous DCM (18 mL). The reaction mixture was cooled to 0 °C and TFA (2.74 mL, 35.8 mmol) was slowly added. The reaction slowly warmed to rt and stirred for 3 h. The DCM was concentrated under reduced pressure and to the mixture was added toluene to form a TFA azeotrope, which was subsequently concentrated under reduced pressure. The crude reaction mixture was further dried on the high vacuum and subsequently triturated with Et<sub>2</sub>O to afford TFA·amine salt and was immediately used in the next reaction without further purification.

TFA·amine salt (1.79 mmol) was dissolved in anhydrous DCM (36 mL, 0.05 M) and to this solution was added anhydrous Et<sub>3</sub>N (1.00 mL, 7.16 mmol) and DMAP (22 mg, 0.18 mmol). The reaction mixture was stirred at rt for 7 h and subsequently concentrated under reduced pressure. The crude reaction mixture was then purified via column chromatography (eluting with 80% EtOAc/hexanes) to afford cyclic pentapeptide **8** as a light yellow solid (170 mg, 15% yield over 4 steps, 8:1 *Z/E* at ΔLeu). <sup>1</sup>H NMR (600 MHz, DMSO, 373 K) δ 9.41 (s, 1H), 9.36 (s, 1H), 9.13 (s, 1H), 9.02 (s, 1H), 8.05 (s, 1H), 7.61 – 7.53 (m, 6H), 7.44 – 7.38 (m, 5H), 7.38 – 7.34 (m, 3H), 7.29 (s, 1H), 7.21 – 7.16 (m, 4H), 7.06 (s, 1H), 6.17 (d, *J* = 9.8 Hz, 1H), 3.97 (d, *J* = 5.2 Hz, 2H), 2.77 – 2.70 (m, 1H), 1.07 (d, *J* = 6.6 Hz, 6H). <sup>13</sup>C NMR (151 MHz, DMSO, 373 K) δ 169.2, 165.4, 164.7, 163.7, 161.6 (d, *J* = 247.5 Hz), 140.2, 133.9, 133.3, 131.1 (d, *J* = 8.3 Hz), 130.5 (d, *J* = 3.2 Hz), 129.4, 129.12, 129.07, 128.4, 128.3, 128.2, 128.02, 127.98, 127.8, 127.7, 127.5, 127.4, 127.0, 114.6 (d, *J* = 21.6 Hz), 43.4, 26.4, 21.2. <sup>19</sup>F NMR (376 MHz, DMSO, 373 K) δ -112.44. IR (ATR): 3072, 2960, 2915, 1640, 1506, 1221 cm<sup>-1</sup>. HRMS (ESI-TOF) *m/z* calc'd for C<sub>35</sub>H<sub>24</sub>FN<sub>5</sub>O<sub>5</sub>Na [M+Na]<sup>+</sup>: 644.2285, found: 644.2273.

ii) SPPS syntheses

**(3*S*,6*S*,9*R*,12*S*)-9,12-dibenzyl-3-(4-fluorobenzyl)-6-isobutyl-1,4,7,10,13-pentaazacyclopentadecane-2,5,8,11,14-pentaone (9b)**

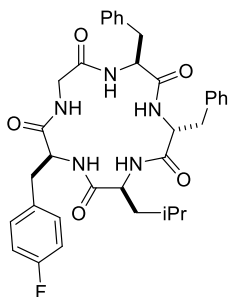

The corresponding linear pentapeptide was manually synthesized via Fmoc solid phase peptide synthesis (SPPS) using 2-chlorotrityl chloride (CTC) resin (substitution 1.1 mmol/g). The resin (0.360 g, 0.400 mmol) was swelled in DMF (peptide grade) (20 mL) for 20 min. The beads were washed once with DMF. DMF (10 mL), Fmoc-Phe(4-F)-OH (649 mg, 1.60 mmol) and *i*-Pr<sub>2</sub>EtN (2.5 mL) were added and allowed to mix under N<sub>2</sub> for 15 minutes. The coupling with Fmoc-Phe(4-F)-OH was repeated again. After the double coupling, the beads were washed with DMF and the Fmoc group was deprotected with 20% 4-methylpiperidine in DMF (20 mL) for 15 minutes. This deprotection was repeated again. The resin was washed three times with DMF (15 mL) and a Kaiser test was performed to determine presence of deprotected amine. The beads were washed once with *N*-methyl-2-pyrrolidone (15 mL). To begin the next coupling, NMP (10 mL), Fmoc-L-Leu-OH (620 mg, 1.6 mmol), HBTU (610 mg, 1.6 mmol), and *i*-Pr<sub>2</sub>EtN (2.5 mL) were added and the resin bubbled under N<sub>2</sub> for 30 min. The completion of the coupling was monitored by the Kaiser test. If incomplete, the coupling step was repeated again. The resin was washed three times with DMF (15 mL). The deprotection of the Fmoc group was repeated as above two times. To elongate the peptide, the coupling and deprotection steps were performed with Fmoc-D-Phe-OH, Fmoc-Phe-OH, and Fmoc-Gly-OH. After the last amino acid was deprotected, the beads were washed three times with DMF. To the resin was added 40 mL cleavage solution (95% TFA, 2.5% H<sub>2</sub>O, 2.5% triisopropylsilane), and the resin bubbled under N<sub>2</sub> for 3 h. A new receiving flask was replaced on the peptide synthesizer and the TFA was drained into the new flask. The TFA solution containing the linear pentapeptide (0.400 mmol) was concentrated under reduced pressure. Then to the same round bottom flask equipped with a stir bar was added HOAt (136 mg, 1.00 mmol), and DMF (400 mL). The reaction mixture was cooled to 0 °C and *i*-Pr<sub>2</sub>EtN (1.40 mL, 8.00 mmol) was added. HATU (760 mg, 2.00 mmol) was added in portions and the reaction warmed to rt and stirred for 12 h. The solvent was concentrated under reduced pressure and a white solid formed. This solid was then filtered and triturated with DCM, MeOH, and Et<sub>2</sub>O to afford the title compound as a white solid (69 mg, 27% overall). <sup>1</sup>H NMR (400 MHz, DMSO)

$\delta$  8.65 – 8.58 (m, 1H), 8.52 (d,  $J$  = 7.2 Hz, 1H), 8.20 (d,  $J$  = 8.5 Hz, 1H), 7.77 (d,  $J$  = 8.8 Hz, 1H), 7.52 (d,  $J$  = 7.9 Hz, 1H), 7.28 – 7.01 (m, 14H), 4.62 – 4.52 (m, 1H), 4.43 – 4.31 (m, 2H), 4.03 (dd,  $J$  = 14.1, 7.4 Hz, 1H), 3.99 – 3.89 (m, 1H), 3.07 – 2.86 (m, 3H), 2.79 – 2.67 (m, 3H), 1.36 – 1.23 (m, 2H), 1.23 – 1.14 (m, 1H), 0.71 (d,  $J$  = 6.6 Hz, 3H), 0.60 (d,  $J$  = 6.4 Hz, 3H).  $^{13}\text{C}$  NMR (151 MHz, DMSO)  $\delta$  171.87, 171.19, 170.72, 170.52, 169.52, 160.91 (d,  $J$  = 241.7 Hz), 137.57, 137.03, 133.75 (d,  $J$  = 2.8 Hz), 130.94 (d,  $J$  = 7.9 Hz), 129.03, 129.00, 128.09, 128.06, 126.28, 126.23, 114.79 (d,  $J$  = 21.0 Hz), 54.79, 54.02, 53.25, 52.17, 43.73, 37.40, 36.33, 35.95, 23.66, 22.96, 20.94.  $^{19}\text{F}$  NMR (376 MHz, DMSO)  $\delta$  -117.22. IR (ATR): 3072, 3033, 2966, 1635, 1534, 1501, 1221  $\text{cm}^{-1}$ . HRMS (ESI-TOF)  $m/z$  calc'd for  $\text{C}_{35}\text{H}_{40}\text{FN}_5\text{O}_5\text{Na}$   $[\text{M}+\text{Na}]^+$ : 652.2911, found: 652.2906.  $[\alpha]_D^{23}$  -37 ( $c$  = 0.33, DMF).

**(3S,6R,9S,12R)-9,12-dibenzyl-3-(4-fluorobenzyl)-6-isobutyl-1,4,7,10,13-pentaazacyclopentadecane-2,5,8,11,14-pentaone (9c)**

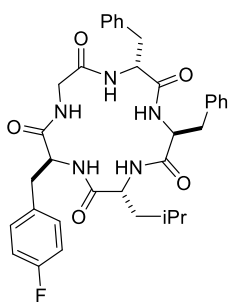

The corresponding linear pentapeptide was manually synthesized via Fmoc solid phase peptide synthesis (SPPS) using 2-chlorotrityl chloride (CTC) resin (substitution 1.1 mmol/g). The resin (0.360 g, 0.400 mmol) was swelled in DMF (peptide grade) (20 mL) for 20 min. The beads were washed once with DMF. DMF (10 mL), Fmoc-Phe(4-F)-OH (649 mg, 1.60 mmol) and *i*-Pr<sub>2</sub>EtN (2.5 mL) were added and allowed to mix under N<sub>2</sub> for 15 minutes. The

coupling with Fmoc-Phe(4-F)-OH was repeated again. After the double coupling, the beads were washed with DMF and the Fmoc group was deprotected with 20% 4-methylpiperidine in DMF (20 mL) for 15 minutes. This deprotection was repeated again. The resin was washed three times with DMF (15 mL) and a Kaiser test was performed to determine presence of deprotected amine. The beads were washed once with *N*-methyl-2-pyrrolidone (15 mL). To begin the next coupling, NMP (10 mL), Fmoc-D-Leu-OH (620 mg, 1.6 mmol), HBTU (610 mg, 1.6 mmol), and *i*-Pr<sub>2</sub>EtN (2.5 mL) were added and the resin bubbled under N<sub>2</sub> for 30 min. The completion of the coupling was monitored by the Kaiser test. If incomplete, the coupling step was repeated again. The resin was washed three times with DMF (15 mL). The deprotection of the Fmoc group was repeated as above two times. To elongate the peptide, the coupling and deprotection steps were performed with Fmoc-Phe-OH, Fmoc-D-Phe-OH, and Fmoc-Gly-OH. After the last amino acid was deprotected, the beads were washed three times with DMF. To the resin was added 40 mL cleavage solution (95% TFA, 2.5% H<sub>2</sub>O, 2.5% triisopropylsilane), and the resin bubbled under N<sub>2</sub> for 3 h. A new

receiving flask was replaced on the peptide synthesizer and the TFA was drained into the new flask. The TFA solution containing the linear pentapeptide (0.400 mmol) was concentrated under reduced pressure. Then to the same round bottom flask equipped with a stir bar was added HOAt (136 mg, 1.00 mmol), and DMF (400 mL). The reaction mixture was cooled to 0 °C and *i*-Pr<sub>2</sub>EtN (1.40 mL, 8.00 mmol) was added. HATU (760 mg, 2.00 mmol) was added in portions and the reaction warmed to rt and stirred for 12 h. The solvent was concentrated under reduced pressure and a white solid formed. This solid was then filtered and triturated with DCM, MeOH, and Et<sub>2</sub>O to afford the title compound as a white solid (112 mg, 45% overall). <sup>1</sup>H NMR (400 MHz, DMSO) δ 8.79 (d, *J* = 7.3 Hz, 1H), 8.37 (d, *J* = 8.8 Hz, 1H), 8.21 (t, *J* = 5.6 Hz, 1H), 7.85 (d, *J* = 7.9 Hz, 1H), 7.78 (d, *J* = 7.6 Hz, 1H), 7.29 – 6.97 (m, 14H), 4.55 – 4.44 (m, 1H), 4.42 – 4.35 (m, 1H), 4.32 – 4.22 (m, 2H), 3.67 (dd, *J* = 15.1, 5.7 Hz, 1H), 3.55 (dd, *J* = 15.3, 5.2 Hz, 1H), 3.04 – 2.85 (m, 3H), 2.83 – 2.65 (m, 3H), 1.33 – 1.14 (m, 2H), 1.12 – 1.03 (m, 1H), 0.77 (d, *J* = 6.5 Hz, 3H), 0.71 (d, *J* = 6.5 Hz, 3H). <sup>13</sup>C NMR (151 MHz, DMSO) δ 172.4, 171.2, 171.0, 170.5, 168.6, δ 161.0 (d, *J* = 241.9 Hz), 137.7, 133.9 (d, *J* = 2.8 Hz), 130.9 (d, *J* = 8.0 Hz), 129.4, 129.2, 128.9, 128.7, 128.1, 128.0, 126.1, 114.8 (d, *J* = 21.1 Hz), 55.3, 54.1, 53.3, 51.1, 43.3, 40.6, 35.8, 35.4, 35.0, 23.9, 22.4, 22.3. <sup>19</sup>F NMR (376 MHz, DMSO) δ -117.20. IR (ATR): 3083, 3027, 2960, 1640, 1545, 1501, 1221 cm<sup>-1</sup>. HRMS (ESI-TOF) *m/z* calc'd for C<sub>35</sub>H<sub>40</sub>FN<sub>5</sub>O<sub>5</sub>Na [M+Na]<sup>+</sup>: 652.2911, found: 652.2939. [α]<sub>D</sub><sup>24</sup> +29 (*c* = 0.23, DMF).

**(3*S*,6*S*,9*S*,12*S*)-9,12-dibenzyl-3-(4-fluorobenzyl)-6-isobutyl-1,4,7,10,13-pentaazacyclopentadecane-2,5,8,11,14-pentaone (S19)**

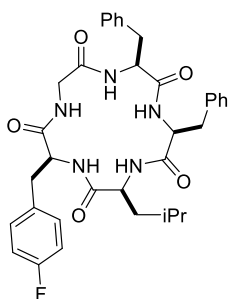

The corresponding linear pentapeptide was manually synthesized via Fmoc solid phase peptide synthesis (SPPS) using 2-chlorotrityl chloride (CTC) resin (substitution 1.1 mmol/g). The resin (0.360 g, 0.400 mmol) was swelled in DMF (peptide grade) (20 mL) for 20 min. The beads were washed once with DMF. DMF (10 mL), Fmoc-Phe(4-F)-OH (649 mg, 1.60 mmol) and *i*-Pr<sub>2</sub>EtN (2.5 mL) were added and allowed to mix under N<sub>2</sub> for 15 minutes. The

coupling with Fmoc-Phe(4-F)-OH was repeated again. After the double coupling, the beads were washed with DMF and the Fmoc group was deprotected with 20% 4-methylpiperidine in DMF (20 mL) for 15 minutes. This deprotection was repeated again. The resin was washed three times with DMF (15 mL) and a Kaiser test was performed to determine presence of deprotected amine. The

beads were washed once with *N*-methyl-2-pyrrolidone (15 mL). To begin the next coupling, NMP (10 mL), Fmoc-Leu-OH (620 mg, 1.6 mmol), HBTU (610 mg, 1.6 mmol), and *i*-Pr<sub>2</sub>EtN (2.5 mL) were added and the resin bubbled under N<sub>2</sub> for 30 min. The completion of the coupling was monitored by the Kaiser test. If incomplete, the coupling step was repeated again. The resin was washed three times with DMF (15 mL). The deprotection of the Fmoc group was repeated as above two times. To elongate the peptide, the coupling and deprotection steps were performed with Fmoc-Phe-OH, Fmoc-Phe-OH, and Fmoc-Gly-OH. After the last amino acid was deprotected, the beads were washed three times with DMF. To the resin was added 40 mL cleavage solution (95% TFA, 2.5% H<sub>2</sub>O, 2.5% triisopropylsilane), and the resin bubbled under N<sub>2</sub> for 3 h. A new receiving flask was replaced on the peptide synthesizer and the TFA was drained into the new flask. The TFA solution containing the linear pentapeptide (0.400 mmol) was concentrated under reduced pressure. Then to the same round bottom flask equipped with a stir bar was added HOAt (136 mg, 1.00 mmol), and DMF (400 mL). The reaction mixture was cooled to 0 °C and *i*-Pr<sub>2</sub>EtN (1.40 mL, 8.00 mmol) was added. HATU (760 mg, 2.00 mmol) was added in portions and the reaction warmed to rt and stirred for 12 h. The solvent was concentrated under reduced pressure and a white solid formed. This solid was then filtered and triturated with DCM, MeOH, and Et<sub>2</sub>O to afford the title compound as a white solid (23 mg, 9% overall). The <sup>1</sup>H-NMR spectrum was consistent with the cyclic pentapeptide **9a** obtained after hydrogenation (Supplementary Figure 16 and 17).

*iii) Analysis of timepoint (t=15 min) for asymmetric hydrogenation of 5a' using Duanphos to probe sequential cascade hydrogenation*

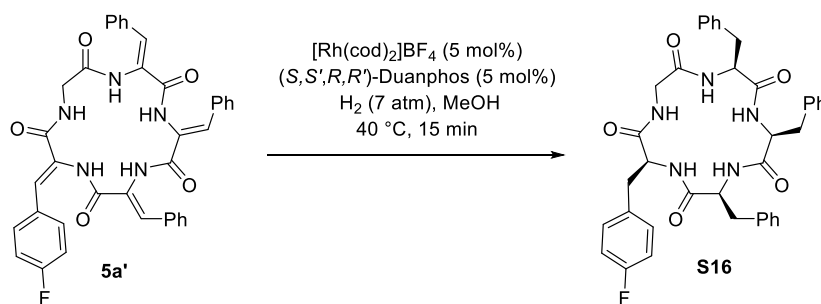

Cyclic dehydropeptide **5a'** (5.0 mg, 0.0076 mmol) was subjected to the Rh-catalyzed hydrogenation using method B. After 15 min, LC-MS and <sup>19</sup>F-NMR analysis (Supplementary Figure 12) for the asymmetric hydrogenation of **5a'** showed formation of product at 117.17 ppm and two additional unsaturated intermediates.

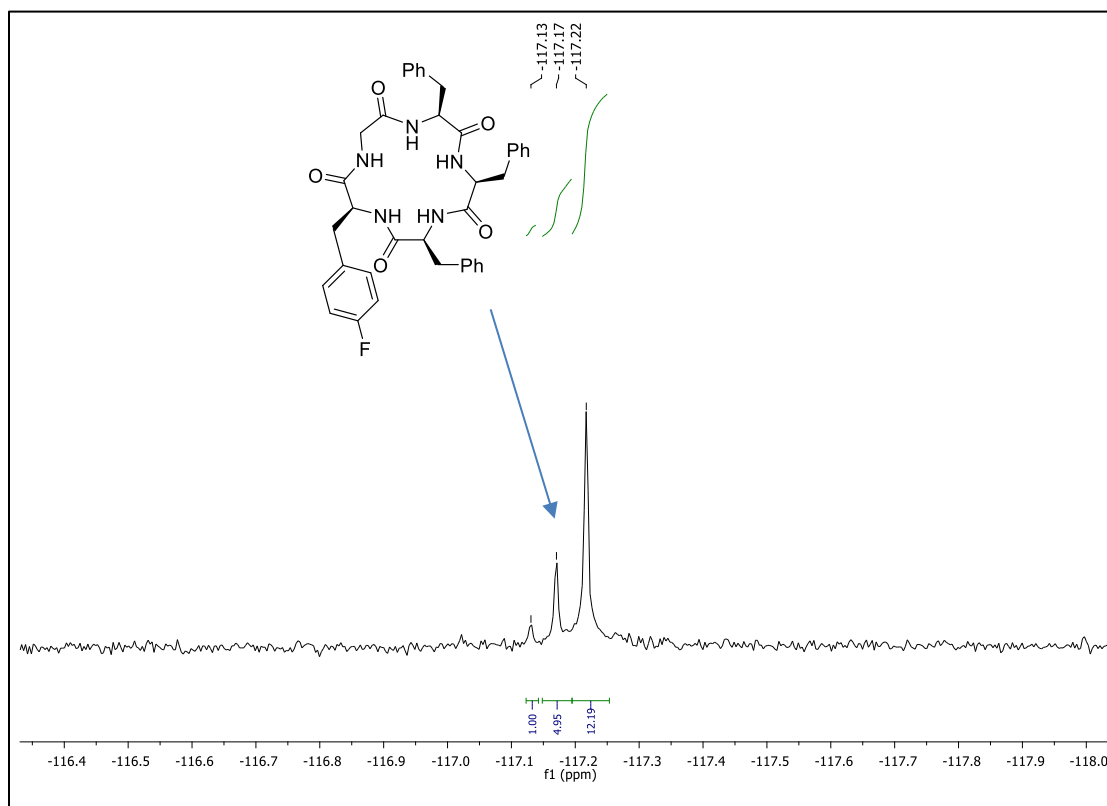

**Supplementary Figure 12.**  $^{19}\text{F}$ -NMR at t=15 min for asymmetric hydrogenation of **5a'** using Duanphos

LC-MS analysis for the asymmetric hydrogenation of **5a'** (t=15 min) showed formation of product. The product is represented by major peaks,  $m/z = 664.35$  ( $\text{M}+\text{H}$ ) and  $686.42$  ( $\text{M}+\text{Na}$ ) (Supplementary Figure 13).

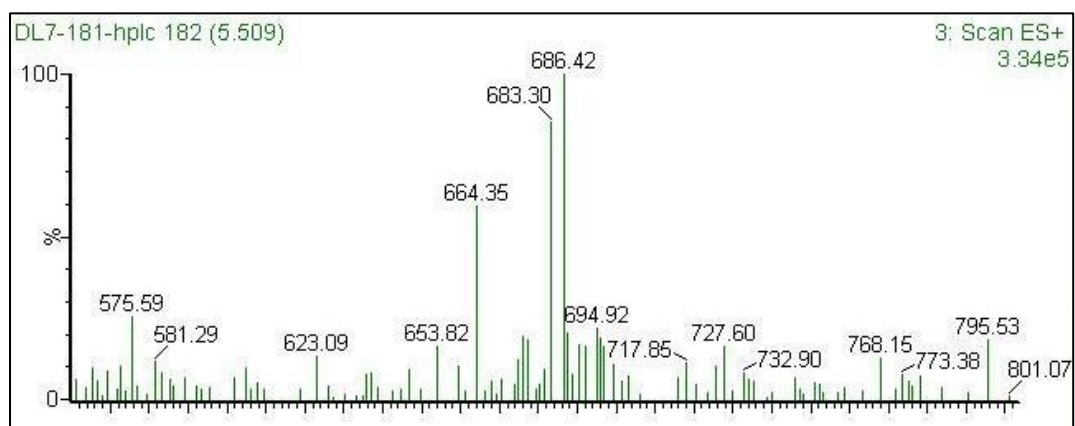

**Supplementary Figure 13.** LC-MS analysis for asymmetric hydrogenation of **5a'** using Duanphos for product formation.

LC-MS analysis for the asymmetric hydrogenation of **5a'** (t=15 min) showed the mass for the tri-hydrogenated intermediate. This intermediate is represented by major peaks,  $m/z = 662.71$  (M+H) and 684.08 (M+Na) (Supplementary Figure 14).

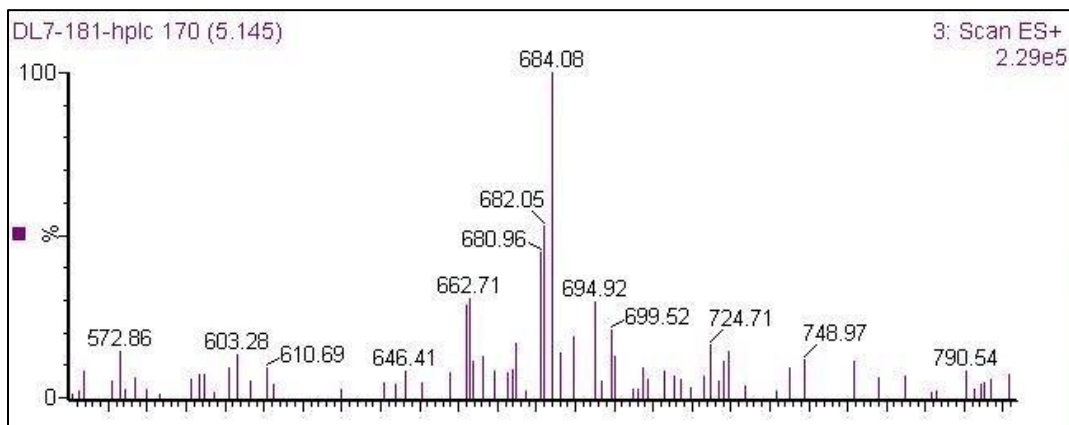

**Supplementary Figure 14.** LC-MS analysis for asymmetric hydrogenation of **5a'** using Duanphos for tri-hydrogenated intermediate.

LC-MS analysis for the asymmetric hydrogenation of **5a'** (t=15 min) showed the mass for the di-hydrogenated intermediate. This intermediate is represented by major peaks,  $m/z = 660.37$  (M+H) and 682.36 (M+Na) (Supplementary Figure 15).

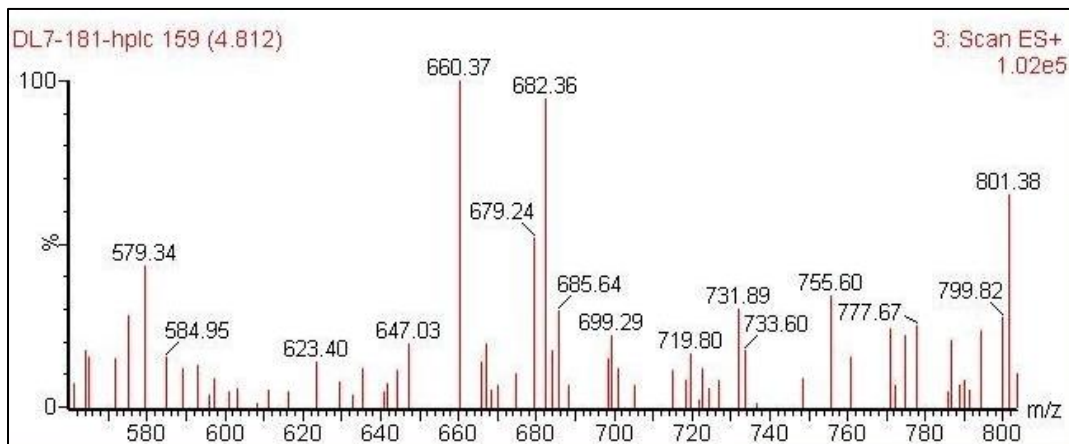

**Supplementary Figure 15.** LC-MS analysis for asymmetric hydrogenation of **5a'** using Duanphos for di-hydrogenated intermediate.

*Calculation of number of possible diastereomers for intermediates in asymmetric hydrogenation of cyclic dehydropeptide **5a'***

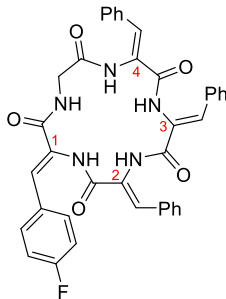

Because it is possible to see the different diastereomers via  $^{19}\text{F}$ -NMR, we will list off the possibilities comprised of one set of enantiomers below:

**n = number of enamides reduced**

**n = 1**

$1^S$   
 $2^S$   
 $3^S$   
 $4^S$

After n=1 reduction, we would see a possibility of 4 diastereomers via  $^{19}\text{F}$ -NMR.

**n = 2**

$1^S-2^S$   
 $1^S-2^R$   
 $1^S-3^S$   
 $1^S-3^R$   
 $1^S-4^S$   
 $1^S-4^R$   
 $2^S-3^S$   
 $2^S-3^R$   
 $2^S-4^S$   
 $2^S-4^R$   
 $3^S-4^S$   
 $3^S-4^R$

After n=2 reductions, we would see a possibility of 12 diastereomers via  $^{19}\text{F}$ -NMR.

**n = 3**

1<sup>S</sup>-2<sup>S</sup>-3<sup>S</sup>  
1<sup>S</sup>-2<sup>R</sup>-3<sup>S</sup>  
1<sup>S</sup>-2<sup>S</sup>-3<sup>R</sup>  
1<sup>S</sup>-2<sup>R</sup>-3<sup>R</sup>  
1<sup>S</sup>-2<sup>S</sup>-4<sup>S</sup>  
1<sup>S</sup>-2<sup>R</sup>-4<sup>S</sup>  
1<sup>S</sup>-2<sup>S</sup>-4<sup>R</sup>  
1<sup>S</sup>-2<sup>R</sup>-4<sup>R</sup>  
1<sup>S</sup>-3<sup>S</sup>-4<sup>S</sup>  
1<sup>S</sup>-3<sup>R</sup>-4<sup>S</sup>  
1<sup>S</sup>-3<sup>S</sup>-4<sup>R</sup>  
1<sup>S</sup>-3<sup>R</sup>-4<sup>R</sup>  
2<sup>S</sup>-3<sup>S</sup>-4<sup>S</sup>  
2<sup>S</sup>-3<sup>R</sup>-4<sup>S</sup>  
2<sup>S</sup>-3<sup>S</sup>-4<sup>R</sup>  
2<sup>S</sup>-3<sup>R</sup>-4<sup>R</sup>

After n=3 reductions, we would see a possibility of 16 diastereomers via <sup>19</sup>F-NMR.

Thus, in total we would see a maximum of 32 intermediates via <sup>19</sup>F-NMR for the for asymmetric hydrogenation of cyclic dehydropeptide **5a'** if the process were random and non-sequential. If the process were sequential, we would see a maximum of 3 intermediates. Because we observe the di- and tri-hydrogenated masses via LC-MS analysis, and only see two intermediates via <sup>19</sup>F-NMR, we conclude that the Duanphos reaction likely proceeds through a sequential reduction.

*iv) Asymmetric hydrogenation of cyclic dehydropeptide 8*

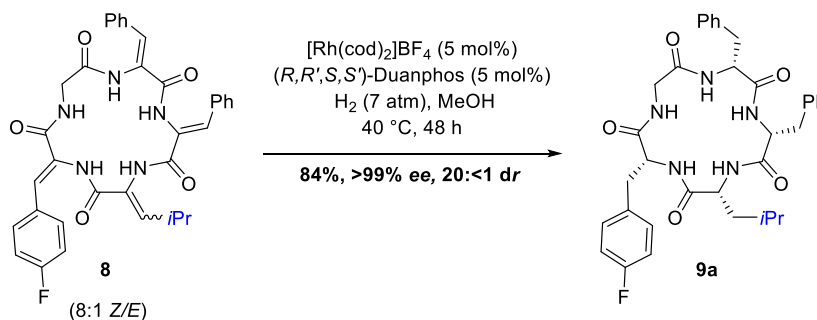

**(3R,6R,9R,12R)-9,12-dibenzyl-3-(4-fluorobenzyl)-6-isobutyl-1,4,7,10,13-pentaazacyclopentadecane-2,5,8,11,14-pentaone (9a)**

Cyclic dehydropeptide **8** (6.3 mg, 0.010 mmol) was subjected to the Rh-catalyzed hydrogenation using method B. After 48 h, the reaction went to full conversion to product via LC-MS analysis

and *dr* was determined to be 20:<1 *dr* via  $^{19}\text{F}$ -NMR. After preparative thin layer chromatography (eluting with 95:5 DCM/MeOH), the product was obtained as a white solid (5.3 mg, 84%, >99% *ee*).  $^1\text{H}$  NMR (400 MHz, DMSO)  $\delta$  8.58 (t,  $J = 5.5$  Hz, 1H), 8.29 – 8.14 (m, 3H), 7.90 (d,  $J = 8.1$  Hz, 1H), 7.32 – 7.13 (m, 12H), 7.08 (m, 2H), 4.36 (dd,  $J = 14.8, 8.6$  Hz, 1H), 4.32 – 4.23 (m, 2H), 3.94 (dd,  $J = 14.5, 6.4$  Hz, 1H), 3.80 (dd,  $J = 14.9, 7.6$  Hz, 1H), 3.23 (dd,  $J = 14.2, 4.8$  Hz, 1H), 3.11 – 2.97 (m, 3H), 2.97 – 2.84 (m, 2H), 2.77 (dd,  $J = 13.7, 9.6$  Hz, 1H), 1.70 – 1.58 (m, 1H), 1.42 – 1.32 (m, 1H), 1.26 – 1.13 (m, 1H), 0.78 (d,  $J = 6.5$  Hz, 3H), 0.72 (d,  $J = 6.4$  Hz, 3H).  $^{13}\text{C}$  NMR (151 MHz, DMSO)  $\delta$  172.05, 171.44, 170.58, 170.53, 169.12, 160.93 (d,  $J = 241.8$  Hz), 137.71, 137.39, 133.97 (d,  $J = 2.6$  Hz), 130.92 (d,  $J = 8.0$  Hz), 129.04, 128.85, 128.21, 128.16, 126.34, 114.73 (d,  $J = 21.0$  Hz), 56.10, 55.70, 54.44, 54.03, 43.28, 36.86, 36.48, 35.98, 24.14, 22.63, 21.57.  $^{19}\text{F}$  NMR (376 MHz, DMSO)  $\delta$  -117.27. IR (ATR): 3072, 2977, 1635, 1506, 1210  $\text{cm}^{-1}$ . HRMS (ESI-TOF)  $m/z$  calc'd for  $\text{C}_{35}\text{H}_{40}\text{FN}_5\text{O}_5\text{Na}$   $[\text{M}+\text{Na}]^+$ : 652.2911, found: 652.2912.  $[\alpha]_D^{27} +39$  ( $c = 0.27$ , DMF).

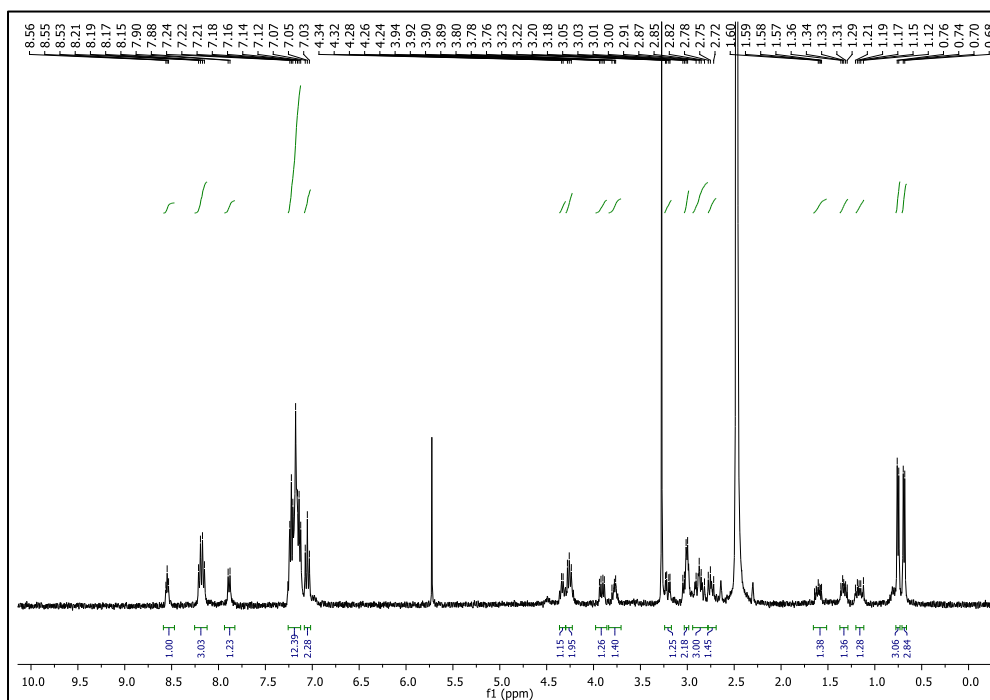

**Supplementary Figure 16.**  $^1\text{H}$ -NMR of cyclic pentapeptide **S19** made via SPPS

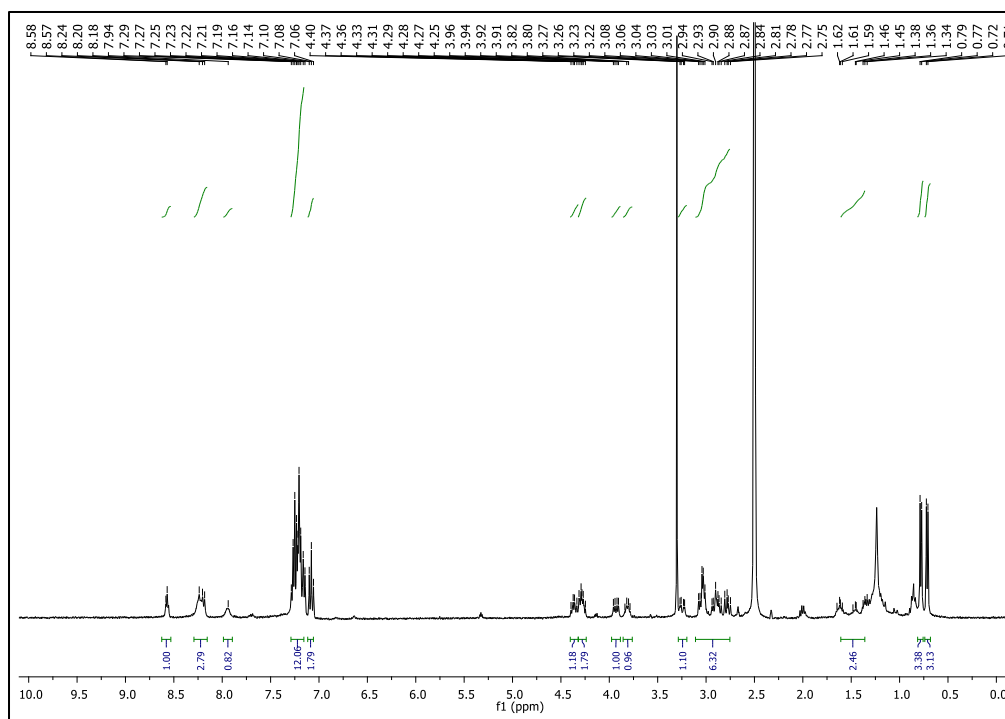

**Supplementary Figure 17.**  $^1\text{H}$ -NMR of cyclic pentapeptide **9a** after hydrogenation using (*R,R'*,*S,S'*)-Duanphos

Column: IC, 40% MeOH isocratic, thermostat set to 44 °C, sample prepared in 1:1 DCM/MeOH

1. Authentic Cyclo(Gly-L-Phe-L-Phe-L-Leu-L-Phe(4-F)) (**S19**) made from SPPS synthesis

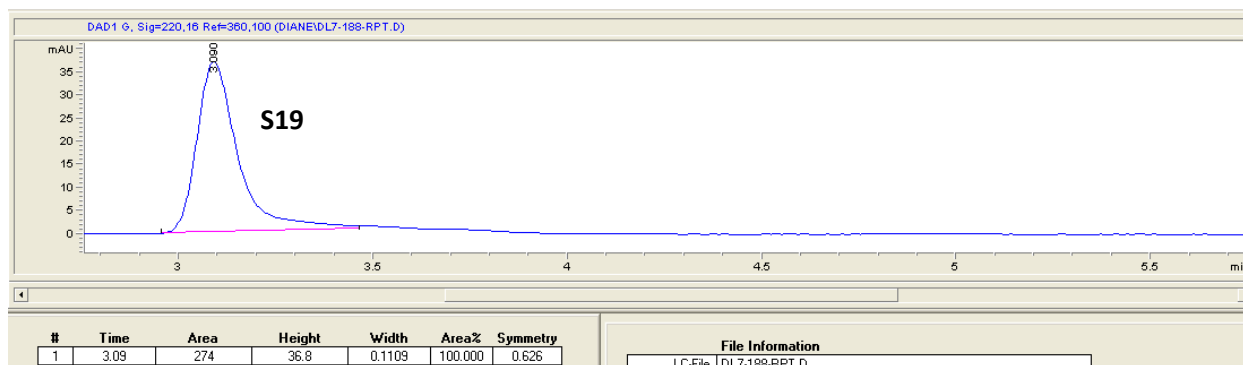

## 2. Cyclic peptide **S19** and cyclic peptide **9a**

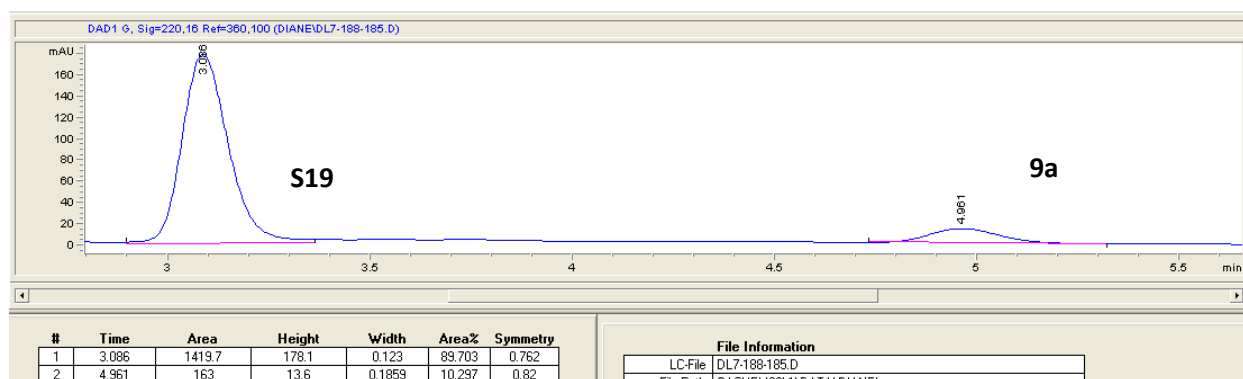

## 3. **9a** made from hydrogenation of **8** using (*R,R'*,*S,S'*)-Duanphos

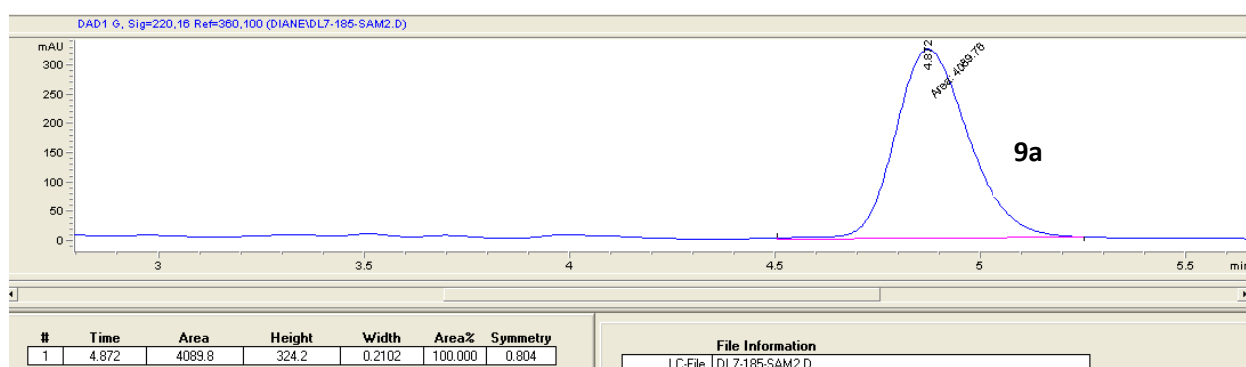

### v) Additional substrate

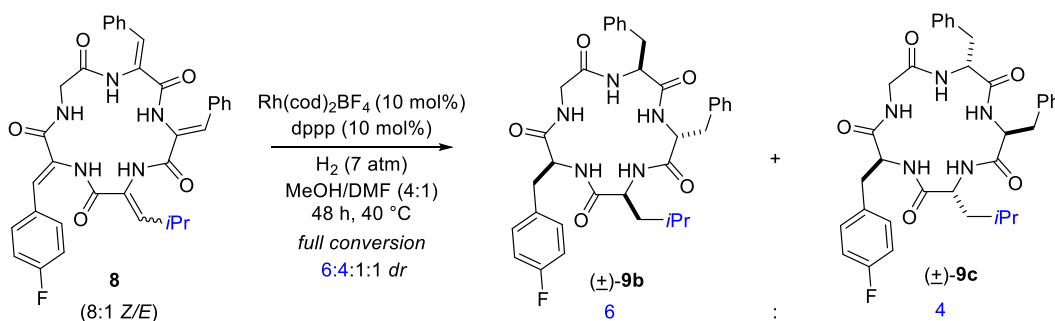

**Supplementary Figure 18.** Demonstrating hydrogenation of cyclic dehydropeptide **8** bearing non-aromatic side chain using Rh-dppp catalyst

Cyclic dehydropeptide **8** (6.3 mg, 0.010 mmol) was subjected to the Rh-catalyzed hydrogenation using method B. After 48 h, the reaction went to full conversion to product via LC-MS analysis and *dr* was determined to be 6:4:1:1 via  $^{19}\text{F}$ -NMR (Supplementary Figure 18). The major diastereomers were determined to be **(±)-9b** and **(±)-9c** through synthesis of authentic material via

SPPS. The  $^1\text{H}$ -NMR and  $^{19}\text{F}$ -NMR of the unpurified reaction mixture is shown in Supplementary Figure 19 and 20 with comparison to the authentic sample.

*Analysis:* Given that the side chains of leucine and phenylalanine are similar in size,<sup>20</sup> substituting the Ph for an *i*Pr group in cyclic dehydropeptide **8** emphasizes the importance of  $\pi$ -stacking for the stereoselectivity of the reaction. Further studies are underway to understand the impact of dehydroleucine on the stereocontrol of the cascade hydrogenation.

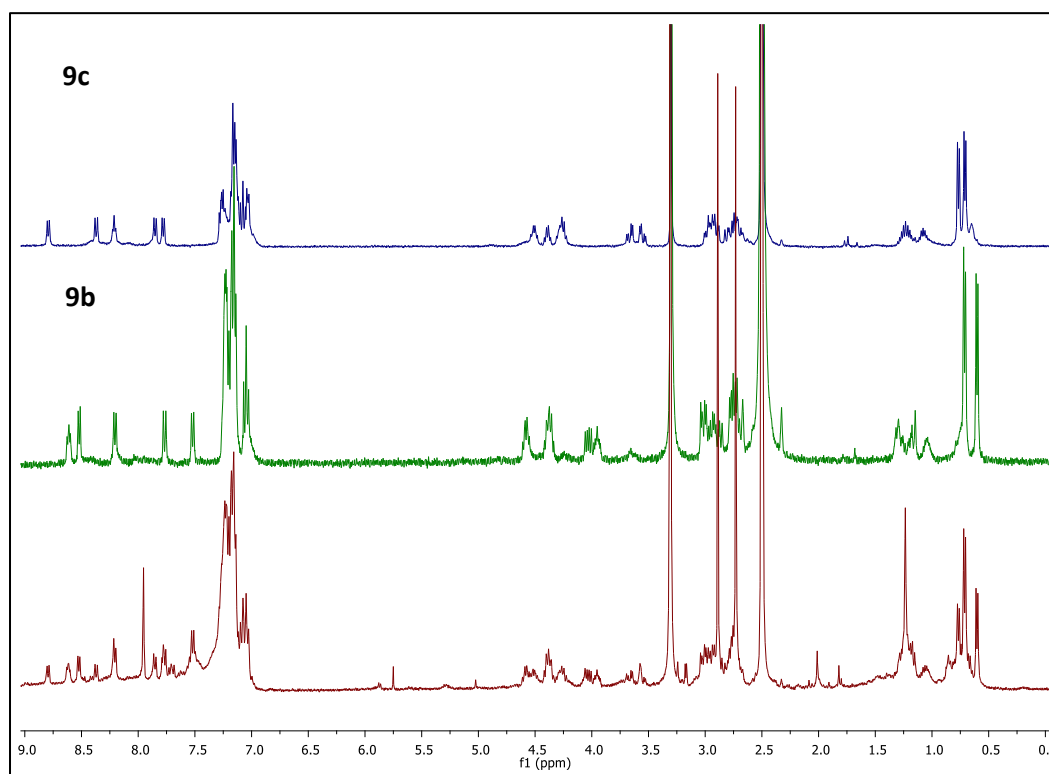

**Supplementary Figure 19.**  $^1\text{H}$ -NMR analysis for hydrogenation of **8** using dppp ligand. Blue spectrum represents authentic sample of **9c**, green spectrum represents authentic sample of **9b**, red spectrum represents spectrum of unpurified reaction mixture.

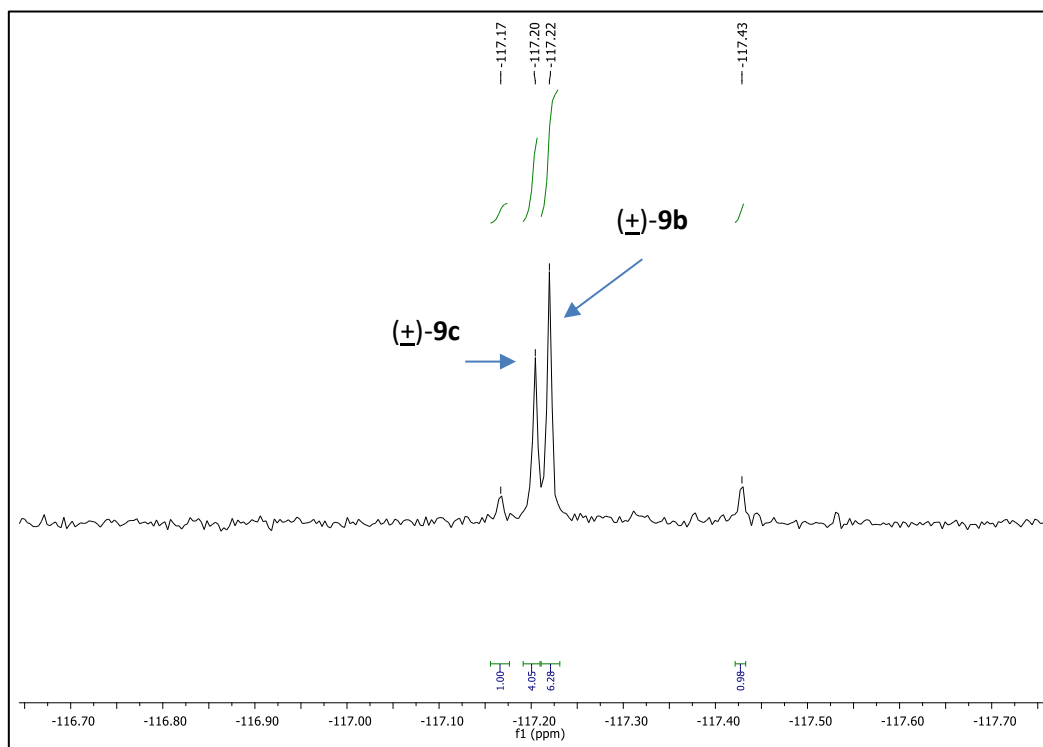

**Supplementary Figure 20.**  $^{19}\text{F}$ -NMR analysis of unpurified reaction mixture for hydrogenation of **8**.

*vi) Experiment to probe reversibility of Rh-catalyzed hydrogenation*

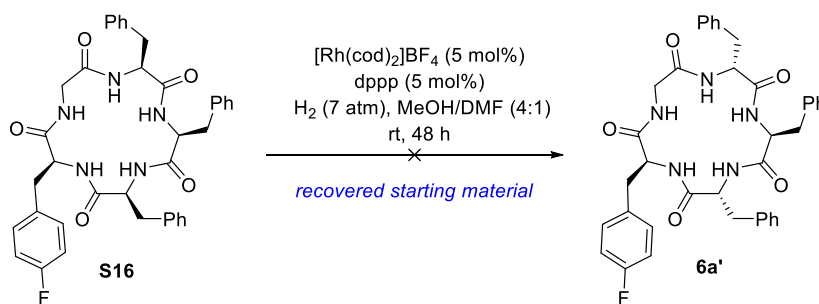

Cyclic peptide **S16** (6.6 mg, 0.010 mmol) was subjected to the Rh-catalyzed hydrogenation using method B. After 48 h, no desired product formation was observed and **S16** was recovered quantitatively.

vii) *Supplemental explanation of initial regioselectivity*

Here we present a supplemental approach to addressing the question of why the initial hydrogenation at  $\Delta\text{Phe}_1$  is favored over  $\Delta\text{Phe}_4$ , i.e. why the *N*-terminal rather than the *C*-terminal is preferred. In the key hydride transfer transition state, the Rh catalyst coordinates to both the carbonyl and the olefin of the reacting enamide. The ideal geometry in this transition state, as determined by DFT calculations and the TSFF fitted to them,<sup>10</sup> can be expressed as a skipped dihedral as shown below and has an optimal value of  $57^\circ$  (Supplementary Figure 21).

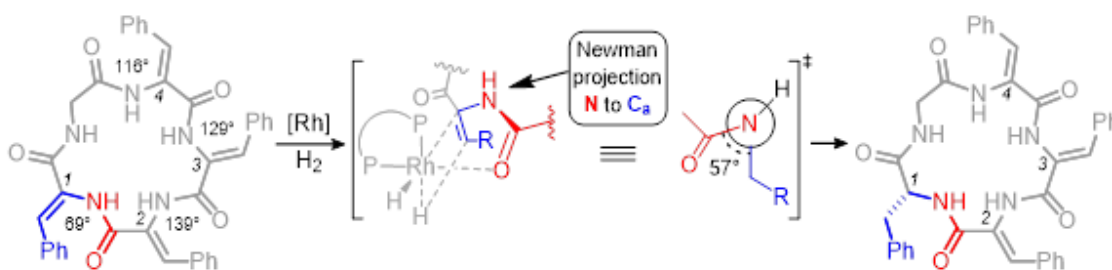

**Supplementary Figure 21.** Depiction of the ideal value of the skipped dihedral at the transition state.

Shown below in Supplementary Figure 22 are the results from a Monte Carlo conformational search of the substrate using the MM3\* force field in analogy to the studies described above. The value of the skipped dihedral is plotted against the potential energy. It can be seen that for  $\Delta\text{Phe}_1$ , there are several low-energy conformations values for the skipped dihedral close to the optimal geometry for catalyst binding ( $57^\circ$ , marked by red circle) while there are none for  $\Delta\text{Phe}_4$ . As a consequence of this additional conformational strain in the transition state-like geometry for the hydrogenation at  $\Delta\text{Phe}_4$ , the initial reaction at this position is disfavored.

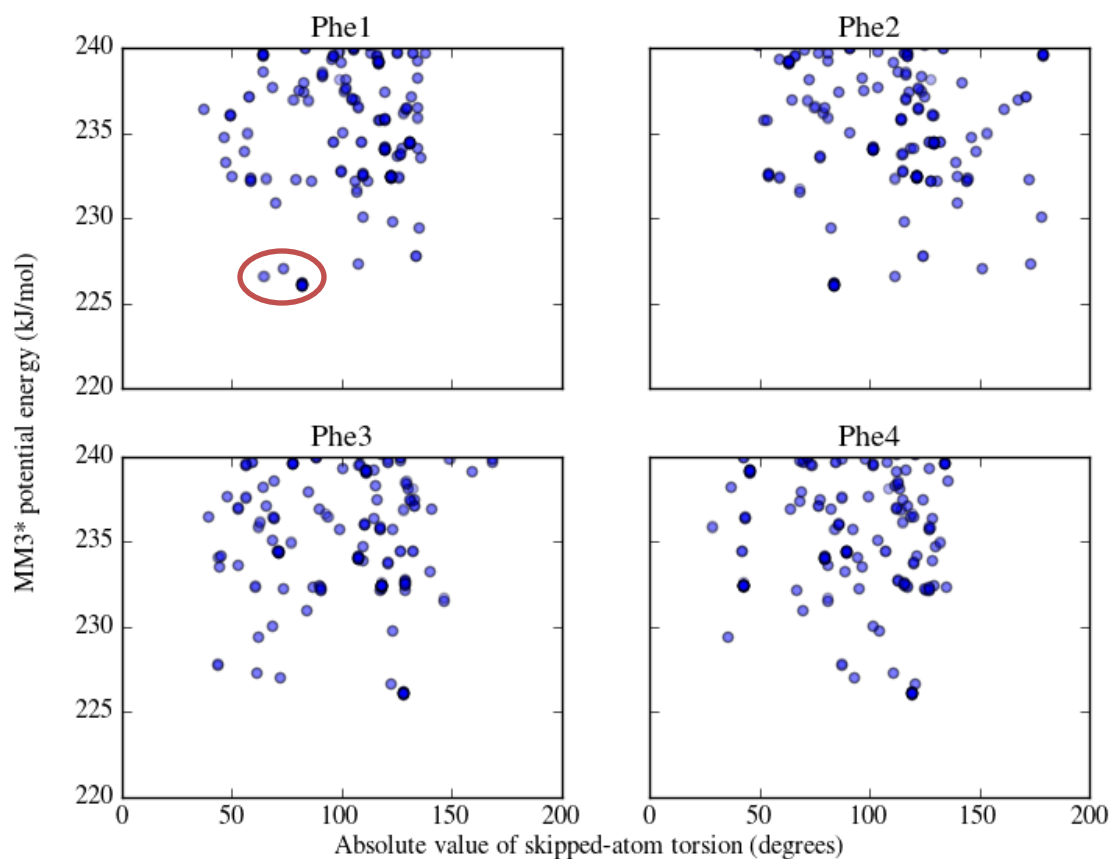

**Supplementary Figure 22.** Results from the Monte Carlo conformational search of the substrate. For skipped dihedral  $\Delta\text{Phe}_1$ , there is a cluster of low energy conformers with values of about  $57^\circ$ , the optimal geometry for catalyst binding.

## 9) NMR Spectra

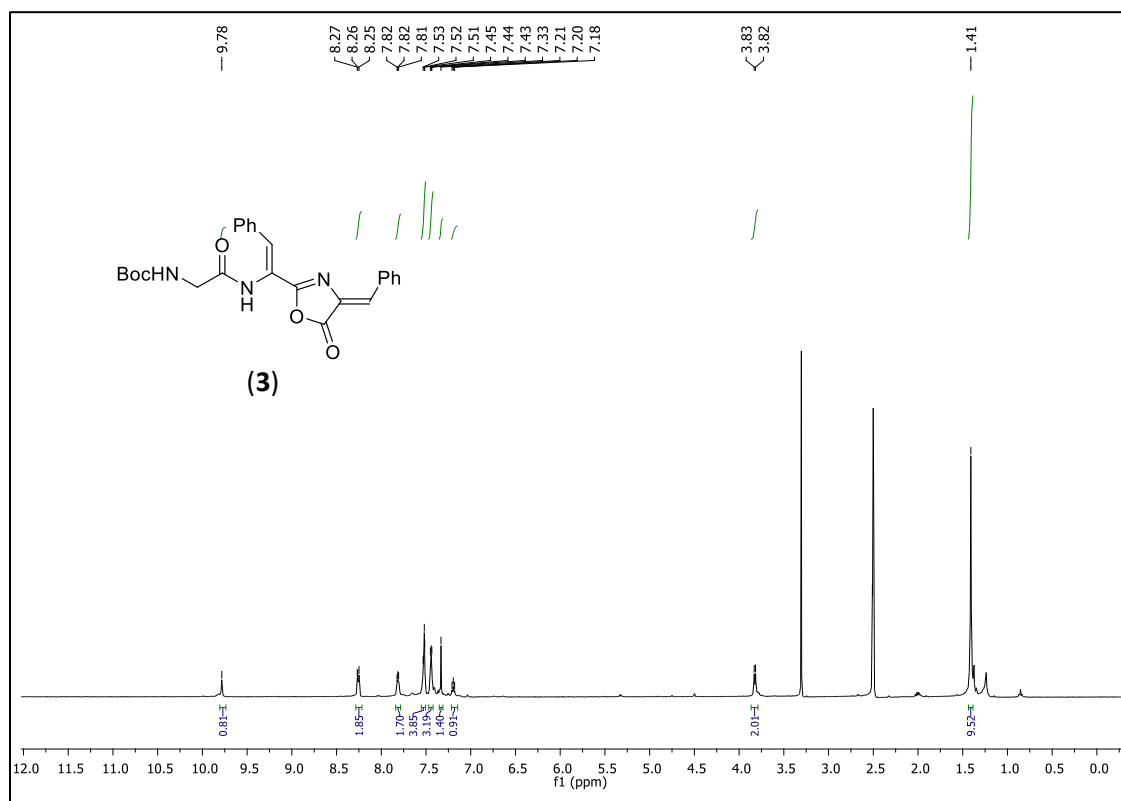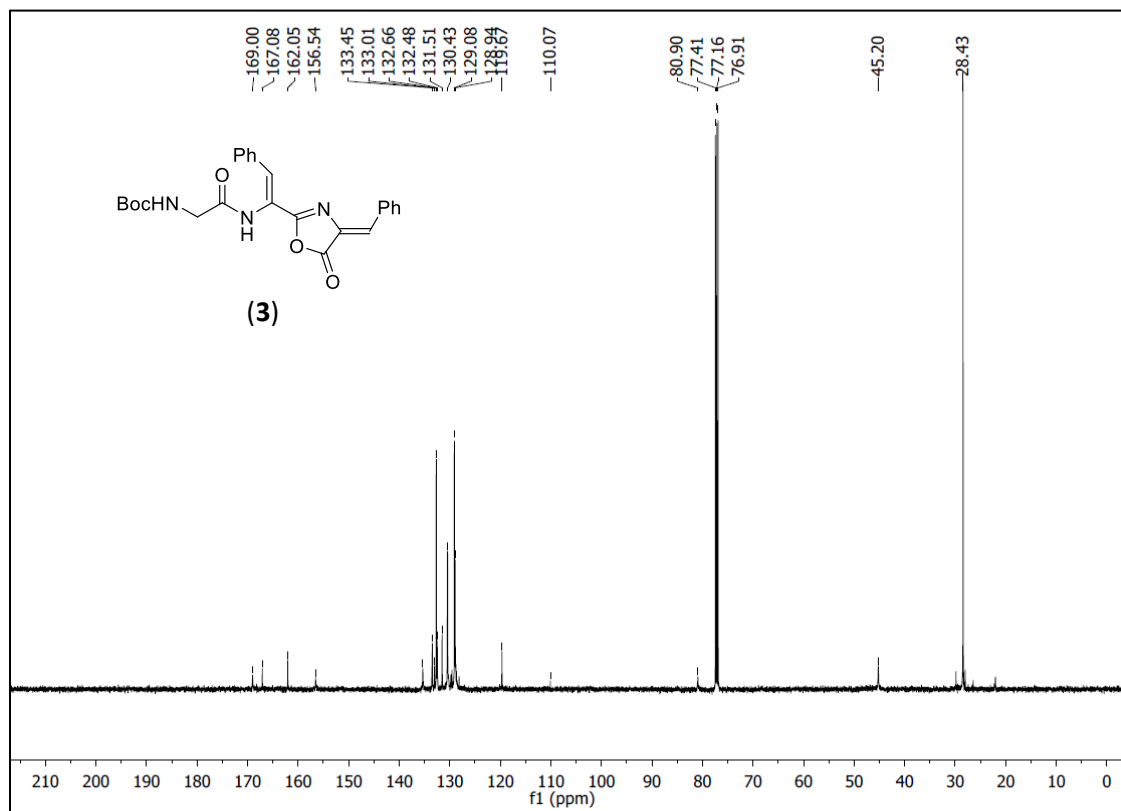

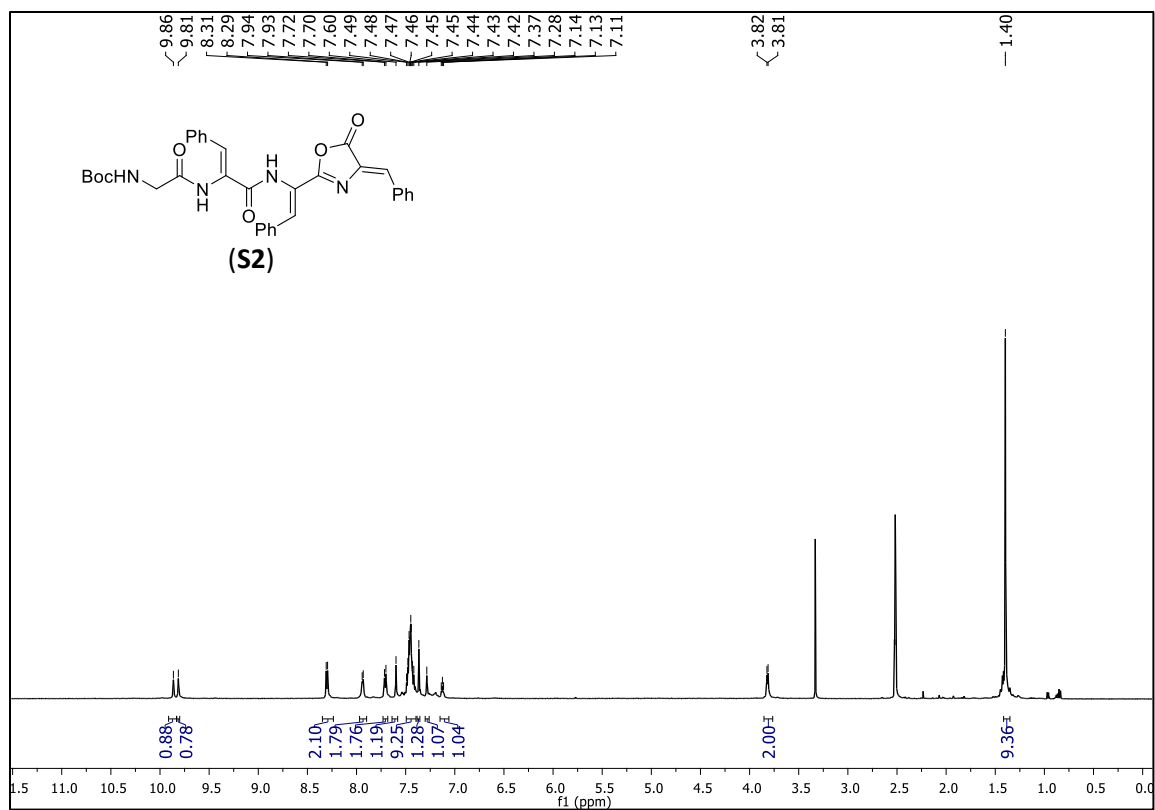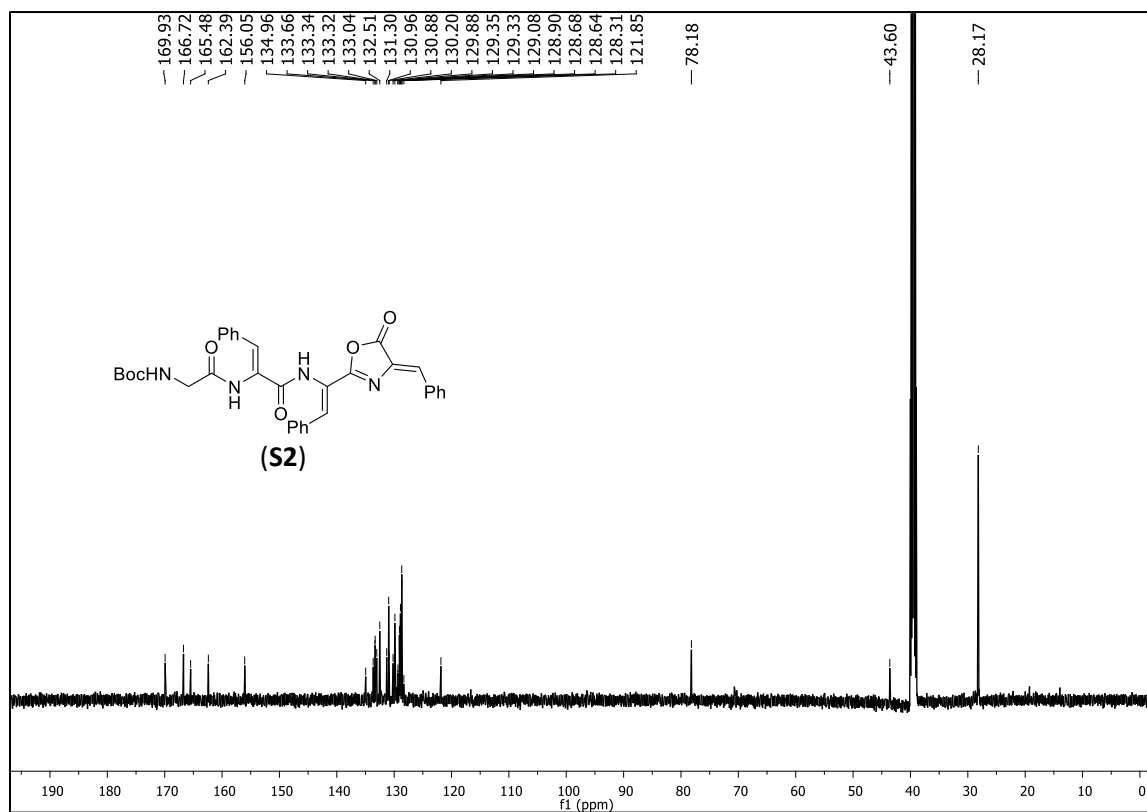

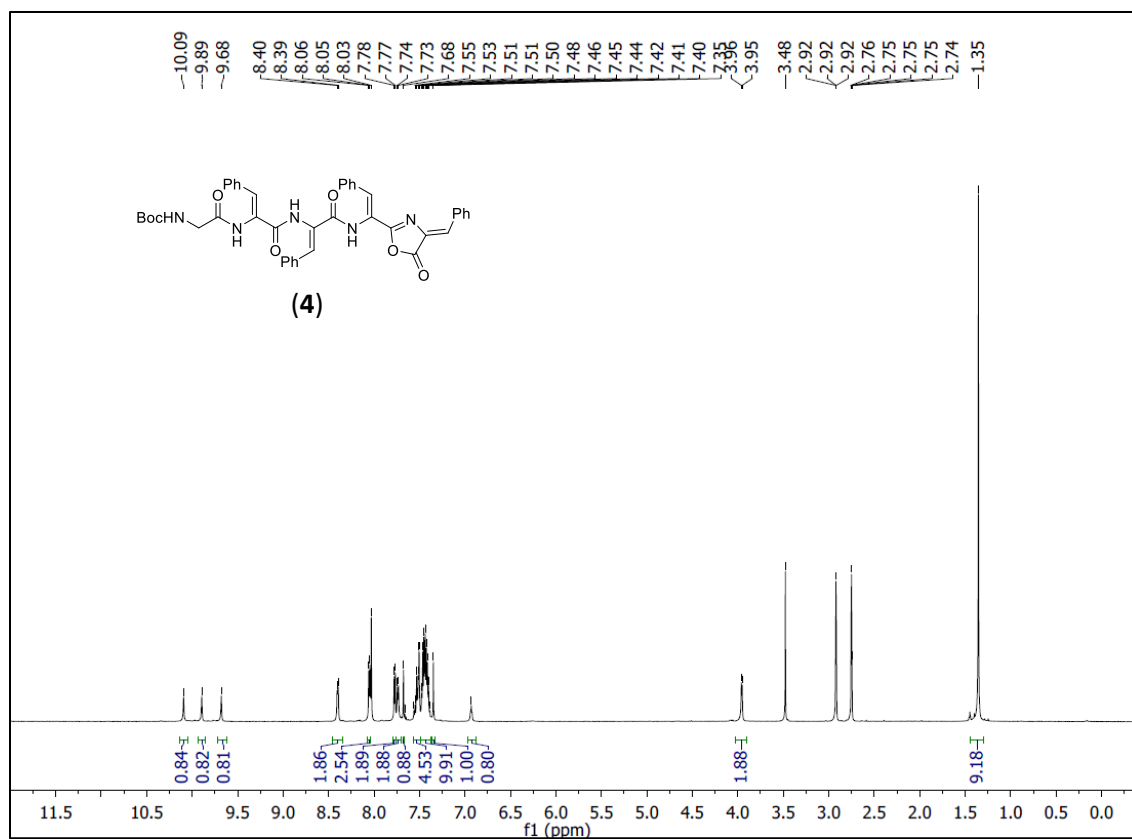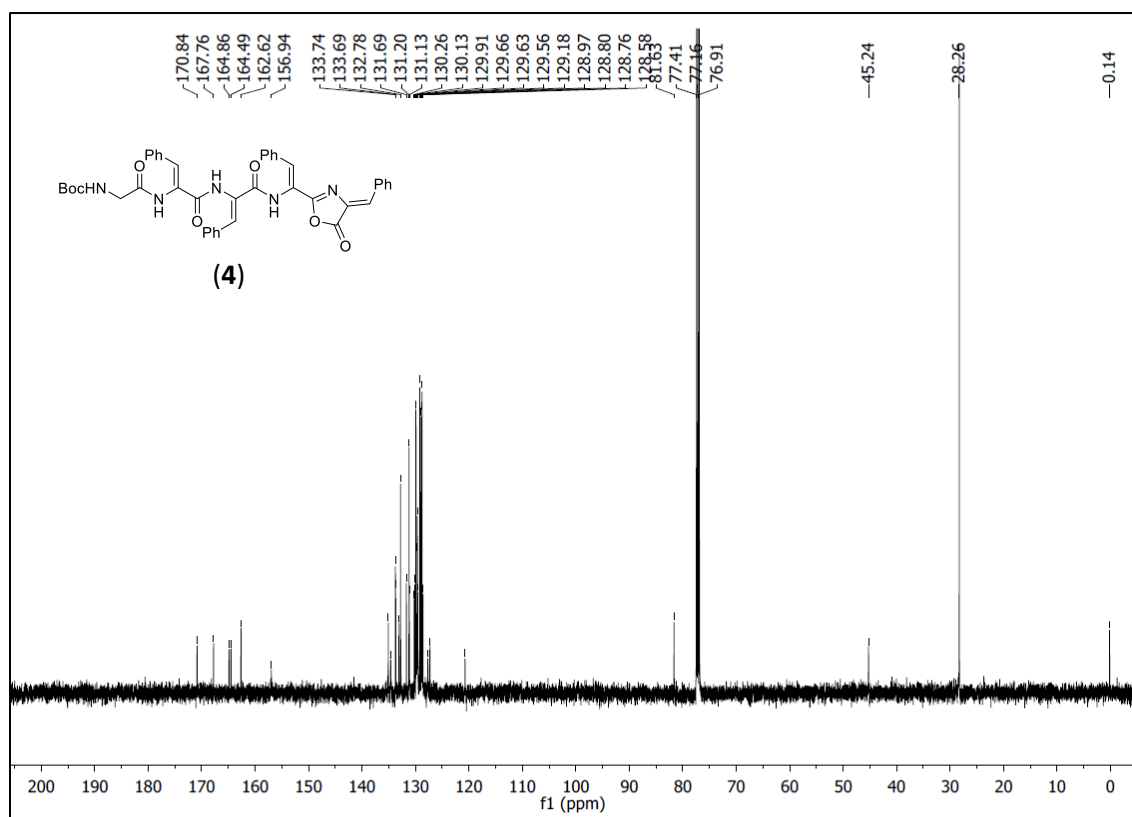

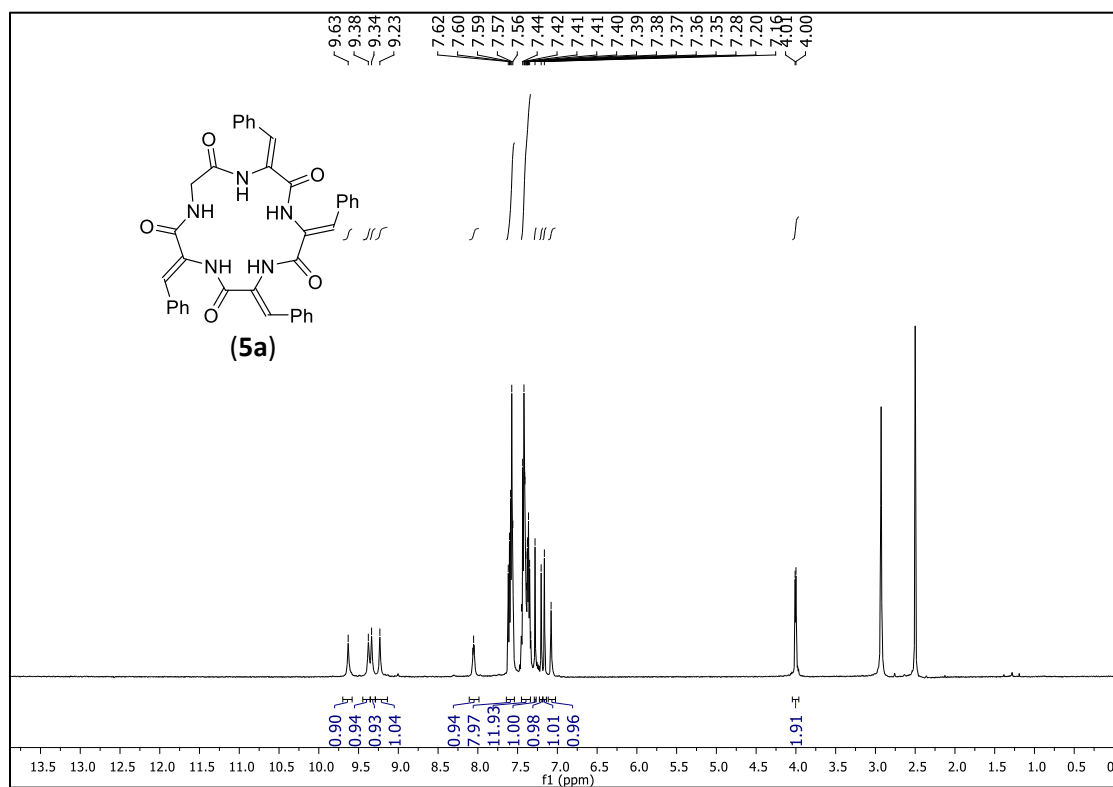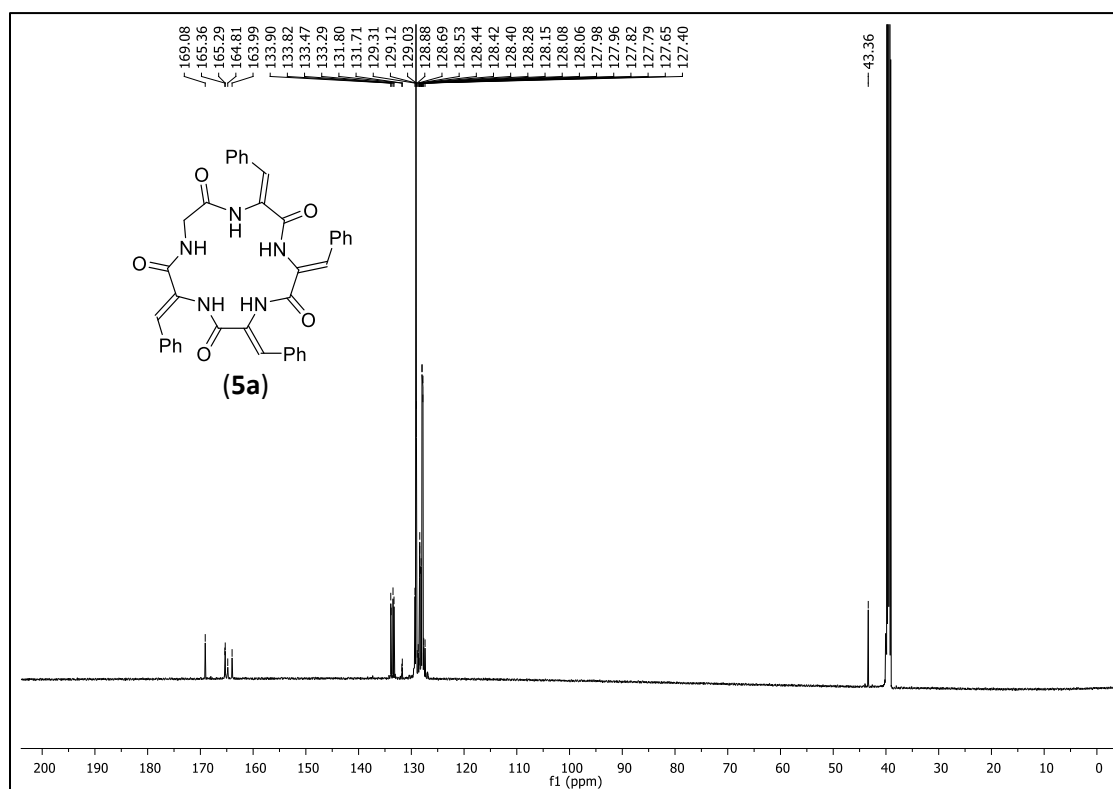

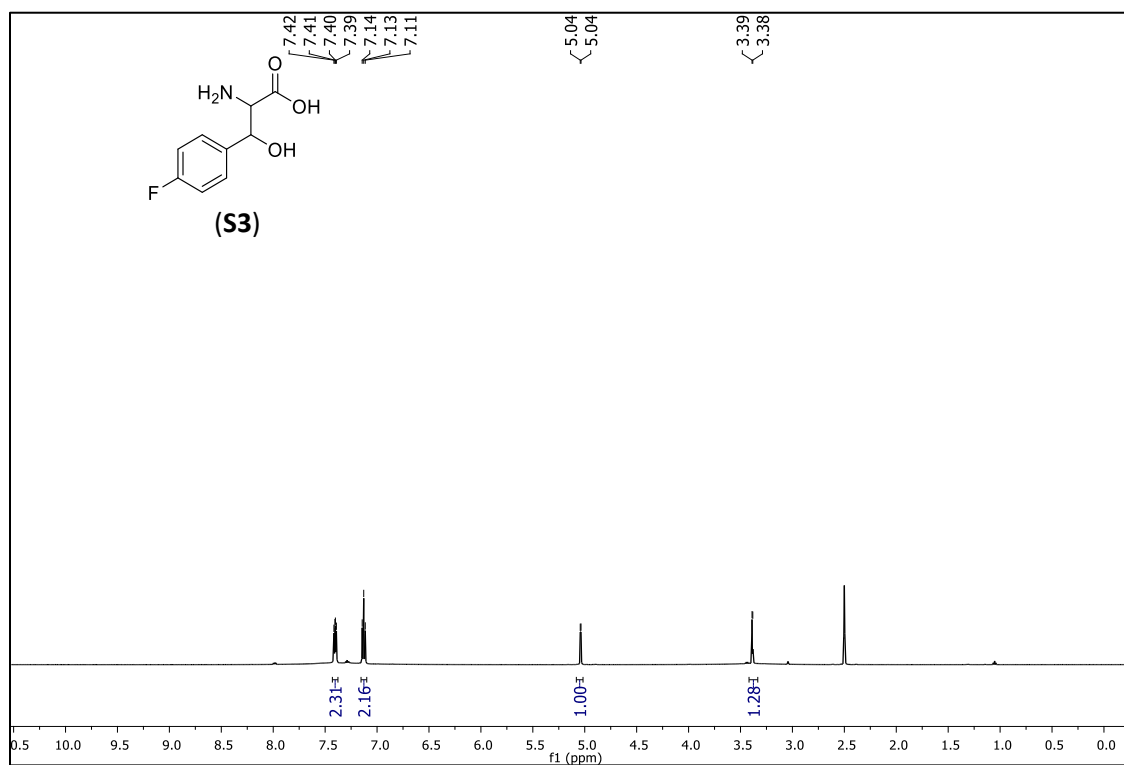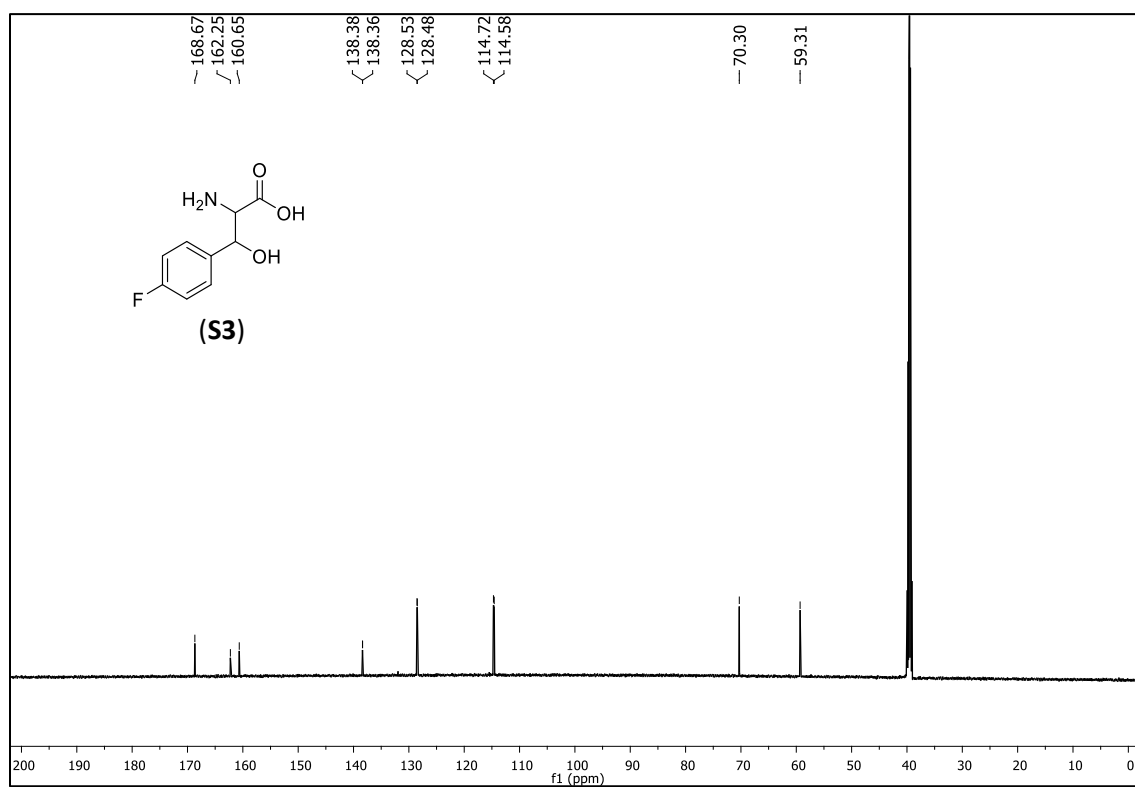

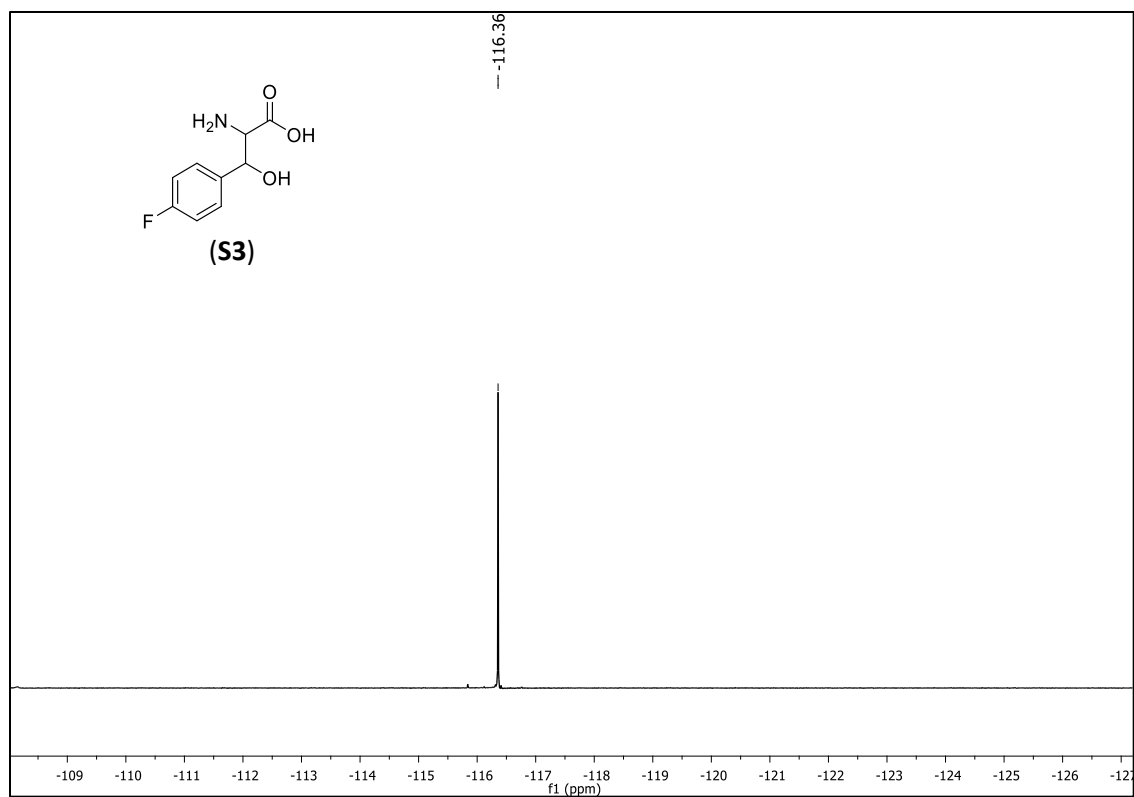

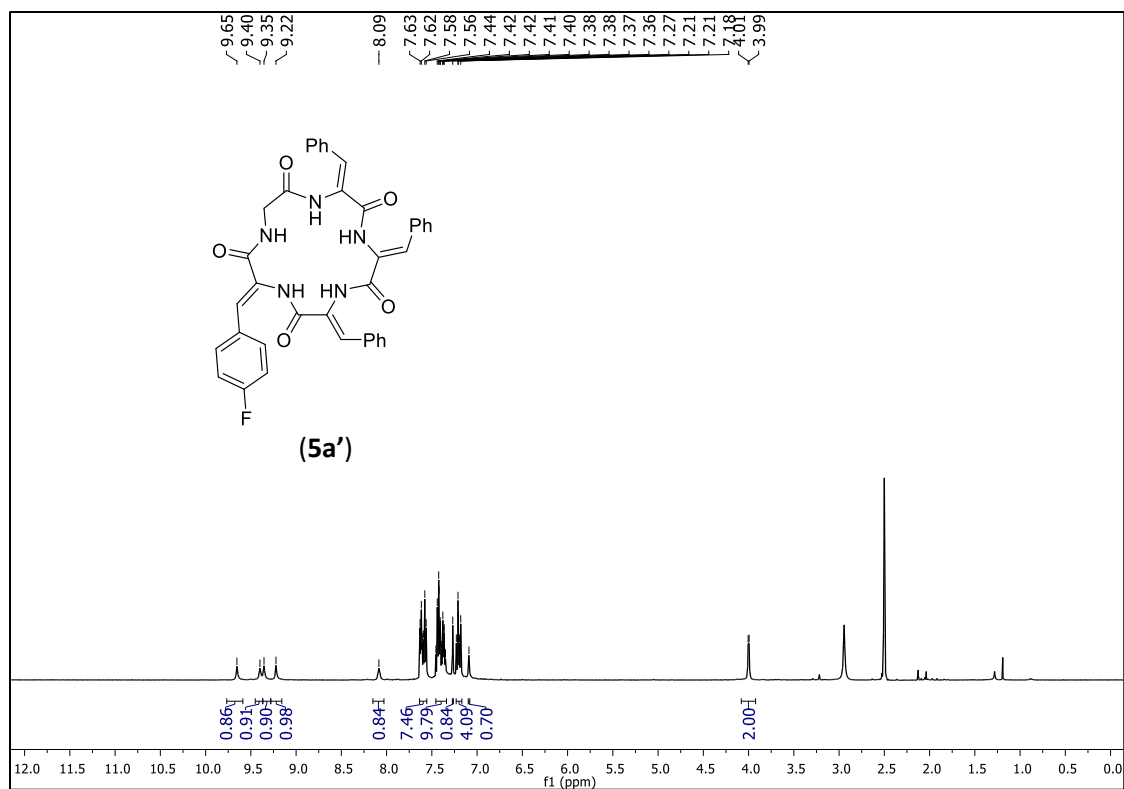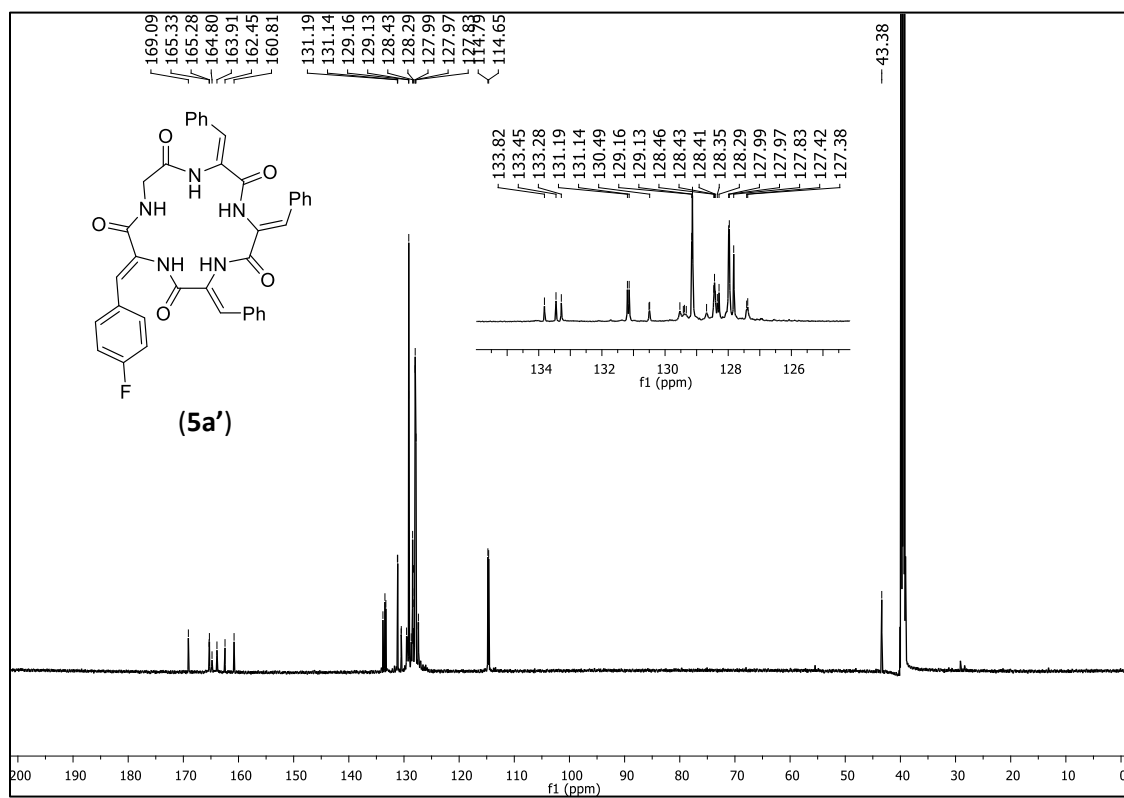

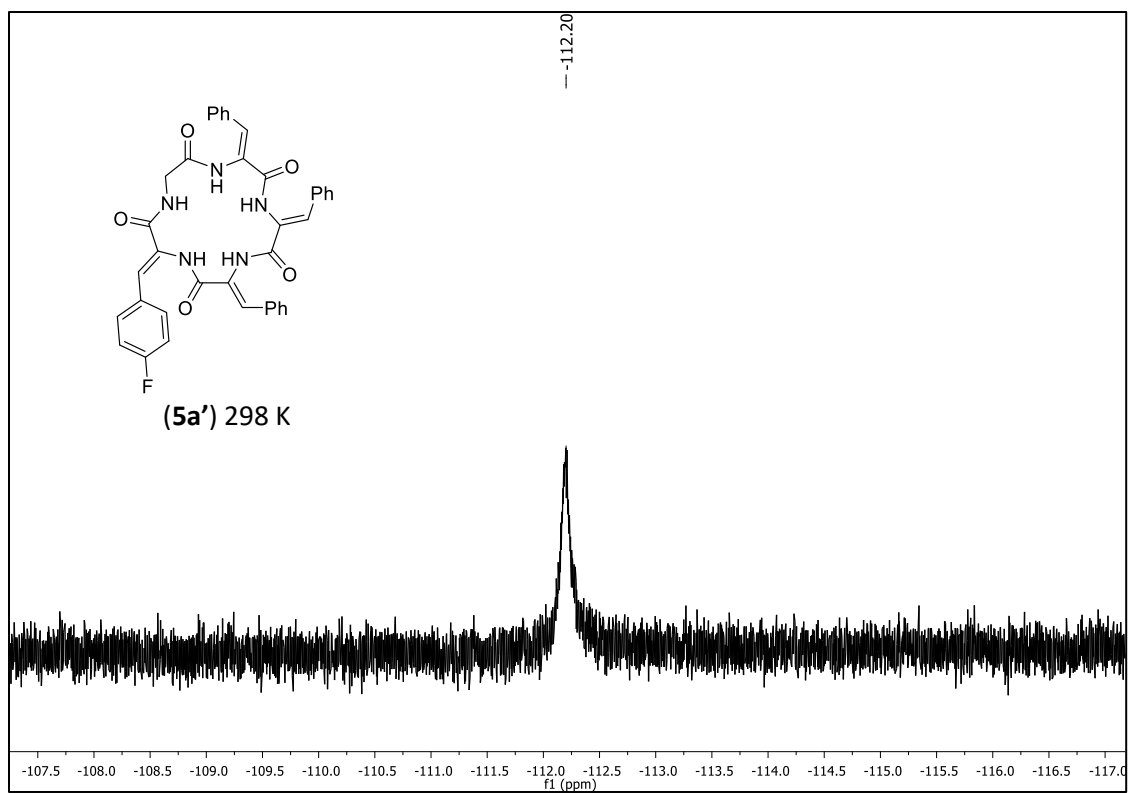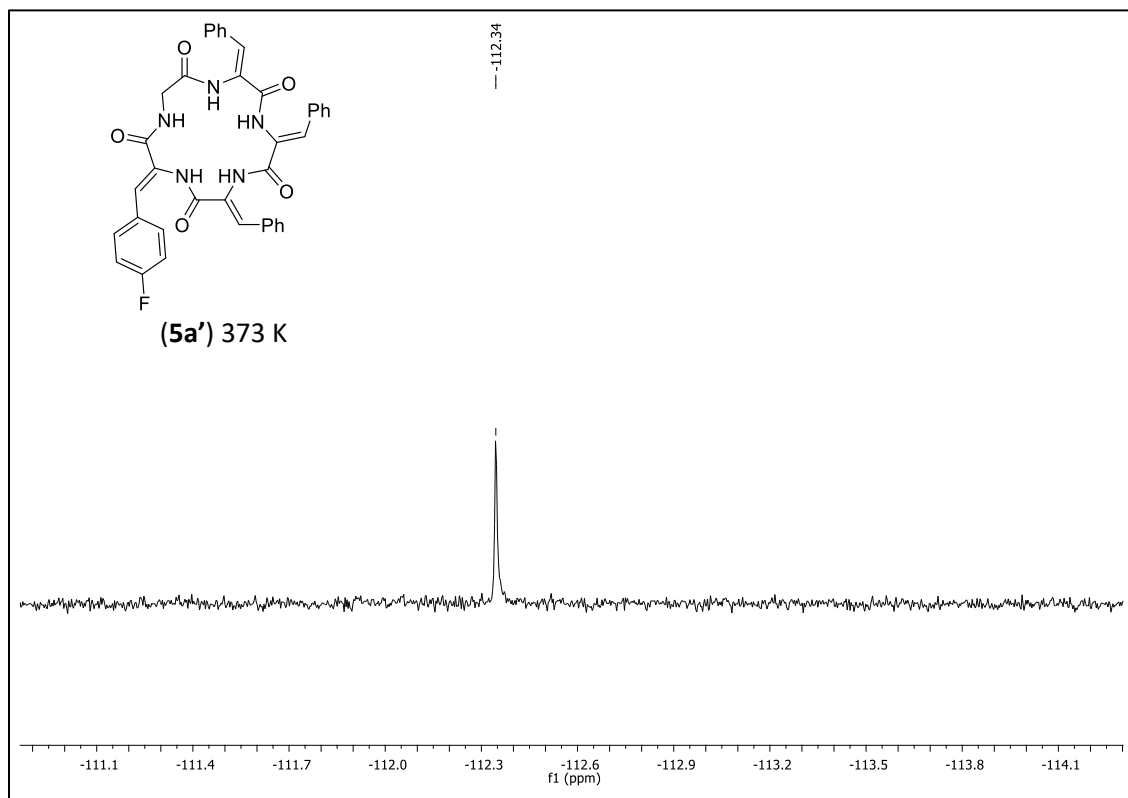



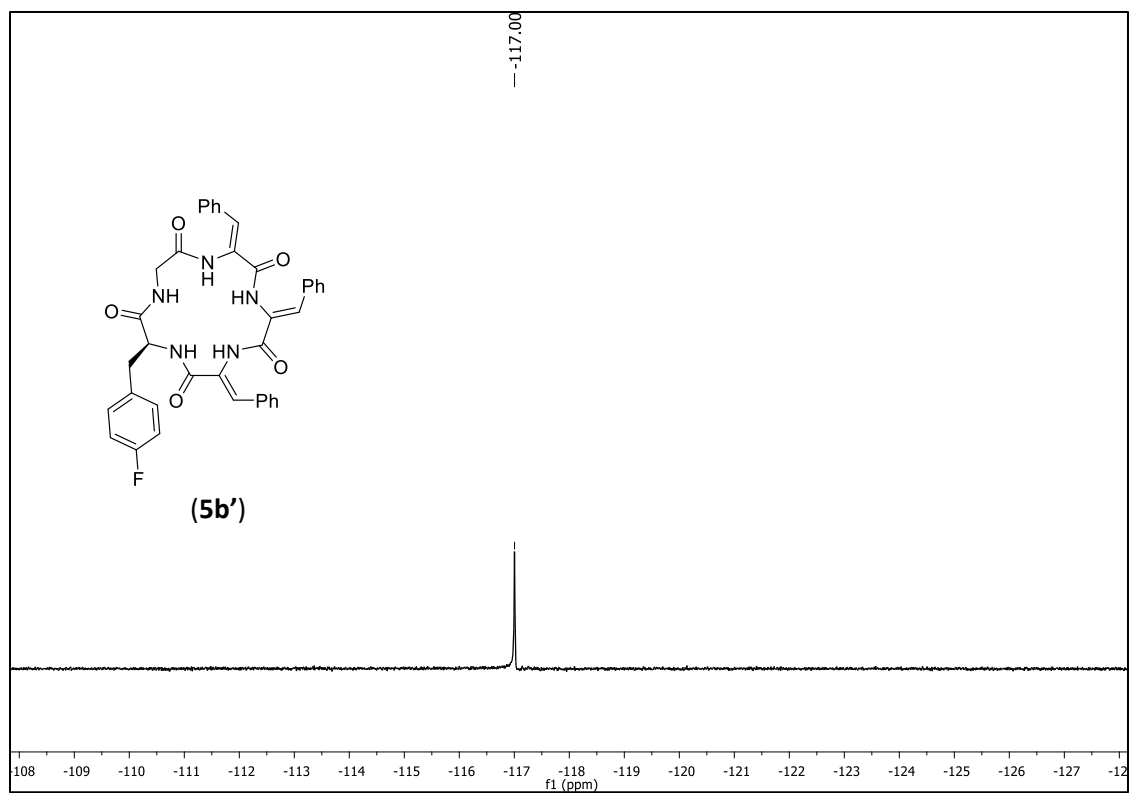

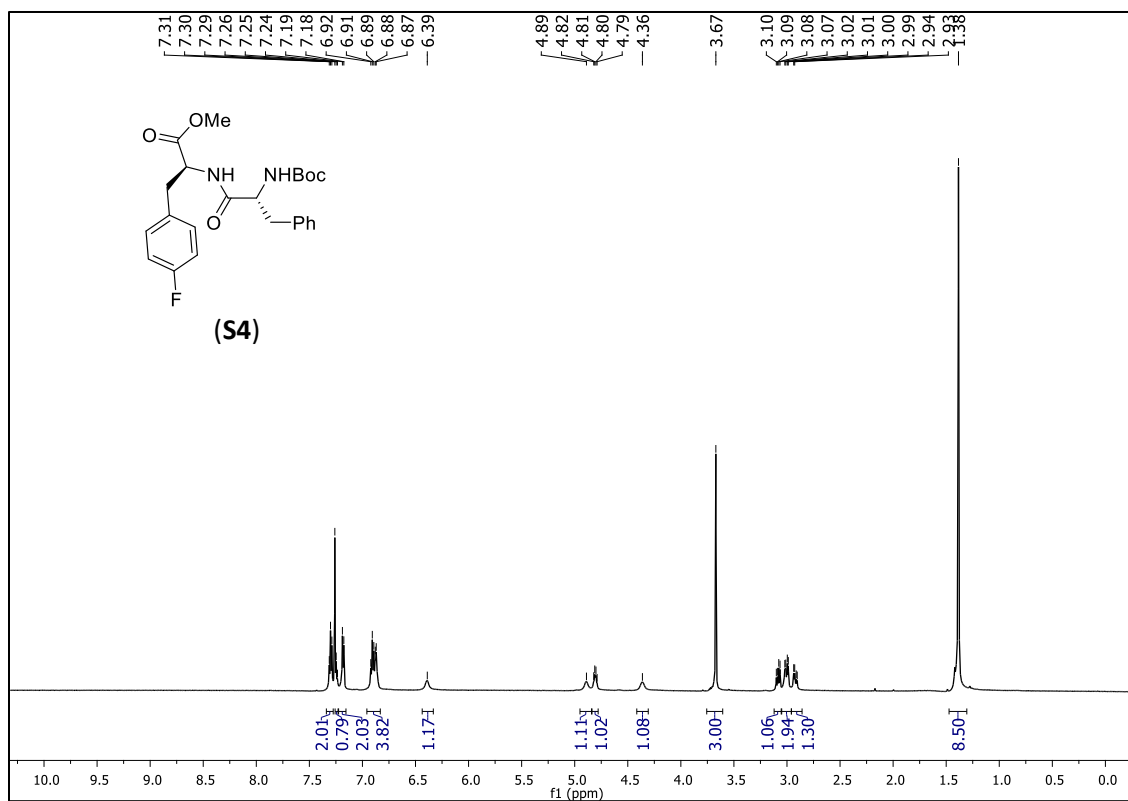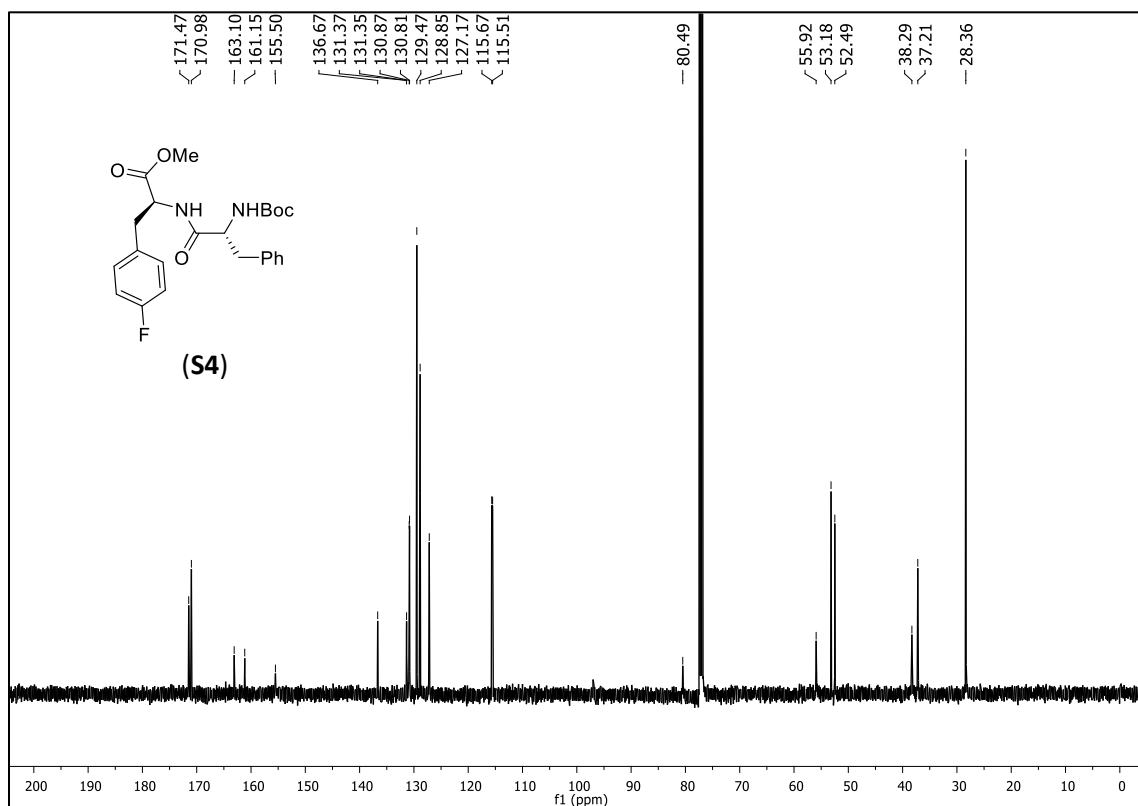

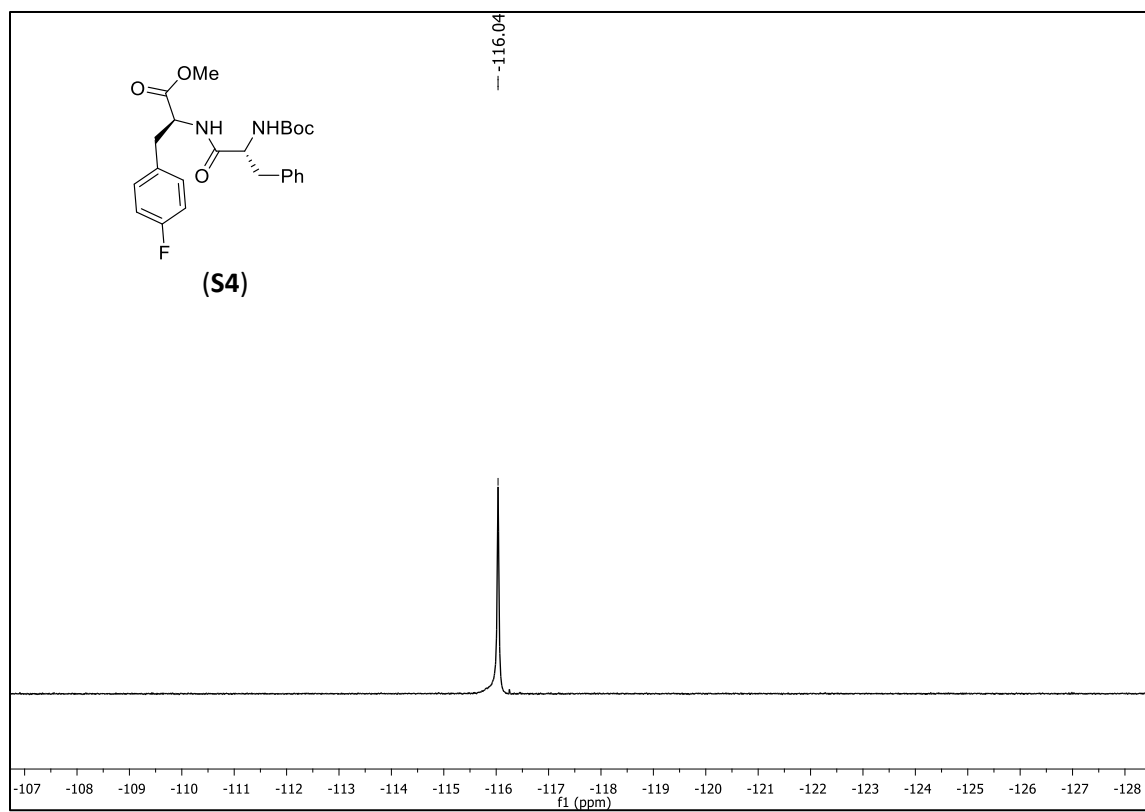

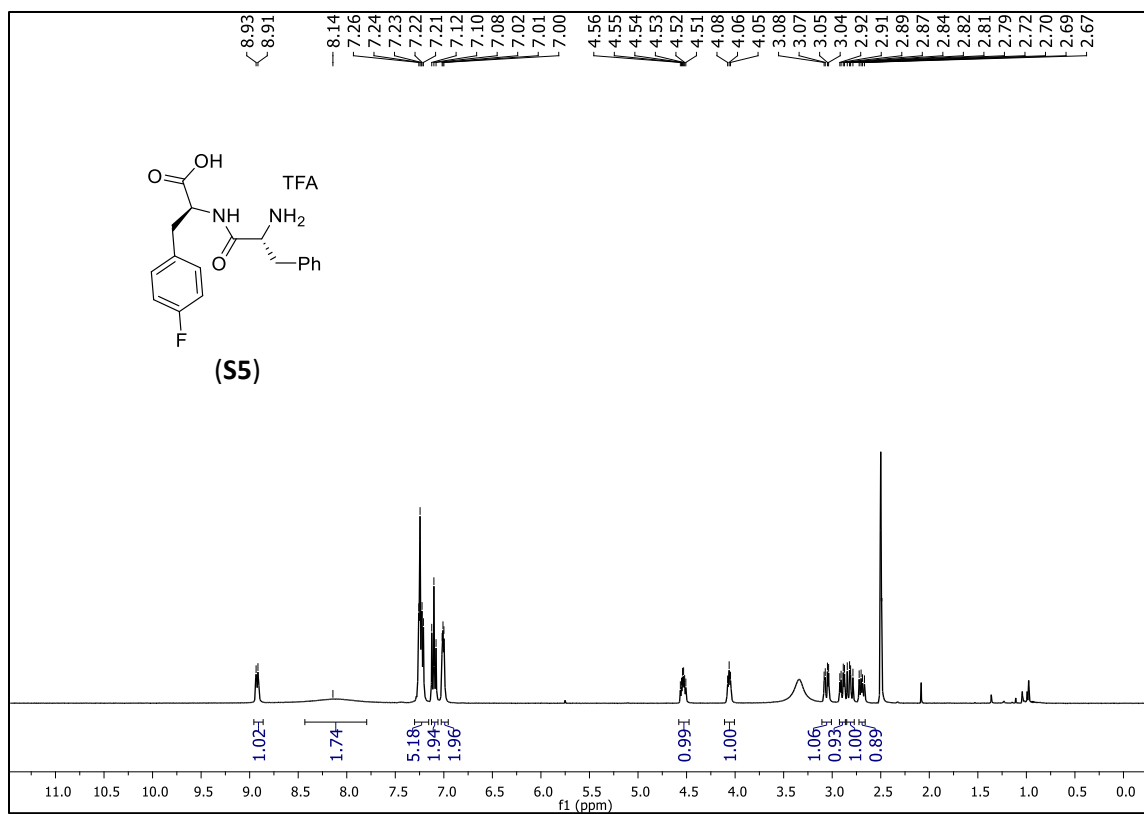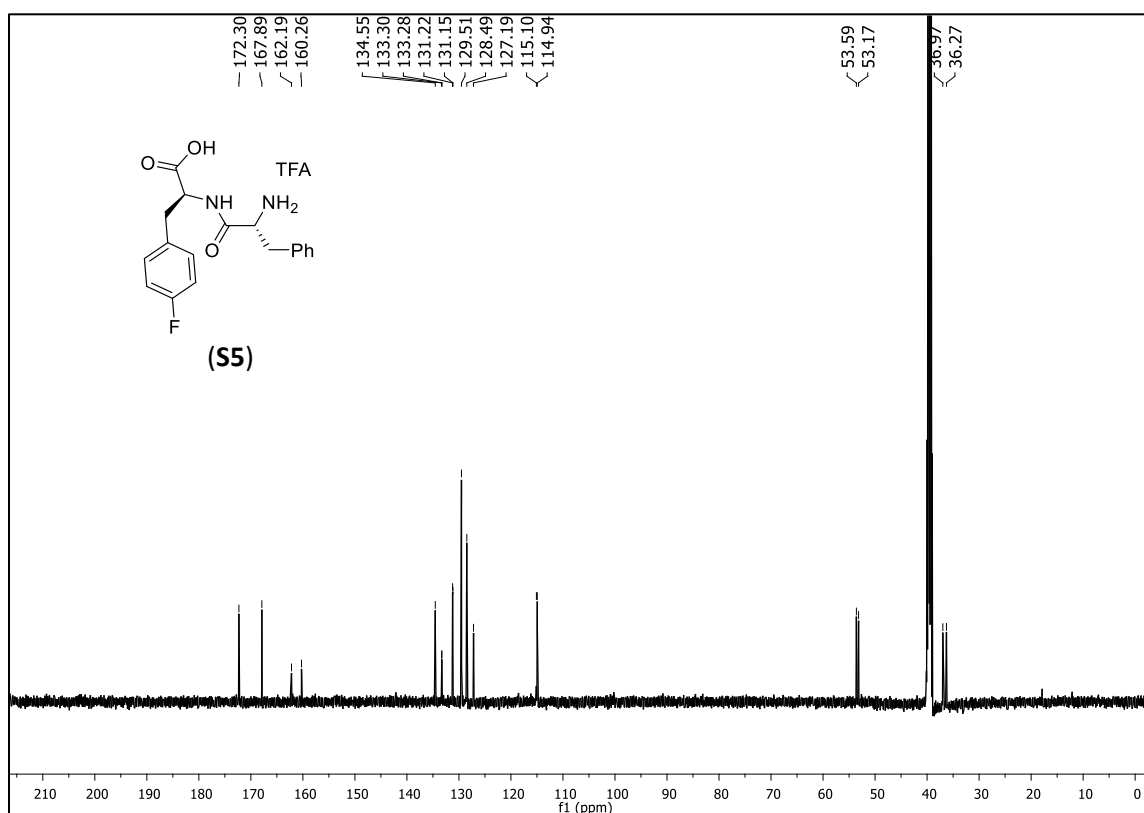

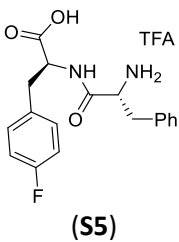

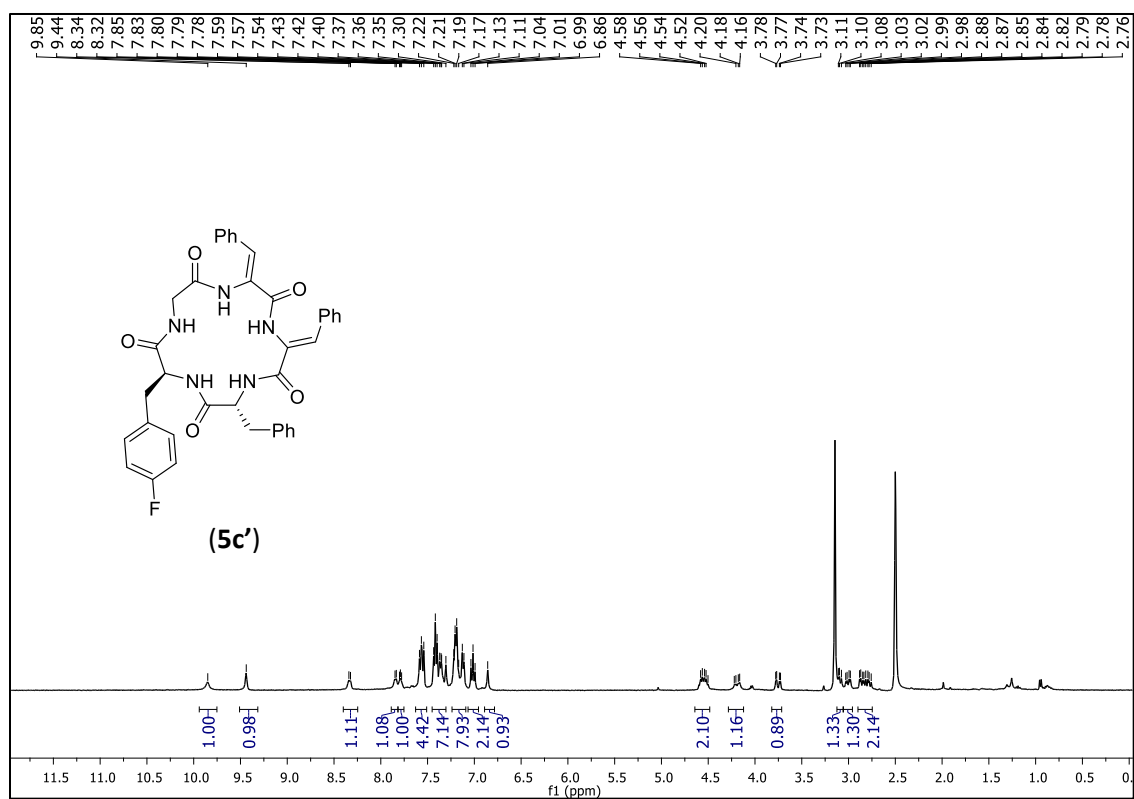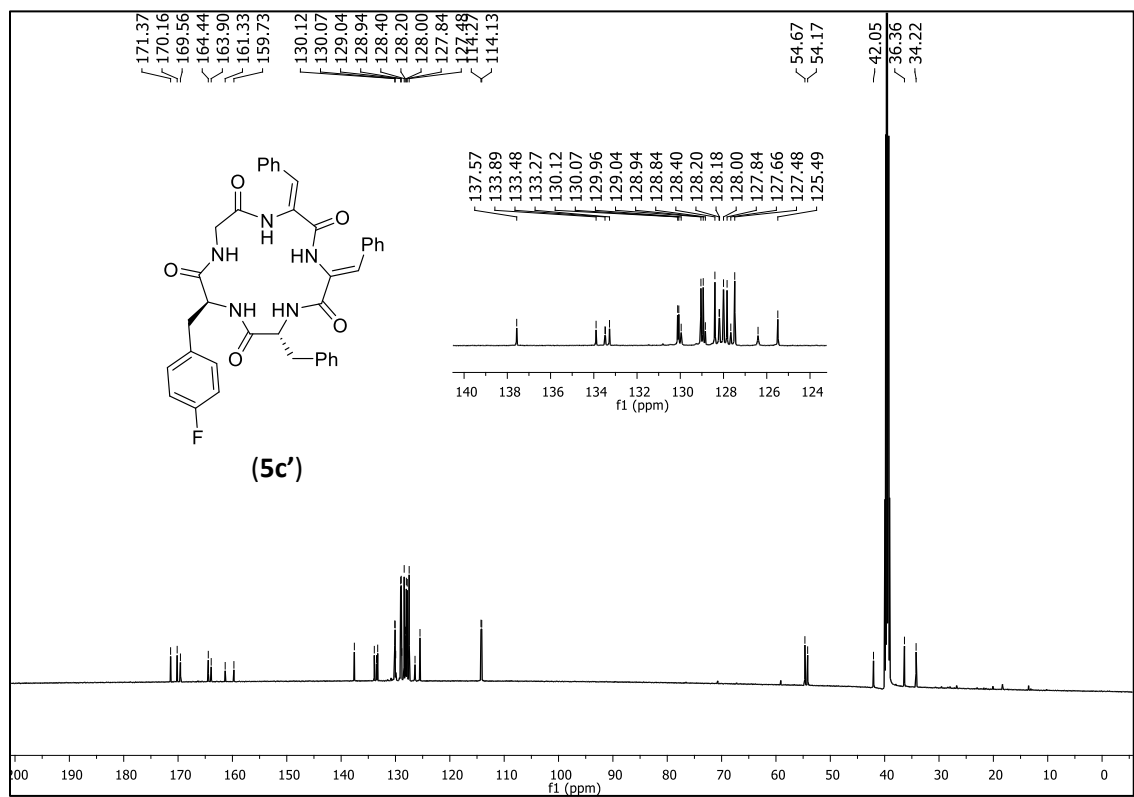

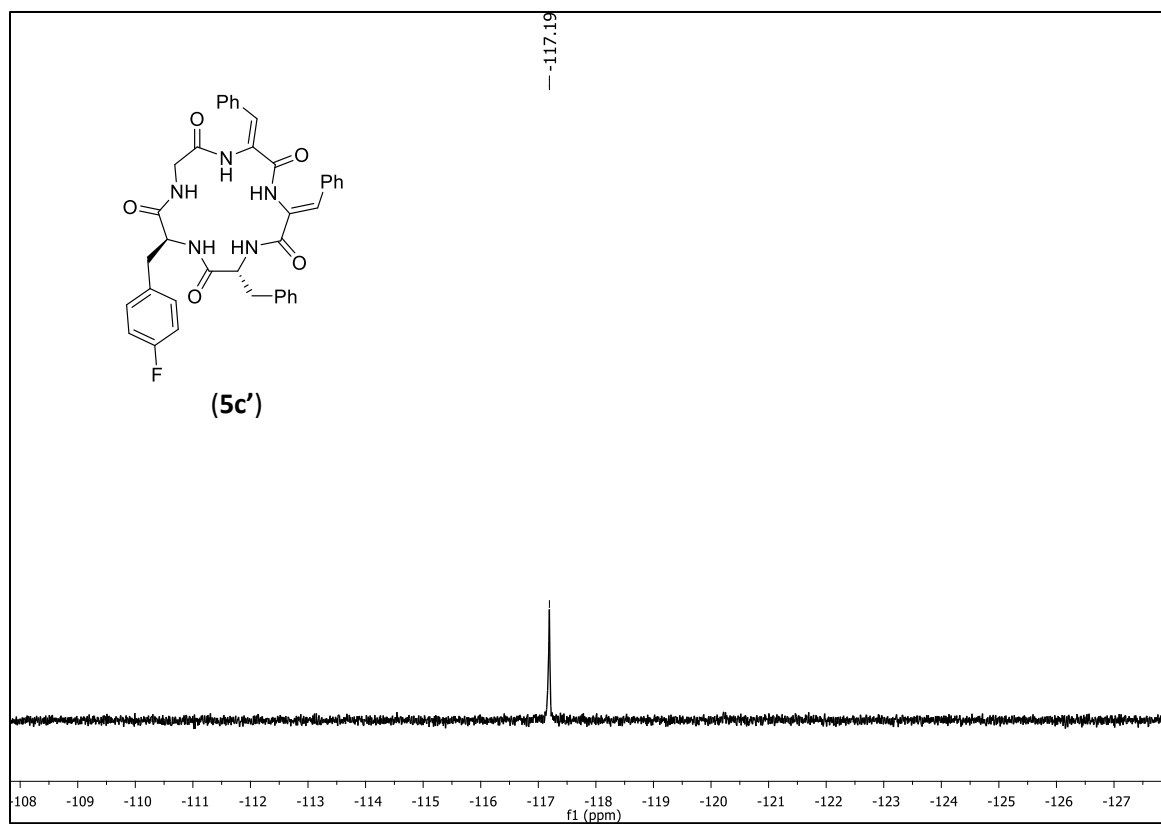

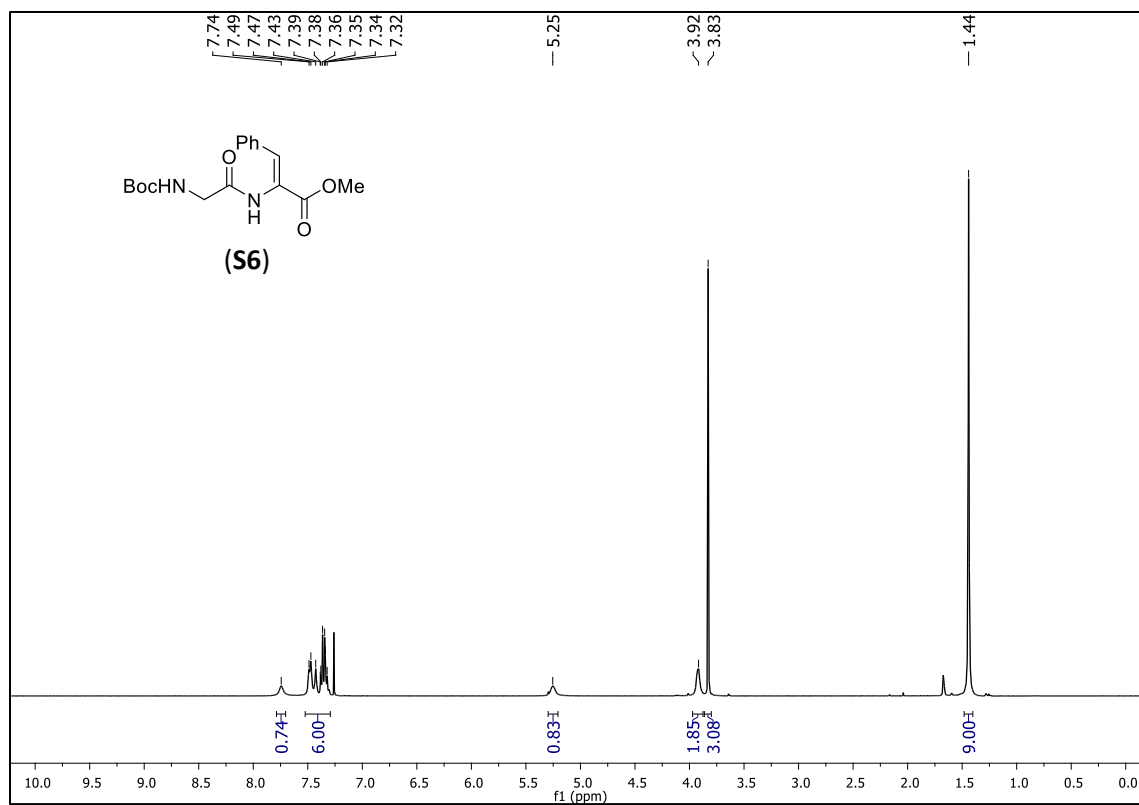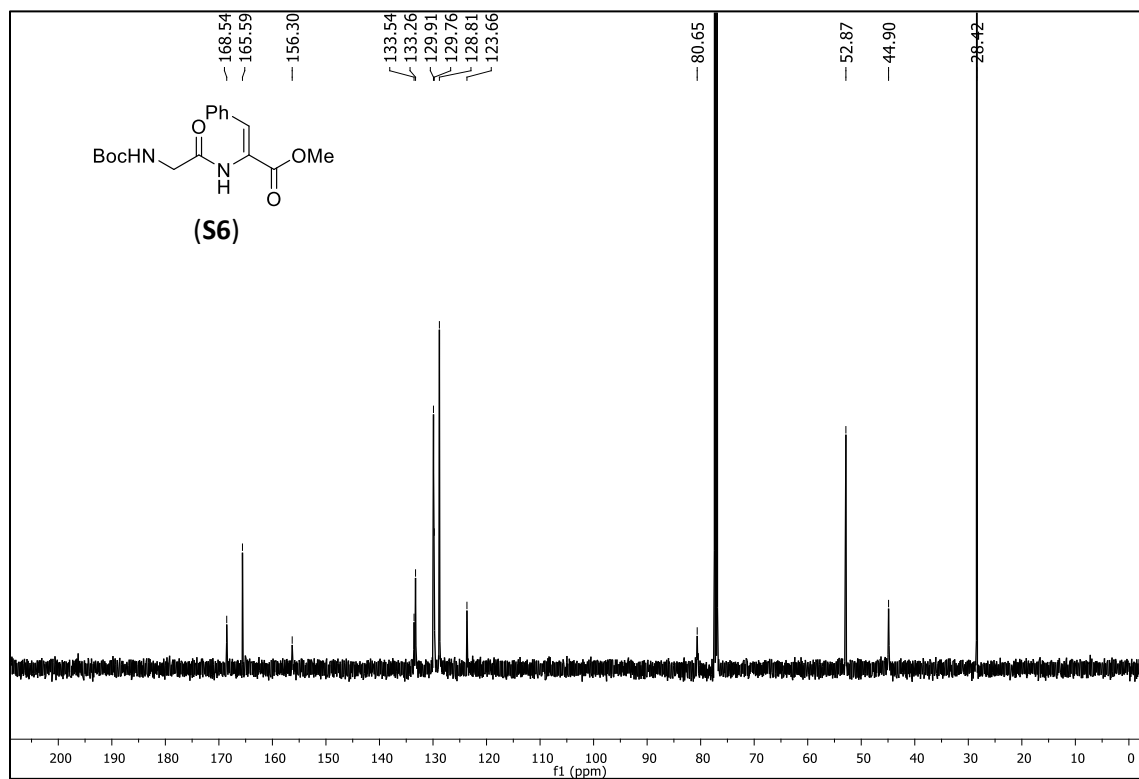

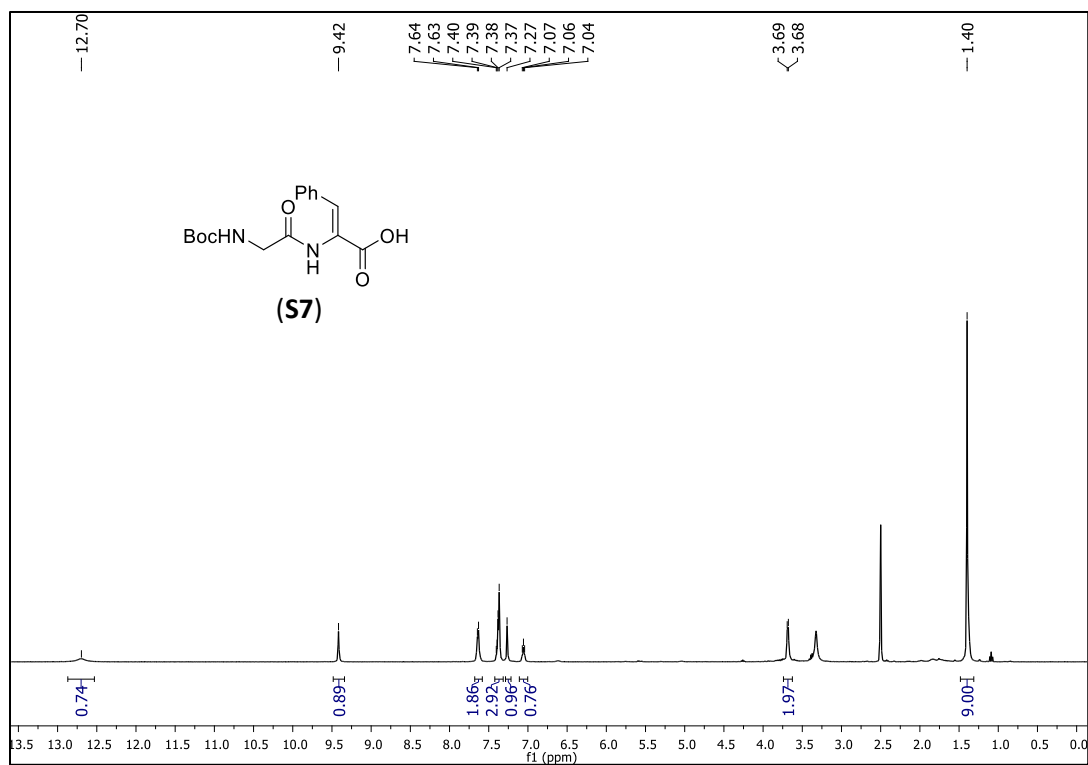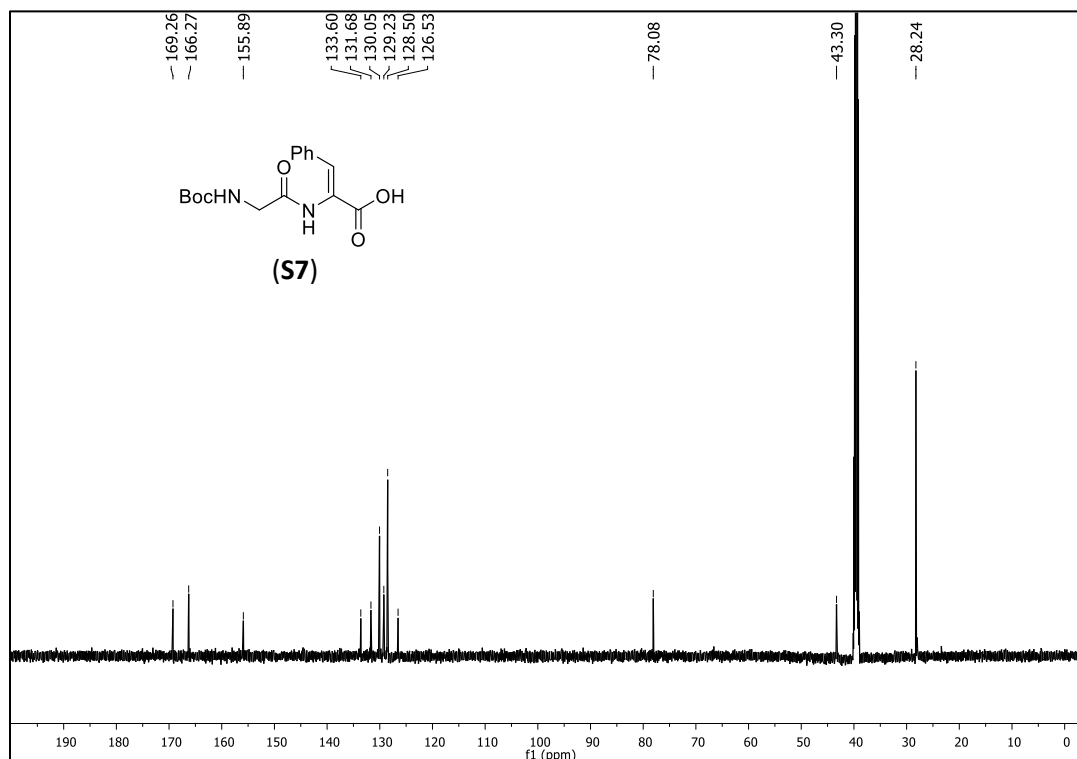

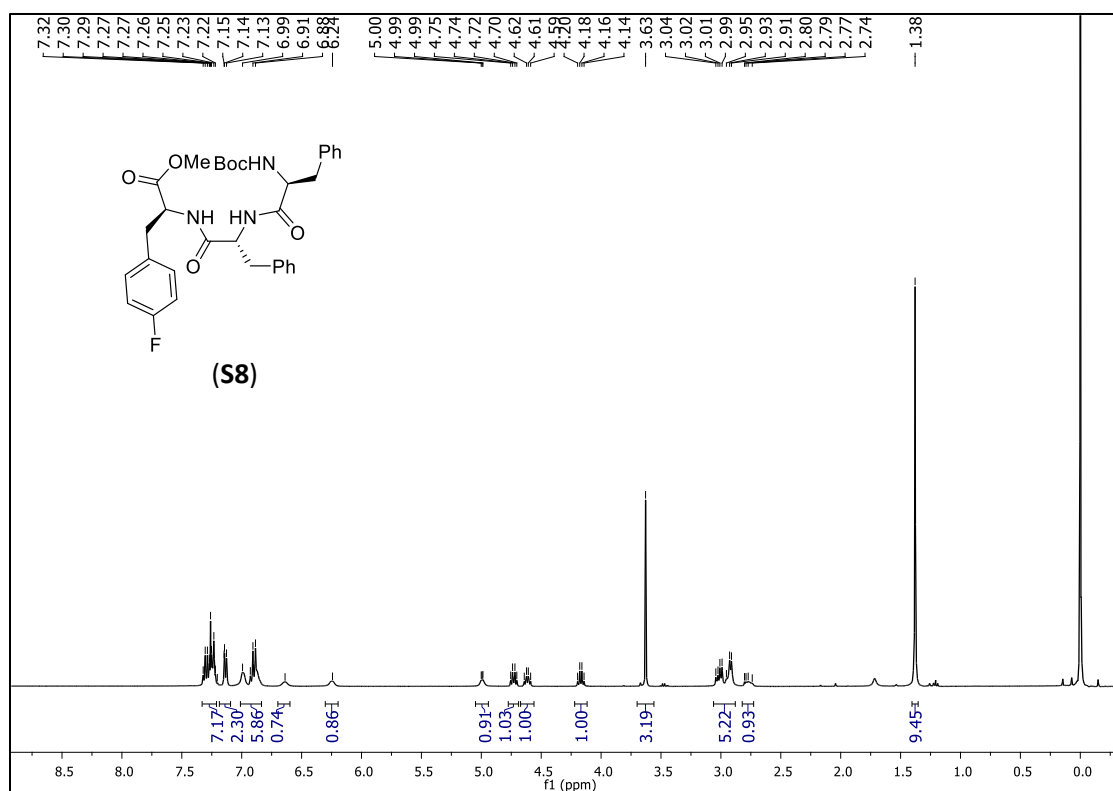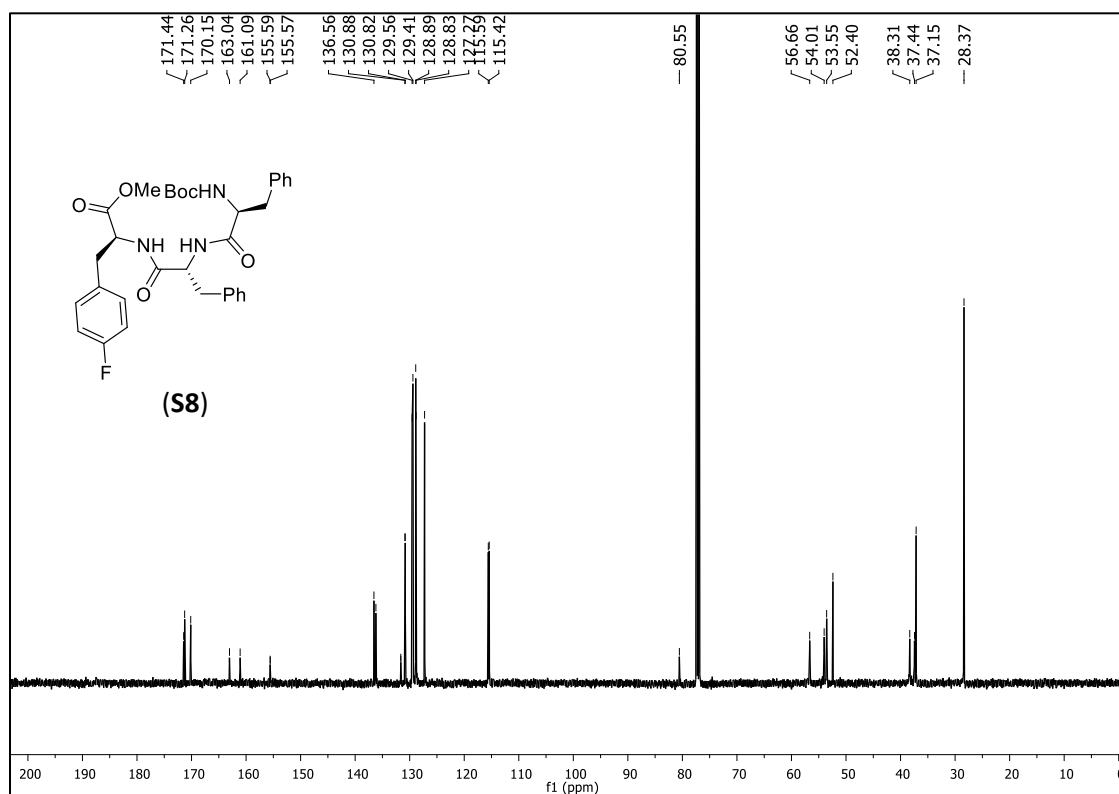

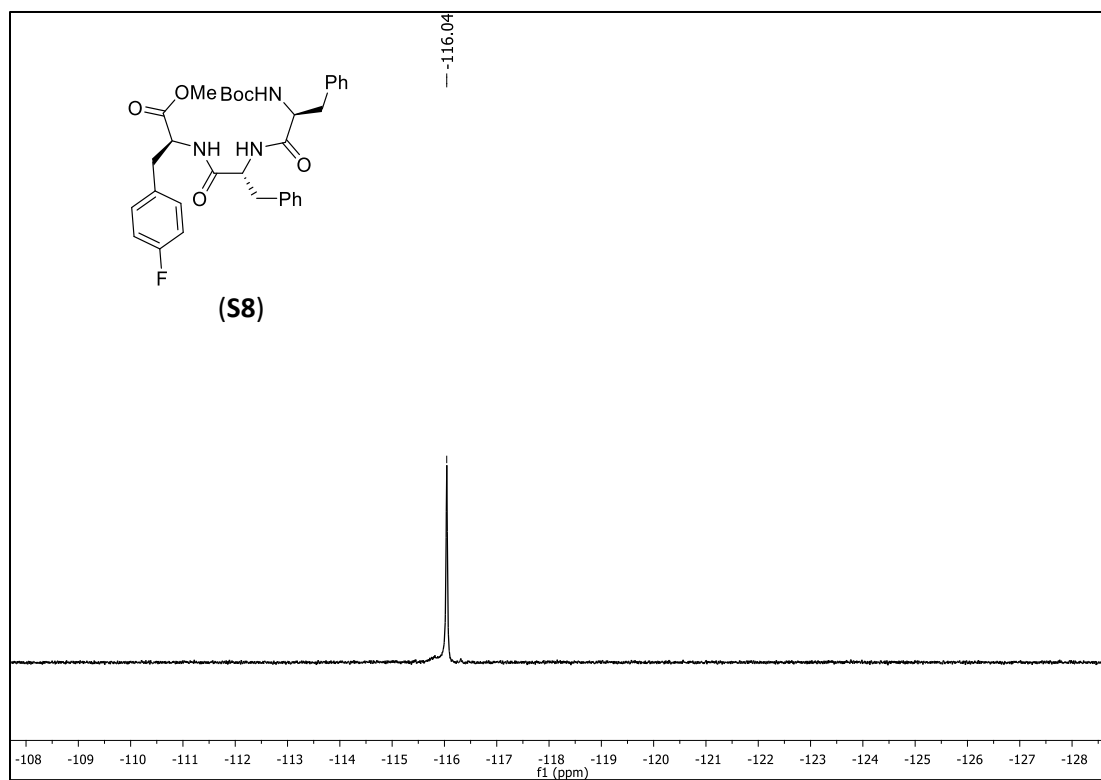

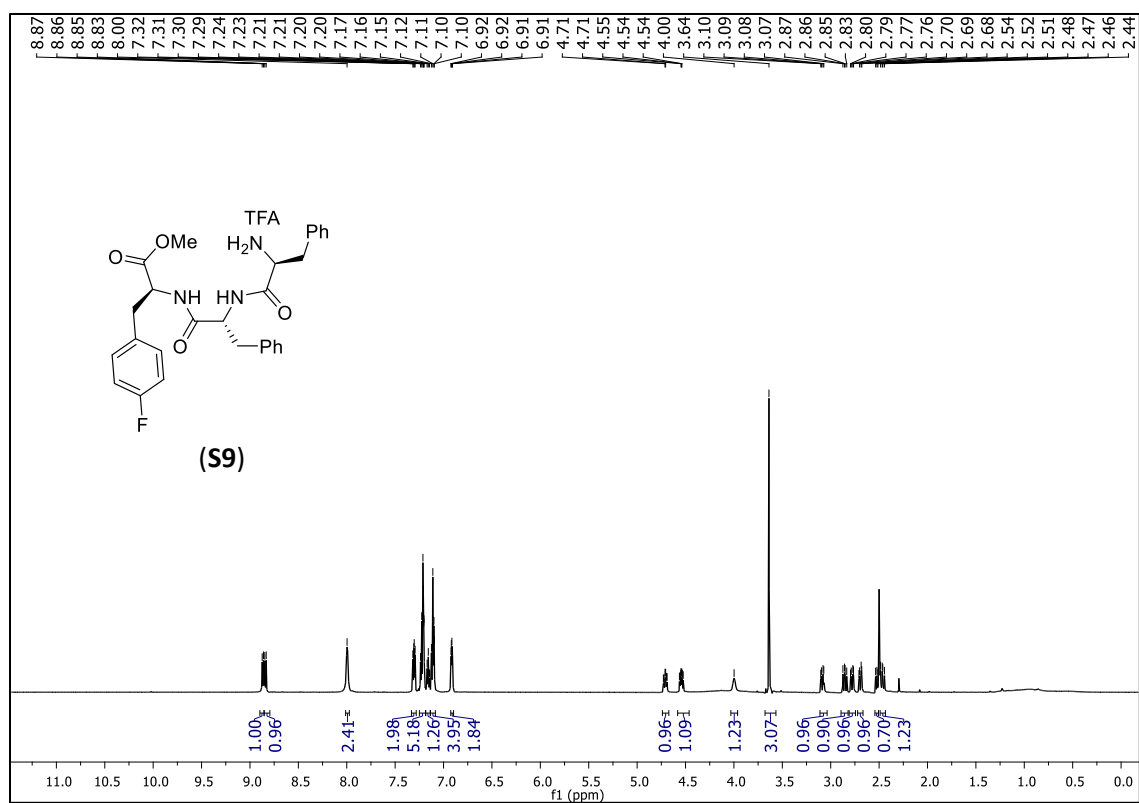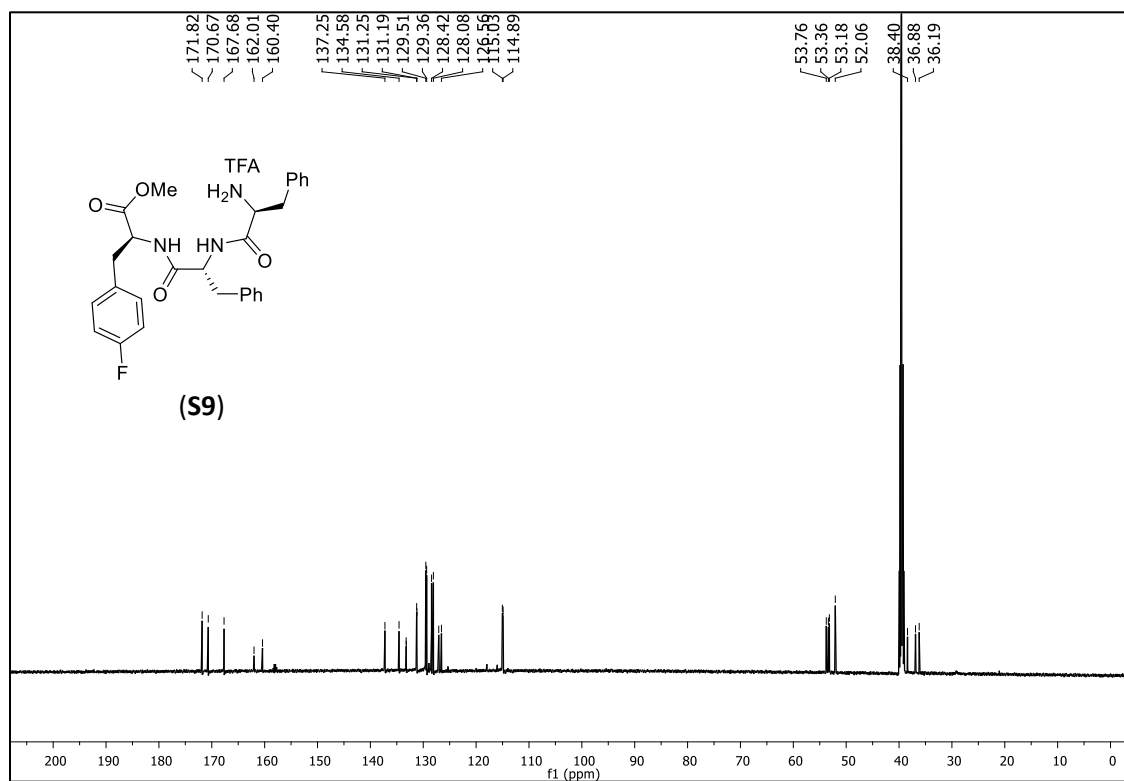

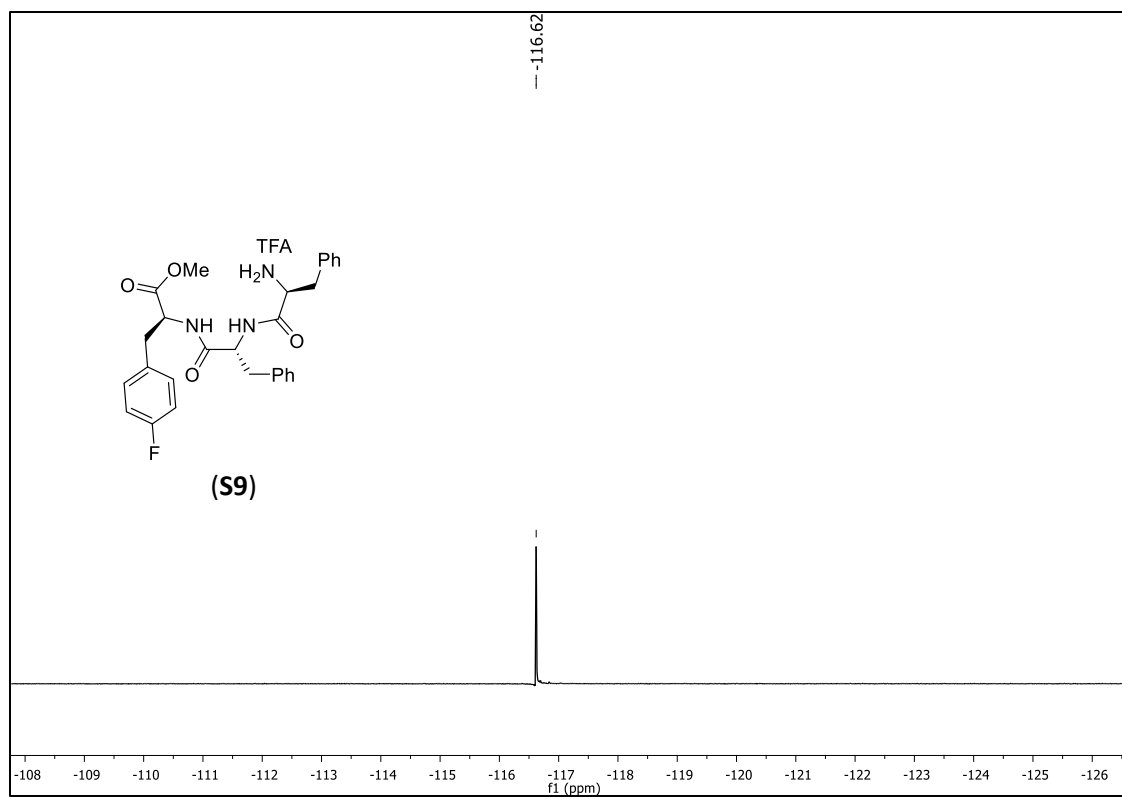

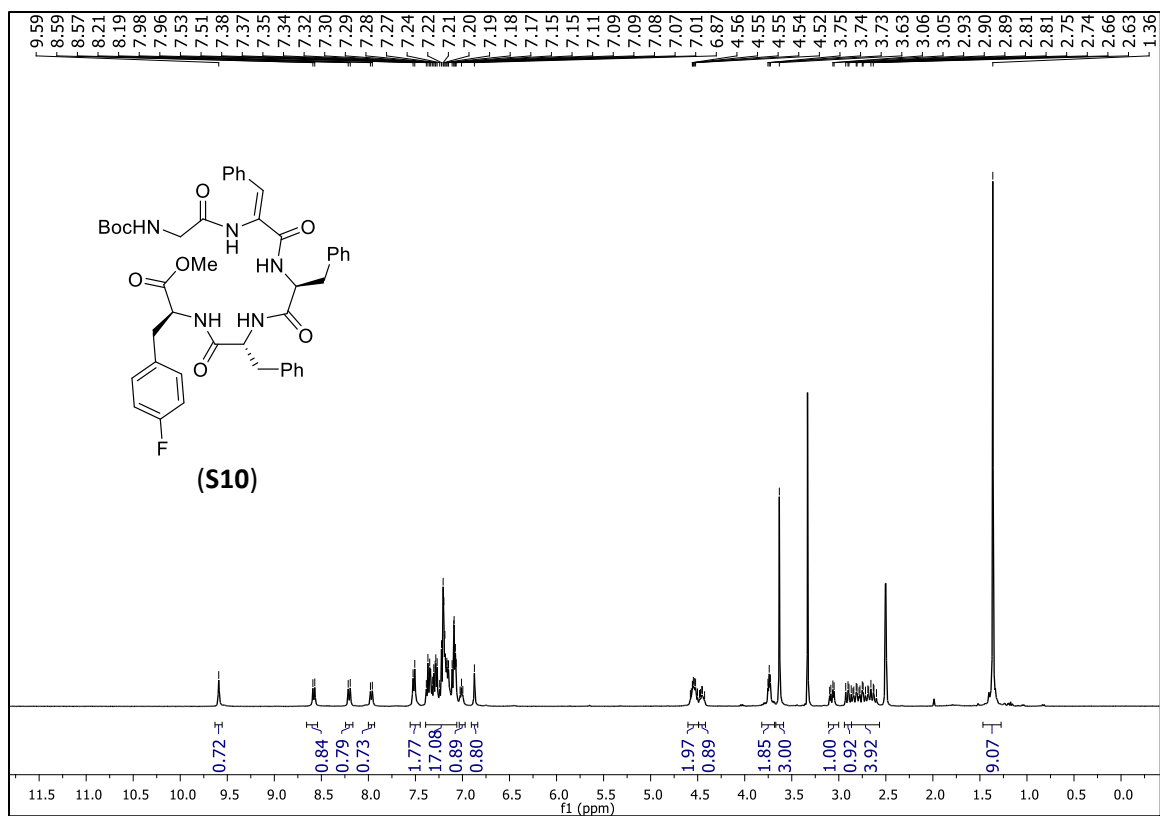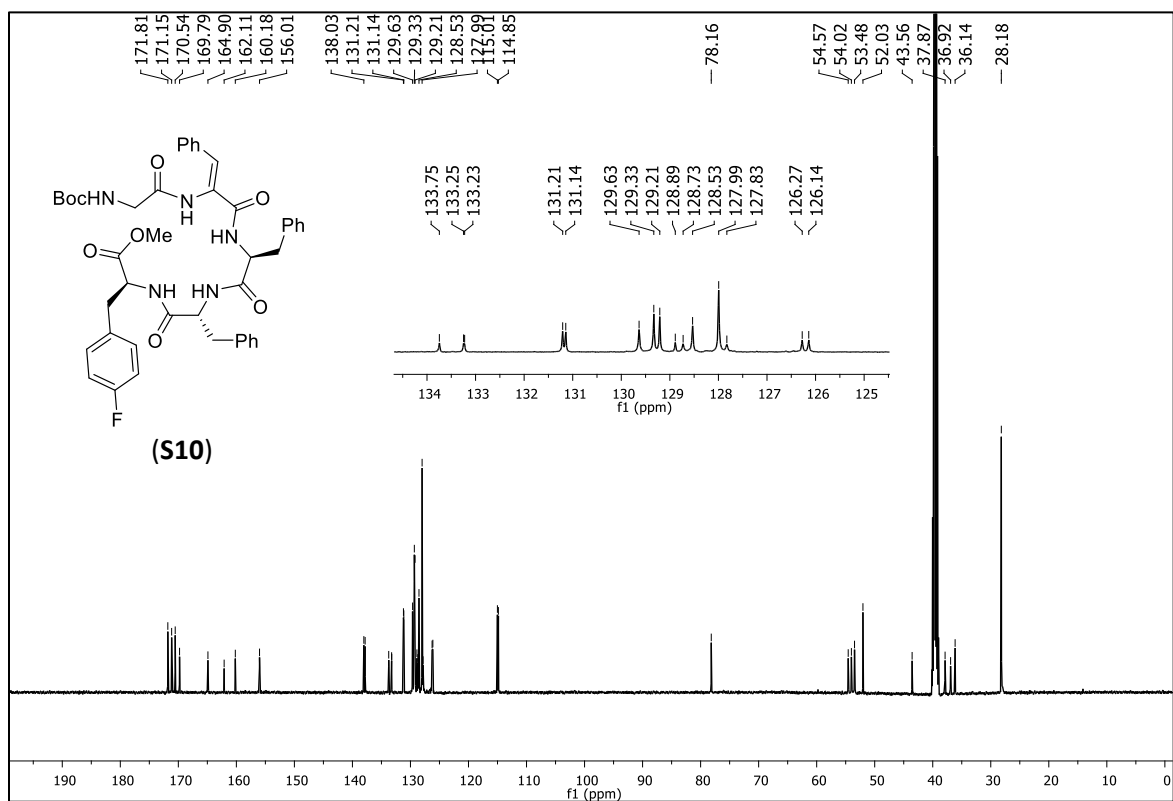

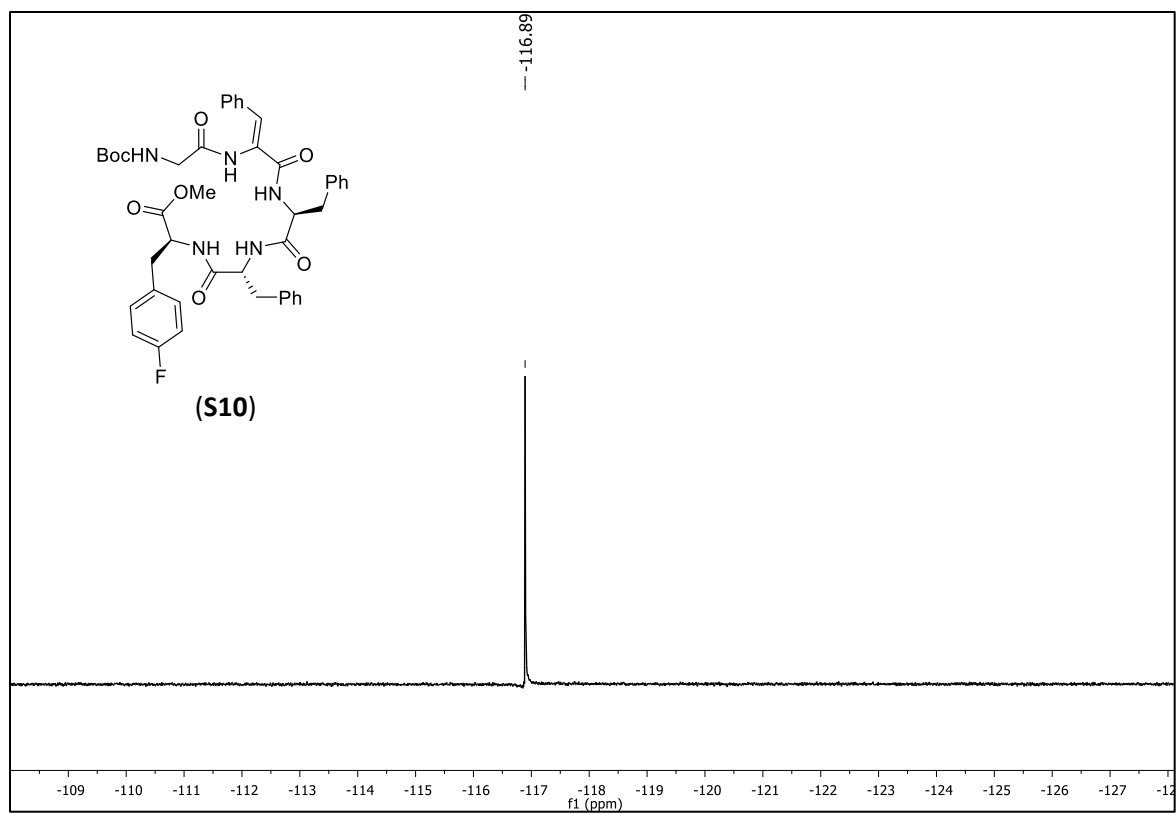

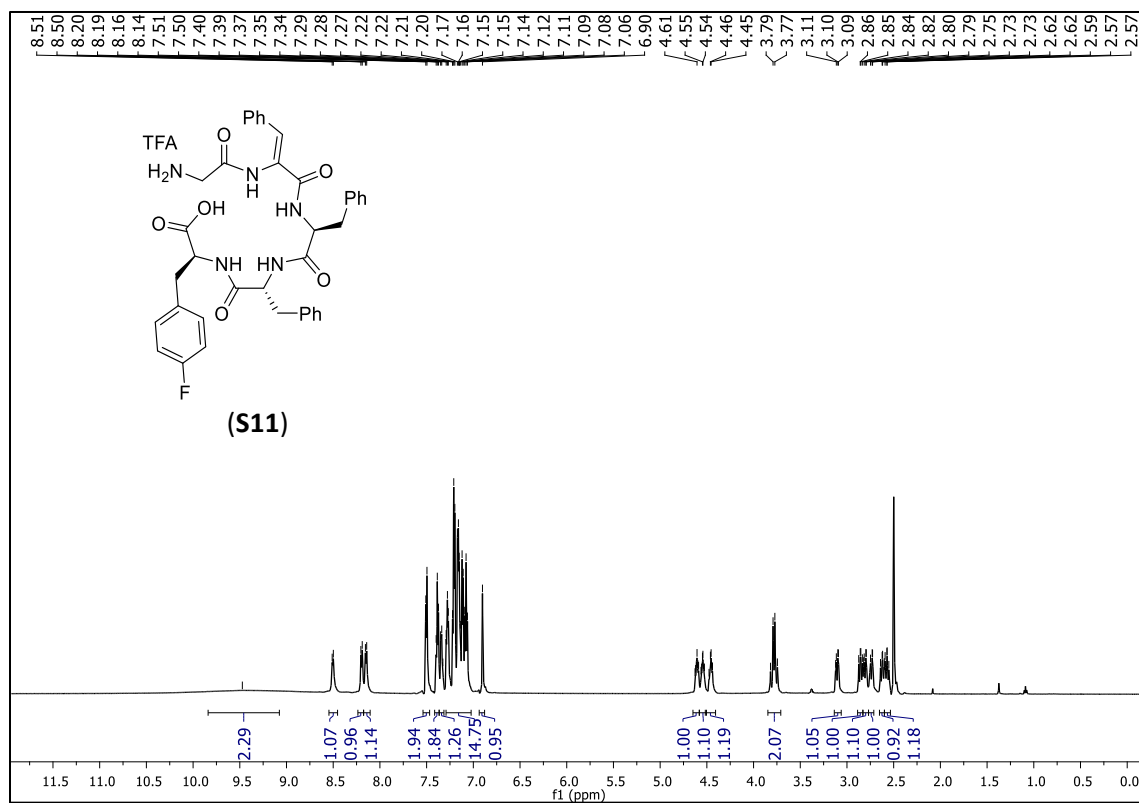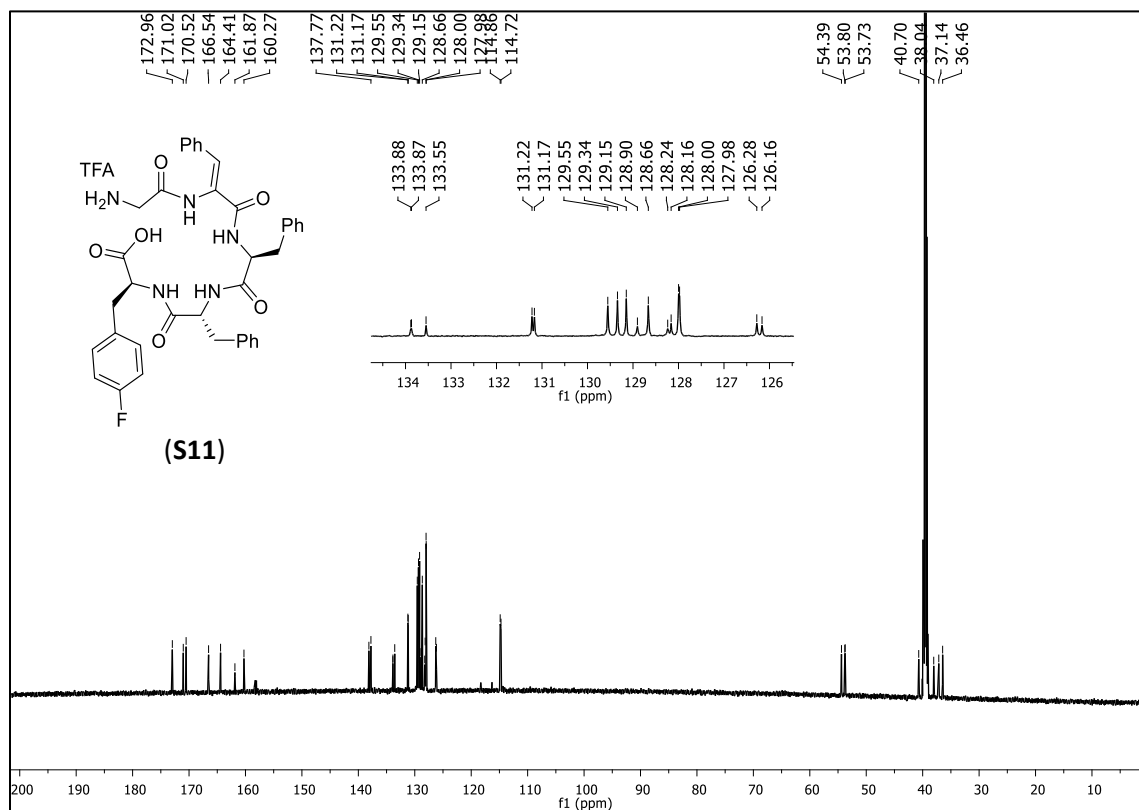

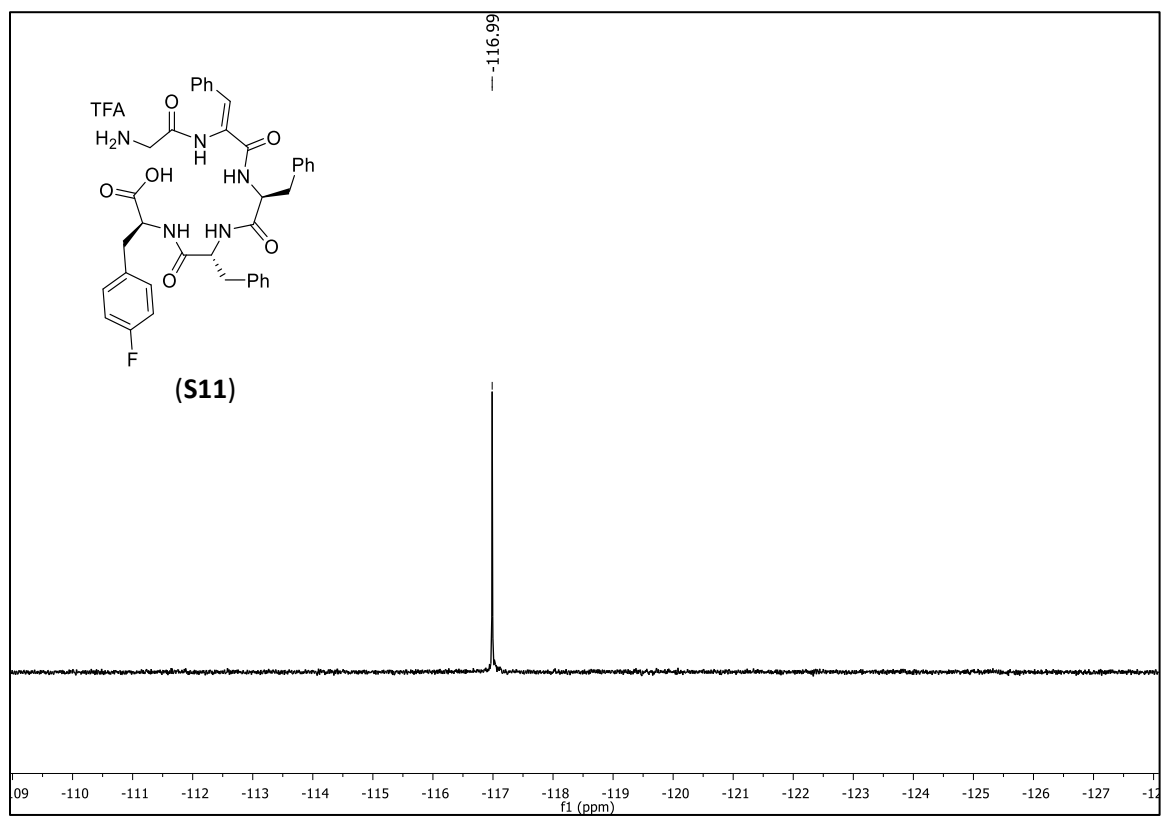

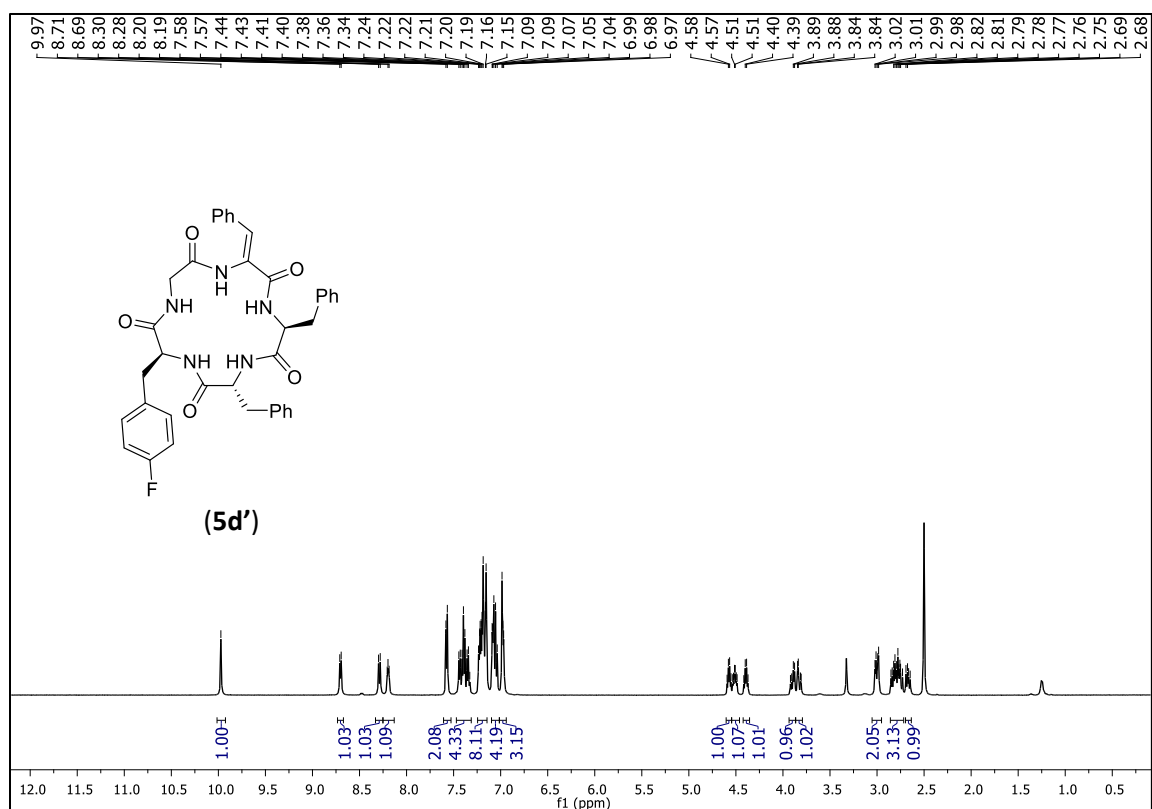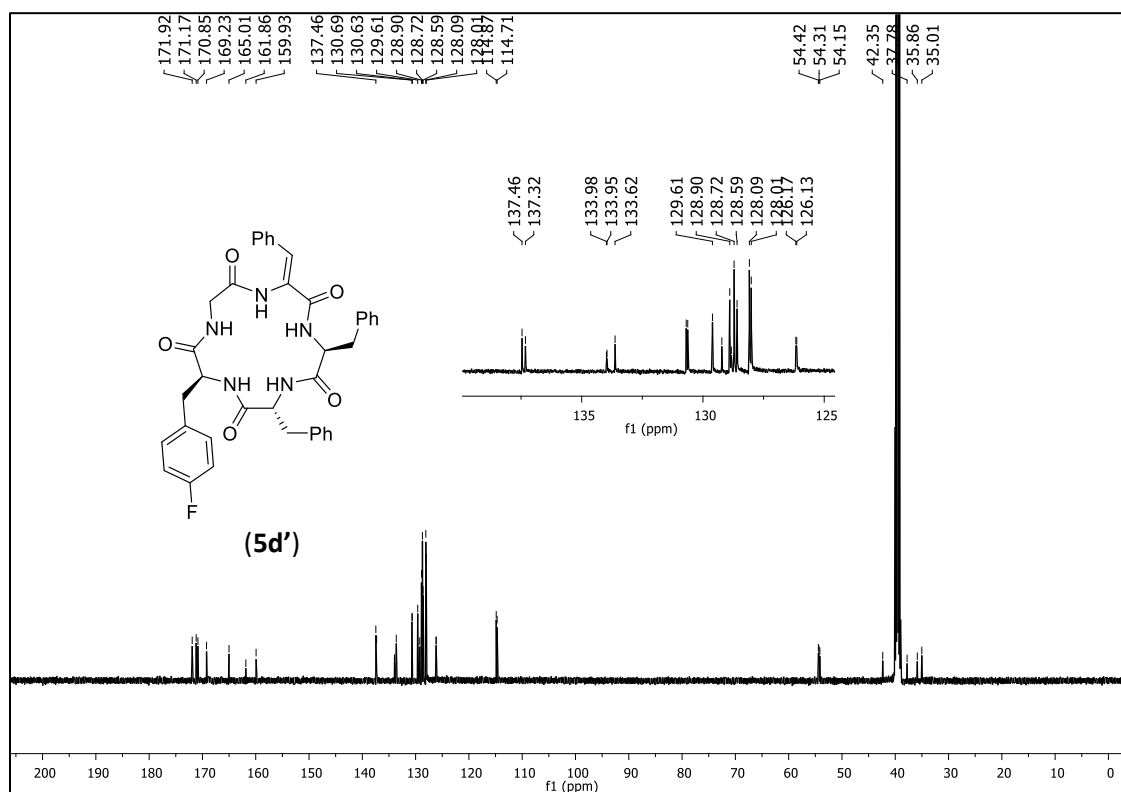

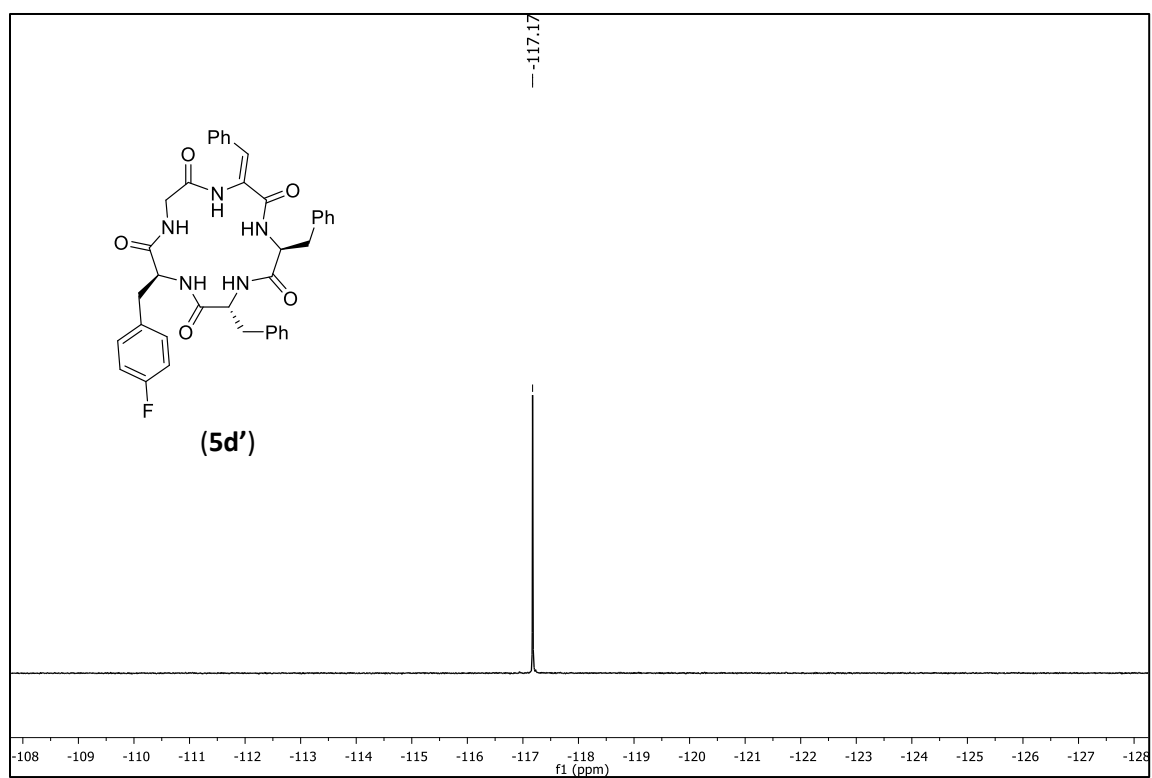

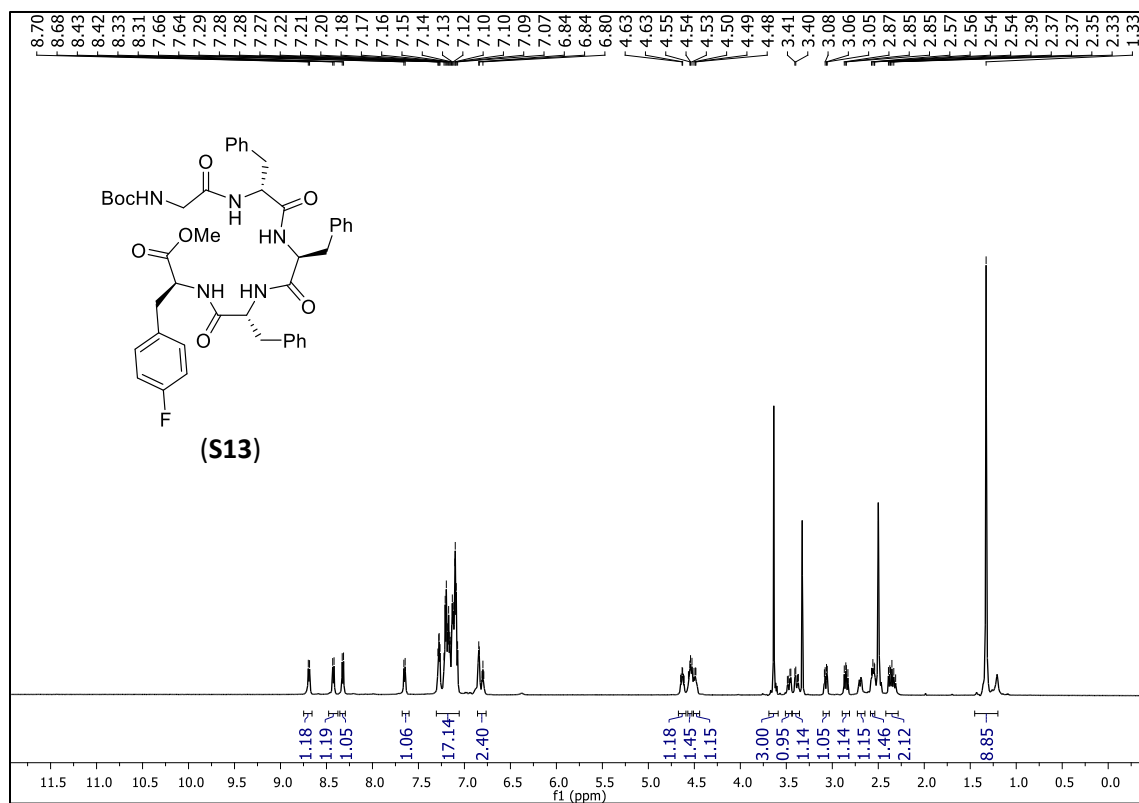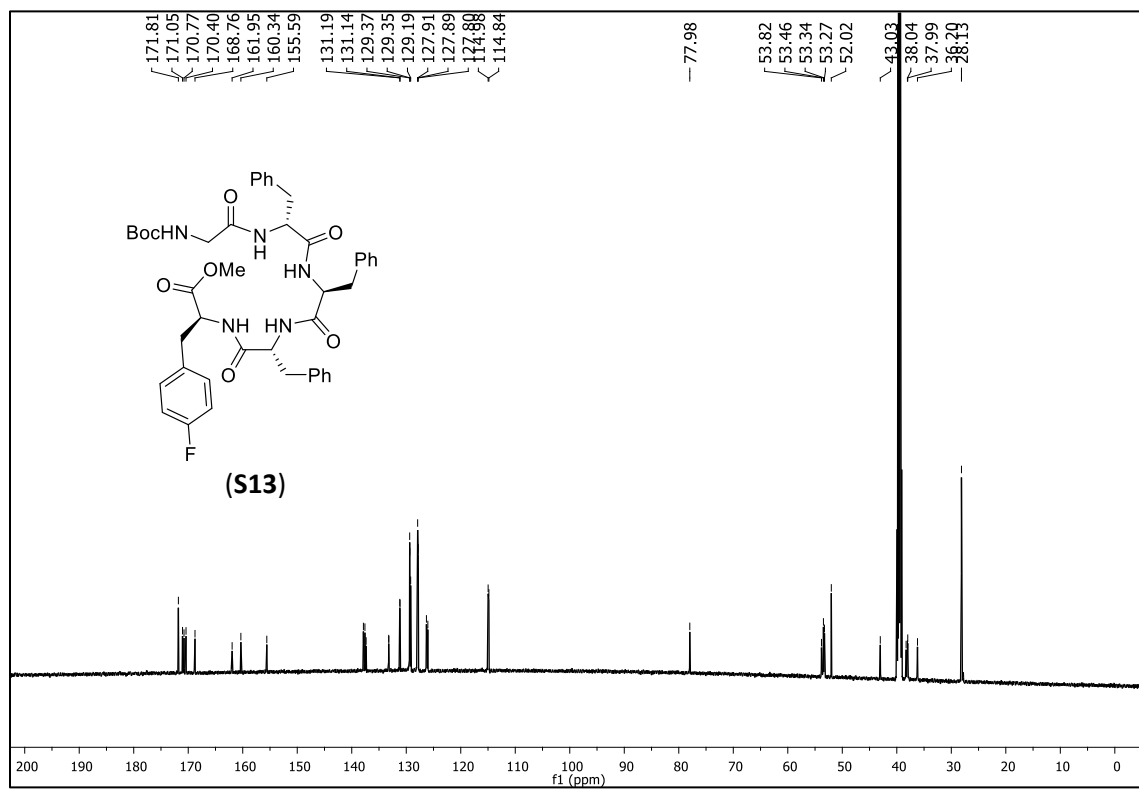

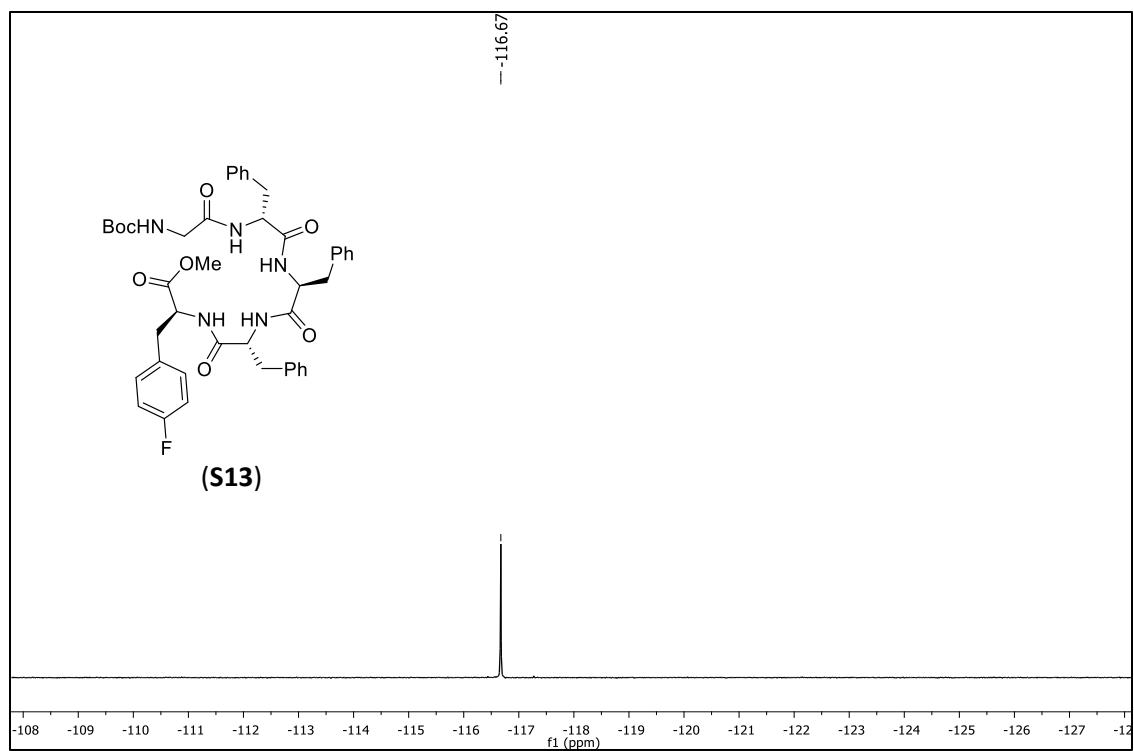

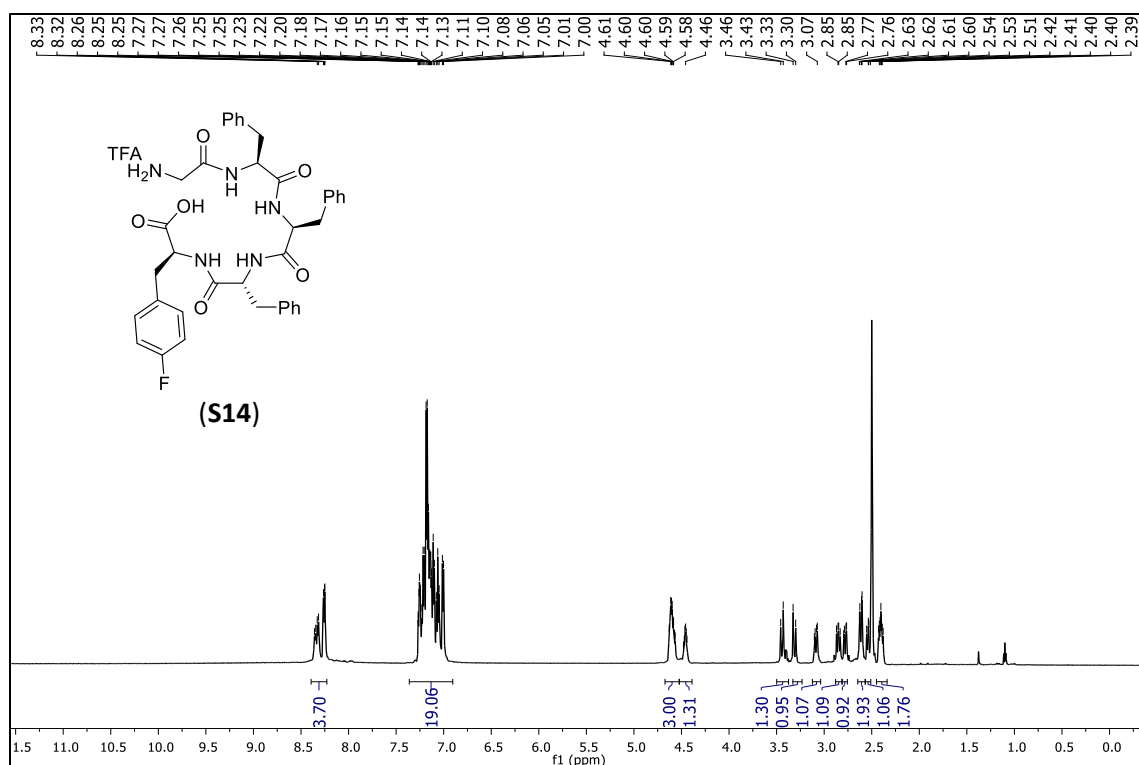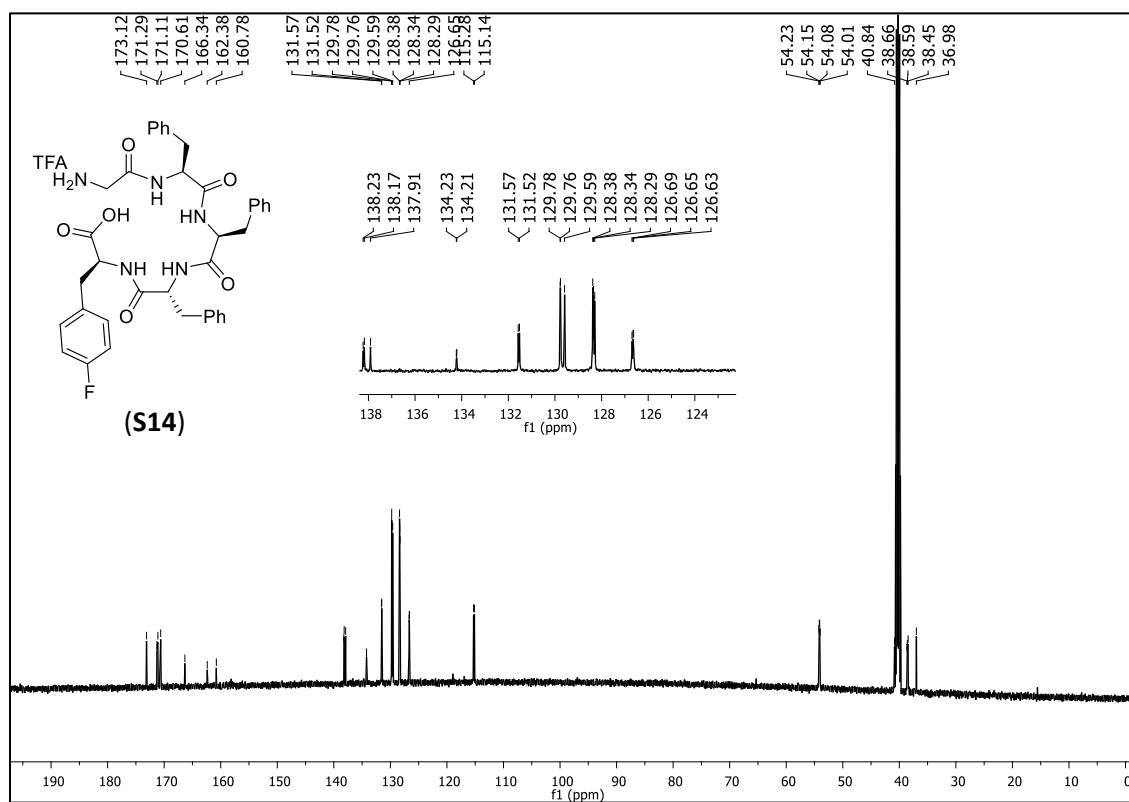

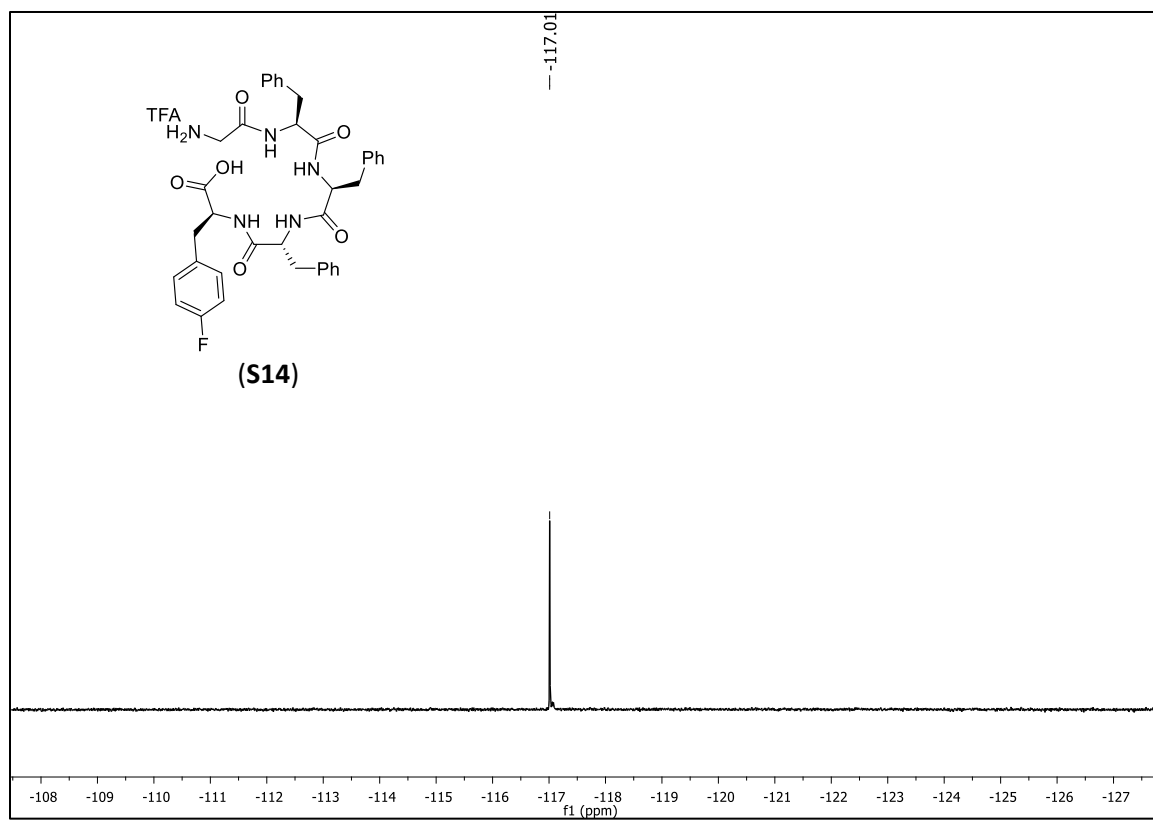

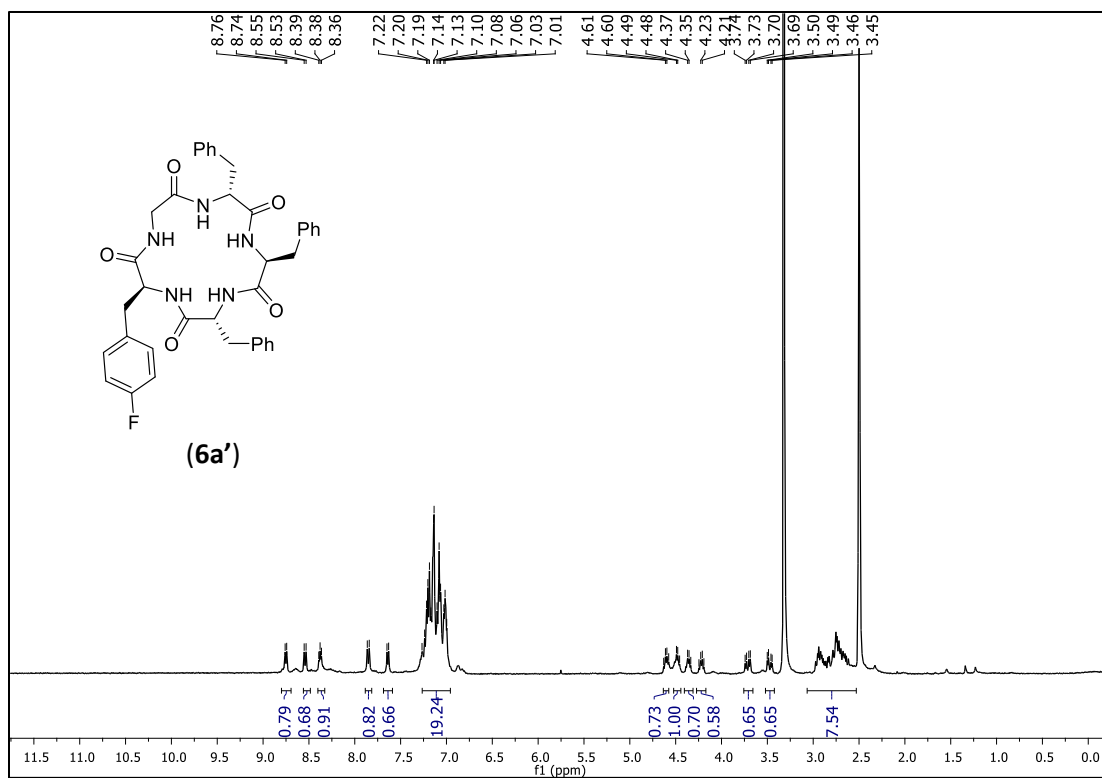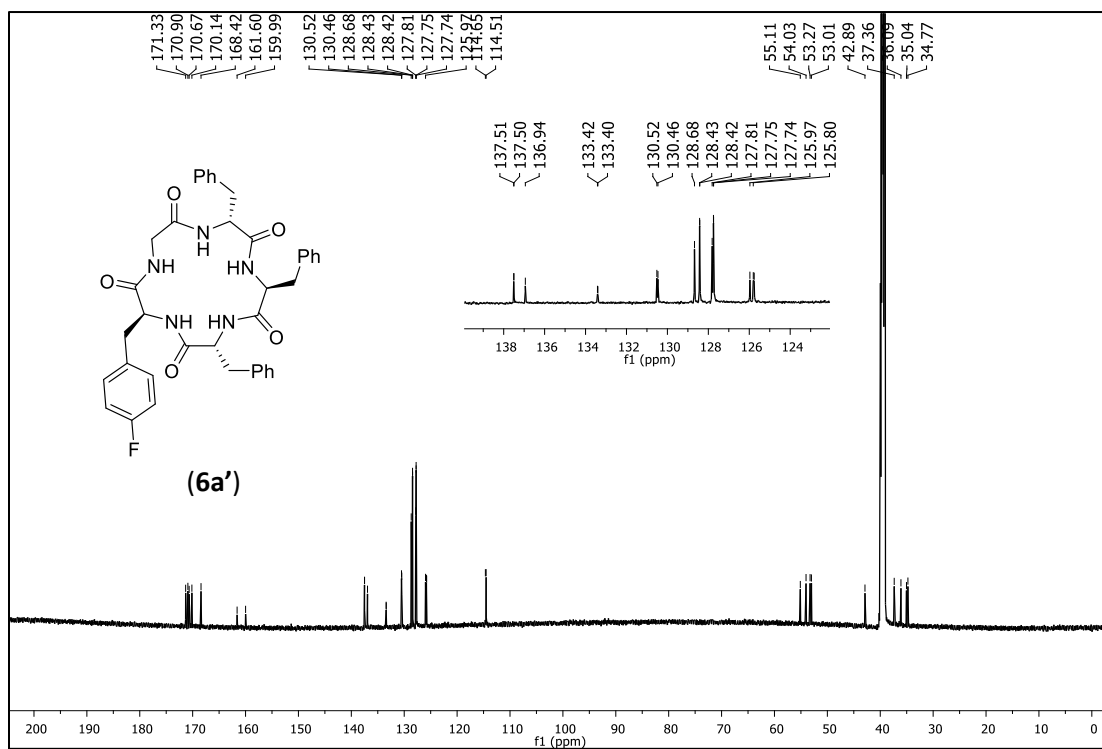

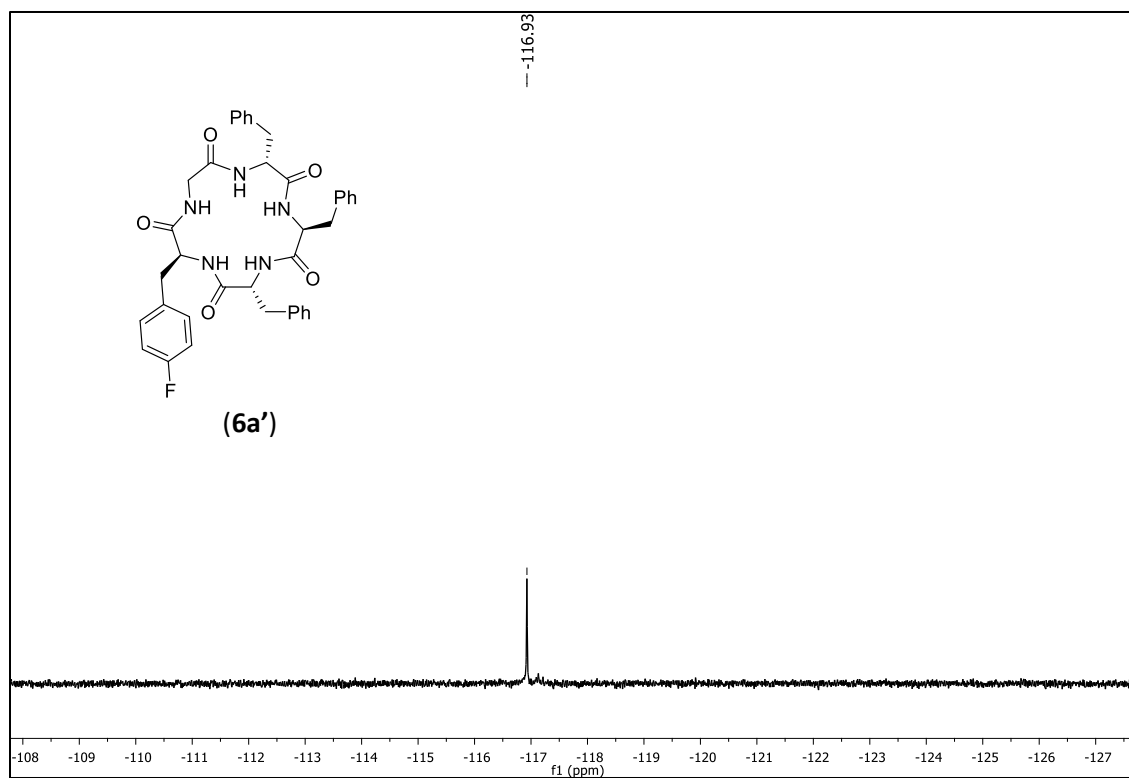

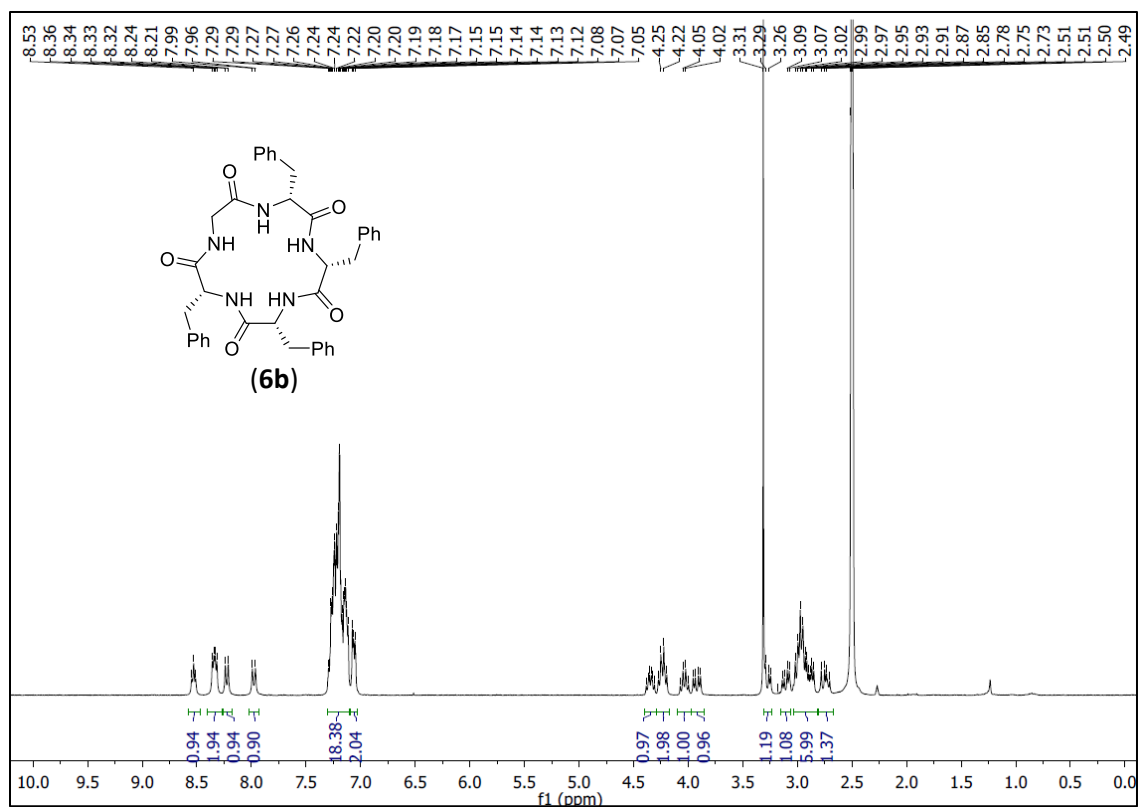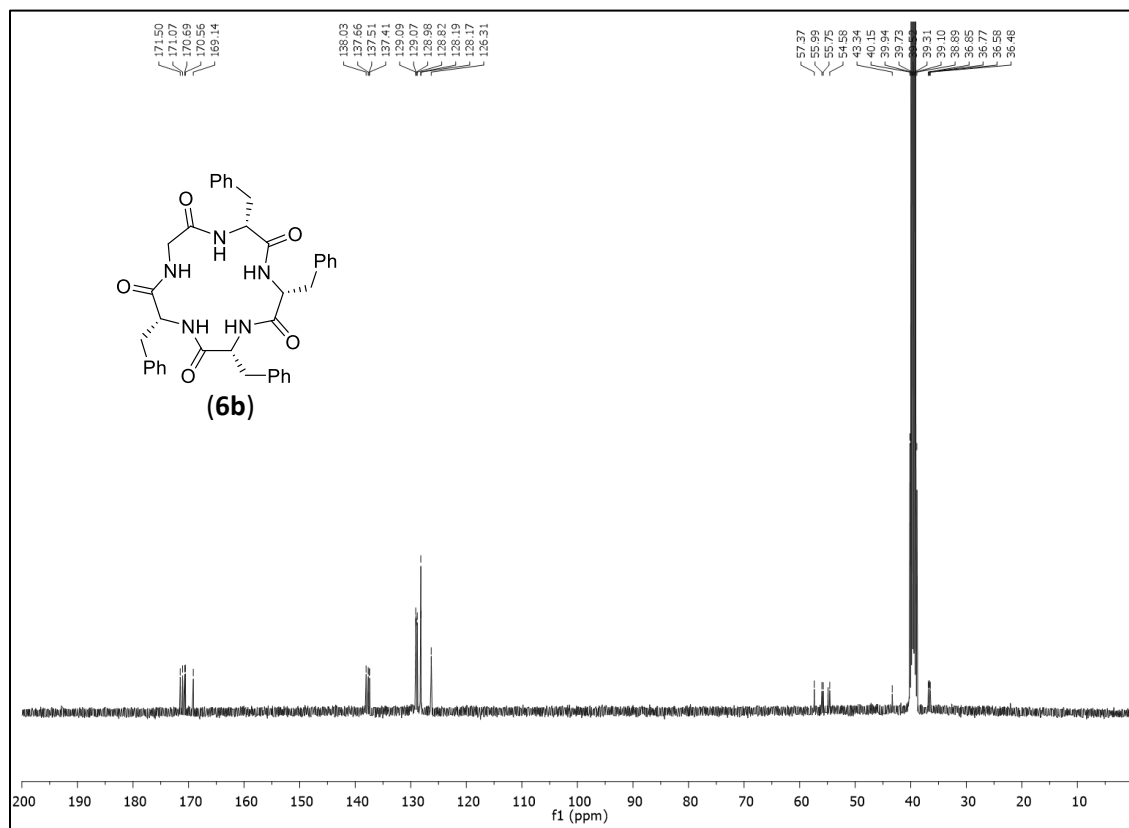

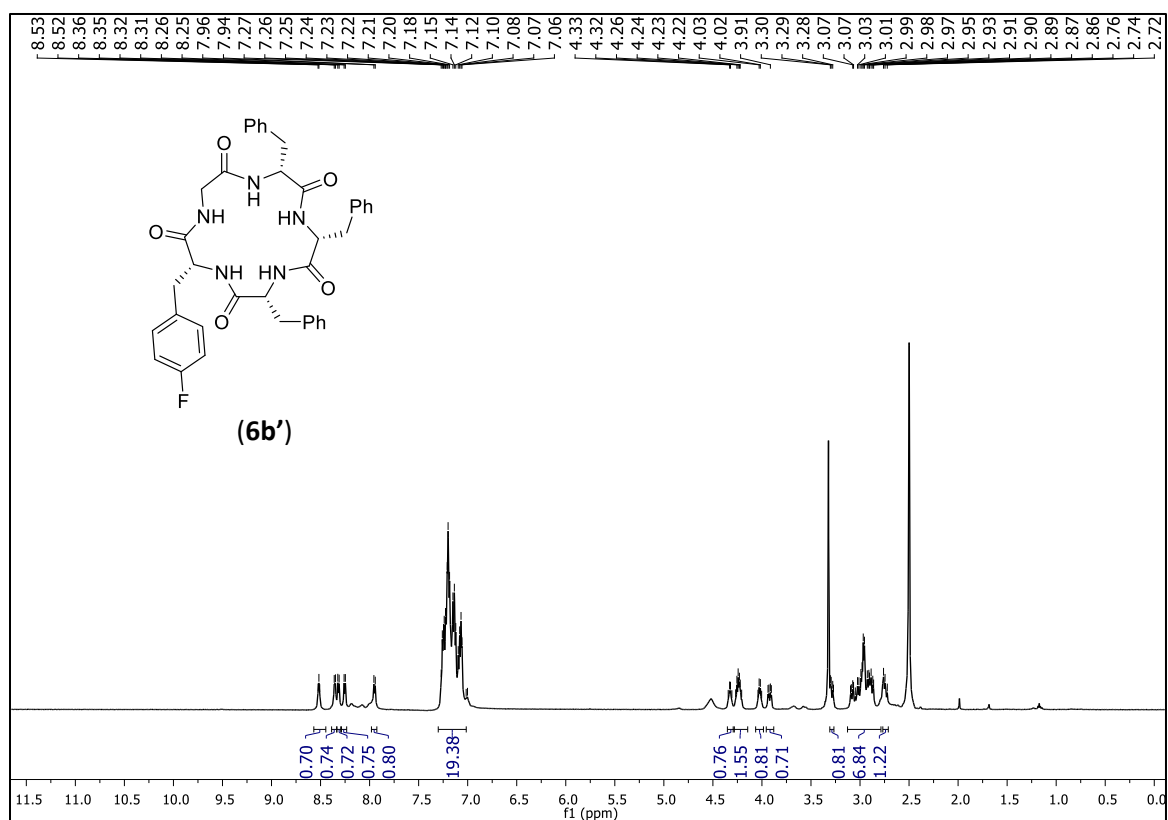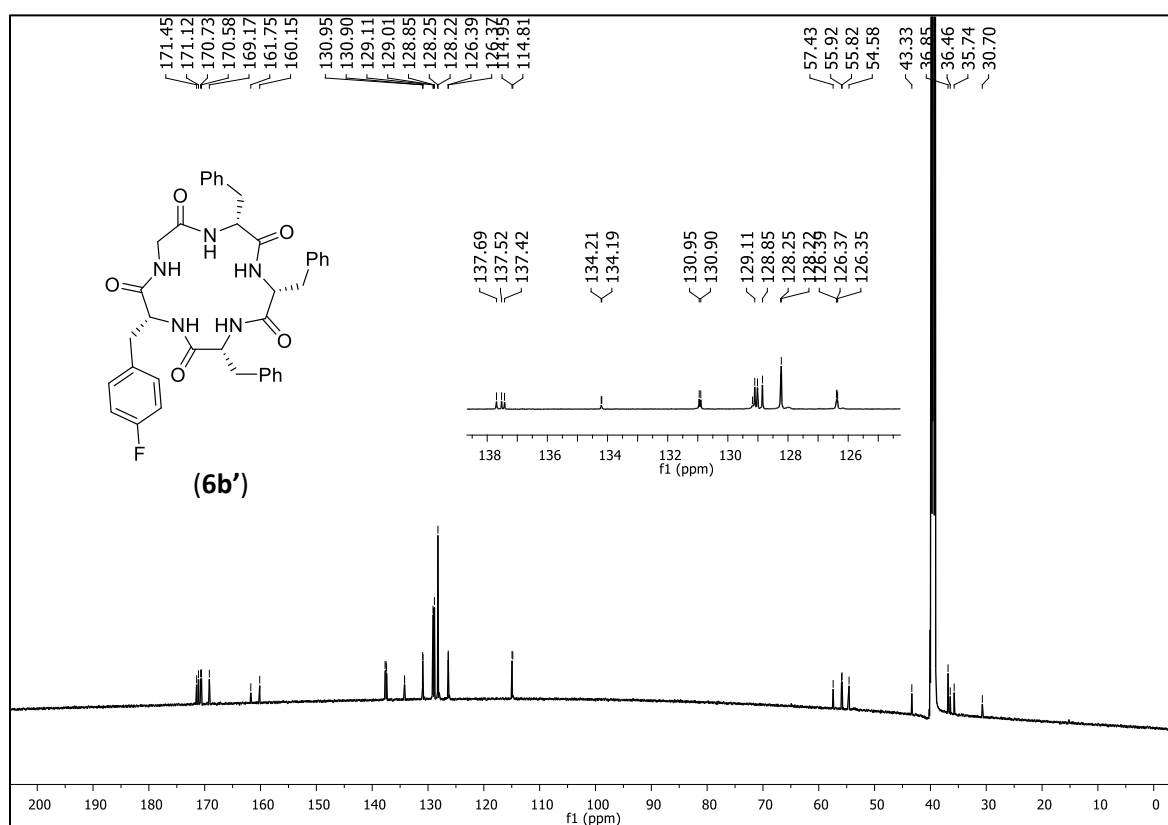

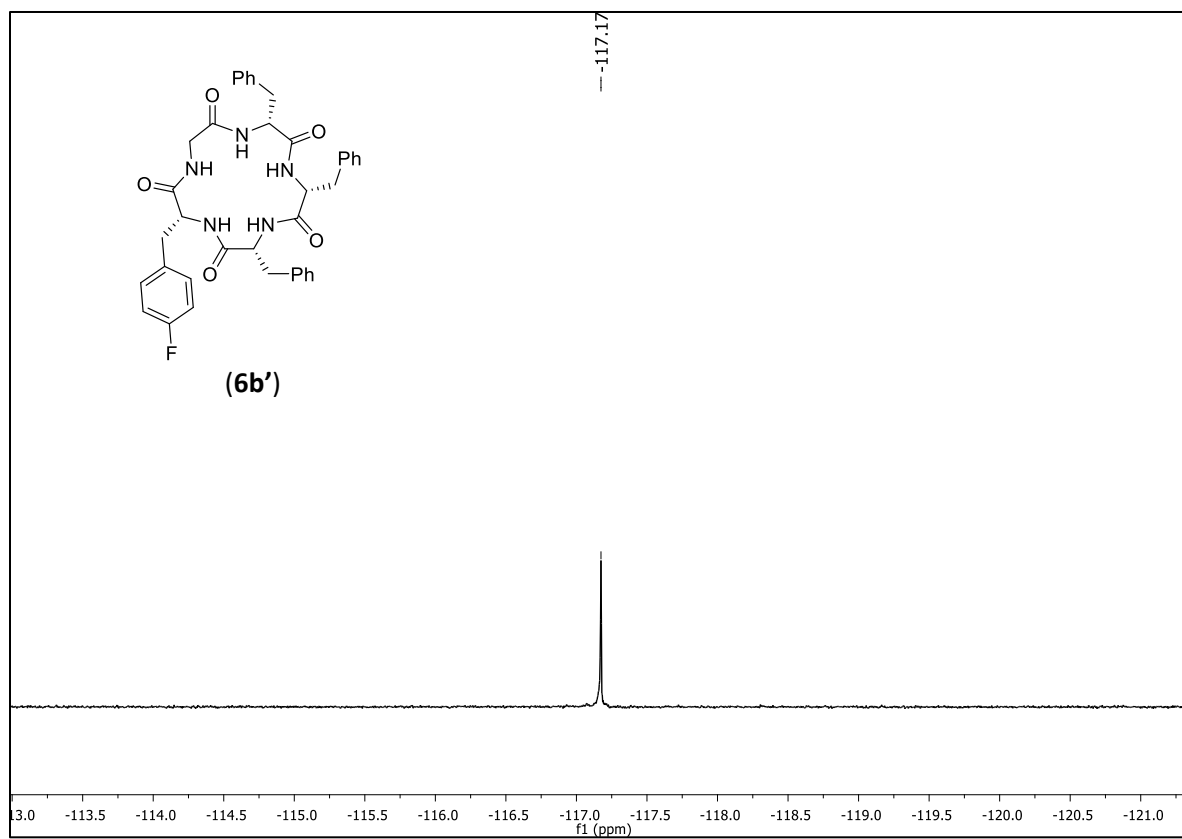

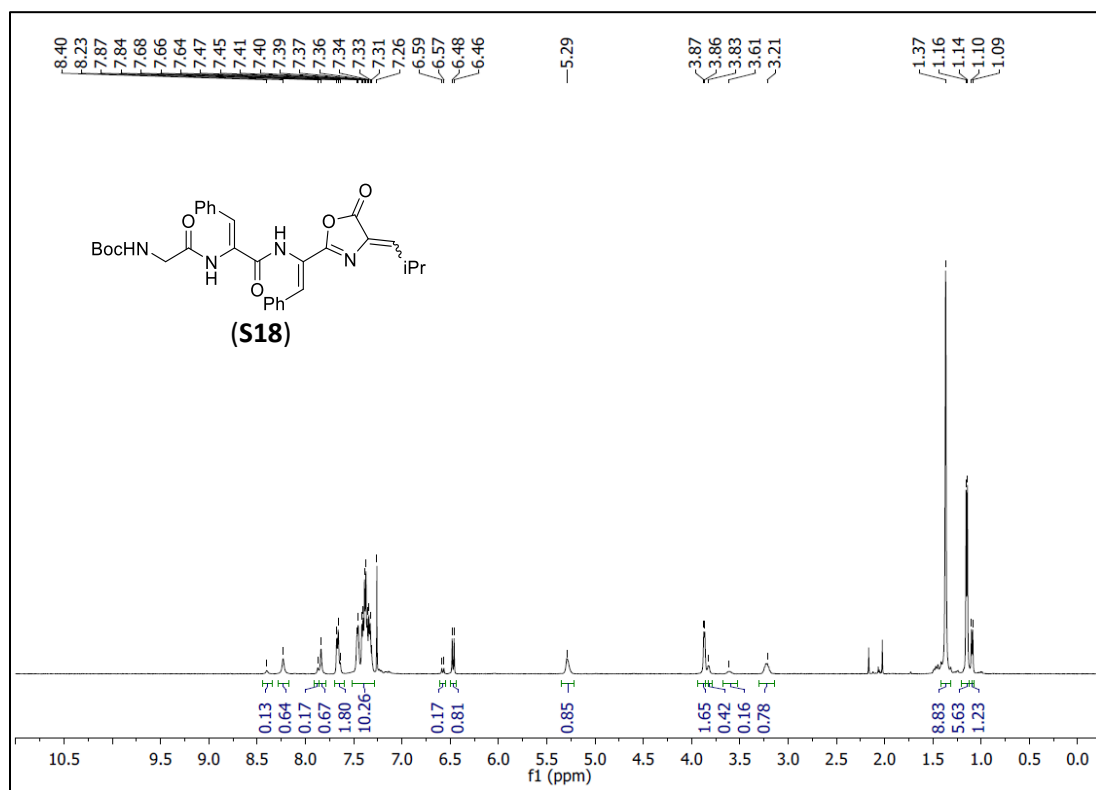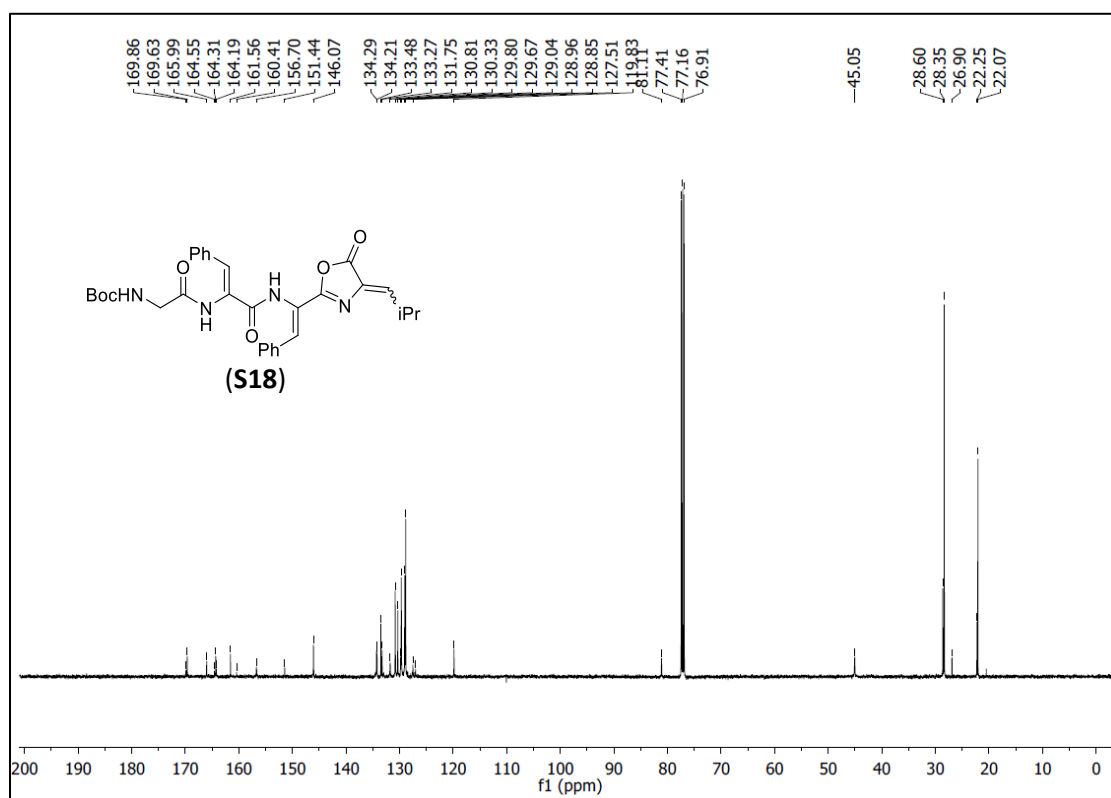

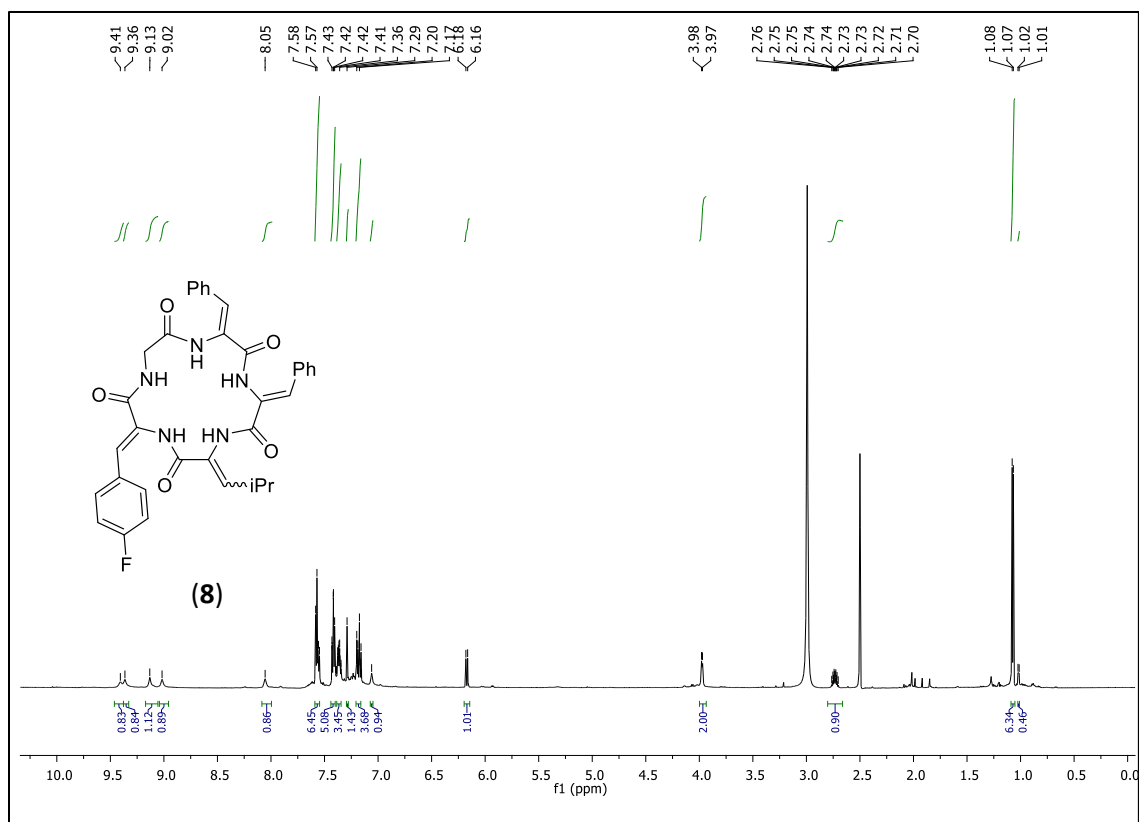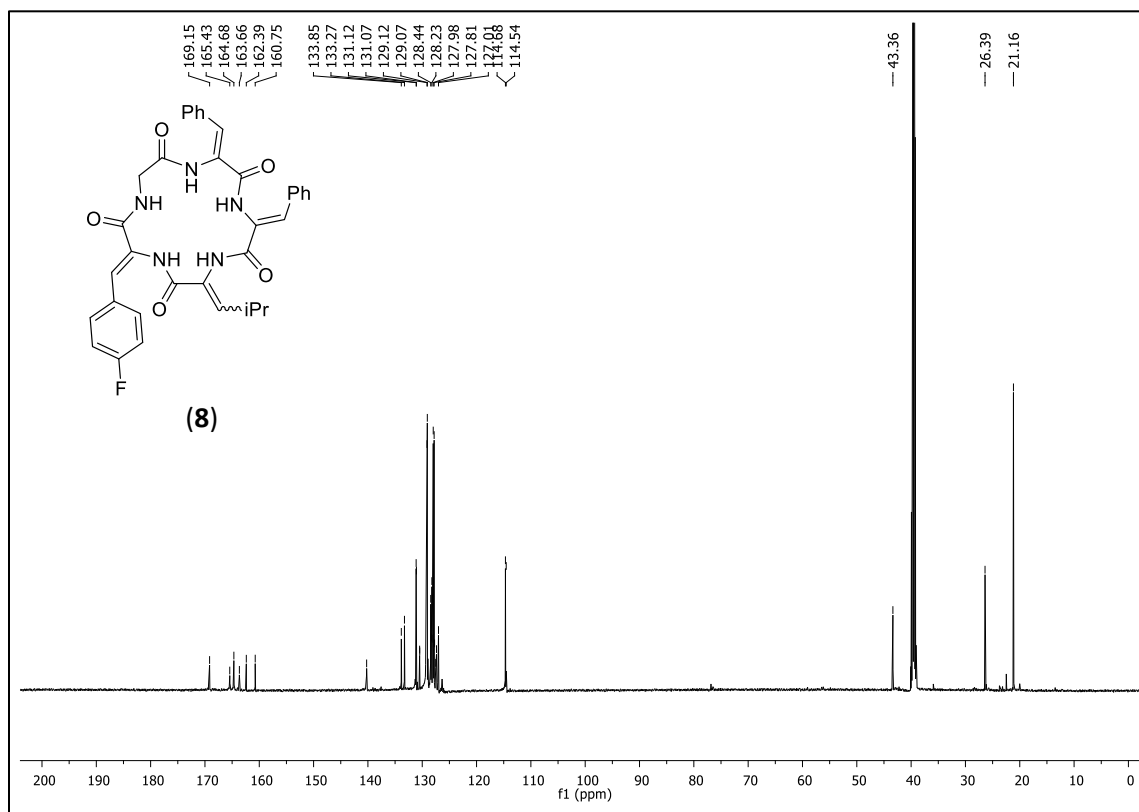

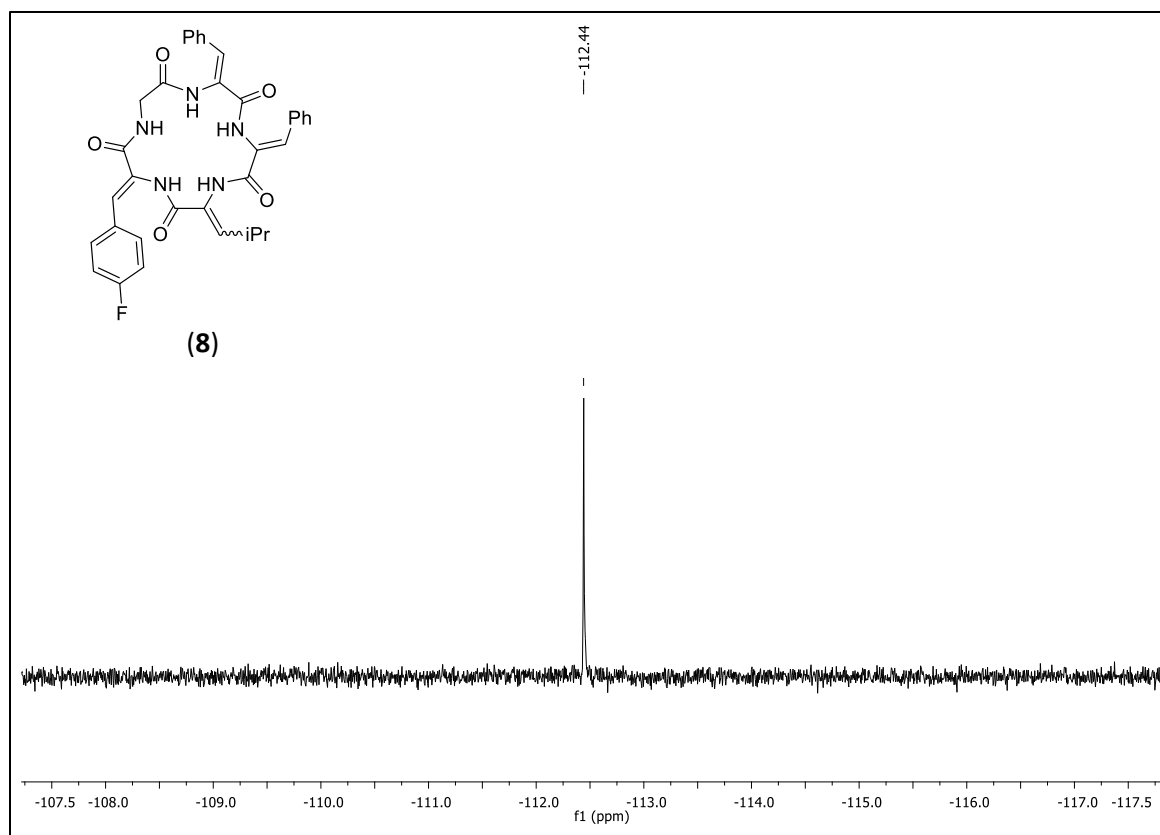

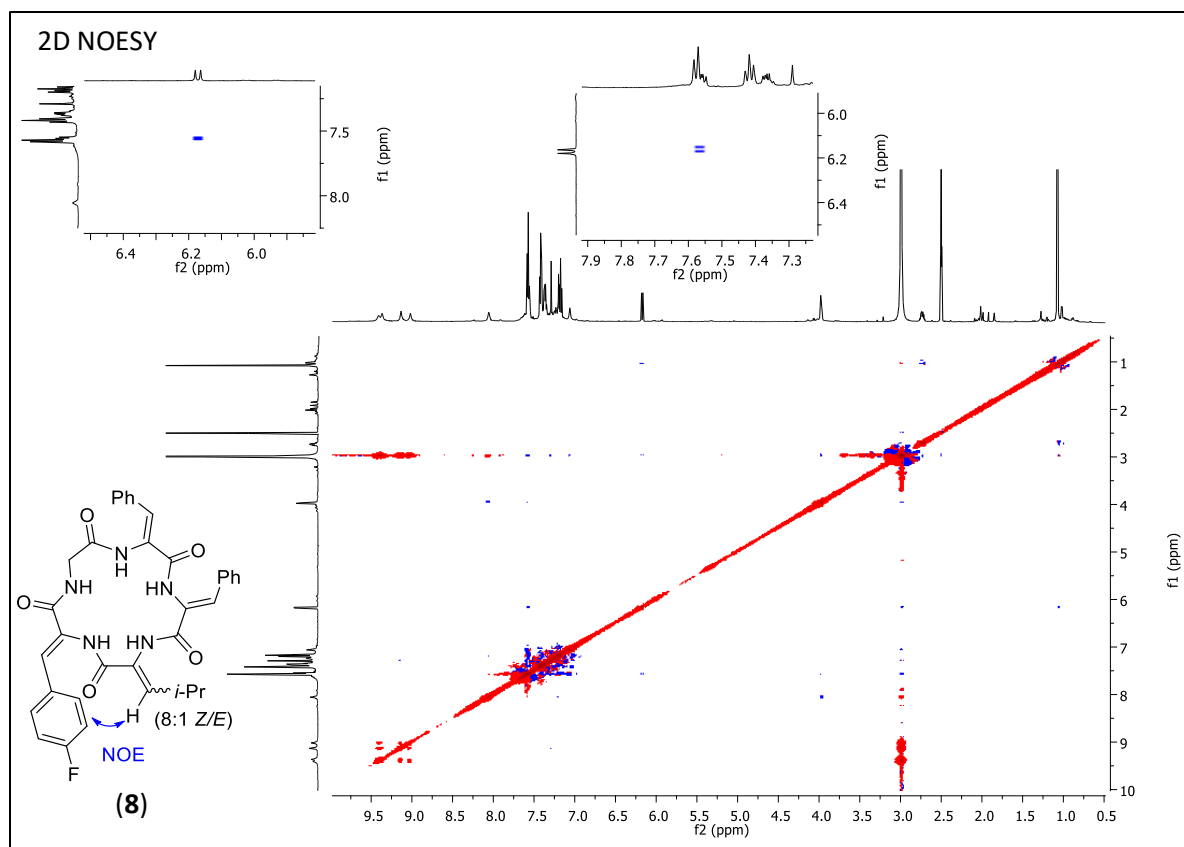

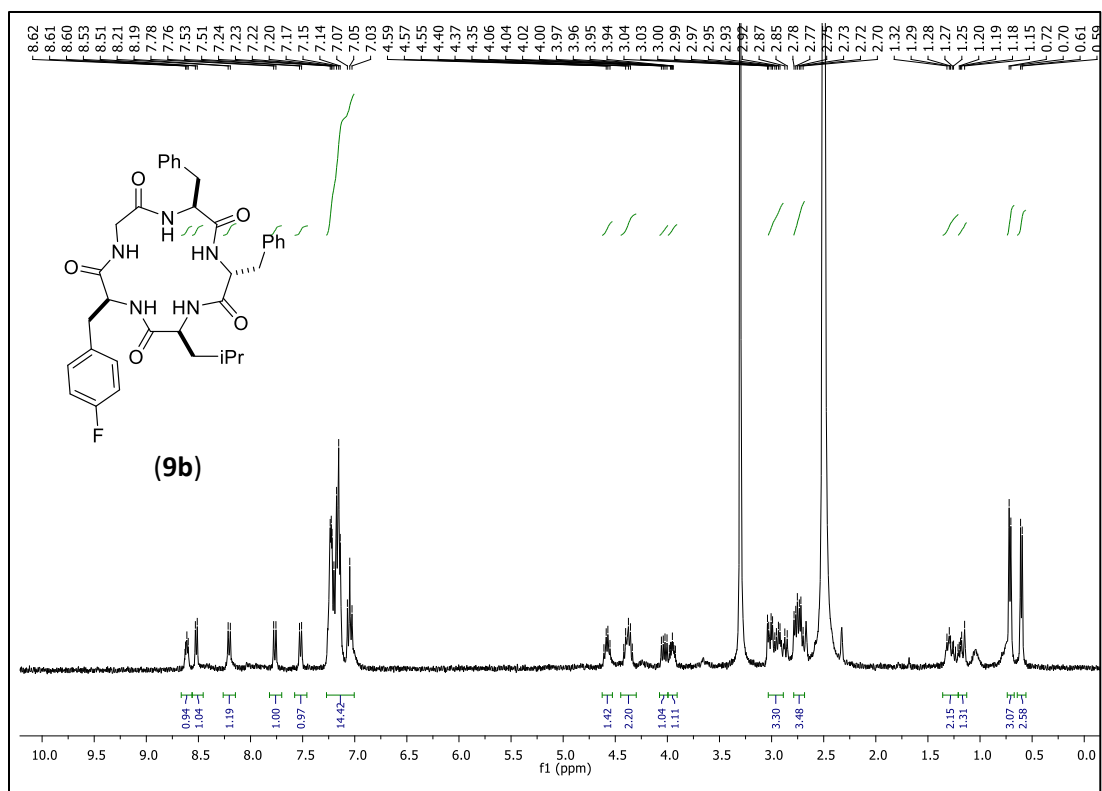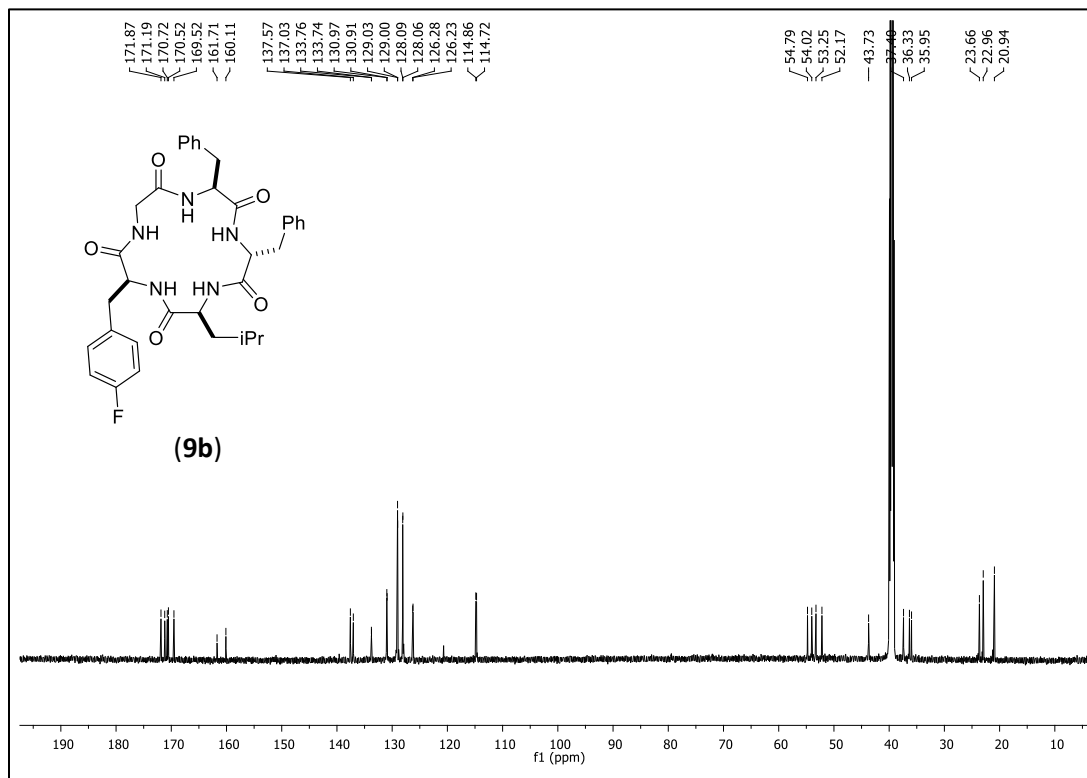

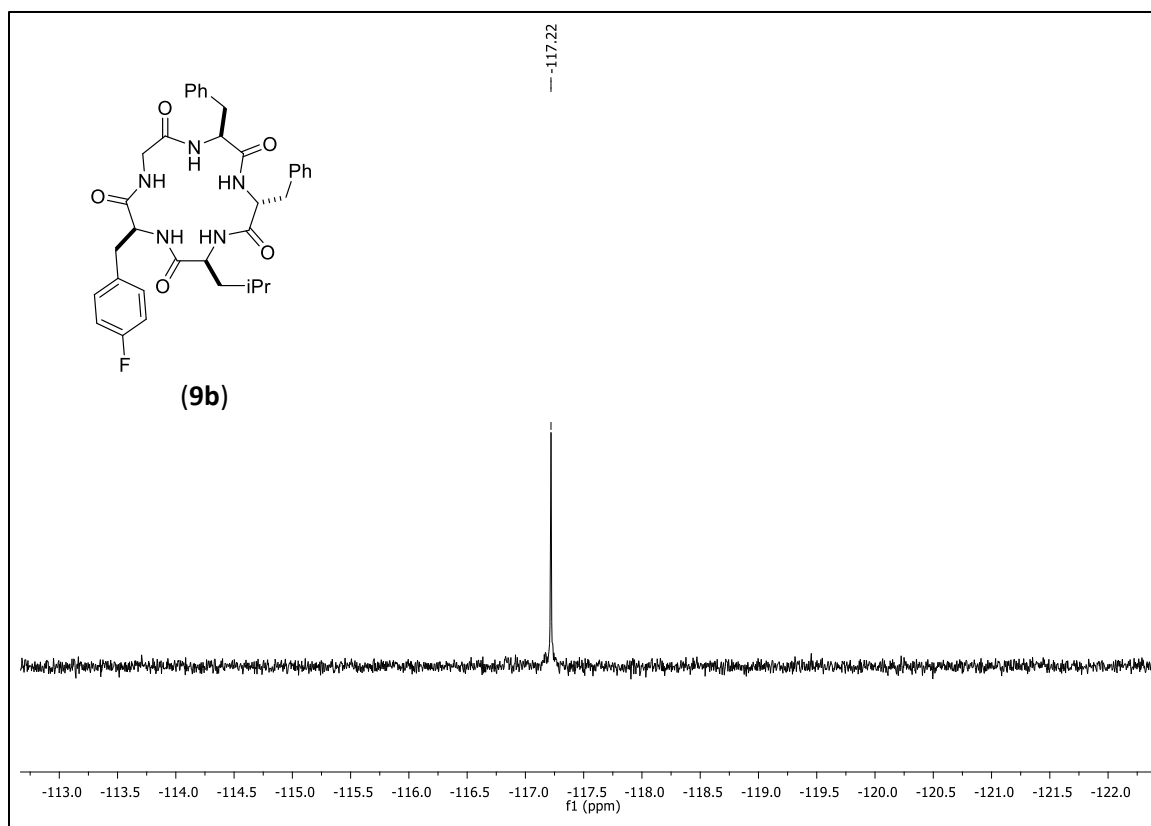

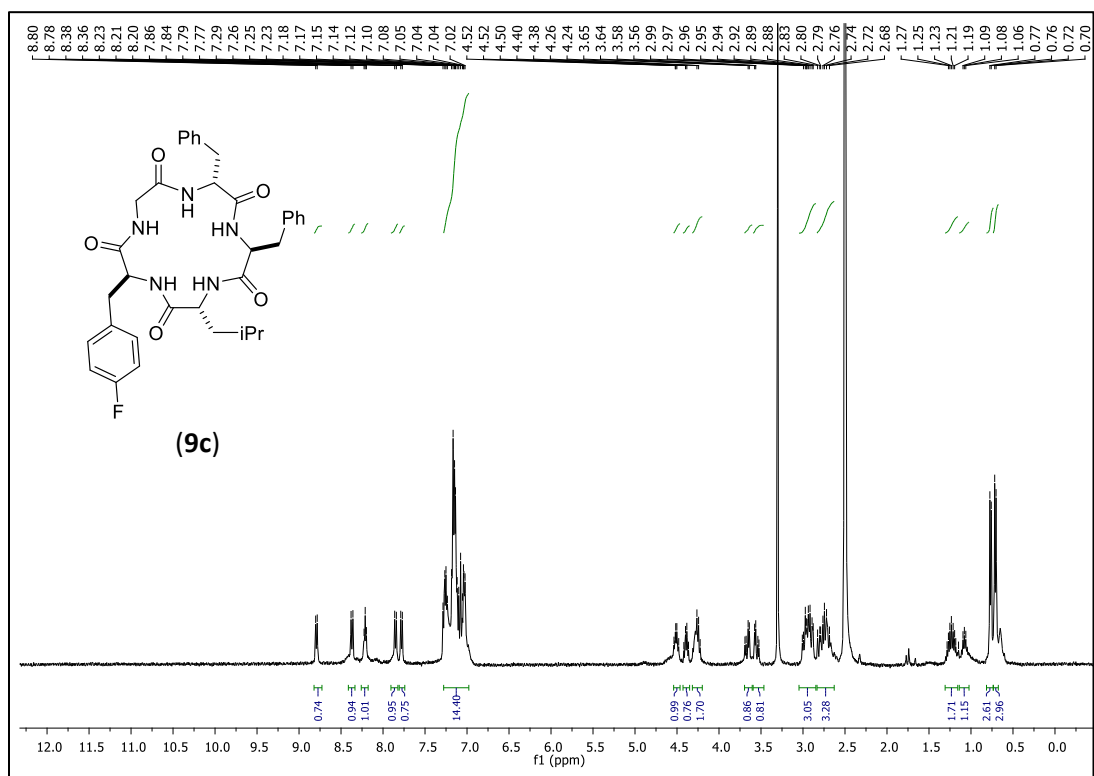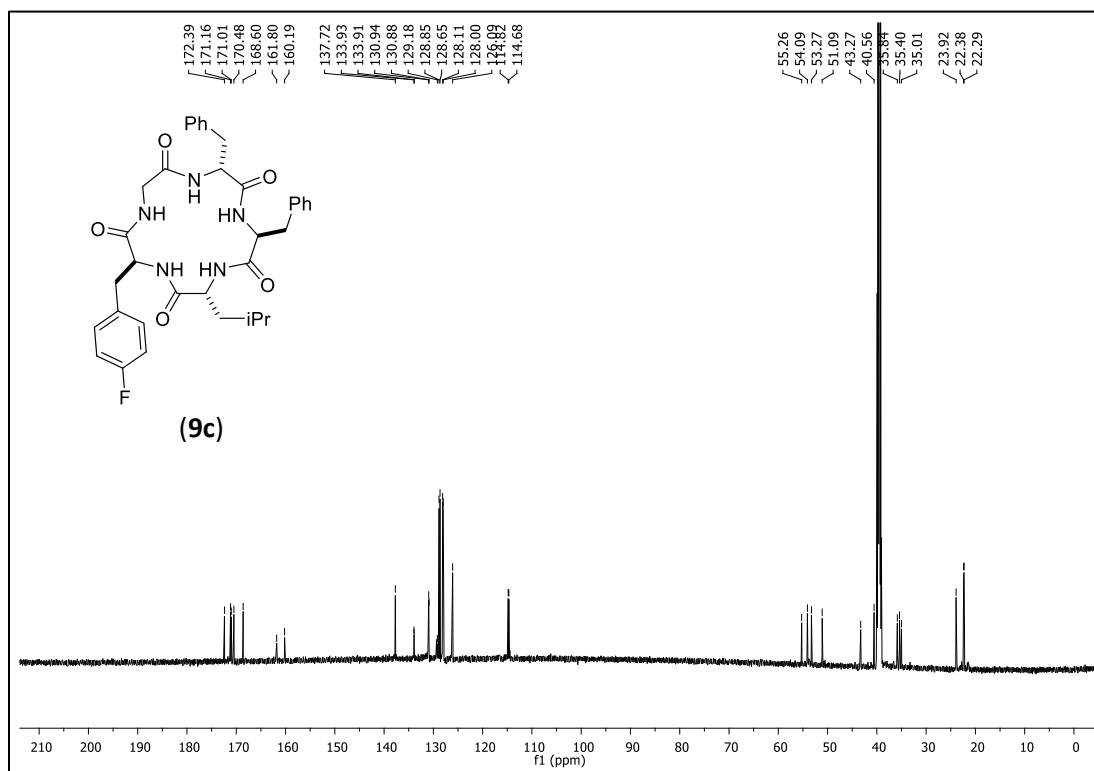

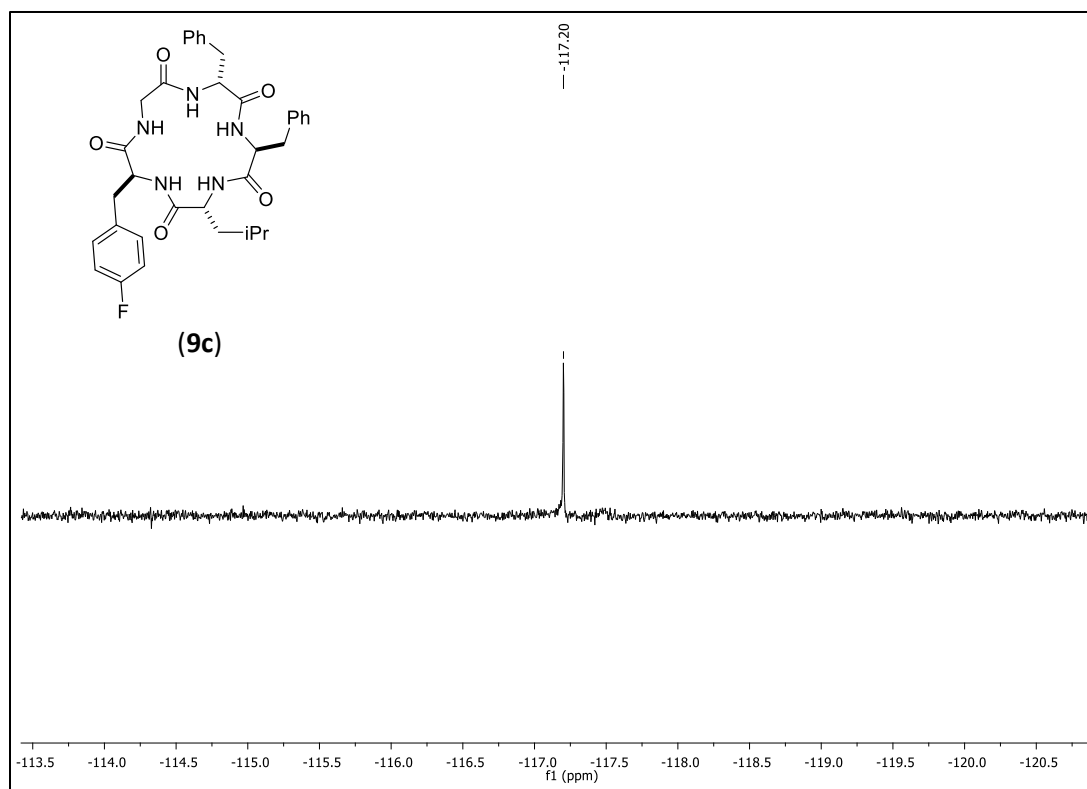

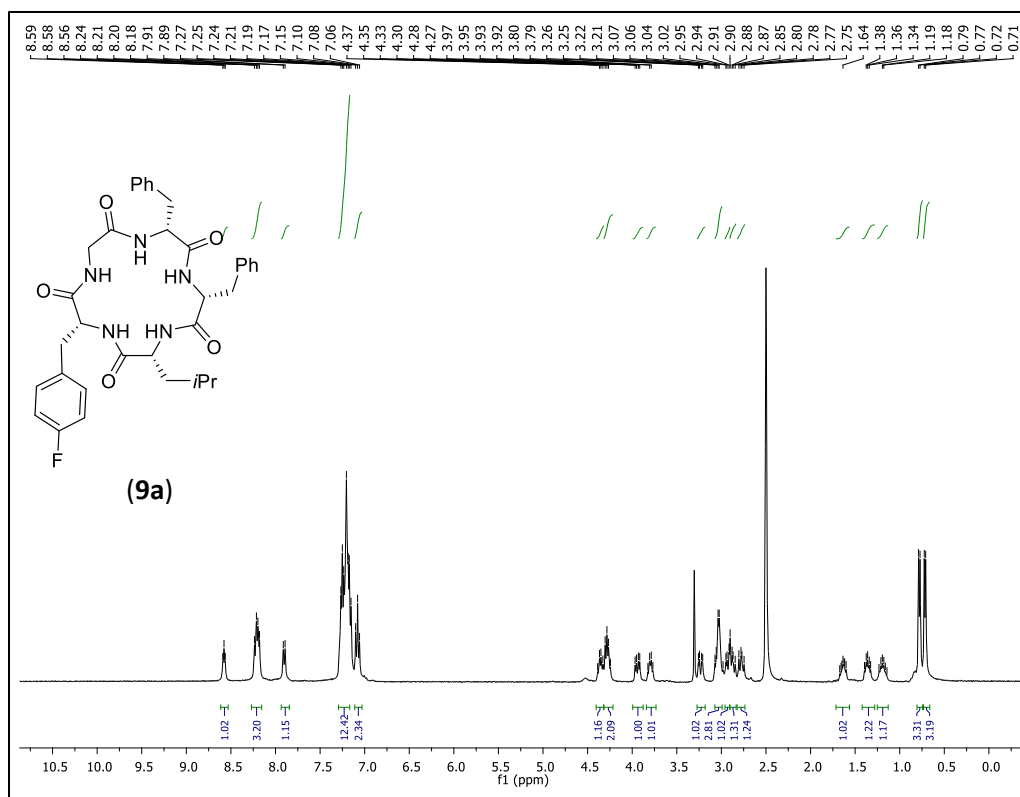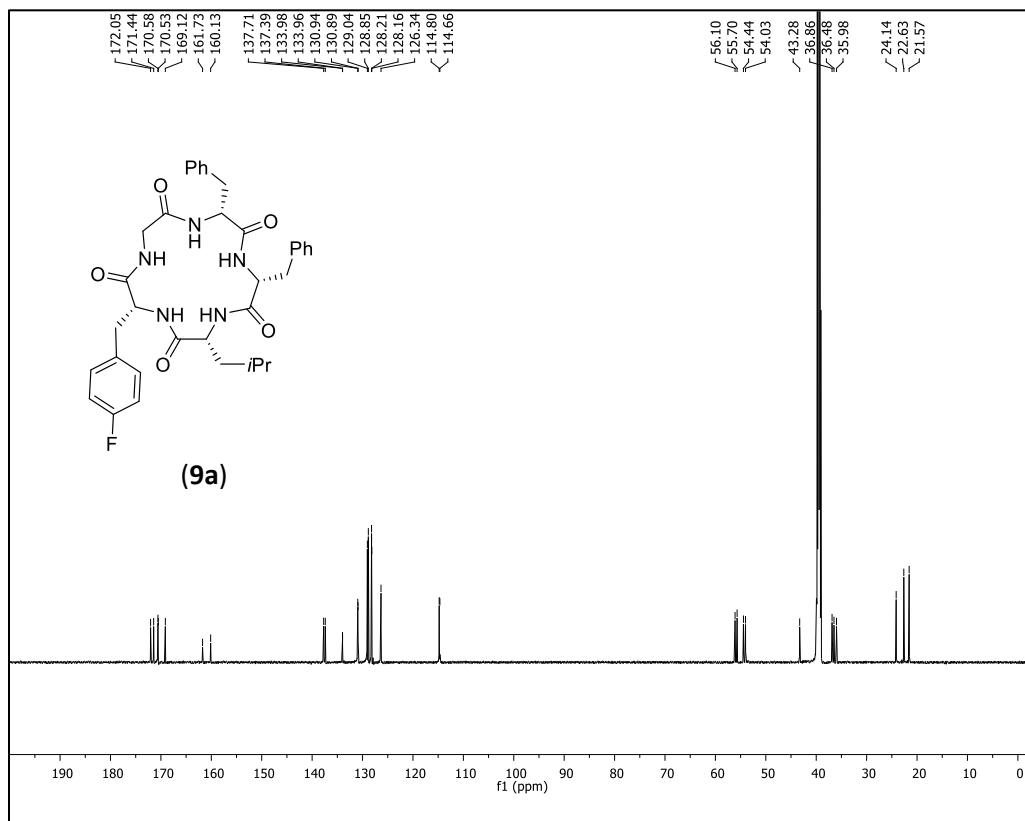

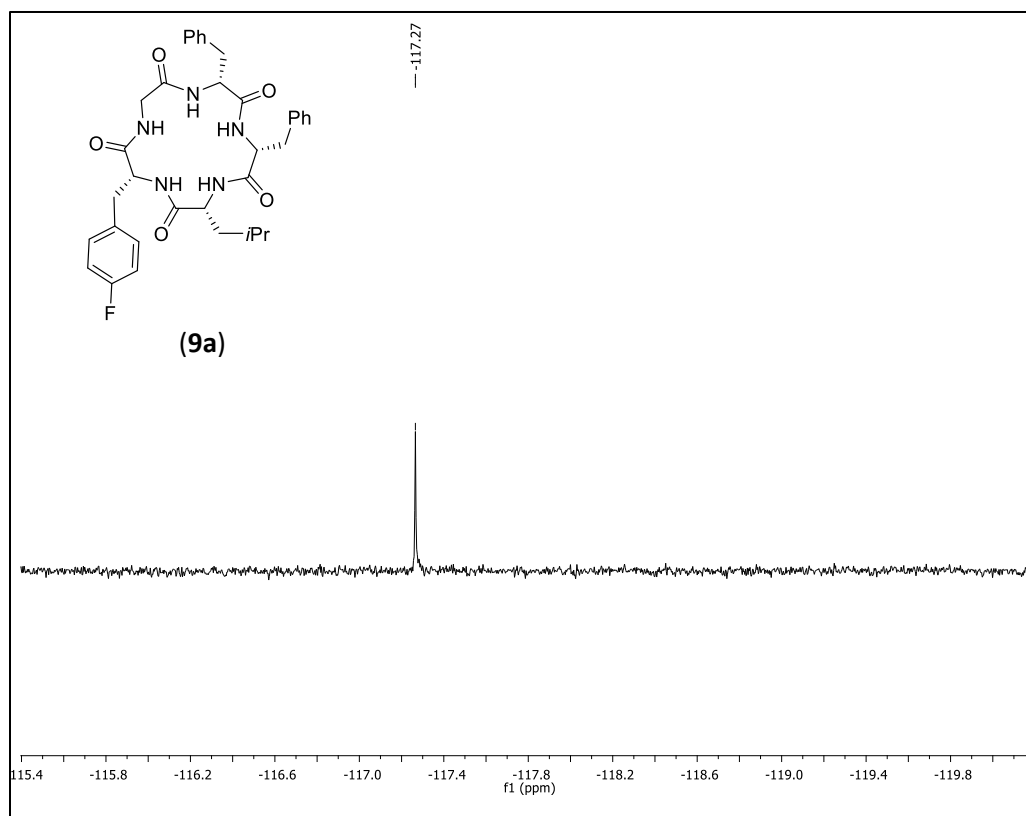

## 10. References

- 1 Waters 2795 Separations Module equipped with Symmetry® C18 column (3.5  $\mu$ m particle size; 4.6  $\times$  75 mm), Waters micromass ZQ mass spectrometer and Waters 2996 Photodiode Array Detector.
- 2 Armarego, W. L. F. & Chai, C. L. L. in *Purification of Laboratory Chemicals (Fifth Edition)* 1-52 (Butterworth-Heinemann, 2003).
- 3 Shiraiwa, T., Saijoh, R., Suzuki, M., Yoshida, K., Nishimura, S. & Nagasawa, H. Preparation of optically active *threo*-2-amino-3-hydroxy-3-phenylpropanoic acid (*threo*- $\beta$ -Phenylserine) via optical resolution. *Chem. Pharm. Bull.* **51**, 1363-1367, doi:10.1248/cpb.51.1363 (2003).
- 4 Miyata, O., Asai, H. & Naito, T. Stereoselective synthesis of  $\beta$ -hydroxyphenylalanines using imino 1,2-Wittig rearrangement of hydroximates. *Chem. Pharm. Bull.* **53**, 355-360 (2005).
- 5 Ferreira, P. M. T., Monteiro, L. S., Pereira, G., Ribeiro, L., Sacramento, J. & Silva, L. Reactivity of dehydroamino acids and dehydrideptides towards *N*-bromosuccinimide: Synthesis of  $\beta$ -bromo- and  $\beta,\beta$ -dibromodehydroamino acid derivatives and of substituted 4-imidazolidinones. *Eur. J. Org. Chem.* **2007**, 5934-5949 (2007).
- 6 Guo, Y.-M., Oike, H. & Aida, T. Chiroptical transcription of helical information through supramolecular harmonization with dynamic helices. *J. Am. Chem. Soc.* **126**, 716-717 (2004).
- 7 Monteiro, L. S., Andrade, J. J. & Suárez, A. C. Synthesis of new *N*-ethyl dehydroamino acid derivatives: *N*-Ethyl  $\beta,\beta$ -dibromo, *N*-ethyl  $\beta$ -bromo  $\beta$ -substituted, and *N*-ethyl  $\beta,\beta$ -disubstituted *N*-protected dehydroamino acid methyl esters. *Eur. J. Org. Chem.* **2011**, 6764-6772 (2011).
- 8 Balachandra, C. & Sharma, N. K. Synthesis and conformational analysis of new troponyl aromatic amino acid. *Tetrahedron* **70**, 7464-7469 (2014).
- 9 Carpino, L. A., Chao, H. G., Nowshad, F. & Shroff, H. Peptide coupling in the presence of so-called liquid crystal formers. *J. Org. Chem.* **53**, 6139-6144 (1988).
- 10 Donoghue, P. J., Helquist, P., Norrby, P.-O. & Wiest, O. Development of a Q2MM force field for the asymmetric rhodium catalyzed hydrogenation of enamides. *J. Chem. Theory Comput.* **4**, 1313-1323 (2008).
- 11 Donoghue, P. J., Helquist, P., Norrby, P.-O. & Wiest, O. Prediction of enantioselectivity in rhodium catalyzed hydrogenations. *J. Am. Chem. Soc.* **131**, 410-411 (2009).
- 12 Chang, G., Guida, W. C. & Still, W. C. An internal-coordinate Monte Carlo method for searching conformational space. *J. Am. Chem. Soc.* **111**, 4379-4386 (1989).
- 13 Saunders, M., Houk, K. N., Wu, Y. D., Still, W. C., Lipton, M., Chang, G. & Guida, W. C. Conformations of cycloheptadecane. A comparison of methods for conformational searching. *J. Am. Chem. Soc.* **112**, 1419-1427 (1990).
- 14 Kolossváry, I. & Guida, W. C. Low mode search. An efficient, automated computational method for conformational analysis: Application to cyclic and acyclic alkanes and cyclic peptides. *J. Am. Chem. Soc.* **118**, 5011-5019 (1996).
- 15 Kolossváry, I. & Guida, W. C. Low-mode conformational search elucidated: Application to C<sub>39</sub>H<sub>80</sub> and flexible docking of 9-deazaguanine inhibitors into PNP. *J. Comput. Chem.* **20**, 1671-1684 (1999).

- 16 Kolossváry, I. & Keserü, G. M. Hessian-free low-mode conformational search for large-scale protein loop optimization: application to c-jun *N*-terminal kinase JNK3. *J. Comput. Chem.* **22**, 21-30 (2001).
- 17 Keserü, G. M. & Kolossváry, I. Fully flexible low-mode docking: Application to induced fit in HIV integrase. *J. Am. Chem. Soc.* **123**, 12708-12709 (2001).
- 18 Grimme, S., Antony, J., Ehrlich, S. & Krieg, H. A consistent and accurate *ab initio* parametrization of density functional dispersion correction (DFT-D) for the 94 elements H-Pu. *J. Chem. Phys.* **132**, 154104 (2010).
- 19 Nagamitsu, T., Sunazuka, T., Tanaka, H., Ōmura, S., Sprengeler, P. A. & Smith, A. B. Total synthesis of (+)-Lactacystin. *J. Am. Chem. Soc.* **118**, 3584-3590 (1996).
- 20 Fauchère, J.-L., Charton, M., Kier, L. B., Verloop, A. & Pliska, V. Amino acid side chain parameters for correlation studies in biology and pharmacology. *International Journal of Peptide and Protein Research* **32**, 269-278 (1988).
