# Supplementary material
Source: PubMed Central journal article supplement (PMC6824594)
Supplement: NIHMS1026101-supplement-2.pdf [file NIHMS1026101-supplement-2.pdf]

### *Details of QM calculations*

Clustering was done on **1R<sup>TS</sup>**, **2R<sup>TS</sup>**, **3R<sup>TS</sup>**, **4R<sup>TS</sup>**, **1R2R<sup>TS</sup>** and **1R2S<sup>TS</sup>** (Supplementary Figure 8) to narrow down the conformational space to 5 representative conformers for each ensemble. Each of these representative conformers was fully optimized to a transition state using G09 and B3LYP/LANL2DZ/6-31G\* with Grimme's empirical dispersion.<sup>1</sup> Transition states were confirmed using harmonic frequency analysis. All 5 representatives were optimized to QM transition states for every conformer besides **1R<sup>TS</sup>**, for which only 4 transition states could be located. The coordinates, energies and frequencies are found in Supplementary Tables 3-31. Energies are reported in hartrees.

---

<sup>1</sup> Grimme, S., Antony, J., Ehrlich, S. & Krieg, H. A consistent and accurate *ab initio* parametrization of density functional dispersion correction (DFT-D) for the 94 elements H-Pu. *J. Chem. Phys.* **132**, 154104 (2010).

**Supplementary Table 3. O1R<sup>TS</sup> representative 1**

|   |            |           |           |
|---|------------|-----------|-----------|
| C | -1.640751  | 3.209351  | -1.671174 |
| C | -1.030605  | 3.339871  | -0.274604 |
| N | -3.022982  | 3.319411  | -1.761739 |
| C | -3.923325  | 2.823994  | -0.764066 |
| C | -4.826355  | 3.593614  | -0.110090 |
| C | -3.740025  | 1.371369  | -0.475296 |
| O | -2.684431  | 0.809050  | -0.786945 |
| N | -4.729091  | 0.643507  | 0.134794  |
| C | -4.479358  | -0.698638 | 0.487624  |
| C | -5.373372  | -1.699206 | 0.342571  |
| C | -6.705778  | -1.646727 | -0.270777 |
| C | -3.159907  | -0.906441 | 1.188309  |
| N | -0.433764  | 2.082521  | 0.127111  |
| C | -1.176821  | -2.467918 | 1.178259  |
| N | -2.447754  | -1.977936 | 0.746702  |
| O | -2.795550  | -0.140758 | 2.085016  |
| C | -0.973641  | -3.792670 | 1.330380  |
| O | -0.944073  | 3.093356  | -2.668768 |
| C | -5.118866  | 5.019403  | -0.191720 |
| C | -1.974930  | -4.860126 | 1.257630  |
| C | -3.289499  | -4.710684 | 1.741999  |
| C | -4.206683  | -5.752683 | 1.631014  |
| C | -3.834503  | -6.958830 | 1.028554  |
| C | -2.528853  | -7.127074 | 0.561732  |
| C | -1.603111  | -6.092460 | 0.689060  |
| C | -7.698056  | -2.526397 | 0.202043  |
| C | -8.979343  | -2.520802 | -0.343839 |
| C | -9.291832  | -1.647238 | -1.388793 |
| C | -8.310487  | -0.787395 | -1.888810 |
| C | -7.030583  | -0.783897 | -1.337405 |
| C | -6.122643  | 5.518408  | 0.666502  |
| C | -6.466214  | 6.866557  | 0.663879  |
| C | -5.810372  | 7.748439  | -0.198464 |
| C | -4.811731  | 7.272045  | -1.054501 |
| C | -4.466390  | 5.924594  | -1.057199 |
| H | -1.777526  | 3.671615  | 0.457274  |
| H | -0.241088  | 4.093374  | -0.325556 |
| H | -3.333911  | 3.204194  | -2.723934 |
| H | -5.427182  | 3.074002  | 0.634711  |
| H | -5.680768  | 0.984610  | 0.174065  |
| H | -5.099147  | -2.654697 | 0.784324  |
| H | -1.003583  | 1.259166  | -0.029996 |
| H | -2.796377  | -2.426094 | -0.094883 |
| H | 0.062518   | -4.100988 | 1.442701  |
| H | -3.572091  | -3.789410 | 2.239825  |
| H | -5.211409  | -5.630096 | 2.026231  |
| H | -4.553496  | -7.767913 | 0.939225  |
| H | -2.228651  | -8.067291 | 0.108499  |
| H | -0.583856  | -6.230321 | 0.336335  |
| H | -7.458492  | -3.210792 | 1.012253  |
| H | -9.733181  | -3.200923 | 0.041905  |
| H | -10.289126 | -1.645317 | -1.818664 |
| H | -8.539763  | -0.124741 | -2.718579 |
| H | -6.266546  | -0.142836 | -1.765674 |
| H | -6.634095  | 4.836353  | 1.341727  |
| H | -7.241615  | 7.229127  | 1.331997  |
| H | -6.075066  | 8.801848  | -0.204274 |
| H | -4.300272  | 7.956768  | -1.724727 |
| H | -3.689923  | 5.566301  | -1.720101 |

|    |           |           |           |
|----|-----------|-----------|-----------|
| C  | 3.633837  | 2.454805  | -1.099974 |
| C  | 1.895231  | 1.221448  | -2.591100 |
| P  | 1.922907  | -0.464951 | -1.840573 |
| P  | 4.266241  | 1.102383  | -0.006033 |
| C  | 4.628159  | -3.133087 | -4.520386 |
| C  | 4.229876  | -3.560218 | -3.250521 |
| C  | 3.425756  | -2.742066 | -2.458491 |
| C  | 2.995091  | -1.490213 | -2.929411 |
| C  | 3.383753  | -1.079157 | -4.211715 |
| C  | 4.203527  | -1.892660 | -4.997486 |
| H  | 3.158620  | -3.061788 | -1.455336 |
| H  | 3.059438  | -0.124021 | -4.610771 |
| C  | -2.229145 | -2.351451 | -2.769321 |
| C  | -1.196954 | -3.121046 | -2.220093 |
| C  | 0.032852  | -2.533652 | -1.930901 |
| C  | 0.253570  | -1.167842 | -2.186788 |
| C  | -0.787279 | -0.400809 | -2.728802 |
| C  | -2.018086 | -0.996163 | -3.017945 |
| H  | 0.818189  | -3.137928 | -1.493264 |
| H  | -0.669431 | 0.660190  | -2.916997 |
| C  | 8.134532  | -0.030820 | -2.302247 |
| C  | 7.143894  | -0.995527 | -2.123681 |
| C  | 5.987019  | -0.688263 | -1.403739 |
| C  | 5.805651  | 0.589564  | -0.866709 |
| C  | 6.814142  | 1.555997  | -1.041228 |
| C  | 7.970142  | 1.245344  | -1.753353 |
| H  | 5.226087  | -1.443571 | -1.265818 |
| H  | 6.705400  | 2.545492  | -0.605350 |
| C  | 5.827641  | 3.032163  | 3.898464  |
| C  | 6.262439  | 1.764212  | 3.498298  |
| C  | 5.794202  | 1.210142  | 2.309710  |
| C  | 4.885966  | 1.921851  | 1.507251  |
| C  | 4.446928  | 3.189775  | 1.913172  |
| C  | 4.923513  | 3.739999  | 3.106573  |
| H  | 6.136715  | 0.226198  | 2.000859  |
| H  | 3.714310  | 3.734897  | 1.332052  |
| H  | -3.187019 | -2.808693 | -3.003846 |
| H  | 5.264878  | -3.764310 | -5.133633 |
| H  | 6.192413  | 3.463392  | 4.826360  |
| H  | 9.035400  | -0.269493 | -2.860489 |
| H  | 4.507517  | -1.554107 | -5.983831 |
| H  | 4.555473  | -4.524870 | -2.871324 |
| H  | -2.816093 | -0.384731 | -3.427237 |
| H  | -1.349807 | -4.177204 | -2.013752 |
| H  | 8.744615  | 1.996872  | -1.877087 |
| H  | 7.259722  | -1.989992 | -2.544474 |
| H  | 4.578686  | 4.722369  | 3.416194  |
| H  | 6.966226  | 1.209031  | 4.111618  |
| Rh | 2.656525  | -0.457100 | 0.447539  |
| O  | 1.144132  | -2.019358 | 0.847778  |
| C  | 0.013101  | -1.562507 | 1.165154  |
| N  | -0.165198 | -0.268117 | 1.454174  |
| C  | 0.936039  | 0.653758  | 1.480728  |
| C  | 1.935520  | 0.488154  | 2.477593  |
| H  | -1.074789 | -0.003552 | 1.861294  |
| H  | 3.787827  | -1.498595 | 0.115380  |
| H  | 3.256993  | -0.497295 | 1.968358  |
| H  | 2.545633  | 1.375222  | 2.629844  |
| C  | 0.677032  | 2.006695  | 0.907126  |
| O  | 1.406508  | 2.977176  | 1.140344  |
| C  | 1.012833  | -1.638901 | 6.104235  |
| C  | 1.581046  | -2.343552 | 5.042544  |

|   |          |           |           |
|---|----------|-----------|-----------|
| C | 1.907950 | -1.687127 | 3.853739  |
| C | 1.666193 | -0.316889 | 3.716671  |
| C | 1.101820 | 0.390080  | 4.790385  |
| C | 0.775410 | -0.268046 | 5.975349  |
| H | 0.761486 | -2.151414 | 7.028430  |
| H | 1.776811 | -3.408142 | 5.137246  |
| H | 2.348386 | -2.235887 | 3.028742  |
| H | 0.917288 | 1.457203  | 4.692278  |
| H | 0.339545 | 0.291198  | 6.798417  |
| C | 3.228880 | 1.990151  | -2.510763 |
| H | 1.573345 | 1.139904  | -3.634712 |
| H | 1.110156 | 1.786119  | -2.077241 |
| H | 3.112323 | 2.890136  | -3.125722 |
| H | 4.041712 | 1.411833  | -2.966069 |
| H | 2.789110 | 2.924219  | -0.588834 |
| H | 4.437204 | 3.196367  | -1.173770 |

Sum of electronic and zero-point energy: -3953.505337

Sum of electronic and thermal free energies: -3953.617148

Frequency: -643.1748

**Supplementary Table 4. O1R<sup>TS</sup> representative 2**

|   |            |           |           |
|---|------------|-----------|-----------|
| C | -0.803055  | 3.700742  | -2.399427 |
| C | 0.217388   | 2.601812  | -2.087150 |
| N | -1.656909  | 4.166742  | -1.408976 |
| C | -1.621972  | 3.823232  | -0.025048 |
| C | -0.763509  | 4.337356  | 0.885826  |
| C | -2.543029  | 2.735096  | 0.396746  |
| O | -2.417041  | 2.116880  | 1.467428  |
| N | -3.539823  | 2.400918  | -0.481611 |
| C | -4.247638  | 1.179726  | -0.324293 |
| C | -5.587763  | 1.051773  | -0.289802 |
| C | -6.637202  | 2.072486  | -0.331180 |
| C | -3.330902  | -0.013113 | -0.363762 |
| N | -0.049655  | 1.661853  | -1.022317 |
| C | -2.427269  | -1.886485 | 0.951891  |
| N | -3.407256  | -0.877397 | 0.693711  |
| O | -2.508173  | -0.136331 | -1.272888 |
| C | -2.706271  | -3.202302 | 1.084946  |
| O | -0.819339  | 4.201716  | -3.511490 |
| C | 0.317543   | 5.304752  | 0.755776  |
| C | -3.959426  | -3.928903 | 0.921905  |
| C | -5.100467  | -3.414889 | 0.271016  |
| C | -6.247192  | -4.191647 | 0.135842  |
| C | -6.287616  | -5.490868 | 0.652187  |
| C | -5.164132  | -6.018001 | 1.294004  |
| C | -4.010939  | -5.248347 | 1.417560  |
| C | -7.950232  | 1.652322  | -0.620318 |
| C | -9.000874  | 2.564658  | -0.675778 |
| C | -8.762052  | 3.918178  | -0.428401 |
| C | -7.467527  | 4.349033  | -0.122329 |
| C | -6.413463  | 3.440940  | -0.075798 |
| C | 0.602477   | 6.058942  | -0.403235 |
| C | 1.682251   | 6.936595  | -0.426444 |
| C | 2.501447   | 7.085509  | 0.696657  |
| C | 2.230947   | 6.351373  | 1.853896  |
| C | 1.150034   | 5.476577  | 1.882218  |
| H | 1.154033   | 3.110420  | -1.833919 |
| H | 0.366571   | 2.079108  | -3.037140 |
| H | -2.143850  | 5.012760  | -1.691572 |
| H | -0.882142  | 3.918565  | 1.882576  |
| H | -3.590738  | 2.897707  | -1.363666 |
| H | -5.955445  | 0.025909  | -0.270534 |
| H | -0.778964  | 0.970069  | -1.162606 |
| H | -4.045989  | -0.630068 | 1.441202  |
| H | -1.848891  | -3.812322 | 1.357474  |
| H | -5.073384  | -2.418685 | -0.152759 |
| H | -7.114099  | -3.785633 | -0.377749 |
| H | -7.187488  | -6.090189 | 0.548339  |
| H | -5.186313  | -7.028324 | 1.691899  |
| H | -3.133125  | -5.662821 | 1.905708  |
| H | -8.142821  | 0.598801  | -0.809361 |
| H | -10.004488 | 2.219894  | -0.906847 |
| H | -9.579473  | 4.632318  | -0.466619 |
| H | -7.280358  | 5.398574  | 0.086295  |
| H | -5.419342  | 3.784800  | 0.182653  |
| H | -0.012709  | 5.967900  | -1.288425 |
| H | 1.885232   | 7.509097  | -1.326866 |
| H | 3.342608   | 7.772336  | 0.669905  |
| H | 2.859292   | 6.463818  | 2.732690  |
| H | 0.945173   | 4.902787  | 2.782470  |

|    |           |           |           |
|----|-----------|-----------|-----------|
| C  | 5.079995  | -2.404658 | -0.564442 |
| C  | 3.254656  | -3.678970 | -1.872104 |
| P  | 1.747991  | -2.689546 | -1.427062 |
| P  | 4.087044  | -0.946327 | -0.011322 |
| C  | -1.307298 | -6.119874 | -0.696003 |
| C  | -1.465074 | -5.291519 | -1.806618 |
| C  | -0.554516 | -4.261006 | -2.053644 |
| C  | 0.519092  | -4.041575 | -1.179711 |
| C  | 0.667714  | -4.876154 | -0.058712 |
| C  | -0.233439 | -5.912815 | 0.175163  |
| H  | -0.691570 | -3.632540 | -2.926168 |
| H  | 1.471196  | -4.697619 | 0.649200  |
| C  | 0.281331  | -0.269307 | -5.082061 |
| C  | 1.493746  | -0.955781 | -5.179222 |
| C  | 1.953544  | -1.731586 | -4.111892 |
| C  | 1.202869  | -1.814507 | -2.931874 |
| C  | -0.016829 | -1.123372 | -2.840726 |
| C  | -0.481313 | -0.365248 | -3.912806 |
| H  | 2.899683  | -2.253575 | -4.209084 |
| H  | -0.619357 | -1.190532 | -1.941864 |
| C  | 6.228917  | 1.023990  | 3.573912  |
| C  | 6.426739  | -0.336192 | 3.325511  |
| C  | 5.811923  | -0.945274 | 2.230201  |
| C  | 5.002416  | -0.188470 | 1.371942  |
| C  | 4.802121  | 1.180742  | 1.623301  |
| C  | 5.416115  | 1.778617  | 2.723701  |
| H  | 5.968153  | -2.005769 | 2.055187  |
| H  | 4.159499  | 1.768851  | 0.972664  |
| C  | 4.763106  | 1.961356  | -3.548820 |
| C  | 3.466774  | 1.556706  | -3.235403 |
| C  | 3.239409  | 0.701182  | -2.154625 |
| C  | 4.313498  | 0.236059  | -1.390558 |
| C  | 5.619925  | 0.656674  | -1.703247 |
| C  | 5.841559  | 1.514032  | -2.777616 |
| H  | 2.230409  | 0.397506  | -1.913655 |
| H  | 6.460683  | 0.329962  | -1.097103 |
| H  | -0.070503 | 0.333862  | -5.914000 |
| H  | -2.019914 | -6.916983 | -0.506037 |
| H  | 4.936835  | 2.629039  | -4.387893 |
| H  | 6.706844  | 1.493989  | 4.428592  |
| H  | -0.102987 | -6.551365 | 1.044629  |
| H  | -2.297722 | -5.444013 | -2.487072 |
| H  | -1.433589 | 0.148812  | -3.821658 |
| H  | 2.086524  | -0.888456 | -6.086790 |
| H  | 5.258669  | 2.836246  | 2.914715  |
| H  | 7.059841  | -0.924712 | 3.983257  |
| H  | 6.851994  | 1.836800  | -3.011158 |
| H  | 2.627276  | 1.902960  | -3.829236 |
| Rh | 1.912783  | -1.470667 | 0.637880  |
| O  | -0.075512 | -2.269445 | 1.179549  |
| C  | -1.017747 | -1.432905 | 1.080631  |
| N  | -0.774935 | -0.118041 | 1.003072  |
| C  | 0.549419  | 0.405411  | 0.962496  |
| C  | 1.408242  | 0.212892  | 2.141536  |
| H  | -1.532164 | 0.551134  | 1.159728  |
| H  | 2.647378  | -2.784402 | 1.072018  |
| H  | 2.282428  | -1.142148 | 2.217966  |
| H  | 2.260198  | 0.889389  | 2.153596  |
| C  | 0.841778  | 1.502317  | 0.016448  |
| O  | 1.831574  | 2.230984  | 0.147558  |
| C  | -0.479911 | -0.236273 | 5.995835  |
| C  | 0.519585  | -1.134817 | 5.619101  |

|   |           |           |           |
|---|-----------|-----------|-----------|
| C | 1.125734  | -1.024804 | 4.366478  |
| C | 0.748067  | -0.013791 | 3.476832  |
| C | -0.263944 | 0.882290  | 3.860155  |
| C | -0.870391 | 0.771615  | 5.110841  |
| H | -0.955267 | -0.324416 | 6.968697  |
| H | 0.824876  | -1.927999 | 6.295805  |
| H | 1.885907  | -1.742968 | 4.069411  |
| H | -0.587832 | 1.657974  | 3.172530  |
| H | -1.652710 | 1.472109  | 5.389958  |
| C | 4.614805  | -2.967944 | -1.916960 |
| H | 3.283001  | -4.477170 | -1.121687 |
| H | 3.041163  | -4.162897 | -2.831895 |
| H | 4.616275  | -2.167861 | -2.665369 |
| H | 5.359306  | -3.700839 | -2.250474 |
| H | 6.120418  | -2.069725 | -0.639103 |
| H | 5.025953  | -3.171855 | 0.214616  |

Sum of electronic and zero-point energy: -3953.500315  
Sum of electronic and thermal free energies: -3953.611589  
Frequency: -746.0648

**Supplementary Table 5. O1R<sup>TS</sup> representative 3**

|   |           |           |           |
|---|-----------|-----------|-----------|
| C | -2.593980 | 2.091887  | -1.513973 |
| C | -1.355695 | 2.936972  | -1.862589 |
| N | -3.071563 | 2.276642  | -0.257890 |
| C | -4.154363 | 1.645010  | 0.424625  |
| C | -4.951045 | 2.359866  | 1.247286  |
| C | -4.238377 | 0.137787  | 0.518705  |
| O | -4.485905 | -0.397317 | 1.603600  |
| N | -4.006952 | -0.583074 | -0.613796 |
| C | -4.112057 | -2.009452 | -0.702133 |
| C | -4.990308 | -2.622322 | -1.524978 |
| C | -6.072264 | -2.084722 | -2.345377 |
| C | -3.037041 | -2.845553 | -0.059105 |
| N | -0.293998 | 2.120647  | -2.453643 |
| C | -1.016179 | -2.435667 | 1.318032  |
| N | -2.381024 | -2.228090 | 0.995634  |
| O | -2.724680 | -3.952532 | -0.475577 |
| C | -0.465565 | -3.536722 | 1.882749  |
| O | -3.053651 | 1.305719  | -2.343449 |
| C | -4.980807 | 3.806117  | 1.474821  |
| C | -1.073992 | -4.758757 | 2.381852  |
| C | -0.203791 | -5.800716 | 2.765118  |
| C | -0.697194 | -7.003804 | 3.260184  |
| C | -2.076080 | -7.184819 | 3.394241  |
| C | -2.952465 | -6.156591 | 3.031018  |
| C | -2.462850 | -4.957647 | 2.524685  |
| C | -6.618480 | -2.937234 | -3.327592 |
| C | -7.650285 | -2.511678 | -4.159209 |
| C | -8.173817 | -1.224646 | -4.016626 |
| C | -7.658940 | -0.372105 | -3.035487 |
| C | -6.619634 | -0.790848 | -2.209813 |
| C | -5.399789 | 4.260298  | 2.740999  |
| C | -5.386333 | 5.616430  | 3.057794  |
| C | -4.979193 | 6.553646  | 2.104240  |
| C | -4.601503 | 6.122938  | 0.829056  |
| C | -4.600406 | 4.765560  | 0.515205  |
| H | -0.987085 | 3.504826  | -1.006976 |
| H | -1.657795 | 3.665272  | -2.621152 |
| H | -2.585508 | 2.958714  | 0.317596  |
| H | -5.592227 | 1.763900  | 1.891203  |
| H | -3.899198 | -0.058551 | -1.488201 |
| H | -4.834756 | -3.696091 | -1.605536 |
| H | -0.350828 | 2.060187  | -3.465535 |
| H | -2.881348 | -1.476324 | 1.466414  |
| H | 0.618449  | -3.502639 | 1.951423  |
| H | 0.868564  | -5.657634 | 2.660482  |
| H | -0.011027 | -7.796232 | 3.544780  |
| H | -2.467153 | -8.121364 | 3.781725  |
| H | -4.024396 | -6.294118 | 3.139479  |
| H | -3.150165 | -4.169680 | 2.248963  |
| H | -6.218724 | -3.942259 | -3.436495 |
| H | -8.049929 | -3.184357 | -4.912481 |
| H | -8.982930 | -0.890161 | -4.659604 |
| H | -8.073436 | 0.624280  | -2.910471 |
| H | -6.251209 | -0.119398 | -1.444895 |
| H | -5.721641 | 3.534937  | 3.483879  |
| H | -5.702848 | 5.943729  | 4.043931  |
| H | -4.975475 | 7.612483  | 2.346164  |
| H | -4.317650 | 6.849424  | 0.072624  |
| H | -4.334478 | 4.448879  | -0.487319 |



|    |           |           |           |
|----|-----------|-----------|-----------|
| C  | 3.636646  | 1.430277  | -2.590396 |
| C  | 3.456155  | -1.155749 | -2.705169 |
| P  | 3.126068  | -1.549135 | -0.928503 |
| P  | 3.602826  | 1.773039  | -0.769401 |
| C  | 7.112085  | -2.912759 | 1.013812  |
| C  | 5.967697  | -2.698006 | 1.788911  |
| C  | 4.778258  | -2.298395 | 1.182025  |
| C  | 4.713184  | -2.120265 | -0.212123 |
| C  | 5.857716  | -2.362752 | -0.982696 |
| C  | 7.053269  | -2.747783 | -0.370199 |
| H  | 3.896923  | -2.111633 | 1.789559  |
| H  | 5.835112  | -2.251169 | -2.061391 |
| C  | 0.365548  | -5.275874 | -1.039373 |
| C  | 0.018325  | -4.111743 | -1.726837 |
| C  | 0.860274  | -3.001231 | -1.703130 |
| C  | 2.072668  | -3.049572 | -0.992473 |
| C  | 2.427081  | -4.228829 | -0.317403 |
| C  | 1.575137  | -5.334943 | -0.346574 |
| H  | 0.563276  | -2.092321 | -2.213123 |
| H  | 3.362942  | -4.294063 | 0.226082  |
| C  | 8.133260  | 2.111160  | 0.130433  |
| C  | 7.501393  | 3.032972  | -0.711127 |
| C  | 6.132459  | 2.935834  | -0.949347 |
| C  | 5.378816  | 1.913421  | -0.343193 |
| C  | 6.015913  | 1.002148  | 0.506325  |
| C  | 7.389777  | 1.099781  | 0.737983  |
| H  | 5.648864  | 3.664731  | -1.594660 |
| H  | 5.446330  | 0.215791  | 0.983188  |
| C  | 1.852155  | 6.023668  | -0.183947 |
| C  | 2.564049  | 5.388922  | 0.840364  |
| C  | 3.121454  | 4.130171  | 0.626998  |
| C  | 2.977917  | 3.491573  | -0.616816 |
| C  | 2.269505  | 4.134286  | -1.641689 |
| C  | 1.708655  | 5.396555  | -1.422499 |
| H  | 3.663893  | 3.636176  | 1.428422  |
| H  | 2.129151  | 3.655245  | -2.603221 |
| H  | -0.313245 | -6.122673 | -1.031352 |
| H  | 8.042286  | -3.213116 | 1.487577  |
| H  | 1.418586  | 7.005609  | -0.017009 |
| H  | 9.201337  | 2.187809  | 0.313026  |
| H  | 7.936612  | -2.919571 | -0.978390 |
| H  | 6.003724  | -2.834035 | 2.866032  |
| H  | 1.856334  | -6.241048 | 0.182661  |
| H  | -0.931321 | -4.057483 | -2.246709 |
| H  | 7.870461  | 0.378957  | 1.392454  |
| H  | 8.074921  | 3.828484  | -1.177988 |
| H  | 1.165610  | 5.888856  | -2.224459 |
| H  | 2.682918  | 5.874567  | 1.804435  |
| Rh | 2.258303  | 0.298521  | 0.333885  |
| O  | 1.036427  | -1.182501 | 1.357029  |
| C  | -0.121426 | -1.341928 | 0.881916  |
| N  | -0.609986 | -0.475002 | -0.037207 |
| C  | 0.103860  | 0.680500  | -0.473910 |
| C  | 0.367384  | 1.750744  | 0.439187  |
| H  | -1.523992 | -0.667402 | -0.432113 |
| H  | 3.448707  | 0.140095  | 1.340546  |
| H  | 1.768238  | 1.509984  | 1.331993  |
| H  | 0.755520  | 2.628201  | -0.064863 |
| C  | 0.079728  | 0.875171  | -1.959981 |
| O  | 0.372959  | -0.014959 | -2.756515 |
| C  | -2.235308 | 3.047424  | 3.598875  |
| C  | -1.631159 | 3.957454  | 2.728432  |

|   |           |           |           |
|---|-----------|-----------|-----------|
| C | -0.729697 | 3.503726  | 1.764999  |
| C | -0.441697 | 2.129135  | 1.631185  |
| C | -1.013336 | 1.234877  | 2.548916  |
| C | -1.907914 | 1.693085  | 3.516621  |
| H | -2.948663 | 3.396023  | 4.338395  |
| H | -1.870946 | 5.014743  | 2.791647  |
| H | -0.243939 | 4.219133  | 1.104567  |
| H | -0.740992 | 0.189811  | 2.541723  |
| H | -2.356551 | 0.981755  | 4.203264  |
| C | 4.313272  | 0.097319  | -2.963612 |
| H | 3.908683  | -2.036122 | -3.174361 |
| H | 2.466579  | -1.023058 | -3.152953 |
| H | 4.525650  | 0.129880  | -4.038752 |
| H | 5.286146  | 0.022686  | -2.463925 |
| H | 2.604571  | 1.436991  | -2.954884 |
| H | 4.171441  | 2.261589  | -3.063371 |

Sum of electronic and zero-point energy: -3953.491184  
Sum of electronic and thermal free energies: -3953.599166  
Frequency: -673.3802

**Supplementary Table 6. O1R<sup>TS</sup> representative 4**

|   |            |           |           |
|---|------------|-----------|-----------|
| C | -1.228150  | -1.496995 | -3.487653 |
| C | -0.606387  | -0.112826 | -3.677418 |
| N | -2.601316  | -1.668730 | -3.334817 |
| C | -3.647360  | -0.915314 | -2.774434 |
| C | -4.678879  | -1.506859 | -2.118361 |
| C | -3.746389  | 0.541463  | -3.096312 |
| O | -3.402329  | 1.005318  | -4.174735 |
| N | -4.369738  | 1.366403  | -2.159267 |
| C | -4.359614  | 1.318469  | -0.738075 |
| C | -5.453907  | 1.527165  | 0.031168  |
| C | -6.863327  | 1.666749  | -0.323725 |
| C | -3.022076  | 1.041587  | -0.127467 |
| N | -0.172156  | 0.433513  | -2.400574 |
| C | -1.499020  | 1.495162  | 1.776737  |
| N | -2.641596  | 1.779056  | 0.967598  |
| O | -2.266138  | 0.213936  | -0.634538 |
| C | -1.599029  | 1.330543  | 3.113783  |
| O | -0.523287  | -2.500131 | -3.519375 |
| C | -4.886676  | -2.911128 | -1.754734 |
| C | -2.829179  | 1.269507  | 3.906671  |
| C | -4.004627  | 0.651568  | 3.431517  |
| C | -5.153352  | 0.613683  | 4.218300  |
| C | -5.153587  | 1.194249  | 5.490942  |
| C | -3.988965  | 1.788923  | 5.982951  |
| C | -2.833453  | 1.814760  | 5.203537  |
| C | -7.384572  | 1.504518  | -1.625842 |
| C | -8.753728  | 1.609966  | -1.855501 |
| C | -9.631250  | 1.890214  | -0.803817 |
| C | -9.131742  | 2.055295  | 0.490607  |
| C | -7.765423  | 1.939531  | 0.726815  |
| C | -3.855607  | -3.855076 | -1.548751 |
| C | -4.151386  | -5.167233 | -1.181598 |
| C | -5.475555  | -5.575444 | -1.012203 |
| C | -6.508478  | -4.651697 | -1.195864 |
| C | -6.216398  | -3.339316 | -1.554351 |
| H | -1.295343  | 0.565433  | -4.183426 |
| H | 0.279659   | -0.258553 | -4.296839 |
| H | -2.804360  | -2.662706 | -3.363967 |
| H | -5.513344  | -0.856491 | -1.875560 |
| H | -4.570676  | 2.279041  | -2.559100 |
| H | -5.275862  | 1.561671  | 1.104351  |
| H | -0.823747  | 0.372387  | -1.625211 |
| H | -3.323832  | 2.410070  | 1.370410  |
| H | -0.657825  | 1.274975  | 3.653198  |
| H | -3.992168  | 0.150189  | 2.470618  |
| H | -6.044640  | 0.116514  | 3.845047  |
| H | -6.050925  | 1.167152  | 6.102111  |
| H | -3.978646  | 2.225849  | 6.977060  |
| H | -1.927179  | 2.271637  | 5.592740  |
| H | -6.721315  | 1.284423  | -2.452620 |
| H | -9.138039  | 1.477468  | -2.862672 |
| H | -10.697123 | 1.978806  | -0.992409 |
| H | -9.806788  | 2.270895  | 1.313558  |
| H | -7.382343  | 2.059949  | 1.737930  |
| H | -2.813120  | -3.564599 | -1.624638 |
| H | -3.339252  | -5.870420 | -1.020665 |
| H | -5.700783  | -6.599946 | -0.730999 |
| H | -7.542377  | -4.955064 | -1.057810 |
| H | -7.025633  | -2.626453 | -1.693443 |
| C | 3.815402   | -1.189756 | -2.206173 |

|    |           |           |           |
|----|-----------|-----------|-----------|
| C  | 1.729722  | -2.389424 | -1.209635 |
| P  | 1.816417  | -1.715225 | 0.505315  |
| P  | 4.375007  | -0.127682 | -0.798165 |
| C  | 4.362516  | -4.831811 | 2.833694  |
| C  | 4.448898  | -3.478179 | 3.157436  |
| C  | 3.693729  | -2.539099 | 2.452768  |
| C  | 2.843412  | -2.941536 | 1.415779  |
| C  | 2.747908  | -4.310478 | 1.109551  |
| C  | 3.506681  | -5.246762 | 1.809695  |
| H  | 3.777824  | -1.486767 | 2.698747  |
| H  | 2.080223  | -4.655221 | 0.326033  |
| C  | -2.308520 | -2.251060 | 2.541512  |
| C  | -1.154398 | -2.016326 | 3.297939  |
| C  | 0.073679  | -1.864540 | 2.662860  |
| C  | 0.165906  | -1.950643 | 1.261597  |
| C  | -0.992654 | -2.172506 | 0.509780  |
| C  | -2.226720 | -2.322002 | 1.153132  |
| H  | 0.967414  | -1.687712 | 3.253655  |
| H  | -0.948776 | -2.223260 | -0.573322 |
| C  | 7.793052  | -2.393671 | 1.382315  |
| C  | 7.178482  | -1.294222 | 1.985855  |
| C  | 6.134833  | -0.634326 | 1.340306  |
| C  | 5.703838  | -1.049345 | 0.070290  |
| C  | 6.340397  | -2.142664 | -0.537029 |
| C  | 7.370417  | -2.816306 | 0.121860  |
| H  | 5.636821  | 0.193081  | 1.835697  |
| H  | 6.044190  | -2.482181 | -1.523234 |
| C  | 6.445403  | 3.571956  | -2.681014 |
| C  | 6.672039  | 3.228791  | -1.344693 |
| C  | 6.068863  | 2.096841  | -0.802130 |
| C  | 5.232153  | 1.289556  | -1.591209 |
| C  | 5.004518  | 1.639548  | -2.931000 |
| C  | 5.613909  | 2.776431  | -3.468977 |
| H  | 6.253619  | 1.844183  | 0.236672  |
| H  | 4.329775  | 1.065092  | -3.551444 |
| H  | -3.266722 | -2.372718 | 3.038435  |
| H  | 4.956275  | -5.562095 | 3.376061  |
| H  | 6.914802  | 4.455939  | -3.103092 |
| H  | 8.596560  | -2.917675 | 1.891731  |
| H  | 3.428264  | -6.300335 | 1.556897  |
| H  | 5.113312  | -3.146100 | 3.949671  |
| H  | -3.119511 | -2.490824 | 0.561491  |
| H  | -1.214775 | -1.954970 | 4.380865  |
| H  | 7.843193  | -3.669653 | -0.355485 |
| H  | 7.502288  | -0.957016 | 2.966465  |
| H  | 5.428767  | 3.038229  | -4.506699 |
| H  | 7.318993  | 3.842525  | -0.724666 |
| Rh | 2.611032  | 0.542332  | 0.497073  |
| O  | 0.838102  | 1.029247  | 1.766740  |
| C  | -0.157042 | 1.468852  | 1.139475  |
| N  | -0.032564 | 1.913776  | -0.123826 |
| C  | 1.168248  | 1.740454  | -0.893369 |
| C  | 2.267007  | 2.609926  | -0.661922 |
| H  | -0.840351 | 2.325037  | -0.573199 |
| H  | 3.533765  | 0.212735  | 1.717421  |
| H  | 3.303265  | 2.026279  | 0.576056  |
| H  | 2.998467  | 2.574458  | -1.463916 |
| C  | 1.010326  | 1.085211  | -2.228020 |
| O  | 1.885696  | 1.149815  | -3.098857 |
| C  | 1.897291  | 6.547244  | 1.012053  |
| C  | 1.608059  | 5.442710  | 1.817566  |
| C  | 1.737580  | 4.148914  | 1.313477  |

|   |          |           |           |
|---|----------|-----------|-----------|
| C | 2.155839 | 3.946397  | -0.008858 |
| C | 2.472646 | 5.058379  | -0.804844 |
| C | 2.334308 | 6.351297  | -0.299602 |
| H | 1.798823 | 7.553417  | 1.409387  |
| H | 1.293500 | 5.588383  | 2.847463  |
| H | 1.560148 | 3.292814  | 1.954597  |
| H | 2.824318 | 4.907271  | -1.822465 |
| H | 2.578655 | 7.203280  | -0.927619 |
| C | 3.116308 | -2.520829 | -1.868683 |
| H | 1.224315 | -3.360045 | -1.208295 |
| H | 1.099760 | -1.719192 | -1.798548 |
| H | 2.966706 | -3.044308 | -2.820020 |
| H | 3.763497 | -3.159934 | -1.258410 |
| H | 3.130670 | -0.557407 | -2.778889 |
| H | 4.689497 | -1.373403 | -2.841137 |

Sum of electronic and zero-point energy: -3953.485542  
Sum of electronic and thermal free energies: -3953.596915  
Frequency: -616.6241

**Supplementary Table 7. O2R<sup>TS</sup> representative 1**

|    |           |           |           |
|----|-----------|-----------|-----------|
| C  | 4.008790  | -1.145722 | 2.279532  |
| C  | 2.752575  | 1.139745  | 2.372174  |
| P  | 2.703394  | 1.509706  | 0.556421  |
| P  | 4.105894  | -1.434366 | 0.454150  |
| C  | 6.607020  | 3.865652  | -0.310458 |
| C  | 6.034922  | 3.063175  | -1.297945 |
| C  | 4.873111  | 2.339269  | -1.027307 |
| C  | 4.270456  | 2.407420  | 0.235189  |
| C  | 4.840774  | 3.236497  | 1.216809  |
| C  | 6.005307  | 3.954128  | 0.947426  |
| H  | 4.437258  | 1.710457  | -1.795653 |
| H  | 4.378791  | 3.332783  | 2.194378  |
| C  | -0.638453 | 4.593970  | -0.295489 |
| C  | -0.934113 | 3.394498  | 0.356963  |
| C  | 0.087438  | 2.498271  | 0.665041  |
| C  | 1.412463  | 2.782070  | 0.303947  |
| C  | 1.704383  | 3.987343  | -0.353312 |
| C  | 0.680359  | 4.892109  | -0.641874 |
| H  | -0.155837 | 1.562356  | 1.154657  |
| H  | 2.722162  | 4.221079  | -0.645416 |
| C  | 8.284249  | 0.011045  | -0.969046 |
| C  | 8.027402  | -0.133417 | 0.394508  |
| C  | 6.773371  | -0.563594 | 0.832444  |
| C  | 5.751267  | -0.829383 | -0.091080 |
| C  | 6.018709  | -0.674874 | -1.461086 |
| C  | 7.279081  | -0.271000 | -1.896852 |
| H  | 6.607988  | -0.687922 | 1.896867  |
| H  | 5.231750  | -0.855495 | -2.186770 |
| C  | 4.312030  | -6.047878 | -0.044630 |
| C  | 4.973310  | -5.208817 | -0.944319 |
| C  | 4.927082  | -3.825467 | -0.778319 |
| C  | 4.215410  | -3.261974 | 0.293568  |
| C  | 3.548395  | -4.110266 | 1.194397  |
| C  | 3.602808  | -5.494977 | 1.022165  |
| H  | 5.459915  | -3.192432 | -1.478944 |
| H  | 2.958568  | -3.704554 | 2.006154  |
| H  | -1.439310 | 5.283339  | -0.546804 |
| H  | 7.515712  | 4.422998  | -0.519142 |
| H  | 4.349689  | -7.125454 | -0.175475 |
| H  | 9.262198  | 0.341149  | -1.307245 |
| H  | 6.439752  | 4.584705  | 1.717836  |
| H  | 6.496605  | 2.989184  | -2.277918 |
| H  | 0.917456  | 5.825152  | -1.145899 |
| H  | -1.960233 | 3.135307  | 0.582883  |
| H  | 7.470939  | -0.163547 | -2.960693 |
| H  | 8.803769  | 0.082921  | 1.122568  |
| H  | 3.082937  | -6.139168 | 1.725462  |
| H  | 5.531378  | -5.629864 | -1.775594 |
| Rh | 2.322991  | -0.486344 | -0.637115 |
| O  | 0.662069  | 0.528468  | -1.690524 |
| C  | -0.493998 | 0.214797  | -1.308000 |
| N  | -0.699457 | -0.622972 | -0.274036 |
| C  | 0.352281  | -1.375665 | 0.320685  |
| C  | 0.984855  | -2.380613 | -0.535810 |
| H  | -1.632289 | -0.992962 | -0.153025 |
| H  | 3.335134  | -0.004096 | -1.714783 |
| H  | 2.167287  | -1.887727 | -1.518730 |
| H  | 1.534251  | -3.144460 | 0.004939  |
| C  | -1.866146 | -3.562031 | -3.542744 |
| C  | -1.894604 | -4.111456 | -2.256334 |

|   |           |           |           |
|---|-----------|-----------|-----------|
| C | -0.904037 | -3.777329 | -1.332657 |
| C | 0.112079  | -2.869744 | -1.672578 |
| C | 0.148818  | -2.345469 | -2.968754 |
| C | -0.833710 | -2.692691 | -3.900738 |
| H | -2.638688 | -3.819869 | -4.262167 |
| H | -2.702606 | -4.772925 | -1.959584 |
| H | -0.955885 | -4.171989 | -0.324815 |
| H | 0.924092  | -1.634712 | -3.237790 |
| H | -0.794133 | -2.271758 | -4.901672 |
| C | 3.986598  | 0.309961  | 2.782616  |
| H | 2.722445  | 2.080005  | 2.933193  |
| H | 1.829173  | 0.597655  | 2.599463  |
| H | 3.999880  | 0.261073  | 3.878497  |
| H | 4.899137  | 0.838820  | 2.489630  |
| H | 3.081502  | -1.637436 | 2.582359  |
| H | 4.836508  | -1.694559 | 2.742062  |
| C | -4.910219 | -2.862273 | -0.270080 |
| C | -4.878153 | -2.853019 | 1.266028  |
| N | -4.907809 | -1.664205 | -0.970924 |
| C | -5.026176 | -0.331886 | -0.480924 |
| C | -6.066029 | 0.144676  | 0.238680  |
| C | -3.873474 | 0.599890  | -0.741075 |
| O | -3.795926 | 1.713148  | -0.232108 |
| N | -2.922515 | 0.110692  | -1.617040 |
| C | -1.710620 | 0.792100  | -1.919885 |
| C | -1.602858 | 1.971003  | -2.572500 |
| C | -2.608528 | 2.826951  | -3.184159 |
| N | -4.110938 | -1.800506 | 1.909207  |
| C | -2.762309 | -1.763212 | 1.753618  |
| C | -1.974771 | -0.633757 | 2.354672  |
| N | -0.594339 | -0.922500 | 2.596114  |
| C | 0.328564  | -1.594771 | 1.776805  |
| O | 1.168793  | -2.301377 | 2.342786  |
| C | -2.554121 | 0.549062  | 2.665452  |
| O | -2.192951 | -2.634992 | 1.086148  |
| O | -4.990250 | -3.920290 | -0.868297 |
| C | -7.308345 | -0.497463 | 0.662366  |
| C | -2.008058 | 1.769227  | 3.249801  |
| C | -3.927038 | 2.427484  | -3.482645 |
| C | -4.818476 | 3.317096  | -4.072492 |
| C | -4.422139 | 4.625704  | -4.368619 |
| C | -3.117678 | 5.036429  | -4.085137 |
| C | -2.219255 | 4.142953  | -3.508408 |
| C | -7.886482 | -1.615248 | 0.023169  |
| C | -9.071214 | -2.167795 | 0.501237  |
| C | -9.703717 | -1.626004 | 1.625464  |
| C | -9.152594 | -0.511617 | 2.261490  |
| C | -7.974276 | 0.051955  | 1.777328  |
| C | -2.796291 | 2.934389  | 3.147869  |
| C | -2.341686 | 4.155470  | 3.636122  |
| C | -1.091502 | 4.237219  | 4.253571  |
| C | -0.306588 | 3.087951  | 4.382995  |
| C | -0.756470 | 1.866124  | 3.891657  |
| H | -4.480620 | -3.832496 | 1.540758  |
| H | -5.911608 | -2.783238 | 1.616096  |
| H | -5.016705 | -1.823629 | -1.969004 |
| H | -5.919173 | 1.162680  | 0.594635  |
| H | -2.992549 | -0.862720 | -1.896016 |
| H | -0.588900 | 2.361831  | -2.596697 |
| H | -4.587308 | -1.138362 | 2.501168  |
| H | -0.404556 | -1.205799 | 3.554713  |
| H | -3.600909 | 0.644051  | 2.388208  |

|   |            |           |           |
|---|------------|-----------|-----------|
| H | -4.244365  | 1.413917  | -3.271932 |
| H | -5.828704  | 2.991319  | -4.303492 |
| H | -5.125302  | 5.317558  | -4.823412 |
| H | -2.799831  | 6.048015  | -4.320630 |
| H | -1.203172  | 4.460518  | -3.289851 |
| H | -7.418832  | -2.041720 | -0.856204 |
| H | -9.505351  | -3.023628 | -0.007180 |
| H | -10.625353 | -2.065262 | 1.995741  |
| H | -9.644535  | -0.076941 | 3.126660  |
| H | -7.556232  | 0.929073  | 2.265887  |
| H | -3.757809  | 2.878480  | 2.643597  |
| H | -2.959494  | 5.042526  | 3.532876  |
| H | -0.733454  | 5.188277  | 4.636797  |
| H | 0.660417   | 3.143542  | 4.875272  |
| H | -0.134013  | 0.988749  | 4.000319  |

Sum of electronic and zero-point energy: -3953.496025  
Sum of electronic and thermal free energies: -3953.604179  
Frequency: -795.1597



**Supplementary Table 8. O2R<sup>TS</sup> representative 2**

|    |           |           |           |
|----|-----------|-----------|-----------|
| C  | 4.278507  | -2.961796 | -1.329401 |
| C  | 2.066494  | -4.074049 | -2.096210 |
| P  | 0.795895  | -3.028806 | -1.216345 |
| P  | 3.737956  | -1.358261 | -0.571659 |
| C  | -1.526668 | -6.519838 | 0.774012  |
| C  | -0.574836 | -5.802953 | 1.504048  |
| C  | 0.087870  | -4.721175 | 0.921893  |
| C  | -0.194439 | -4.348561 | -0.402115 |
| C  | -1.158874 | -5.067810 | -1.126673 |
| C  | -1.822824 | -6.145205 | -0.538631 |
| H  | 0.810618  | -4.157623 | 1.500800  |
| H  | -1.399274 | -4.783670 | -2.146225 |
| C  | -1.956064 | -1.040025 | -4.352398 |
| C  | -2.437614 | -1.333945 | -3.074295 |
| C  | -1.616615 | -1.979531 | -2.153491 |
| C  | -0.302841 | -2.340327 | -2.499748 |
| C  | 0.167912  | -2.052108 | -3.789566 |
| C  | -0.658067 | -1.405989 | -4.710272 |
| H  | -2.018247 | -2.215167 | -1.173435 |
| H  | 1.175909  | -2.325576 | -4.086530 |
| C  | 6.824526  | -0.243137 | 2.695019  |
| C  | 6.622575  | -1.583831 | 2.362040  |
| C  | 5.726384  | -1.929727 | 1.348975  |
| C  | 5.026293  | -0.932997 | 0.654829  |
| C  | 5.233841  | 0.413581  | 0.994583  |
| C  | 6.130163  | 0.754952  | 2.007129  |
| H  | 5.575529  | -2.979137 | 1.117009  |
| H  | 4.713982  | 1.202309  | 0.461564  |
| C  | 4.252740  | 1.429288  | -4.236973 |
| C  | 5.357006  | 1.155963  | -3.422450 |
| C  | 5.217249  | 0.350925  | -2.291539 |
| C  | 3.963489  | -0.194419 | -1.968866 |
| C  | 2.868348  | 0.061122  | -2.804863 |
| C  | 3.008470  | 0.876219  | -3.928967 |
| H  | 6.078192  | 0.158240  | -1.658888 |
| H  | 1.898037  | -0.363000 | -2.582247 |
| H  | -2.593239 | -0.531116 | -5.070083 |
| H  | -2.039274 | -7.363474 | 1.228130  |
| H  | 4.368003  | 2.063801  | -5.111158 |
| H  | 7.521205  | 0.022014  | 3.484988  |
| H  | -2.568934 | -6.691815 | -1.107998 |
| H  | -0.350085 | -6.081025 | 2.529844  |
| H  | -0.284535 | -1.191479 | -5.707826 |
| H  | -3.445435 | -1.062434 | -2.776248 |
| H  | 6.283483  | 1.802347  | 2.247464  |
| H  | 7.161351  | -2.364648 | 2.890865  |
| H  | 2.139786  | 1.071424  | -4.551076 |
| H  | 6.330083  | 1.572162  | -3.668657 |
| Rh | 1.663957  | -1.447548 | 0.356228  |
| O  | -0.211986 | -1.735024 | 1.410335  |
| C  | -1.146648 | -0.954409 | 1.086892  |
| N  | -0.883370 | 0.178639  | 0.395369  |
| C  | 0.431444  | 0.606661  | 0.056157  |
| C  | 1.408708  | 0.872480  | 1.059552  |
| H  | -1.659502 | 0.666584  | -0.034160 |
| H  | 2.352867  | -2.657349 | 1.095012  |
| H  | 2.226049  | -0.500486 | 1.564768  |
| H  | 2.300902  | 1.325328  | 0.636830  |
| C  | 0.917906  | 2.428368  | 5.043153  |
| C  | 2.187714  | 2.212720  | 4.497072  |

|   |           |           |           |
|---|-----------|-----------|-----------|
| C | 2.318899  | 1.661057  | 3.225547  |
| C | 1.185254  | 1.306625  | 2.471461  |
| C | -0.083371 | 1.512327  | 3.035877  |
| C | -0.215111 | 2.079029  | 4.306341  |
| H | 0.814923  | 2.861725  | 6.033720  |
| H | 3.076874  | 2.479661  | 5.061260  |
| H | 3.308328  | 1.502989  | 2.804383  |
| H | -0.980337 | 1.272816  | 2.485137  |
| H | -1.212693 | 2.242382  | 4.704045  |
| C | 3.399649  | -3.426869 | -2.506168 |
| H | 1.572325  | -4.513307 | -2.970304 |
| H | 2.267650  | -4.898931 | -1.402784 |
| H | 3.243253  | -2.599405 | -3.206717 |
| H | 3.967907  | -4.183108 | -3.061181 |
| H | 5.310035  | -2.811385 | -1.667711 |
| H | 4.288125  | -3.725124 | -0.544225 |
| C | -3.238924 | 2.965802  | 1.507744  |
| C | -2.408710 | 4.262280  | 1.513881  |
| N | -3.723503 | 2.604351  | 0.289883  |
| C | -4.610902 | 1.537193  | -0.075767 |
| C | -5.684506 | 1.767717  | -0.862620 |
| C | -4.202830 | 0.102155  | 0.150973  |
| O | -4.521431 | -0.798201 | -0.618137 |
| N | -3.409876 | -0.102651 | 1.255350  |
| C | -2.559633 | -1.228007 | 1.404586  |
| C | -2.938944 | -2.496645 | 1.695662  |
| C | -4.252353 | -3.044215 | 1.993659  |
| N | -0.997632 | 4.019221  | 1.239863  |
| C | -0.590956 | 3.727225  | -0.031780 |
| C | 0.873532  | 3.458496  | -0.245966 |
| N | 1.146921  | 2.518528  | -1.294670 |
| C | 0.461532  | 1.293522  | -1.273188 |
| O | -0.090236 | 0.848762  | -2.267682 |
| C | 1.821488  | 4.116521  | 0.451914  |
| O | -1.381542 | 3.675292  | -0.978630 |
| O | -3.390158 | 2.320073  | 2.551075  |
| C | -6.259075 | 3.024351  | -1.339098 |
| C | 3.280914  | 4.036831  | 0.381031  |
| C | -5.405014 | -2.268332 | 2.240389  |
| C | -6.617342 | -2.883114 | 2.531363  |
| C | -6.713516 | -4.278580 | 2.573223  |
| C | -5.581618 | -5.060860 | 2.333585  |
| C | -4.363260 | -4.449118 | 2.054248  |
| C | -6.063886 | 4.275165  | -0.716483 |
| C | -6.653291 | 5.424914  | -1.234752 |
| C | -7.442299 | 5.357613  | -2.386852 |
| C | -7.657027 | 4.125115  | -3.008366 |
| C | -7.081604 | 2.971396  | -2.483004 |
| C | 4.000925  | 3.538801  | -0.724189 |
| C | 5.394902  | 3.547447  | -0.714934 |
| C | 6.098218  | 4.028117  | 0.392678  |
| C | 5.397284  | 4.510018  | 1.501965  |
| C | 4.005324  | 4.522925  | 1.489624  |
| H | -2.497704 | 4.690368  | 2.513344  |
| H | -2.784446 | 4.979855  | 0.779292  |
| H | -3.397916 | 3.181396  | -0.484437 |
| H | -6.160738 | 0.862435  | -1.232627 |
| H | -3.349254 | 0.661409  | 1.937335  |
| H | -2.127405 | -3.220849 | 1.684424  |
| H | -0.417464 | 3.718476  | 2.014042  |
| H | 1.087937  | 2.919066  | -2.228923 |
| H | 1.451948  | 4.814090  | 1.200680  |

|   |           |           |           |
|---|-----------|-----------|-----------|
| H | -5.342999 | -1.188500 | 2.219933  |
| H | -7.494935 | -2.273184 | 2.725267  |
| H | -7.666089 | -4.751454 | 2.794997  |
| H | -5.648543 | -6.144475 | 2.368834  |
| H | -3.481853 | -5.055515 | 1.868705  |
| H | -5.481879 | 4.339601  | 0.195018  |
| H | -6.502801 | 6.377566  | -0.734773 |
| H | -7.895924 | 6.258423  | -2.789979 |
| H | -8.279316 | 4.062291  | -3.896262 |
| H | -7.258775 | 2.012737  | -2.963925 |
| H | 3.475065  | 3.154436  | -1.588922 |
| H | 5.931324  | 3.171897  | -1.579535 |
| H | 7.184445  | 4.033184  | 0.388681  |
| H | 5.934159  | 4.890151  | 2.366412  |
| H | 3.463139  | 4.909847  | 2.348702  |

Sum of electronic and zero-point energy: -3953.49836  
Sum of electronic and thermal free energies: -3953.605536  
Frequency: -661.2544

**Supplementary Table 9. O2R<sup>TS</sup> representative 3**

|    |           |           |           |
|----|-----------|-----------|-----------|
| C  | -3.960643 | -2.193496 | -2.828120 |
| C  | -1.468829 | -2.360277 | -3.648932 |
| P  | -0.538376 | -1.573354 | -2.247240 |
| P  | -3.712745 | -1.451835 | -1.143258 |
| C  | 3.028679  | 0.661803  | -4.213940 |
| C  | 1.709241  | 1.043608  | -4.478814 |
| C  | 0.646653  | 0.347217  | -3.907788 |
| C  | 0.888295  | -0.757497 | -3.073127 |
| C  | 2.212149  | -1.155318 | -2.837011 |
| C  | 3.277846  | -0.446226 | -3.401210 |
| H  | -0.370826 | 0.686962  | -4.073550 |
| H  | 2.418881  | -2.022120 | -2.218892 |
| C  | 1.361345  | -4.944348 | 0.299875  |
| C  | 1.333795  | -3.623162 | 0.760459  |
| C  | 0.769798  | -2.626124 | -0.035564 |
| C  | 0.225786  | -2.935479 | -1.294535 |
| C  | 0.267337  | -4.260675 | -1.749119 |
| C  | 0.831817  | -5.260133 | -0.952274 |
| H  | 0.721614  | -1.607739 | 0.340456  |
| H  | -0.141767 | -4.530024 | -2.716973 |
| C  | -7.389612 | 1.030479  | 0.140544  |
| C  | -6.622218 | 0.350861  | 1.090454  |
| C  | -5.549540 | -0.446202 | 0.687743  |
| C  | -5.238469 | -0.563184 | -0.677887 |
| C  | -6.006370 | 0.124644  | -1.627683 |
| C  | -7.082314 | 0.912899  | -1.217770 |
| H  | -4.944227 | -0.962612 | 1.426476  |
| H  | -5.765951 | 0.060500  | -2.684787 |
| C  | -3.788496 | -5.412311 | 1.252698  |
| C  | -4.954422 | -4.908076 | 0.668110  |
| C  | -4.925811 | -3.692484 | -0.013415 |
| C  | -3.726368 | -2.964458 | -0.109808 |
| C  | -2.569542 | -3.469632 | 0.489014  |
| C  | -2.597517 | -4.691683 | 1.161805  |
| H  | -5.839457 | -3.305940 | -0.456903 |
| H  | -1.651746 | -2.906876 | 0.445640  |
| H  | 1.794813  | -5.723633 | 0.920246  |
| H  | 3.852444  | 1.227942  | -4.638451 |
| H  | -3.813604 | -6.361160 | 1.781035  |
| H  | -8.225971 | 1.647431  | 0.456516  |
| H  | 4.297717  | -0.770439 | -3.209640 |
| H  | 1.512856  | 1.904517  | -5.110523 |
| H  | 0.850085  | -6.285198 | -1.311328 |
| H  | 1.737728  | -3.363121 | 1.733342  |
| H  | -7.678717 | 1.436894  | -1.959043 |
| H  | -6.859195 | 0.437630  | 2.147129  |
| H  | -1.686172 | -5.069787 | 1.615626  |
| H  | -5.886520 | -5.460585 | 0.743864  |
| Rh | -1.979671 | 0.034582  | -1.223048 |
| O  | -0.494121 | 1.566026  | -1.527215 |
| C  | 0.347973  | 1.676158  | -0.599854 |
| N  | 0.071186  | 1.257135  | 0.648459  |
| C  | -1.231505 | 0.724204  | 0.960752  |
| C  | -2.423086 | 1.469980  | 0.730221  |
| H  | 0.739731  | 1.479024  | 1.386921  |
| H  | -2.550431 | 0.254003  | -2.670488 |
| H  | -3.027132 | 1.203885  | -0.791687 |
| H  | -3.277226 | 0.976663  | 1.184993  |
| C  | -3.235237 | 5.680353  | 0.459564  |
| C  | -4.263191 | 4.732498  | 0.486934  |

|   |           |           |           |
|---|-----------|-----------|-----------|
| C | -3.956747 | 3.377786  | 0.550580  |
| C | -2.619493 | 2.936678  | 0.589848  |
| C | -1.597454 | 3.897027  | 0.567976  |
| C | -1.907115 | 5.256207  | 0.504416  |
| H | -3.469614 | 6.739805  | 0.409071  |
| H | -5.301553 | 5.050334  | 0.460916  |
| H | -4.758394 | 2.642794  | 0.570301  |
| H | -0.559820 | 3.606988  | 0.649716  |
| H | -1.101861 | 5.985502  | 0.500060  |
| C | -2.779229 | -3.085536 | -3.272906 |
| H | -1.679385 | -1.536326 | -4.340306 |
| H | -0.798462 | -3.047836 | -4.176021 |
| H | -2.585175 | -3.844804 | -2.505916 |
| H | -3.108634 | -3.633561 | -4.163681 |
| H | -4.117327 | -1.382436 | -3.545983 |
| H | -4.872125 | -2.800562 | -2.791171 |
| C | 5.506204  | 0.070137  | 3.219895  |
| C | 4.380368  | -0.808554 | 3.757873  |
| N | 5.274659  | 0.711196  | 2.008875  |
| C | 4.326589  | 0.361794  | 1.018121  |
| C | 4.284540  | -0.833598 | 0.377986  |
| C | 3.231623  | 1.361358  | 0.794832  |
| O | 2.710543  | 2.003450  | 1.718071  |
| N | 2.821720  | 1.496783  | -0.496699 |
| C | 1.688437  | 2.237054  | -0.935666 |
| C | 1.764431  | 3.207098  | -1.870099 |
| C | 2.935801  | 3.807766  | -2.503674 |
| N | 3.090680  | -0.140874 | 3.652298  |
| C | 1.948733  | -0.850630 | 3.482053  |
| C | 0.671440  | -0.069331 | 3.307437  |
| N | -0.306831 | -0.841876 | 2.645777  |
| C | -1.387733 | -0.422408 | 1.891144  |
| O | -2.463150 | -1.018750 | 1.989095  |
| C | 0.490880  | 1.167323  | 3.828521  |
| O | 1.912689  | -2.084927 | 3.477851  |
| O | 6.547480  | 0.238190  | 3.825815  |
| C | 5.189870  | -1.981052 | 0.422233  |
| C | -0.723303 | 1.992018  | 3.914245  |
| C | 4.240987  | 3.762865  | -1.972488 |
| C | 5.306804  | 4.328640  | -2.667325 |
| C | 5.098334  | 4.944948  | -3.904985 |
| C | 3.807770  | 5.014751  | -4.435971 |
| C | 2.738172  | 4.462829  | -3.736251 |
| C | 6.507497  | -1.947730 | 0.927652  |
| C | 7.300026  | -3.091608 | 0.901956  |
| C | 6.803449  | -4.290183 | 0.379169  |
| C | 5.505152  | -4.336910 | -0.133175 |
| C | 4.712111  | -3.193329 | -0.118195 |
| C | -2.007502 | 1.456925  | 4.137570  |
| C | -3.114886 | 2.296625  | 4.227458  |
| C | -2.967183 | 3.681721  | 4.105166  |
| C | -1.696565 | 4.225693  | 3.913725  |
| C | -0.584919 | 3.389278  | 3.826936  |
| H | 4.634260  | -1.035172 | 4.796767  |
| H | 4.336839  | -1.756742 | 3.208846  |
| H | 5.979478  | 1.406235  | 1.784802  |
| H | 3.406896  | -0.994667 | -0.244408 |
| H | 3.367394  | 1.057954  | -1.231733 |
| H | 0.804856  | 3.543433  | -2.254651 |
| H | 3.082432  | 0.837878  | 3.379507  |
| H | -0.399509 | -1.790303 | 2.998452  |
| H | 1.377787  | 1.642459  | 4.236386  |

|   |           |           |           |
|---|-----------|-----------|-----------|
| H | 4.414579  | 3.310937  | -1.003552 |
| H | 6.304813  | 4.294962  | -2.239788 |
| H | 5.934430  | 5.379920  | -4.444652 |
| H | 3.634986  | 5.506491  | -5.388759 |
| H | 1.733824  | 4.525636  | -4.147837 |
| H | 6.918743  | -1.031973 | 1.332556  |
| H | 8.311816  | -3.047396 | 1.293825  |
| H | 7.427219  | -5.179271 | 0.369082  |
| H | 5.110092  | -5.261246 | -0.544736 |
| H | 3.699749  | -3.240001 | -0.507605 |
| H | -2.137748 | 0.386694  | 4.250949  |
| H | -4.097537 | 1.866755  | 4.400852  |
| H | -3.835172 | 4.331330  | 4.164408  |
| H | -1.571591 | 5.300190  | 3.822031  |
| H | 0.403629  | 3.815412  | 3.672722  |

Sum of electronic and zero-point energy: -3953.493909  
Sum of electronic and thermal free energies: -3953.600527  
Frequency: -634.7129

**Supplementary Table 10. O2R<sup>TS</sup> representative 4**

|    |           |           |           |
|----|-----------|-----------|-----------|
| C  | 4.919964  | 1.849363  | -1.878928 |
| C  | 2.708568  | 2.895947  | -2.860448 |
| P  | 1.413628  | 2.160766  | -1.752546 |
| P  | 4.236072  | 0.868870  | -0.455130 |
| C  | -2.404973 | 1.521469  | -4.318036 |
| C  | -1.162363 | 1.048895  | -4.753674 |
| C  | -0.018002 | 1.271000  | -3.991532 |
| C  | -0.095342 | 1.994646  | -2.789176 |
| C  | -1.344670 | 2.469089  | -2.359448 |
| C  | -2.494385 | 2.233546  | -3.121118 |
| H  | 0.929782  | 0.853464  | -4.318128 |
| H  | -1.442881 | 3.035970  | -1.440159 |
| C  | 0.151148  | 5.369164  | 1.347000  |
| C  | -0.145247 | 4.015582  | 1.533720  |
| C  | 0.270628  | 3.082867  | 0.586067  |
| C  | 0.968707  | 3.479630  | -0.563196 |
| C  | 1.257290  | 4.838060  | -0.745337 |
| C  | 0.855361  | 5.774367  | 0.211385  |
| H  | 0.098199  | 2.024888  | 0.749773  |
| H  | 1.793555  | 5.180784  | -1.624024 |
| C  | 6.860058  | -2.817300 | 0.474027  |
| C  | 6.145734  | -2.173529 | 1.488424  |
| C  | 5.405642  | -1.024949 | 1.205210  |
| C  | 5.375329  | -0.515466 | -0.104536 |
| C  | 6.087042  | -1.167127 | -1.120374 |
| C  | 6.831954  | -2.310711 | -0.828013 |
| H  | 4.841212  | -0.531677 | 1.991769  |
| H  | 6.057645  | -0.797340 | -2.141028 |
| C  | 5.077657  | 3.990297  | 2.859738  |
| C  | 3.757954  | 3.681244  | 2.531495  |
| C  | 3.486050  | 2.703819  | 1.573139  |
| C  | 4.528530  | 2.038522  | 0.925163  |
| C  | 5.858681  | 2.347752  | 1.264132  |
| C  | 6.128573  | 3.316507  | 2.228690  |
| H  | 2.465739  | 2.447717  | 1.344622  |
| H  | 6.682538  | 1.824324  | 0.786407  |
| H  | -0.162564 | 6.103282  | 2.083184  |
| H  | -3.294971 | 1.325710  | -4.908884 |
| H  | 5.291469  | 4.748199  | 3.608045  |
| H  | 7.438312  | -3.709309 | 0.697193  |
| H  | -3.443930 | 2.624309  | -2.764299 |
| H  | -1.091804 | 0.487429  | -5.680533 |
| H  | 1.090381  | 6.824439  | 0.064655  |
| H  | -0.688404 | 3.684794  | 2.414854  |
| H  | 7.388269  | -2.806824 | -1.618024 |
| H  | 6.165296  | -2.563665 | 2.502110  |
| H  | 7.158102  | 3.545377  | 2.488434  |
| H  | 2.933360  | 4.194195  | 3.018059  |
| Rh | 2.203110  | 0.014935  | -1.062274 |
| O  | 0.480052  | -0.898614 | -1.952201 |
| C  | -0.514267 | -1.039135 | -1.195572 |
| N  | -0.388990 | -0.998870 | 0.147295  |
| C  | 0.915092  | -0.910643 | 0.746865  |
| C  | 1.923400  | -1.882675 | 0.491727  |
| H  | -1.187727 | -1.333842 | 0.692491  |
| H  | 2.929281  | -0.030852 | -2.452169 |
| H  | 2.821813  | -1.477286 | -0.856395 |
| H  | 2.775929  | -1.752575 | 1.152410  |
| C  | 1.702888  | -6.004075 | -0.702335 |
| C  | 0.525275  | -5.258466 | -0.642697 |

|   |           |           |           |
|---|-----------|-----------|-----------|
| C | 0.554912  | -3.908911 | -0.287924 |
| C | 1.774420  | -3.283903 | 0.015052  |
| C | 2.955786  | -4.048553 | -0.041409 |
| C | 2.922782  | -5.392648 | -0.395659 |
| H | 1.672185  | -7.053581 | -0.980855 |
| H | -0.429009 | -5.727578 | -0.864949 |
| H | -0.383326 | -3.378024 | -0.209839 |
| H | 3.905797  | -3.575614 | 0.196695  |
| H | 3.845830  | -5.964221 | -0.430902 |
| C | 4.089329  | 3.114541  | -2.200098 |
| H | 2.801738  | 2.204575  | -3.704702 |
| H | 2.337185  | 3.842402  | -3.267905 |
| H | 3.981512  | 3.722221  | -1.293224 |
| H | 4.683989  | 3.717381  | -2.896592 |
| H | 5.940096  | 2.151312  | -1.617094 |
| H | 4.971104  | 1.196096  | -2.755549 |
| C | -4.289744 | 2.233565  | 0.230238  |
| C | -3.653424 | 2.314793  | 1.628216  |
| N | -4.865900 | 1.033431  | -0.135629 |
| C | -4.664639 | -0.216875 | 0.525563  |
| C | -5.360161 | -0.628956 | 1.608446  |
| C | -3.504110 | -1.026877 | 0.058661  |
| O | -3.037308 | -1.991318 | 0.681260  |
| N | -2.953051 | -0.603482 | -1.120302 |
| C | -1.860382 | -1.208904 | -1.793663 |
| C | -1.954572 | -1.712148 | -3.044032 |
| C | -3.122183 | -1.881975 | -3.904336 |
| N | -2.522344 | 1.430027  | 1.839151  |
| C | -2.492418 | 0.469479  | 2.820185  |
| C | -1.196804 | -0.287634 | 2.926590  |
| N | -0.004386 | 0.436391  | 2.605469  |
| C | 1.120274  | -0.077163 | 1.950157  |
| O | 2.243074  | 0.194885  | 2.375999  |
| C | -1.264557 | -1.593644 | 3.263806  |
| O | -3.461029 | 0.207464  | 3.525185  |
| O | -4.326903 | 3.206264  | -0.510471 |
| C | -6.473342 | 0.003339  | 2.306354  |
| C | -0.187903 | -2.579897 | 3.400750  |
| C | -4.460609 | -1.845098 | -3.459939 |
| C | -5.510065 | -1.987343 | -4.363796 |
| C | -5.253888 | -2.162646 | -5.727151 |
| C | -3.933959 | -2.218515 | -6.181865 |
| C | -2.882792 | -2.090864 | -5.278326 |
| C | -6.705449 | -0.391075 | 3.639387  |
| C | -7.734295 | 0.178153  | 4.383585  |
| C | -8.564323 | 1.141273  | 3.804016  |
| C | -8.355798 | 1.533605  | 2.478169  |
| C | -7.319147 | 0.975920  | 1.734975  |
| C | 1.074429  | -2.282195 | 3.948902  |
| C | 2.064974  | -3.259993 | 4.005775  |
| C | 1.814980  | -4.548760 | 3.524110  |
| C | 0.557071  | -4.864153 | 3.006762  |
| C | -0.438863 | -3.891486 | 2.955617  |
| H | -4.401587 | 2.063994  | 2.385936  |
| H | -3.350120 | 3.358929  | 1.748138  |
| H | -5.371167 | 1.073240  | -1.015824 |
| H | -4.992106 | -1.552218 | 2.046766  |
| H | -3.345567 | 0.210478  | -1.578009 |
| H | -1.004238 | -1.984808 | -3.494747 |
| H | -1.688132 | 1.579154  | 1.292011  |
| H | 0.294981  | 1.089962  | 3.326048  |
| H | -2.276925 | -1.976555 | 3.356761  |



|   |           |           |           |
|---|-----------|-----------|-----------|
| H | -4.678096 | -1.734448 | -2.405226 |
| H | -6.534552 | -1.968266 | -4.002943 |
| H | -6.077332 | -2.267276 | -6.427553 |
| H | -3.725363 | -2.369453 | -7.236949 |
| H | -1.856887 | -2.142245 | -5.634322 |
| H | -6.048179 | -1.126848 | 4.093030  |
| H | -7.890978 | -0.129851 | 5.413119  |
| H | -9.372635 | 1.582051  | 4.380537  |
| H | -9.005526 | 2.274824  | 2.021770  |
| H | -7.175270 | 1.282933  | 0.706448  |
| H | 1.280333  | -1.289540 | 4.331943  |
| H | 3.033968  | -3.014771 | 4.431423  |
| H | 2.593773  | -5.304923 | 3.559227  |
| H | 0.357097  | -5.861816 | 2.628676  |
| H | -1.413869 | -4.130388 | 2.538810  |

Sum of electronic and zero-point energy: -3953.49619  
Sum of electronic and thermal free energies: -3953.60424  
Frequency: -628.5372

**Supplementary Table 11. O2R<sup>TS</sup> representative 5**

|    |           |           |           |
|----|-----------|-----------|-----------|
| C  | 4.497012  | 0.218116  | -2.323972 |
| C  | 2.895959  | -1.719616 | -2.946023 |
| P  | 2.142774  | -2.134618 | -1.308022 |
| P  | 4.287496  | 0.345899  | -0.486393 |
| C  | 4.258454  | -5.911351 | 0.348842  |
| C  | 4.480983  | -5.541015 | -0.977998 |
| C  | 3.837772  | -4.421690 | -1.512827 |
| C  | 2.978769  | -3.652709 | -0.716884 |
| C  | 2.754311  | -4.035552 | 0.618570  |
| C  | 3.385542  | -5.161709 | 1.144072  |
| H  | 4.020337  | -4.157401 | -2.549106 |
| H  | 2.095263  | -3.439852 | 1.244625  |
| C  | -2.221021 | -3.385421 | -2.260526 |
| C  | -1.341706 | -4.319829 | -1.713943 |
| C  | -0.016666 | -3.970661 | -1.449325 |
| C  | 0.444755  | -2.676504 | -1.737632 |
| C  | -0.442816 | -1.748840 | -2.308276 |
| C  | -1.766265 | -2.101511 | -2.567727 |
| H  | 0.652363  | -4.704516 | -1.013018 |
| H  | -0.113957 | -0.738696 | -2.533164 |
| C  | 8.205288  | -1.818386 | 0.747218  |
| C  | 6.984362  | -2.484979 | 0.854871  |
| C  | 5.794439  | -1.827054 | 0.537426  |
| C  | 5.816116  | -0.496548 | 0.098262  |
| C  | 7.050219  | 0.167778  | -0.012369 |
| C  | 8.235443  | -0.489369 | 0.315537  |
| H  | 4.853823  | -2.353648 | 0.635556  |
| H  | 7.086680  | 1.201715  | -0.343841 |
| C  | 5.084364  | 4.773063  | 0.645266  |
| C  | 4.880746  | 3.802698  | 1.631013  |
| C  | 4.642441  | 2.478920  | 1.267460  |
| C  | 4.589595  | 2.110647  | -0.088035 |
| C  | 4.779201  | 3.090735  | -1.071463 |
| C  | 5.038887  | 4.413389  | -0.702036 |
| H  | 4.491783  | 1.727868  | 2.038097  |
| H  | 4.727979  | 2.838077  | -2.124120 |
| H  | -3.262305 | -3.643029 | -2.416062 |
| H  | 4.760279  | -6.781478 | 0.762331  |
| H  | 5.280648  | 5.803471  | 0.927883  |
| H  | 9.130165  | -2.328381 | 1.001396  |
| H  | 3.204800  | -5.448098 | 2.176218  |
| H  | 5.154685  | -6.121970 | -1.601242 |
| H  | -2.448004 | -1.357039 | -2.963654 |
| H  | -1.692464 | -5.318331 | -1.469952 |
| H  | 9.182158  | 0.037518  | 0.236953  |
| H  | 6.947916  | -3.517916 | 1.188964  |
| H  | 5.204991  | 5.161298  | -1.472781 |
| H  | 4.913240  | 4.074349  | 2.681998  |
| Rh | 2.285923  | -0.406394 | 0.320124  |
| O  | 0.488912  | -1.242556 | 1.189267  |
| C  | -0.615702 | -0.806705 | 0.759598  |
| N  | -0.682957 | 0.352991  | 0.056952  |
| C  | 0.515117  | 1.079055  | -0.247457 |
| C  | 1.280985  | 1.707959  | 0.785628  |
| H  | -1.482954 | 0.444053  | -0.585771 |
| H  | 3.197156  | -1.293979 | 1.224809  |
| H  | 2.375098  | 0.724633  | 1.505045  |
| H  | 2.006297  | 2.405173  | 0.376049  |
| C  | -0.314596 | 3.250756  | 4.468008  |
| C  | 0.366881  | 4.067882  | 3.564366  |

|   |            |           |           |
|---|------------|-----------|-----------|
| C | 0.898522   | 3.526525  | 2.395055  |
| C | 0.738127   | 2.163256  | 2.100225  |
| C | 0.082102   | 1.340668  | 3.028568  |
| C | -0.443226  | 1.885573  | 4.200195  |
| H | -0.725778  | 3.669421  | 5.382172  |
| H | 0.490334   | 5.128019  | 3.766599  |
| H | 1.430942   | 4.166772  | 1.698774  |
| H | 0.037518   | 0.271606  | 2.869332  |
| H | -0.941779  | 1.235684  | 4.914182  |
| C | 4.346897   | -1.207082 | -2.885322 |
| H | 2.820755   | -2.600281 | -3.593335 |
| H | 2.247548   | -0.950261 | -3.380822 |
| H | 4.736157   | -1.196469 | -3.910468 |
| H | 4.983137   | -1.905725 | -2.328320 |
| H | 3.764223   | 0.884272  | -2.782742 |
| H | 5.504452   | 0.590447  | -2.542644 |
| C | -5.123487  | 2.128401  | 0.127512  |
| C | -5.234263  | 2.123902  | -1.406211 |
| N | -5.197526  | 0.925976  | 0.788488  |
| C | -5.363555  | -0.370923 | 0.216568  |
| C | -6.492975  | -0.787855 | -0.396982 |
| C | -4.190127  | -1.309434 | 0.246728  |
| O | -4.245642  | -2.434449 | -0.227259 |
| N | -3.073216  | -0.828008 | 0.916277  |
| C | -1.864002  | -1.536964 | 1.070392  |
| C | -1.734126  | -2.836112 | 1.449440  |
| C | -2.697754  | -3.814132 | 1.926582  |
| N | -4.004279  | 2.715580  | -1.924309 |
| C | -2.853863  | 2.006559  | -1.780245 |
| C | -1.573426  | 2.764149  | -1.656266 |
| N | -0.441713  | 2.141396  | -2.259994 |
| C | 0.685050   | 1.660867  | -1.610400 |
| O | 1.782223   | 1.756879  | -2.163279 |
| C | -1.539661  | 3.870827  | -0.872230 |
| O | -2.865142  | 0.768414  | -1.685576 |
| O | -4.907736  | 3.176063  | 0.723427  |
| C | -7.769182  | -0.106479 | -0.607183 |
| C | -0.462717  | 4.789338  | -0.515859 |
| C | -3.937326  | -3.486058 | 2.510523  |
| C | -4.781097  | -4.482465 | 2.989003  |
| C | -4.417809  | -5.828589 | 2.880736  |
| C | -3.189135  | -6.172297 | 2.310996  |
| C | -2.333923  | -5.174222 | 1.853769  |
| C | -8.225821  | 0.992749  | 0.151537  |
| C | -9.455663  | 1.582376  | -0.126524 |
| C | -10.255378 | 1.097586  | -1.166575 |
| C | -9.824775  | 0.002641  | -1.918805 |
| C | -8.600526  | -0.597580 | -1.634584 |
| C | 0.812116   | 4.819230  | -1.119791 |
| C | 1.756929   | 5.758101  | -0.715425 |
| C | 1.459828   | 6.683539  | 0.290000  |
| C | 0.197772   | 6.674912  | 0.888174  |
| C | -0.750789  | 5.739015  | 0.486922  |
| H | -6.084201  | 2.745689  | -1.693230 |
| H | -5.357655  | 1.131574  | -1.832143 |
| H | -5.121711  | 1.014778  | 1.798275  |
| H | -6.405094  | -1.774606 | -0.846182 |
| H | -3.041912  | 0.170089  | 1.080158  |
| H | -0.717238  | -3.205987 | 1.371158  |
| H | -3.940877  | 3.724386  | -1.897240 |
| H | -0.249772  | 2.384454  | -3.227593 |
| H | -2.484411  | 4.107862  | -0.383426 |

|   |            |           |           |
|---|------------|-----------|-----------|
| H | -4.223772  | -2.446010 | 2.613372  |
| H | -5.729022  | -4.211154 | 3.444985  |
| H | -5.085610  | -6.603824 | 3.245500  |
| H | -2.896031  | -7.215346 | 2.232968  |
| H | -1.372324  | -5.440417 | 1.421528  |
| H | -7.631794  | 1.370866  | 0.974383  |
| H | -9.795314  | 2.421127  | 0.474362  |
| H | -11.212156 | 1.564816  | -1.381162 |
| H | -10.445057 | -0.388209 | -2.720039 |
| H | -8.272492  | -1.455480 | -2.216112 |
| H | 1.074638   | 4.122808  | -1.905135 |
| H | 2.733605   | 5.762601  | -1.185388 |
| H | 2.206339   | 7.409507  | 0.599342  |
| H | -0.046697  | 7.393511  | 1.664812  |
| H | -1.728219  | 5.728390  | 0.961966  |

Sum of electronic and zero-point energy: -3953.499481  
Sum of electronic and thermal free energies: -3953.607416  
Frequency: -703.0665

**Supplementary Table 12. O3R<sup>TS</sup> representative 1**

|    |           |           |           |
|----|-----------|-----------|-----------|
| C  | -2.297469 | -2.583110 | -1.953973 |
| C  | -1.157600 | -0.480731 | -2.959362 |
| P  | -1.866677 | 0.812378  | -1.840001 |
| P  | -3.285862 | -1.928381 | -0.536517 |
| C  | -5.356319 | 2.328685  | -4.503580 |
| C  | -5.633689 | 1.806017  | -3.241166 |
| C  | -4.591274 | 1.376667  | -2.415884 |
| C  | -3.264231 | 1.454421  | -2.850345 |
| C  | -2.991047 | 1.995936  | -4.119931 |
| C  | -4.030571 | 2.429111  | -4.939512 |
| H  | -4.813334 | 0.977567  | -1.435934 |
| H  | -1.964265 | 2.092204  | -4.462611 |
| C  | 0.993157  | 4.459739  | -1.894866 |
| C  | -0.331107 | 4.582489  | -1.453108 |
| C  | -1.168151 | 3.471991  | -1.447664 |
| C  | -0.694037 | 2.219838  | -1.882727 |
| C  | 0.632183  | 2.097598  | -2.315561 |
| C  | 1.468077  | 3.221352  | -2.325758 |
| H  | -2.193091 | 3.569950  | -1.103307 |
| H  | 1.030867  | 1.148034  | -2.657405 |
| C  | -7.691532 | -1.601278 | -1.979680 |
| C  | -7.287258 | -0.978626 | -0.795794 |
| C  | -5.961253 | -1.067503 | -0.375633 |
| C  | -5.020694 | -1.792129 | -1.126239 |
| C  | -5.439971 | -2.428389 | -2.304351 |
| C  | -6.765606 | -2.325240 | -2.730946 |
| H  | -5.649197 | -0.545745 | 0.523652  |
| H  | -4.744026 | -3.003186 | -2.905203 |
| C  | -3.330602 | -5.254701 | 2.696836  |
| C  | -2.427686 | -5.342660 | 1.637829  |
| C  | -2.419249 | -4.372603 | 0.631982  |
| C  | -3.324936 | -3.302372 | 0.682243  |
| C  | -4.231499 | -3.219515 | 1.752881  |
| C  | -4.235450 | -4.189968 | 2.751330  |
| H  | -1.679372 | -4.442516 | -0.153861 |
| H  | -4.931893 | -2.393107 | 1.813920  |
| H  | 1.641568  | 5.332210  | -1.911964 |
| H  | -6.165812 | 2.662537  | -5.146632 |
| H  | -3.329934 | -6.008689 | 3.478781  |
| H  | -8.722118 | -1.522325 | -2.313434 |
| H  | -3.807991 | 2.846515  | -5.917456 |
| H  | -6.658762 | 1.723551  | -2.891584 |
| H  | 2.493227  | 3.106107  | -2.658413 |
| H  | -0.702384 | 5.543397  | -1.109358 |
| H  | -7.070925 | -2.812502 | -3.652334 |
| H  | -8.001727 | -0.414780 | -0.202811 |
| H  | -4.941577 | -4.113534 | 3.572979  |
| H  | -1.716188 | -6.161958 | 1.591711  |
| Rh | -2.369010 | -0.019520 | 0.351471  |
| O  | -1.492362 | 1.871922  | 1.144110  |
| C  | -0.261653 | 1.788980  | 1.400663  |
| N  | 0.363259  | 0.605503  | 1.450359  |
| C  | -0.308564 | -0.621211 | 1.144449  |
| C  | -1.223816 | -1.173428 | 2.083178  |
| H  | 1.283422  | 0.580427  | 1.906412  |
| H  | -3.815052 | 0.583463  | 0.261019  |
| H  | -2.802831 | -0.582206 | 1.836199  |
| H  | -1.438066 | -2.219163 | 1.886839  |
| C  | -0.981721 | -0.320220 | 6.281200  |

|   |           |           |           |
|---|-----------|-----------|-----------|
| C | -0.651107 | -1.577327 | 5.769836  |
| C | -0.777019 | -1.832712 | 4.404552  |
| C | -1.216485 | -0.823447 | 3.533263  |
| C | -1.564108 | 0.429464  | 4.052717  |
| C | -1.445233 | 0.677533  | 5.420409  |
| H | -0.891580 | -0.123499 | 7.345694  |
| H | -0.303769 | -2.363708 | 6.434324  |
| H | -0.515307 | -2.808700 | 4.005600  |
| H | -1.954846 | 1.192760  | 3.389171  |
| H | -1.723557 | 1.650728  | 5.815223  |
| C | -2.128471 | -1.656732 | -3.173132 |
| H | -0.936545 | -0.009179 | -3.922857 |
| H | -0.203543 | -0.836259 | -2.557520 |
| H | -1.719538 | -2.270865 | -3.983802 |
| H | -3.098132 | -1.286921 | -3.527352 |
| H | -1.314542 | -2.816282 | -1.534464 |
| H | -2.752671 | -3.533255 | -2.254751 |
| C | 2.950184  | 2.192233  | 1.608803  |
| C | 4.340455  | 2.494921  | 1.027142  |
| N | 1.939858  | 2.993047  | 1.178829  |
| C | 0.566063  | 3.014370  | 1.587898  |
| C | -0.065631 | 4.175266  | 1.868155  |
| C | 0.417131  | -1.521410 | 0.218043  |
| N | 4.968598  | 1.329613  | 0.427198  |
| C | 4.421499  | 0.821255  | -0.717288 |
| C | 5.127825  | -0.277246 | -1.453592 |
| N | 4.349514  | -0.882696 | -2.477088 |
| C | 2.990624  | -1.122067 | -2.336940 |
| C | 2.582066  | -1.566768 | -0.965391 |
| N | 1.453183  | -0.904380 | -0.456883 |
| O | 0.146055  | -2.712430 | 0.082918  |
| C | 3.245799  | -2.540351 | -0.307605 |
| O | 2.202403  | -1.021961 | -3.267544 |
| C | 6.447086  | -0.533085 | -1.280569 |
| O | 3.364791  | 1.299113  | -1.148309 |
| O | 2.816349  | 1.286312  | 2.435576  |
| C | 0.453971  | 5.537008  | 1.949925  |
| C | 2.948869  | -2.984517 | 1.066286  |
| C | 7.303754  | -1.542891 | -1.895781 |
| C | 2.731605  | -4.338860 | 1.355287  |
| C | 2.399416  | -4.739968 | 2.649693  |
| C | 2.292523  | -3.794932 | 3.673120  |
| C | 2.535543  | -2.445287 | 3.400401  |
| C | 2.865059  | -2.043860 | 2.107322  |
| C | 1.807653  | 5.863942  | 2.173417  |
| C | 2.217656  | 7.193868  | 2.210598  |
| C | 1.293545  | 8.225311  | 2.017919  |
| C | -0.053809 | 7.919482  | 1.810082  |
| C | -0.469518 | 6.590976  | 1.789554  |
| C | 6.831038  | -2.625834 | -2.669006 |
| C | 7.718471  | -3.565535 | -3.185146 |
| C | 9.092686  | -3.446349 | -2.955915 |
| C | 9.577566  | -2.381740 | -2.192396 |
| C | 8.692404  | -1.446258 | -1.665106 |
| H | 4.968599  | 2.828468  | 1.857885  |
| H | 4.297223  | 3.295700  | 0.282830  |
| H | 2.134286  | 3.592107  | 0.381249  |
| H | -1.143232 | 4.081299  | 1.975736  |
| H | 5.613989  | 0.780254  | 0.975246  |
| H | 4.616645  | -0.656037 | -3.431739 |
| H | 1.502306  | 0.108791  | -0.445622 |
| H | 4.044121  | -3.049250 | -0.843869 |

|   |           |           |           |
|---|-----------|-----------|-----------|
| H | 6.972794  | 0.133605  | -0.600555 |
| H | 2.795157  | -5.073007 | 0.556775  |
| H | 2.222901  | -5.791455 | 2.859035  |
| H | 2.034169  | -4.109076 | 4.680851  |
| H | 2.466607  | -1.704129 | 4.191423  |
| H | 3.073826  | -0.998227 | 1.906589  |
| H | 2.529894  | 5.076336  | 2.350121  |
| H | 3.261720  | 7.428939  | 2.396843  |
| H | 1.620166  | 9.260834  | 2.041949  |
| H | -0.779953 | 8.715443  | 1.673993  |
| H | -1.520417 | 6.356702  | 1.638361  |
| H | 5.769336  | -2.733989 | -2.852289 |
| H | 7.336447  | -4.395782 | -3.772273 |
| H | 9.779882  | -4.179567 | -3.368018 |
| H | 10.642837 | -2.283372 | -2.005471 |
| H | 9.075706  | -0.624035 | -1.065244 |

Sum of electronic and zero-point energy: -3953.508181  
Sum of electronic and thermal free energies: -3953.616242  
Frequency: -678.9292

**Supplementary Table 13. O3R<sup>TS</sup> representative 2**

|    |           |           |           |
|----|-----------|-----------|-----------|
| C  | 1.078007  | -5.158115 | -0.412853 |
| C  | 3.140035  | -3.953886 | 0.666114  |
| P  | 3.062184  | -2.199845 | 0.068565  |
| P  | -0.059593 | -3.671519 | -0.295579 |
| C  | 6.064237  | -1.974399 | -3.476774 |
| C  | 4.931613  | -1.157856 | -3.451352 |
| C  | 4.013706  | -1.257239 | -2.403648 |
| C  | 4.225592  | -2.171685 | -1.357760 |
| C  | 5.366642  | -2.990786 | -1.394342 |
| C  | 6.277593  | -2.893834 | -2.447670 |
| H  | 3.139425  | -0.617818 | -2.394322 |
| H  | 5.562896  | -3.704035 | -0.599981 |
| C  | 4.866790  | 0.821205  | 3.071266  |
| C  | 3.544949  | 0.390614  | 3.194917  |
| C  | 3.037342  | -0.559128 | 2.309802  |
| C  | 3.846500  | -1.093816 | 1.296192  |
| C  | 5.179682  | -0.661771 | 1.181929  |
| C  | 5.682715  | 0.290119  | 2.069123  |
| H  | 1.992593  | -0.834509 | 2.395003  |
| H  | 5.818408  | -1.046763 | 0.394158  |
| C  | -3.449841 | -4.111806 | -3.418748 |
| C  | -2.155384 | -4.534014 | -3.731415 |
| C  | -1.140700 | -4.455961 | -2.776712 |
| C  | -1.415087 | -3.963352 | -1.493066 |
| C  | -2.714911 | -3.529389 | -1.189437 |
| C  | -3.727233 | -3.608275 | -2.146129 |
| H  | -0.134473 | -4.760850 | -3.050986 |
| H  | -2.950490 | -3.136996 | -0.206841 |
| C  | -1.811188 | -4.309248 | 3.953030  |
| C  | -2.291444 | -5.075401 | 2.884678  |
| C  | -1.796318 | -4.875890 | 1.596385  |
| C  | -0.804110 | -3.906552 | 1.366376  |
| C  | -0.304566 | -3.170474 | 2.446467  |
| C  | -0.814134 | -3.358139 | 3.733128  |
| H  | -2.190514 | -5.462916 | 0.772346  |
| H  | 0.472565  | -2.434002 | 2.288496  |
| H  | 5.255038  | 1.581909  | 3.742129  |
| H  | 6.774573  | -1.898504 | -4.295057 |
| H  | -2.209300 | -4.462233 | 4.952055  |
| H  | -4.236328 | -4.173376 | -4.165323 |
| H  | 7.154098  | -3.535362 | -2.460927 |
| H  | 4.754613  | -0.444575 | -4.251495 |
| H  | 6.708682  | 0.630911  | 1.962858  |
| H  | 2.889461  | 0.821131  | 3.943476  |
| H  | -4.728680 | -3.278637 | -1.885355 |
| H  | -1.932038 | -4.920990 | -4.721353 |
| H  | -0.431349 | -2.749964 | 4.546650  |
| H  | -3.055320 | -5.828959 | 3.055931  |
| Rh | 0.845643  | -1.607262 | -0.594822 |
| O  | 1.704026  | 0.349983  | -0.973596 |
| C  | 1.618581  | 1.242557  | -0.086121 |
| N  | 0.651040  | 1.198146  | 0.858655  |
| C  | -0.367730 | 0.220344  | 0.899544  |
| C  | -1.202029 | -0.116856 | -0.199660 |
| H  | 0.855408  | 1.680088  | 1.737209  |
| H  | 1.201835  | -2.183350 | -1.995862 |
| H  | -0.583029 | -1.182818 | -1.255316 |
| H  | -1.967576 | -0.824476 | 0.105586  |
| C  | -2.886700 | 2.365866  | -3.276074 |



|   |           |           |           |
|---|-----------|-----------|-----------|
| C | -3.493291 | 1.168183  | -2.885705 |
| C | -2.891593 | 0.364755  | -1.920607 |
| C | -1.675703 | 0.745611  | -1.316774 |
| C | -1.073573 | 1.945283  | -1.725258 |
| C | -1.680067 | 2.749918  | -2.689591 |
| H | -3.362442 | 3.000465  | -4.016756 |
| H | -4.439610 | 0.866340  | -3.325147 |
| H | -3.369453 | -0.562938 | -1.616763 |
| H | -0.167752 | 2.301882  | -1.261123 |
| H | -1.214962 | 3.695971  | -2.947223 |
| C | 2.596716  | -4.907400 | -0.426606 |
| H | 4.169163  | -4.211990 | 0.933026  |
| H | 2.551182  | -4.018435 | 1.588278  |
| H | 3.079777  | -5.884710 | -0.310679 |
| H | 2.897285  | -4.542423 | -1.415048 |
| H | 0.798896  | -5.720538 | -1.309291 |
| H | 0.810488  | -5.784442 | 0.444653  |
| C | 1.746807  | 3.830645  | 1.757299  |
| C | 0.894155  | 5.073977  | 2.023463  |
| N | 2.075762  | 3.633932  | 0.442273  |
| C | 2.561836  | 2.383734  | -0.059132 |
| C | 3.808787  | 2.174366  | -0.541253 |
| C | -0.785638 | -0.084396 | 2.299639  |
| N | -0.499997 | 4.721211  | 1.773585  |
| C | -0.991321 | 4.698222  | 0.512677  |
| C | -2.418431 | 4.209525  | 0.330100  |
| N | -2.802073 | 2.901064  | 0.736479  |
| C | -2.519292 | 2.185935  | 1.860711  |
| C | -3.033841 | 0.764707  | 1.862332  |
| N | -2.163671 | -0.167215 | 2.501448  |
| O | 0.005604  | -0.224827 | 3.226612  |
| C | -4.238229 | 0.443945  | 1.342644  |
| O | -1.856257 | 2.601185  | 2.816422  |
| C | -3.225037 | 4.914997  | -0.488492 |
| O | -0.345571 | 5.094085  | -0.466921 |
| O | 1.991435  | 3.014853  | 2.642459  |
| C | 4.984582  | 3.027643  | -0.606598 |
| C | -4.891509 | -0.852370 | 1.167893  |
| C | -4.580656 | 4.558858  | -0.925467 |
| C | -4.459560 | -2.065446 | 1.744382  |
| C | -5.142424 | -3.251970 | 1.481748  |
| C | -6.259379 | -3.263080 | 0.642054  |
| C | -6.698684 | -2.069454 | 0.061885  |
| C | -6.025405 | -0.880337 | 0.327119  |
| C | 5.041485  | 4.360660  | -0.148988 |
| C | 6.227438  | 5.083120  | -0.233269 |
| C | 7.377890  | 4.497988  | -0.772914 |
| C | 7.338142  | 3.178715  | -1.231648 |
| C | 6.154291  | 2.452384  | -1.148667 |
| C | -5.504038 | 3.878360  | -0.106357 |
| C | -6.758531 | 3.516657  | -0.594652 |
| C | -7.120522 | 3.829097  | -1.908418 |
| C | -6.228435 | 4.532928  | -2.721249 |
| C | -4.977173 | 4.902804  | -2.231207 |
| H | 1.166187  | 5.916896  | 1.383657  |
| H | 1.006900  | 5.349130  | 3.072431  |
| H | 1.627526  | 4.261656  | -0.225666 |
| H | 3.969394  | 1.170484  | -0.922913 |
| H | -0.992454 | 4.160600  | 2.473852  |
| H | -3.288222 | 2.392856  | 0.005815  |
| H | -2.380908 | -0.381681 | 3.471459  |
| H | -4.817589 | 1.275573  | 0.947205  |

|   |           |           |           |
|---|-----------|-----------|-----------|
| H | -2.779574 | 5.792367  | -0.949418 |
| H | -3.590803 | -2.087825 | 2.389725  |
| H | -4.793097 | -4.172999 | 1.936857  |
| H | -6.787048 | -4.192260 | 0.447187  |
| H | -7.568880 | -2.064722 | -0.588251 |
| H | -6.370930 | 0.046615  | -0.125264 |
| H | 4.158126  | 4.819957  | 0.275316  |
| H | 6.257879  | 6.108408  | 0.124081  |
| H | 8.300000  | 5.068775  | -0.835199 |
| H | 8.227828  | 2.719493  | -1.652673 |
| H | 6.122101  | 1.425372  | -1.505301 |
| H | -5.248548 | 3.668066  | 0.927175  |
| H | -7.462955 | 3.008226  | 0.058487  |
| H | -8.098404 | 3.546670  | -2.287566 |
| H | -6.510617 | 4.800699  | -3.735530 |
| H | -4.287531 | 5.452212  | -2.866866 |

Sum of electronic and zero-point energy: -3953.492664

Sum of electronic and thermal free energies: -3953.600379

Frequency: -616.2573

**Supplementary Table 14. O3R<sup>TS</sup> representative 3**

|    |           |           |           |
|----|-----------|-----------|-----------|
| C  | 4.801468  | -2.873569 | -0.469041 |
| C  | 5.533082  | -0.593255 | 0.515108  |
| P  | 3.940155  | 0.303131  | 0.889676  |
| P  | 2.950573  | -2.715735 | -0.456035 |
| C  | 5.464694  | 4.544856  | -0.253755 |
| C  | 5.125519  | 3.616444  | -1.242991 |
| C  | 4.619174  | 2.366859  | -0.886488 |
| C  | 4.461233  | 2.023346  | 0.467525  |
| C  | 4.786437  | 2.966357  | 1.452896  |
| C  | 5.283575  | 4.221113  | 1.091548  |
| H  | 4.337816  | 1.661182  | -1.662065 |
| H  | 4.661892  | 2.724341  | 2.502898  |
| C  | 3.489360  | 0.380589  | 5.514328  |
| C  | 4.735592  | 0.078997  | 4.960265  |
| C  | 4.896080  | 0.036984  | 3.574733  |
| C  | 3.805993  | 0.291119  | 2.723717  |
| C  | 2.556437  | 0.585435  | 3.291176  |
| C  | 2.401522  | 0.633561  | 4.677440  |
| H  | 5.878058  | -0.187827 | 3.171543  |
| H  | 1.691810  | 0.742756  | 2.656563  |
| C  | 1.471032  | -5.125795 | -4.146842 |
| C  | 2.609348  | -4.321183 | -4.241334 |
| C  | 3.068246  | -3.619763 | -3.126289 |
| C  | 2.403858  | -3.727157 | -1.893413 |
| C  | 1.258817  | -4.534724 | -1.809612 |
| C  | 0.795103  | -5.226613 | -2.930547 |
| H  | 3.939133  | -2.979961 | -3.231238 |
| H  | 0.725976  | -4.634058 | -0.869379 |
| C  | 1.922330  | -5.168077 | 3.349011  |
| C  | 1.672218  | -3.796885 | 3.312s    |
| C  | 1.957167  | -3.060387 | 2.158370  |
| C  | 2.490057  | -3.695389 | 1.028891  |
| C  | 2.744494  | -5.079596 | 1.074719  |
| C  | 2.460496  | -5.808779 | 2.227741  |
| H  | 1.758708  | -1.995431 | 2.150967  |
| H  | 3.154560  | -5.591509 | 0.208594  |
| H  | 3.368295  | 0.413924  | 6.593518  |
| H  | 5.867693  | 5.514814  | -0.532247 |
| H  | 1.704035  | -5.739384 | 4.247022  |
| H  | 1.112880  | -5.667095 | -5.017766 |
| H  | 5.535794  | 4.940509  | 1.865519  |
| H  | 5.251905  | 3.866104  | -2.292840 |
| H  | 1.425304  | 0.858479  | 5.096756  |
| H  | 5.586493  | -0.121001 | 5.605513  |
| H  | -0.096982 | -5.840529 | -2.846454 |
| H  | 3.140431  | -4.235163 | -5.185037 |
| H  | 2.661650  | -6.876130 | 2.252870  |
| H  | 1.258926  | -3.286897 | 4.177379  |
| Rh | 2.199875  | -0.550029 | -0.595351 |
| O  | 1.576086  | 1.493811  | -1.029708 |
| C  | 0.490660  | 1.936750  | -0.565104 |
| N  | -0.378431 | 1.133936  | 0.079888  |
| C  | -0.339663 | -0.280854 | 0.060052  |
| C  | -0.298874 | -0.991015 | -1.157089 |
| H  | -1.165604 | 1.549114  | 0.571422  |
| H  | 3.285966  | -0.502048 | -1.714807 |
| H  | 1.199153  | -1.096029 | -1.742302 |
| H  | -0.393597 | -2.068737 | -1.027331 |
| C  | -1.916165 | 0.247007  | -4.964331 |
| C  | -0.835883 | -0.638789 | -4.915773 |

|   |            |           |           |
|---|------------|-----------|-----------|
| C | -0.284447  | -1.007144 | -3.690781 |
| C | -0.800841  | -0.496322 | -2.488565 |
| C | -1.893197  | 0.379273  | -2.548127 |
| C | -2.444889  | 0.749918  | -3.775919 |
| H | -2.341396  | 0.537802  | -5.920887 |
| H | -0.418886  | -1.041666 | -5.834603 |
| H | 0.562159   | -1.688341 | -3.667272 |
| H | -2.340798  | 0.769771  | -1.644175 |
| H | -3.291807  | 1.429750  | -3.785346 |
| C | 5.517651   | -2.123272 | 0.667760  |
| H | 5.781241   | -0.322246 | -0.517887 |
| H | 6.322232   | -0.157634 | 1.136604  |
| H | 5.096907   | -2.412985 | 1.638301  |
| H | 6.558707   | -2.469293 | 0.676637  |
| H | 5.027644   | -3.944361 | -0.409407 |
| H | 5.167043   | -2.515240 | -1.437247 |
| C | -1.767562  | 4.510806  | 0.479280  |
| C | -3.299940  | 4.730609  | 0.413027  |
| N | -1.283051  | 3.647015  | -0.486913 |
| C | 0.094414   | 3.361307  | -0.701195 |
| C | 1.052652   | 4.278172  | -0.980712 |
| C | -0.725015  | -0.905604 | 1.369511  |
| N | -4.125063  | 3.600909  | 0.835553  |
| C | -4.339403  | 2.524347  | 0.040250  |
| C | -5.276700  | 1.472840  | 0.585586  |
| N | -4.806596  | 0.146877  | 0.475532  |
| C | -3.516933  | -0.162795 | 0.823168  |
| C | -2.989525  | -1.552983 | 0.607392  |
| N | -1.780951  | -1.828937 | 1.325432  |
| O | -0.157193  | -0.675738 | 2.429043  |
| C | -3.625617  | -2.470591 | -0.159699 |
| O | -2.797482  | 0.711068  | 1.319861  |
| C | -6.529296  | 1.796427  | 0.974252  |
| O | -3.842177  | 2.418323  | -1.086416 |
| O | -1.074963  | 5.096910  | 1.289088  |
| C | 0.950013   | 5.710498  | -1.247859 |
| C | -3.303501  | -3.863433 | -0.464995 |
| C | -7.608578  | 0.912694  | 1.436334  |
| C | -2.284110  | -4.612787 | 0.162252  |
| C | -2.071957  | -5.945153 | -0.184334 |
| C | -2.861897  | -6.561391 | -1.160324 |
| C | -3.873745  | -5.834064 | -1.791951 |
| C | -4.093279  | -4.504949 | -1.443107 |
| C | -0.210034  | 6.337543  | -1.745082 |
| C | -0.214977  | 7.700200  | -2.025075 |
| C | 0.929677   | 8.472053  | -1.802761 |
| C | 2.089390   | 7.865493  | -1.316535 |
| C | 2.102645   | 6.497585  | -1.056314 |
| C | -7.384326  | -0.282178 | 2.150276  |
| C | -8.454242  | -1.071604 | 2.569231  |
| C | -9.767208  | -0.690053 | 2.284212  |
| C | -10.006327 | 0.499835  | 1.592044  |
| C | -8.939879  | 1.295585  | 1.181675  |
| H | -3.587896  | 4.993296  | -0.610285 |
| H | -3.516313  | 5.573912  | 1.069478  |
| H | -1.988254  | 3.167236  | -1.048406 |
| H | 2.063197   | 3.877352  | -0.998165 |
| H | -4.376094  | 3.526013  | 1.811974  |
| H | -5.487359  | -0.582807 | 0.309411  |
| H | -1.931361  | -2.202712 | 2.261640  |
| H | -4.523825  | -2.122938 | -0.665934 |
| H | -6.801729  | 2.843281  | 0.860567  |

|   |            |           |           |
|---|------------|-----------|-----------|
| H | -1.664596  | -4.152422 | 0.920731  |
| H | -1.292810  | -6.509855 | 0.320370  |
| H | -2.697573  | -7.604052 | -1.417392 |
| H | -4.495564  | -6.304173 | -2.548024 |
| H | -4.887030  | -3.946578 | -1.933369 |
| H | -1.097953  | 5.747234  | -1.940877 |
| H | -1.113920  | 8.164792  | -2.420725 |
| H | 0.918199   | 9.537365  | -2.015190 |
| H | 2.984966   | 8.457019  | -1.148565 |
| H | 3.008323   | 6.023811  | -0.687942 |
| H | -6.373588  | -0.569259 | 2.423201  |
| H | -8.262233  | -1.981294 | 3.131343  |
| H | -10.598322 | -1.308056 | 2.611116  |
| H | -11.024650 | 0.810986  | 1.377776  |
| H | -9.132310  | 2.222938  | 0.648017  |

Sum of electronic and zero-point energy: -3953.487473  
Sum of electronic and thermal free energies: -3953.603549  
Frequency: -600.0306

**Supplementary Table 15. O3R<sup>TS</sup> representative 4**

|    |           |           |           |
|----|-----------|-----------|-----------|
| C  | 1.616949  | -3.758152 | 1.532280  |
| C  | 3.335749  | -2.004879 | 2.405008  |
| P  | 3.373517  | -0.827610 | 0.977706  |
| P  | 1.393854  | -3.263042 | -0.238705 |
| C  | 7.237397  | -1.641309 | -1.452768 |
| C  | 6.248227  | -0.779247 | -1.937160 |
| C  | 5.102389  | -0.536243 | -1.181560 |
| C  | 4.939842  | -1.139241 | 0.079441  |
| C  | 5.943849  | -1.987456 | 0.564529  |
| C  | 7.082905  | -2.242942 | -0.203287 |
| H  | 4.319967  | 0.108677  | -1.572370 |
| H  | 5.848083  | -2.465535 | 1.533601  |
| C  | 3.948228  | 3.338620  | 2.988474  |
| C  | 4.691407  | 2.998994  | 1.855032  |
| C  | 4.533889  | 1.747174  | 1.259105  |
| C  | 3.612539  | 0.820304  | 1.774980  |
| C  | 2.840931  | 1.182002  | 2.892817  |
| C  | 3.025207  | 2.424120  | 3.505247  |
| H  | 5.139192  | 1.497664  | 0.395273  |
| H  | 2.085054  | 0.510227  | 3.280275  |
| C  | 4.430250  | -6.120293 | -2.258631 |
| C  | 3.270881  | -6.619009 | -1.655447 |
| C  | 2.351932  | -5.744440 | -1.079662 |
| C  | 2.582312  | -4.356756 | -1.106313 |
| C  | 3.739909  | -3.864679 | -1.719304 |
| C  | 4.661990  | -4.745287 | -2.289767 |
| H  | 1.447808  | -6.140875 | -0.624840 |
| H  | 3.923508  | -2.798991 | -1.752158 |
| C  | -2.770887 | -4.602039 | -1.745247 |
| C  | -1.749209 | -4.263831 | -2.639206 |
| C  | -0.493320 | -3.907186 | -2.156624 |
| C  | -0.242120 | -3.888414 | -0.772737 |
| C  | -1.269169 | -4.226655 | 0.117960  |
| C  | -2.530182 | -4.585260 | -0.372010 |
| H  | 0.295096  | -3.635405 | -2.852844 |
| H  | -1.106778 | -4.205732 | 1.191357  |
| H  | 4.084471  | 4.305765  | 3.464391  |
| H  | 8.124494  | -1.840535 | -2.047131 |
| H  | -3.752368 | -4.879584 | -2.119037 |
| H  | 5.145709  | -6.804436 | -2.705937 |
| H  | 7.848267  | -2.912561 | 0.178226  |
| H  | 6.363994  | -0.305596 | -2.907811 |
| H  | 2.436870  | 2.679294  | 4.382646  |
| H  | 5.405372  | 3.703753  | 1.438915  |
| H  | 5.558771  | -4.347355 | -2.755211 |
| H  | 3.081497  | -7.688409 | -1.637792 |
| H  | -3.319981 | -4.848120 | 0.321201  |
| H  | -1.931805 | -4.275212 | -3.709718 |
| Rh | 1.512166  | -1.012575 | -0.505047 |
| O  | 1.752570  | 1.134321  | -0.872647 |
| C  | 1.138865  | 1.852970  | -0.035878 |
| N  | 0.211304  | 1.321706  | 0.777047  |
| C  | -0.192727 | -0.043494 | 0.700569  |
| C  | -0.829141 | -0.594990 | -0.465350 |
| H  | -0.259602 | 1.928941  | 1.442249  |
| H  | 2.452422  | -1.384993 | -1.710603 |
| H  | 0.251431  | -1.129672 | -1.554305 |
| H  | -1.253987 | -1.570386 | -0.243913 |
| C  | -3.390714 | 1.281002  | -3.356048 |

|   |           |           |           |
|---|-----------|-----------|-----------|
| C | -3.666283 | 0.009812  | -2.846587 |
| C | -2.780400 | -0.587319 | -1.949541 |
| C | -1.618948 | 0.088736  | -1.528424 |
| C | -1.335597 | 1.348788  | -2.074344 |
| C | -2.219779 | 1.939918  | -2.977044 |
| H | -4.083387 | 1.755788  | -4.044303 |
| H | -4.571491 | -0.513348 | -3.141154 |
| H | -2.996087 | -1.577886 | -1.556621 |
| H | -0.429822 | 1.872996  | -1.810309 |
| H | -2.010001 | 2.935067  | -3.354417 |
| C | 3.042042  | -3.477567 | 2.058900  |
| H | 4.282985  | -1.921872 | 2.948622  |
| H | 2.549895  | -1.627229 | 3.061347  |
| H | 3.166355  | -4.053799 | 2.983271  |
| H | 3.785344  | -3.871177 | 1.355286  |
| H | 0.880362  | -3.219025 | 2.137191  |
| H | 1.403554  | -4.831009 | 1.601510  |
| C | 0.110240  | 4.970928  | 1.479295  |
| C | -0.984253 | 5.140536  | 0.432784  |
| N | 0.979108  | 3.898705  | 1.305773  |
| C | 1.382007  | 3.305585  | 0.077806  |
| C | 1.963922  | 3.952638  | -0.959720 |
| C | -0.481338 | -0.619571 | 2.065211  |
| N | -1.878193 | 3.988575  | 0.487438  |
| C | -2.907180 | 3.906692  | -0.394777 |
| C | -3.928113 | 2.802959  | -0.180708 |
| N | -3.614441 | 1.524166  | 0.373821  |
| C | -2.897826 | 1.117094  | 1.448791  |
| C | -2.943339 | -0.372170 | 1.718396  |
| N | -1.798915 | -0.911692 | 2.353246  |
| O | 0.379303  | -0.828955 | 2.917197  |
| C | -4.081435 | -1.080878 | 1.531059  |
| O | -2.234157 | 1.854423  | 2.195069  |
| C | -5.128847 | 2.955346  | -0.775859 |
| O | -3.033826 | 4.687915  | -1.334764 |
| O | 0.187565  | 5.672669  | 2.471073  |
| C | 2.340916  | 5.356337  | -1.092311 |
| C | -4.416017 | -2.478881 | 1.807401  |
| C | -6.225153 | 1.975116  | -0.784914 |
| C | -3.689432 | -3.351950 | 2.643141  |
| C | -4.124291 | -4.657901 | 2.860820  |
| C | -5.282339 | -5.133591 | 2.238979  |
| C | -6.011793 | -4.285351 | 1.401081  |
| C | -5.590422 | -2.973844 | 1.199973  |
| C | 2.614361  | 6.207249  | 0.000175  |
| C | 2.973578  | 7.534474  | -0.214566 |
| C | 3.063225  | 8.043191  | -1.514084 |
| C | 2.809887  | 7.209755  | -2.606286 |
| C | 2.463730  | 5.877888  | -2.396838 |
| C | -6.630459 | 1.287917  | 0.374831  |
| C | -7.645259 | 0.332074  | 0.319114  |
| C | -8.272168 | 0.043610  | -0.896881 |
| C | -7.896568 | 0.737289  | -2.050811 |
| C | -6.891711 | 1.702282  | -1.992990 |
| H | -0.571294 | 5.225824  | -0.576382 |
| H | -1.511645 | 6.071393  | 0.661082  |
| H | 1.628876  | 3.788138  | 2.081088  |
| H | 2.141251  | 3.334735  | -1.837521 |
| H | -1.959297 | 3.454485  | 1.352658  |
| H | -3.993304 | 0.771140  | -0.189691 |
| H | -1.910490 | -1.242673 | 3.305991  |
| H | -4.916952 | -0.525139 | 1.115282  |

|   |           |           |           |
|---|-----------|-----------|-----------|
| H | -5.245284 | 3.852424  | -1.377190 |
| H | -2.785302 | -3.022965 | 3.136097  |
| H | -3.555952 | -5.307556 | 3.520284  |
| H | -5.616209 | -6.152395 | 2.411889  |
| H | -6.916175 | -4.641904 | 0.916726  |
| H | -6.173983 | -2.312761 | 0.563304  |
| H | 2.565627  | 5.830556  | 1.013861  |
| H | 3.183713  | 8.175521  | 0.636438  |
| H | 3.336429  | 9.082191  | -1.673848 |
| H | 2.886854  | 7.596048  | -3.618302 |
| H | 2.272412  | 5.229423  | -3.248318 |
| H | -6.164959 | 1.530683  | 1.325405  |
| H | -7.957335 | -0.175073 | 1.228234  |
| H | -9.063847 | -0.698898 | -0.940138 |
| H | -8.393862 | 0.532989  | -2.994748 |
| H | -6.605003 | 2.243393  | -2.890795 |

Sum of electronic and zero-point energy: -3953.499257  
Sum of electronic and thermal free energies: -3953.607378  
Frequency: -735.6902



**Supplementary Table 16. O3R<sup>TS</sup> representative 5**

|    |           |           |           |
|----|-----------|-----------|-----------|
| C  | 1.672789  | 2.540219  | 1.627398  |
| C  | -0.857513 | 2.056497  | 2.100036  |
| P  | -1.494817 | 2.194706  | 0.368122  |
| P  | 1.697208  | 2.659549  | -0.219069 |
| C  | -2.563805 | 6.682102  | -0.159887 |
| C  | -2.171009 | 5.920505  | -1.260790 |
| C  | -1.825762 | 4.578224  | -1.097629 |
| C  | -1.868294 | 3.980853  | 0.168404  |
| C  | -2.289743 | 4.749364  | 1.267601  |
| C  | -2.626668 | 6.092387  | 1.105166  |
| H  | -1.511555 | 3.993687  | -1.955386 |
| H  | -2.365852 | 4.303600  | 2.254426  |
| C  | -5.662148 | 0.161564  | 0.255705  |
| C  | -5.538438 | 1.500280  | -0.123487 |
| C  | -4.295376 | 2.134832  | -0.077564 |
| C  | -3.159567 | 1.429324  | 0.351482  |
| C  | -3.291919 | 0.085691  | 0.717594  |
| C  | -4.533777 | -0.544634 | 0.677935  |
| H  | -4.216403 | 3.174744  | -0.374610 |
| H  | -2.427384 | -0.485989 | 1.024442  |
| C  | 1.452949  | 7.135501  | -1.408593 |
| C  | 1.242243  | 6.138209  | -2.363399 |
| C  | 1.278466  | 4.795764  | -1.992108 |
| C  | 1.553718  | 4.430663  | -0.664893 |
| C  | 1.778496  | 5.437949  | 0.285351  |
| C  | 1.715710  | 6.782499  | -0.084551 |
| H  | 1.068244  | 4.028491  | -2.730563 |
| H  | 2.003798  | 5.189543  | 1.316680  |
| C  | 5.913795  | 1.300326  | -1.595708 |
| C  | 5.093135  | 2.051670  | -2.442407 |
| C  | 3.850084  | 2.495573  | -1.997675 |
| C  | 3.414012  | 2.202230  | -0.694526 |
| C  | 4.246794  | 1.456788  | 0.154963  |
| C  | 5.489460  | 1.007647  | -0.300046 |
| H  | 3.220699  | 3.067436  | -2.670992 |
| H  | 3.923415  | 1.171660  | 1.146810  |
| H  | -6.628132 | -0.332978 | 0.209561  |
| H  | -2.824512 | 7.729040  | -0.286011 |
| H  | 6.877238  | 0.942289  | -1.947313 |
| H  | 1.410113  | 8.182427  | -1.694613 |
| H  | -2.942497 | 6.676307  | 1.965003  |
| H  | -2.121360 | 6.371233  | -2.247458 |
| H  | -4.599390 | -1.591453 | 0.953457  |
| H  | -6.410499 | 2.057055  | -0.455164 |
| H  | 1.878280  | 7.552322  | 0.664144  |
| H  | 1.033890  | 6.404827  | -3.395657 |
| H  | 6.110577  | 0.408584  | 0.357676  |
| H  | 5.417464  | 2.286712  | -3.451954 |
| Rh | 0.135008  | 1.250665  | -1.126808 |
| O  | -1.500213 | -0.130550 | -1.841450 |
| C  | -1.408331 | -1.317870 | -1.437465 |
| N  | -0.322003 | -1.750553 | -0.772654 |
| C  | 0.745278  | -0.884458 | -0.386395 |
| C  | 1.712673  | -0.519809 | -1.363015 |
| H  | -0.109142 | -2.750751 | -0.794987 |
| H  | -0.223328 | 2.412042  | -2.117164 |
| H  | 1.220612  | 0.905742  | -2.290614 |
| H  | 2.618433  | -0.116694 | -0.924851 |
| C  | 2.612042  | -2.844949 | -4.853392 |

|   |           |           |           |
|---|-----------|-----------|-----------|
| C | 3.589510  | -2.543532 | -3.902997 |
| C | 3.272211  | -1.748146 | -2.802145 |
| C | 1.965003  | -1.266907 | -2.624645 |
| C | 0.997155  | -1.543113 | -3.601006 |
| C | 1.320956  | -2.330480 | -4.704897 |
| H | 2.858893  | -3.457845 | -5.715489 |
| H | 4.603900  | -2.913989 | -4.024121 |
| H | 4.036172  | -1.505855 | -2.069100 |
| H | 0.012146  | -1.097862 | -3.522315 |
| H | 0.565598  | -2.532681 | -5.459184 |
| C | 0.379363  | 2.936827  | 2.366213  |
| H | -1.648573 | 2.295715  | 2.815874  |
| H | -0.614493 | 1.001198  | 2.252454  |
| H | 0.598239  | 2.857610  | 3.438122  |
| H | 0.136963  | 3.987551  | 2.177522  |
| H | 1.902906  | 1.492376  | 1.840894  |
| H | 2.513914  | 3.133794  | 2.004053  |
| C | -2.160460 | -3.761469 | 0.365706  |
| C | -1.538823 | -5.082602 | 0.861729  |
| N | -2.275488 | -3.600072 | -0.988144 |
| C | -2.504476 | -2.310992 | -1.586001 |
| C | -3.664700 | -1.920530 | -2.157870 |
| C | 1.160165  | -0.994824 | 1.033784  |
| N | -0.199931 | -4.814784 | 1.375834  |
| C | 0.772236  | -4.424048 | 0.511439  |
| C | 2.051638  | -3.913403 | 1.072153  |
| N | 2.209815  | -3.860007 | 2.486313  |
| C | 1.872072  | -2.879963 | 3.428651  |
| C | 0.694148  | -1.963405 | 3.204975  |
| N | 0.285587  | -1.648094 | 1.880215  |
| O | 2.246759  | -0.580757 | 1.450863  |
| C | 0.121007  | -1.478043 | 4.323951  |
| O | 2.495355  | -2.865705 | 4.480627  |
| C | 3.055702  | -3.651200 | 0.200151  |
| O | 0.548269  | -4.437788 | -0.715676 |
| O | -2.456595 | -2.886659 | 1.177530  |
| C | -4.947322 | -2.592136 | -2.299447 |
| C | -1.024391 | -0.571286 | 4.472047  |
| C | 4.409580  | -3.162802 | 0.445516  |
| C | -2.244508 | -0.770194 | 3.808327  |
| C | -3.310274 | 0.107782  | 4.017179  |
| C | -3.170368 | 1.196258  | 4.879803  |
| C | -1.959906 | 1.398620  | 5.551984  |
| C | -0.901718 | 0.512658  | 5.362559  |
| C | -5.186722 | -3.946846 | -1.986145 |
| C | -6.460732 | -4.488142 | -2.124500 |
| C | -7.522324 | -3.695356 | -2.573775 |
| C | -7.302534 | -2.352586 | -2.890741 |
| C | -6.027940 | -1.809607 | -2.759622 |
| C | 4.818064  | -2.464817 | 1.602584  |
| C | 6.141284  | -2.052269 | 1.744160  |
| C | 7.082135  | -2.316192 | 0.744141  |
| C | 6.688460  | -2.987013 | -0.417297 |
| C | 5.367834  | -3.400240 | -0.564262 |
| H | -1.484152 | -5.841088 | 0.076171  |
| H | -2.156299 | -5.455023 | 1.680716  |
| H | -1.807863 | -4.299262 | -1.556769 |
| H | -3.638945 | -0.897824 | -2.527139 |
| H | -0.039747 | -4.736579 | 2.370983  |
| H | 3.050281  | -4.328930 | 2.816726  |
| H | -0.644254 | -1.903686 | 1.563177  |
| H | 0.610393  | -1.781684 | 5.246592  |

|   |           |           |           |
|---|-----------|-----------|-----------|
| H | 2.821522  | -3.877052 | -0.837357 |
| H | -2.372576 | -1.628733 | 3.157989  |
| H | -4.248137 | -0.058796 | 3.497829  |
| H | -4.003478 | 1.874992  | 5.039846  |
| H | -1.847787 | 2.235238  | 6.236091  |
| H | 0.032511  | 0.657485  | 5.899130  |
| H | -4.373800 | -4.570754 | -1.637752 |
| H | -6.629596 | -5.533624 | -1.883240 |
| H | -8.514555 | -4.124528 | -2.679101 |
| H | -8.121759 | -1.732796 | -3.242963 |
| H | -5.858475 | -0.763204 | -2.999179 |
| H | 4.104981  | -2.202593 | 2.371028  |
| H | 6.437697  | -1.518400 | 2.642693  |
| H | 8.113367  | -1.996974 | 0.866928  |
| H | 7.410272  | -3.191049 | -1.202886 |
| H | 5.062635  | -3.922172 | -1.467454 |

Sum of electronic and zero-point energy: -3953.514967  
Sum of electronic and thermal free energies: -3953.619657  
Frequency: -557.7065

**Supplementary Table 17. O4R<sup>TS</sup> representative 1**

|    |           |           |           |
|----|-----------|-----------|-----------|
| C  | -4.317272 | 0.890639  | 2.530207  |
| C  | -3.753831 | -1.633699 | 2.377980  |
| P  | -3.458669 | -1.844896 | 0.564269  |
| P  | -4.246868 | 1.414034  | 0.753340  |
| C  | -7.328771 | -3.479198 | -1.396012 |
| C  | -6.236064 | -3.073785 | -2.169936 |
| C  | -5.081615 | -2.596517 | -1.552856 |
| C  | -5.003220 | -2.523322 | -0.150317 |
| C  | -6.090162 | -2.959141 | 0.618182  |
| C  | -7.251320 | -3.426256 | -0.004155 |
| H  | -4.238914 | -2.269121 | -2.155811 |
| H  | -6.048706 | -2.938717 | 1.702011  |
| C  | -0.452488 | -5.360896 | 0.181204  |
| C  | -0.006959 | -4.088628 | 0.549231  |
| C  | -0.919808 | -3.045482 | 0.700590  |
| C  | -2.287190 | -3.255652 | 0.463048  |
| C  | -2.727588 | -4.540092 | 0.107299  |
| C  | -1.813342 | -5.587452 | -0.023959 |
| H  | -0.557568 | -2.058966 | 0.966386  |
| H  | -3.779233 | -4.726012 | -0.080616 |
| C  | -8.803374 | 1.458604  | -0.135981 |
| C  | -7.989566 | 0.539695  | -0.797341 |
| C  | -6.609633 | 0.538770  | -0.580619 |
| C  | -6.031254 | 1.451258  | 0.309201  |
| C  | -6.859434 | 2.376378  | 0.973013  |
| C  | -8.234114 | 2.381559  | 0.747084  |
| H  | -5.991011 | -0.176897 | -1.105434 |
| H  | -6.428533 | 3.105176  | 1.653842  |
| C  | -2.857408 | 5.828662  | 0.720204  |
| C  | -3.728146 | 5.350516  | -0.263264 |
| C  | -4.176918 | 4.031717  | -0.218823 |
| C  | -3.763493 | 3.178686  | 0.817519  |
| C  | -2.883928 | 3.660761  | 1.800162  |
| C  | -2.437348 | 4.983343  | 1.748439  |
| H  | -4.851738 | 3.666098  | -0.987453 |
| H  | -2.507978 | 3.005015  | 2.577248  |
| H  | 0.264462  | -6.165118 | 0.044214  |
| H  | -8.232618 | -3.841457 | -1.877446 |
| H  | -2.505068 | 6.855403  | 0.681331  |
| H  | -9.875952 | 1.461934  | -0.308232 |
| H  | -8.092761 | -3.748711 | 0.602283  |
| H  | -6.285746 | -3.124731 | -3.253850 |
| H  | -2.168324 | -6.575160 | -0.304468 |
| H  | 1.053123  | -3.903911 | 0.667512  |
| H  | -8.860652 | 3.106839  | 1.258258  |
| H  | -8.419106 | -0.183157 | -1.484626 |
| H  | -1.752491 | 5.345481  | 2.509530  |
| H  | -4.055474 | 6.003364  | -1.067166 |
| Rh | -2.820225 | 0.172220  | -0.553177 |
| O  | -1.658304 | -1.197370 | -1.858646 |
| C  | -0.413995 | -1.114078 | -1.720499 |
| N  | 0.179998  | -0.305828 | -0.826550 |
| C  | -0.573324 | 0.571075  | 0.021896  |
| C  | -1.154617 | 1.781127  | -0.548994 |
| H  | 1.175935  | -0.131007 | -0.949349 |
| H  | -4.080190 | 0.026813  | -1.455419 |
| H  | -2.485865 | 1.542854  | -1.432881 |
| H  | -1.476436 | 2.499161  | 0.194527  |
| C  | 1.026205  | 3.559892  | -3.807697 |

|   |           |           |           |
|---|-----------|-----------|-----------|
| C | 1.034315  | 4.131406  | -2.533486 |
| C | 0.286718  | 3.564146  | -1.501555 |
| C | -0.470764 | 2.407538  | -1.734706 |
| C | -0.497128 | 1.853524  | -3.020459 |
| C | 0.251793  | 2.423668  | -4.050043 |
| H | 1.606509  | 4.006034  | -4.610442 |
| H | 1.618350  | 5.028175  | -2.343122 |
| H | 0.311274  | 3.994238  | -0.505729 |
| H | -1.129053 | 0.992296  | -3.218582 |
| H | 0.219383  | 1.987087  | -5.044607 |
| C | -4.785455 | -0.553920 | 2.760378  |
| H | -2.773317 | -1.373686 | 2.793638  |
| H | -4.037876 | -2.606333 | 2.795083  |
| H | -4.990923 | -0.663090 | 3.832167  |
| H | -5.739793 | -0.725876 | 2.249548  |
| H | -3.323016 | 1.033249  | 2.951754  |
| H | -5.010420 | 1.585726  | 3.016808  |
| C | 0.466372  | -2.001472 | -2.596048 |
| C | -0.361242 | 0.525744  | 1.487465  |
| O | -1.237765 | 0.800715  | 2.306666  |
| N | 0.877670  | 0.071856  | 1.953187  |
| C | 2.147932  | 0.531556  | 1.515637  |
| C | 3.283182  | -0.175819 | 1.748287  |
| C | 3.502444  | -1.546429 | 2.193733  |
| C | 2.204281  | 1.968480  | 1.066601  |
| N | 1.879505  | -1.703816 | -2.519001 |
| C | 2.730041  | -2.459344 | -1.766103 |
| C | 4.132338  | -1.919945 | -1.513946 |
| N | 4.422687  | -0.573169 | -1.151695 |
| C | 3.706270  | 0.581510  | -1.183221 |
| C | 4.276596  | 1.702085  | -0.358552 |
| N | 3.320569  | 2.423172  | 0.380726  |
| O | 1.305438  | 2.750654  | 1.358090  |
| C | 5.577152  | 2.062517  | -0.465127 |
| O | 2.636393  | 0.754865  | -1.780868 |
| C | 5.114393  | -2.843615 | -1.406285 |
| O | 2.430593  | -3.570685 | -1.339189 |
| C | 6.305057  | 3.137362  | 0.211033  |
| C | 6.525201  | -2.622194 | -1.068230 |
| C | 5.889651  | 3.725190  | 1.424597  |
| C | 6.651673  | 4.725444  | 2.023321  |
| C | 7.835839  | 5.167406  | 1.426808  |
| C | 8.265636  | 4.588626  | 0.229928  |
| C | 7.512633  | 3.580405  | -0.365347 |
| C | 2.484755  | -2.482913 | 2.470681  |
| C | 2.804420  | -3.789285 | 2.830011  |
| C | 4.138699  | -4.194248 | 2.927775  |
| C | 5.160080  | -3.280294 | 2.656853  |
| C | 4.844140  | -1.975060 | 2.294769  |
| C | 7.271561  | -1.521101 | -1.534544 |
| C | 8.599539  | -1.344240 | -1.145982 |
| C | 9.209603  | -2.262457 | -0.288608 |
| C | 8.490291  | -3.374647 | 0.159649  |
| C | 7.166968  | -3.558202 | -0.233666 |
| H | 0.103164  | -1.910363 | -3.624331 |
| H | 0.308656  | -3.034043 | -2.271193 |
| H | 0.828374  | -0.059033 | 2.961307  |
| H | 4.206951  | 0.367971  | 1.581504  |
| H | 2.171628  | -0.757739 | -2.749142 |
| H | 5.260960  | -0.513379 | -0.582281 |
| H | 3.316356  | 3.432136  | 0.267576  |
| H | 6.161123  | 1.512517  | -1.201145 |

|   |           |           |           |
|---|-----------|-----------|-----------|
| H | 4.786902  | -3.874897 | -1.490286 |
| H | 4.987872  | 3.377509  | 1.915584  |
| H | 6.321517  | 5.159671  | 2.962695  |
| H | 8.422786  | 5.951988  | 1.895250  |
| H | 9.188786  | 4.920132  | -0.236441 |
| H | 7.854423  | 3.130143  | -1.294450 |
| H | 1.446025  | -2.194224 | 2.383014  |
| H | 2.004358  | -4.496627 | 3.028048  |
| H | 4.379333  | -5.214316 | 3.212829  |
| H | 6.200857  | -3.582246 | 2.721045  |
| H | 5.646624  | -1.273250 | 2.078639  |
| H | 6.822905  | -0.829377 | -2.242163 |
| H | 9.162299  | -0.495685 | -1.524778 |
| H | 10.243128 | -2.122925 | 0.014301  |
| H | 8.965567  | -4.103356 | 0.810279  |
| H | 6.608403  | -4.420928 | 0.118430  |

Sum of electronic and zero-point energy: -3953.488855  
Sum of electronic and thermal free energies: -3953.597503  
Frequency: -767.4746

**Supplementary Table 18. O4R<sup>TS</sup> representative 2**

|    |           |           |           |
|----|-----------|-----------|-----------|
| C  | -3.190394 | 0.896842  | 2.409059  |
| C  | -1.659182 | -1.188554 | 2.611287  |
| P  | -1.938026 | -1.973080 | 0.963155  |
| P  | -4.036357 | 0.638771  | 0.784027  |
| C  | -4.975646 | -5.440633 | 1.574996  |
| C  | -4.647845 | -4.991598 | 0.292586  |
| C  | -3.742166 | -3.944484 | 0.129059  |
| C  | -3.137663 | -3.340746 | 1.244826  |
| C  | -3.459078 | -3.810082 | 2.525831  |
| C  | -4.380428 | -4.847368 | 2.688658  |
| H  | -3.528919 | -3.572282 | -0.868929 |
| H  | -3.003646 | -3.373424 | 3.408154  |
| C  | 1.899938  | -4.463215 | 0.097504  |
| C  | 1.895799  | -3.546351 | 1.146530  |
| C  | 0.763789  | -2.769591 | 1.411923  |
| C  | -0.382952 | -2.904370 | 0.617667  |
| C  | -0.369815 | -3.820003 | -0.451729 |
| C  | 0.759470  | -4.596466 | -0.706125 |
| H  | 0.805962  | -2.057953 | 2.228721  |
| H  | -1.243648 | -3.933066 | -1.081835 |
| C  | -8.015078 | -1.250867 | 2.234688  |
| C  | -7.663148 | 0.054256  | 2.594697  |
| C  | -6.477598 | 0.613268  | 2.123609  |
| C  | -5.627987 | -0.128636 | 1.281571  |
| C  | -5.996112 | -1.426341 | 0.913648  |
| C  | -7.182145 | -1.987151 | 1.393148  |
| H  | -6.222745 | 1.633816  | 2.396466  |
| H  | -5.359301 | -2.003137 | 0.257427  |
| C  | -5.296083 | 4.784574  | -0.837592 |
| C  | -4.311422 | 4.712933  | 0.147710  |
| C  | -3.923693 | 3.476250  | 0.671453  |
| C  | -4.532121 | 2.302039  | 0.206140  |
| C  | -5.521921 | 2.378105  | -0.788681 |
| C  | -5.902107 | 3.613770  | -1.305725 |
| H  | -3.129255 | 3.437157  | 1.405532  |
| H  | -5.994846 | 1.470819  | -1.154776 |
| H  | 2.779326  | -5.072125 | -0.094461 |
| H  | -5.690353 | -6.248341 | 1.704106  |
| H  | -5.591207 | 5.748046  | -1.243331 |
| H  | -8.938849 | -1.685689 | 2.605777  |
| H  | -4.629321 | -5.191059 | 3.688545  |
| H  | -5.106209 | -5.447897 | -0.580291 |
| H  | 0.744330  | -5.316736 | -1.520281 |
| H  | 2.778121  | -3.419600 | 1.765551  |
| H  | -7.444414 | -3.001248 | 1.106359  |
| H  | -8.314789 | 0.637539  | 3.238906  |
| H  | -6.669633 | 3.664530  | -2.072511 |
| H  | -3.833512 | 5.618534  | 0.509909  |
| Rh | -2.690105 | -0.433353 | -0.721924 |
| O  | -1.401796 | -1.538873 | -2.175252 |
| C  | -0.260217 | -1.036801 | -2.304231 |
| N  | 0.086055  | 0.120155  | -1.730364 |
| C  | -0.867000 | 0.925030  | -1.019653 |
| C  | -1.907937 | 1.545209  | -1.759149 |
| H  | 1.012838  | 0.493716  | -1.964820 |
| H  | -3.955125 | -1.325826 | -0.994623 |
| H  | -3.324190 | 0.555531  | -1.863269 |
| H  | -2.389475 | 2.358698  | -1.223333 |
| C  | -1.377390 | 2.307559  | -5.955229 |

|   |           |           |           |
|---|-----------|-----------|-----------|
| C | -1.070585 | 3.268284  | -4.987955 |
| C | -1.283226 | 2.996249  | -3.637038 |
| C | -1.795645 | 1.751295  | -3.238738 |
| C | -2.111567 | 0.795880  | -4.209909 |
| C | -1.901772 | 1.074972  | -5.562743 |
| H | -1.217498 | 2.522823  | -7.007880 |
| H | -0.670701 | 4.234114  | -5.284569 |
| H | -1.034354 | 3.739914  | -2.885232 |
| H | -2.528488 | -0.157932 | -3.904760 |
| H | -2.157542 | 0.328396  | -6.309623 |
| C | -2.863657 | -0.403250 | 3.165135  |
| H | -0.798519 | -0.518614 | 2.510671  |
| H | -1.356198 | -1.964169 | 3.322718  |
| H | -2.612894 | -0.124286 | 4.195055  |
| H | -3.754156 | -1.040169 | 3.228006  |
| H | -2.280199 | 1.473291  | 2.222360  |
| H | -3.863406 | 1.515518  | 3.013261  |
| C | 0.808878  | -1.723304 | -3.155358 |
| C | -0.402626 | 1.531435  | 0.255205  |
| O | -0.952177 | 2.502054  | 0.771359  |
| N | 0.704623  | 0.908312  | 0.780645  |
| C | 1.668669  | 1.493749  | 1.621229  |
| C | 2.140632  | 2.746999  | 1.481346  |
| C | 1.817209  | 3.641183  | 0.353432  |
| C | 2.183347  | 0.557676  | 2.674406  |
| N | 2.065866  | -1.989120 | -2.465562 |
| C | 2.977146  | -1.013332 | -2.197551 |
| C | 4.275177  | -1.488540 | -1.603830 |
| N | 4.772973  | -0.684739 | -0.556047 |
| C | 3.942482  | -0.366760 | 0.487998  |
| C | 4.405383  | 0.526933  | 1.593668  |
| N | 3.570493  | 0.478856  | 2.754746  |
| O | 1.453179  | -0.071053 | 3.430302  |
| C | 5.501665  | 1.314548  | 1.489860  |
| O | 2.797087  | -0.830401 | 0.495832  |
| C | 4.953168  | -2.525271 | -2.139936 |
| O | 2.780253  | 0.179983  | -2.453455 |
| C | 6.055351  | 2.311060  | 2.399004  |
| C | 6.239141  | -3.083962 | -1.703783 |
| C | 7.220291  | 2.988622  | 1.978902  |
| C | 7.804429  | 3.974430  | 2.767926  |
| C | 7.233071  | 4.310260  | 3.997755  |
| C | 6.076943  | 3.652398  | 4.429367  |
| C | 5.493045  | 2.661044  | 3.646605  |
| C | 2.024892  | 3.191270  | -0.962546 |
| C | 1.720471  | 4.012847  | -2.046615 |
| C | 1.206724  | 5.295523  | -1.831359 |
| C | 1.013548  | 5.755255  | -0.526103 |
| C | 1.322560  | 4.935760  | 0.560079  |
| C | 6.640435  | -3.118145 | -0.352604 |
| C | 7.865834  | -3.674019 | 0.009903  |
| C | 8.716108  | -4.202707 | -0.964892 |
| C | 8.324157  | -4.190679 | -2.306106 |
| C | 7.094798  | -3.646024 | -2.669861 |
| H | 1.013434  | -1.086021 | -4.022673 |
| H | 0.395284  | -2.669850 | -3.503877 |
| H | 0.998817  | 0.029273  | 0.368769  |
| H | 2.827531  | 3.113769  | 2.241556  |
| H | 2.132516  | -2.850710 | -1.934990 |
| H | 5.774870  | -0.568253 | -0.479640 |
| H | 3.870259  | -0.160467 | 3.487214  |
| H | 6.051132  | 1.236858  | 0.553889  |



|   |          |           |           |
|---|----------|-----------|-----------|
| H | 4.527529 | -2.958919 | -3.041956 |
| H | 7.665832 | 2.736684  | 1.019414  |
| H | 8.701076 | 4.481594  | 2.424411  |
| H | 7.685462 | 5.079545  | 4.616835  |
| H | 5.629855 | 3.911785  | 5.384681  |
| H | 4.598865 | 2.158898  | 3.991146  |
| H | 2.451721 | 2.207331  | -1.134320 |
| H | 1.887883 | 3.651255  | -3.057326 |
| H | 0.971115 | 5.937988  | -2.675685 |
| H | 0.623084 | 6.754365  | -0.353374 |
| H | 1.159143 | 5.289917  | 1.574139  |
| H | 5.972060 | -2.747068 | 0.418050  |
| H | 8.153983 | -3.703695 | 1.056963  |
| H | 9.672064 | -4.631999 | -0.679766 |
| H | 8.974549 | -4.610578 | -3.067854 |
| H | 6.792708 | -3.642540 | -3.714194 |

Sum of electronic and zero-point energy: -3953.50958  
Sum of electronic and thermal free energies: -3953.617792  
Frequency: -634.1374

**Supplementary Table 19. O4R<sup>TS</sup> representative 3**

|    |           |           |           |
|----|-----------|-----------|-----------|
| C  | 3.776901  | 0.916468  | -2.130749 |
| C  | 3.725353  | -1.683489 | -2.374259 |
| P  | 3.320098  | -2.171653 | -0.635783 |
| P  | 3.681359  | 1.147690  | -0.295034 |
| C  | 7.241265  | -3.524196 | 1.437049  |
| C  | 6.055346  | -3.374613 | 2.163505  |
| C  | 4.885445  | -2.979991 | 1.516797  |
| C  | 4.882261  | -2.744935 | 0.129498  |
| C  | 6.070021  | -2.917098 | -0.593128 |
| C  | 7.245225  | -3.296413 | 0.060643  |
| H  | 3.971585  | -2.839817 | 2.087774  |
| H  | 6.097567  | -2.752304 | -1.664914 |
| C  | 0.569770  | -5.904630 | -0.944054 |
| C  | 0.275627  | -4.743906 | -1.663707 |
| C  | 1.121767  | -3.637813 | -1.594325 |
| C  | 2.283733  | -3.681352 | -0.801972 |
| C  | 2.579182  | -4.854172 | -0.088863 |
| C  | 1.725878  | -5.957604 | -0.163906 |
| H  | 0.862831  | -2.734387 | -2.132249 |
| H  | 3.470884  | -4.917357 | 0.524293  |
| C  | 8.181062  | 1.489306  | 0.757611  |
| C  | 7.565519  | 2.428464  | -0.076864 |
| C  | 6.206200  | 2.323547  | -0.361484 |
| C  | 5.445270  | 1.275000  | 0.188271  |
| C  | 6.065136  | 0.348055  | 1.032721  |
| C  | 7.429706  | 0.453879  | 1.312341  |
| H  | 5.734312  | 3.068459  | -0.997123 |
| H  | 5.489357  | -0.456791 | 1.469557  |
| C  | 1.925915  | 5.313827  | 0.690410  |
| C  | 2.583137  | 4.552044  | 1.662766  |
| C  | 3.134720  | 3.320151  | 1.324151  |
| C  | 3.037804  | 2.835222  | 0.007336  |
| C  | 2.376923  | 3.600270  | -0.961479 |
| C  | 1.825986  | 4.839838  | -0.616826 |
| H  | 3.636280  | 2.725866  | 2.082829  |
| H  | 2.271209  | 3.240766  | -1.980266 |
| H  | -0.110820 | -6.749254 | -0.978495 |
| H  | 8.155746  | -3.820992 | 1.942612  |
| H  | 1.493847  | 6.275592  | 0.951970  |
| H  | 9.241824  | 1.571812  | 0.976685  |
| H  | 8.162211  | -3.414364 | -0.509394 |
| H  | 6.043671  | -3.556881 | 3.234274  |
| H  | 1.967308  | -6.857297 | 0.395109  |
| H  | -0.635528 | -4.690142 | -2.250512 |
| H  | 7.896969  | -0.280425 | 1.961473  |
| H  | 8.144012  | 3.244063  | -0.501059 |
| H  | 1.319153  | 5.429156  | -1.371065 |
| H  | 2.663830  | 4.916907  | 2.682505  |
| Rh | 2.334409  | -0.411740 | 0.658573  |
| O  | 1.170819  | -1.975811 | 1.638165  |
| C  | 0.059783  | -2.193454 | 1.100705  |
| N  | -0.435443 | -1.388372 | 0.148159  |
| C  | 0.219983  | -0.184075 | -0.265687 |
| C  | 0.349354  | 0.924382  | 0.634935  |
| H  | -1.342319 | -1.606840 | -0.258545 |
| H  | 3.482351  | -0.522885 | 1.723404  |
| H  | 1.706366  | 0.763598  | 1.623240  |
| H  | 0.691603  | 1.817105  | 0.120841  |
| C  | -2.478939 | 2.124817  | 3.624369  |

|   |           |           |           |
|---|-----------|-----------|-----------|
| C | -1.903808 | 3.048651  | 2.746974  |
| C | -0.931988 | 2.632770  | 1.837142  |
| C | -0.538567 | 1.281149  | 1.774077  |
| C | -1.084055 | 0.377290  | 2.696165  |
| C | -2.055873 | 0.795102  | 3.605356  |
| H | -3.246307 | 2.444268  | 4.322085  |
| H | -2.218409 | 4.088296  | 2.767315  |
| H | -0.489216 | 3.351064  | 1.151780  |
| H | -0.735517 | -0.644878 | 2.730389  |
| H | -2.496778 | 0.072156  | 4.283307  |
| C | 4.521612  | -0.373476 | -2.541515 |
| H | 2.758099  | -1.588351 | -2.872609 |
| H | 4.257059  | -2.513852 | -2.851626 |
| H | 4.764867  | -0.281050 | -3.606626 |
| H | 5.481788  | -0.428335 | -2.015282 |
| H | 2.757157  | 0.902506  | -2.528633 |
| H | 4.296105  | 1.787003  | -2.547429 |
| C | -0.781085 | -3.381055 | 1.544061  |
| C | 0.173704  | 0.057327  | -1.752014 |
| O | 0.701916  | -0.664213 | -2.591880 |
| N | -0.495360 | 1.201112  | -2.172726 |
| C | -1.624761 | 1.750774  | -1.515765 |
| C | -1.958147 | 3.061092  | -1.565674 |
| C | -1.300595 | 4.207686  | -2.193120 |
| C | -2.577325 | 0.730813  | -0.938192 |
| N | -2.184299 | -3.152086 | 1.316281  |
| C | -2.925388 | -3.877265 | 0.413502  |
| C | -4.271763 | -3.277850 | 0.093153  |
| N | -4.394497 | -1.847942 | 0.082566  |
| C | -4.278972 | -1.018039 | 1.146004  |
| C | -4.333851 | 0.475400  | 0.862468  |
| N | -3.315962 | 1.137556  | 0.126497  |
| O | -2.649978 | -0.393452 | -1.453386 |
| C | -5.242192 | 1.206049  | 1.541305  |
| O | -4.183815 | -1.407293 | 2.313917  |
| C | -5.235588 | -4.086182 | -0.393732 |
| O | -2.510123 | -4.894399 | -0.132096 |
| C | -5.396959 | 2.668278  | 1.498349  |
| C | -6.590519 | -3.799875 | -0.859397 |
| C | -5.284077 | 3.408430  | 0.305294  |
| C | -5.375622 | 4.800087  | 0.316965  |
| C | -5.588607 | 5.480151  | 1.519516  |
| C | -5.739923 | 4.755734  | 2.705325  |
| C | -5.656264 | 3.364146  | 2.692934  |
| C | -0.342499 | 4.132905  | -3.224181 |
| C | 0.187607  | 5.291150  | -3.789399 |
| C | -0.210194 | 6.550316  | -3.330477 |
| C | -1.154164 | 6.643742  | -2.303647 |
| C | -1.700599 | 5.487537  | -1.753616 |
| C | -7.282824 | -4.845872 | -1.504163 |
| C | -8.576688 | -4.665688 | -1.985548 |
| C | -9.215601 | -3.434891 | -1.821168 |
| C | -8.550518 | -2.390508 | -1.171220 |
| C | -7.253834 | -2.564709 | -0.696728 |
| H | -0.554295 | -3.567165 | 2.598800  |
| H | -0.466200 | -4.259973 | 0.971569  |
| H | -0.491944 | 1.261626  | -3.186420 |
| H | -2.889833 | 3.327048  | -1.073713 |
| H | -2.689513 | -2.524581 | 1.938878  |
| H | -4.280194 | -1.414146 | -0.830003 |
| H | -3.059070 | 2.032979  | 0.529604  |
| H | -5.854525 | 0.664910  | 2.257673  |

|   |            |           |           |
|---|------------|-----------|-----------|
| H | -4.932245  | -5.128406 | -0.468852 |
| H | -5.159001  | 2.883686  | -0.637154 |
| H | -5.301557  | 5.351638  | -0.616678 |
| H | -5.660597  | 6.563818  | 1.529230  |
| H | -5.930042  | 5.275435  | 3.640033  |
| H | -5.776093  | 2.805285  | 3.617344  |
| H | -0.014183  | 3.175146  | -3.604052 |
| H | 0.913096   | 5.210489  | -4.593731 |
| H | 0.205971   | 7.449762  | -3.774404 |
| H | -1.474047  | 7.617027  | -1.943197 |
| H | -2.449251  | 5.566089  | -0.968280 |
| H | -6.791659  | -5.807655 | -1.628774 |
| H | -9.087347  | -5.485062 | -2.482996 |
| H | -10.226884 | -3.291077 | -2.190841 |
| H | -9.048621  | -1.435203 | -1.030489 |
| H | -6.759377  | -1.749052 | -0.184919 |

Sum of electronic and zero-point energy: -3953.497272  
Sum of electronic and thermal free energies: -3953.604566  
Frequency: -691.1566

**Supplementary Table 20. O4R<sup>TS</sup> representative 4**

|    |           |           |           |
|----|-----------|-----------|-----------|
| C  | -2.678186 | 0.643153  | 2.155603  |
| C  | -2.465234 | -1.926461 | 1.735110  |
| P  | -2.603069 | -1.929846 | -0.111548 |
| P  | -3.132114 | 1.251643  | 0.467322  |
| C  | -7.005758 | -2.816735 | -1.280592 |
| C  | -6.041237 | -2.528608 | -2.251076 |
| C  | -4.730420 | -2.250560 | -1.871224 |
| C  | -4.360583 | -2.268987 | -0.515238 |
| C  | -5.326330 | -2.589008 | 0.447537  |
| C  | -6.645520 | -2.848193 | 0.066337  |
| H  | -3.987528 | -2.016894 | -2.629099 |
| H  | -5.065274 | -2.643911 | 1.498453  |
| C  | -0.469383 | -5.883691 | -1.286796 |
| C  | -1.859298 | -5.862885 | -1.150587 |
| C  | -2.515864 | -4.678891 | -0.809775 |
| C  | -1.782929 | -3.500554 | -0.594502 |
| C  | -0.390325 | -3.534873 | -0.720821 |
| C  | 0.265419  | -4.716281 | -1.066467 |
| H  | -3.596378 | -4.677891 | -0.716298 |
| H  | 0.197237  | -2.649220 | -0.526445 |
| C  | -7.761743 | 1.009079  | 0.287559  |
| C  | -7.013754 | 0.764149  | -0.863926 |
| C  | -5.620175 | 0.820445  | -0.821144 |
| C  | -4.958929 | 1.121900  | 0.375644  |
| C  | -5.720546 | 1.385775  | 1.528519  |
| C  | -7.112114 | 1.323619  | 1.483853  |
| H  | -5.046168 | 0.608866  | -1.715352 |
| H  | -5.236536 | 1.646498  | 2.464516  |
| C  | -2.206459 | 5.780523  | 0.283185  |
| C  | -3.153490 | 5.209212  | -0.572674 |
| C  | -3.455198 | 3.852513  | -0.474591 |
| C  | -2.816253 | 3.055567  | 0.489387  |
| C  | -1.874194 | 3.633882  | 1.354617  |
| C  | -1.570888 | 4.993586  | 1.244383  |
| H  | -4.186926 | 3.413453  | -1.146973 |
| H  | -1.332036 | 3.029884  | 2.071154  |
| H  | 0.037541  | -6.805386 | -1.558527 |
| H  | -8.030977 | -3.021974 | -1.575086 |
| H  | -1.963851 | 6.835939  | 0.197374  |
| H  | -8.846246 | 0.957702  | 0.254940  |
| H  | -7.387748 | -3.078746 | 0.825044  |
| H  | -6.311766 | -2.515884 | -3.303155 |
| H  | 1.347759  | -4.713867 | -1.140308 |
| H  | -2.437707 | -6.767721 | -1.314273 |
| H  | -7.688128 | 1.524160  | 2.382597  |
| H  | -7.509655 | 0.515006  | -1.796883 |
| H  | -0.821341 | 5.425563  | 1.900122  |
| H  | -3.653491 | 5.818974  | -1.319535 |
| Rh | -1.885427 | 0.149986  | -1.109144 |
| O  | -0.639078 | -1.067485 | -2.594060 |
| C  | 0.594195  | -0.976048 | -2.406708 |
| N  | 1.130792  | -0.150503 | -1.508205 |
| C  | 0.354856  | 0.652621  | -0.616944 |
| C  | -0.205341 | 1.854232  | -1.122912 |
| H  | 2.115417  | 0.112608  | -1.617337 |
| H  | -3.203870 | 0.064595  | -1.944277 |
| H  | -1.763449 | 1.573871  | -1.881659 |
| H  | -0.524503 | 2.531562  | -0.339882 |
| C  | 1.380250  | 4.009552  | -4.476562 |

|   |           |           |           |
|---|-----------|-----------|-----------|
| C | 1.316164  | 4.579809  | -3.203586 |
| C | 0.754644  | 3.866329  | -2.144852 |
| C | 0.274718  | 2.561698  | -2.342092 |
| C | 0.309511  | 2.008297  | -3.629458 |
| C | 0.862567  | 2.728628  | -4.687448 |
| H | 1.809450  | 4.567149  | -5.303940 |
| H | 1.688810  | 5.586662  | -3.035550 |
| H | 0.694633  | 4.316491  | -1.158174 |
| H | -0.145154 | 1.040328  | -3.809306 |
| H | 0.876138  | 2.294692  | -5.683441 |
| C | -3.158065 | -0.779013 | 2.491715  |
| H | -1.388019 | -1.898270 | 1.928570  |
| H | -2.814634 | -2.891644 | 2.114875  |
| H | -2.955119 | -0.942953 | 3.557176  |
| H | -4.244484 | -0.836554 | 2.372509  |
| H | -1.589064 | 0.716096  | 2.227226  |
| H | -3.090932 | 1.352910  | 2.881130  |
| C | 1.575166  | -1.893004 | -3.155036 |
| C | 0.736509  | 0.579692  | 0.818519  |
| O | 0.380717  | 1.429949  | 1.641471  |
| N | 1.572466  | -0.452147 | 1.185579  |
| C | 2.111952  | -0.485947 | 2.502884  |
| C | 1.763437  | -1.381313 | 3.447459  |
| C | 0.823283  | -2.505630 | 3.383040  |
| C | 3.107257  | 0.557411  | 2.945146  |
| N | 2.963819  | -1.785373 | -2.708447 |
| C | 3.324554  | -2.075773 | -1.427324 |
| C | 4.687188  | -1.604008 | -0.960957 |
| N | 4.590417  | -0.535295 | -0.024205 |
| C | 3.996261  | 0.634307  | -0.398031 |
| C | 3.629445  | 1.612596  | 0.655623  |
| N | 3.871443  | 1.275604  | 2.015477  |
| O | 3.334671  | 0.755524  | 4.130745  |
| C | 3.192949  | 2.831336  | 0.251002  |
| O | 3.712560  | 0.826592  | -1.596665 |
| C | 5.817569  | -2.257348 | -1.280455 |
| O | 2.556501  | -2.624024 | -0.630009 |
| C | 2.741489  | 3.975517  | 1.037319  |
| C | 7.192010  | -2.017343 | -0.828834 |
| C | 2.774381  | 5.240740  | 0.411236  |
| C | 2.360074  | 6.387686  | 1.081867  |
| C | 1.889657  | 6.293908  | 2.394995  |
| C | 1.827268  | 5.045238  | 3.021597  |
| C | 2.246403  | 3.895084  | 2.356612  |
| C | 0.819217  | -3.448636 | 2.342709  |
| C | -0.060943 | -4.532796 | 2.382464  |
| C | -0.956459 | -4.679005 | 3.442329  |
| C | -0.963802 | -3.742572 | 4.481362  |
| C | -0.068180 | -2.676607 | 4.461114  |
| C | 8.113903  | -3.076770 | -0.932176 |
| C | 9.433699  | -2.922101 | -0.515156 |
| C | 9.864217  | -1.696909 | -0.001098 |
| C | 8.967119  | -0.628453 | 0.086419  |
| C | 7.644201  | -0.783015 | -0.319967 |
| H | 1.530325  | -1.682857 | -4.226280 |
| H | 1.206786  | -2.910332 | -2.998985 |
| H | 1.780096  | -1.210138 | 0.540951  |
| H | 2.229600  | -1.213018 | 4.415651  |
| H | 3.567389  | -1.127930 | -3.188060 |
| H | 4.916938  | -0.650659 | 0.929113  |
| H | 4.392717  | 1.984677  | 2.525827  |
| H | 3.208859  | 2.981576  | -0.825707 |

|   |           |           |           |
|---|-----------|-----------|-----------|
| H | 5.690139  | -3.122073 | -1.930132 |
| H | 3.137268  | 5.313881  | -0.610846 |
| H | 2.405182  | 7.352130  | 0.584345  |
| H | 1.568925  | 7.186753  | 2.924499  |
| H | 1.447882  | 4.964195  | 4.036250  |
| H | 2.140338  | 2.938235  | 2.847486  |
| H | 1.527805  | -3.357642 | 1.525902  |
| H | -0.049283 | -5.260133 | 1.578245  |
| H | -1.637449 | -5.525257 | 3.465369  |
| H | -1.650500 | -3.855701 | 5.315697  |
| H | -0.053170 | -1.962629 | 5.280669  |
| H | 7.785362  | -4.031376 | -1.336003 |
| H | 10.126576 | -3.754482 | -0.596182 |
| H | 10.894020 | -1.571727 | 0.320517  |
| H | 9.302203  | 0.332166  | 0.467183  |
| H | 6.968865  | 0.063090  | -0.272883 |

Sum of electronic and zero-point energy: -3953.506884  
Sum of electronic and thermal free energies: -3953.612281  
Frequency: -538.4606

**Supplementary Table 21. O4R<sup>TS</sup> representative 5**

|    |           |           |           |
|----|-----------|-----------|-----------|
| C  | 5.298189  | 0.368703  | 1.990182  |
| C  | 5.504874  | -2.054833 | 1.030929  |
| P  | 3.934119  | -2.260414 | 0.055274  |
| P  | 3.672499  | 0.864384  | 1.254908  |
| C  | 3.006559  | -6.753467 | 0.742850  |
| C  | 3.416744  | -6.325752 | -0.520501 |
| C  | 3.701517  | -4.977356 | -0.749129 |
| C  | 3.571092  | -4.044263 | 0.289261  |
| C  | 3.148739  | -4.479666 | 1.556983  |
| C  | 2.876287  | -5.827483 | 1.782225  |
| H  | 4.024362  | -4.658457 | -1.734524 |
| H  | 3.011330  | -3.761384 | 2.359117  |
| C  | 4.980248  | -1.744672 | -4.425492 |
| C  | 3.661471  | -1.929476 | -4.003331 |
| C  | 3.380273  | -2.102624 | -2.648809 |
| C  | 4.414347  | -2.090745 | -1.700104 |
| C  | 5.738868  | -1.917451 | -2.132393 |
| C  | 6.016726  | -1.742134 | -3.488830 |
| H  | 2.349192  | -2.196400 | -2.330183 |
| H  | 6.562209  | -1.919191 | -1.426561 |
| C  | 1.665570  | 3.972600  | 4.032053  |
| C  | 2.172303  | 2.778174  | 4.556208  |
| C  | 2.816609  | 1.864230  | 3.724931  |
| C  | 2.981116  | 2.148952  | 2.359190  |
| C  | 2.472339  | 3.346929  | 1.840433  |
| C  | 1.813696  | 4.254207  | 2.674065  |
| H  | 3.164588  | 0.920426  | 4.135123  |
| H  | 2.576310  | 3.578967  | 0.788816  |
| C  | 5.016373  | 2.983057  | -2.639599 |
| C  | 5.423855  | 3.480760  | -1.395822 |
| C  | 5.005372  | 2.858317  | -0.220752 |
| C  | 4.172434  | 1.726178  | -0.280438 |
| C  | 3.776269  | 1.230822  | -1.527662 |
| C  | 4.194086  | 1.857601  | -2.703867 |
| H  | 5.312006  | 3.264497  | 0.739328  |
| H  | 3.152467  | 0.351979  | -1.593162 |
| H  | 5.200877  | -1.602910 | -5.479791 |
| H  | 2.789179  | -7.803300 | 0.918512  |
| H  | 5.347003  | 3.470834  | -3.552240 |
| H  | 1.153237  | 4.675207  | 4.683033  |
| H  | 2.554453  | -6.153894 | 2.767296  |
| H  | 3.521287  | -7.040450 | -1.331930 |
| H  | 7.044590  | -1.605105 | -3.812573 |
| H  | 2.845139  | -1.922175 | -4.719013 |
| H  | 1.419905  | 5.173387  | 2.249476  |
| H  | 2.053493  | 2.553217  | 5.612103  |
| H  | 3.882425  | 1.447386  | -3.659688 |
| H  | 6.068960  | 4.353370  | -1.342659 |
| Rh | 2.236464  | -0.890729 | 1.076492  |
| O  | 0.903147  | -2.610608 | 1.130824  |
| C  | -0.041577 | -2.616894 | 0.297189  |
| N  | -0.317134 | -1.561734 | -0.465934 |
| C  | 0.337462  | -0.304094 | -0.317434 |
| C  | 0.245547  | 0.456272  | 0.885842  |
| H  | -1.038619 | -1.648580 | -1.187691 |
| H  | 2.950867  | -1.339757 | 2.409063  |
| H  | 1.288223  | -0.080270 | 2.097874  |
| H  | 0.663206  | 1.452605  | 0.764007  |
| C  | -2.985651 | 0.587332  | 3.717932  |



|   |           |           |           |
|---|-----------|-----------|-----------|
| C | -2.590099 | 1.721821  | 3.007002  |
| C | -1.513774 | 1.651260  | 2.123820  |
| C | -0.838603 | 0.439008  | 1.916685  |
| C | -1.208206 | -0.681019 | 2.670840  |
| C | -2.278648 | -0.606573 | 3.559075  |
| H | -3.820054 | 0.640495  | 4.411553  |
| H | -3.107583 | 2.666432  | 3.153981  |
| H | -1.190098 | 2.539932  | 1.588752  |
| H | -0.639043 | -1.598226 | 2.583756  |
| H | -2.557073 | -1.482923 | 4.138372  |
| C | 6.089696  | -0.631707 | 1.125504  |
| H | 5.263937  | -2.429595 | 2.032066  |
| H | 6.251598  | -2.739505 | 0.614011  |
| H | 6.234966  | -0.208736 | 0.124639  |
| H | 7.090546  | -0.717917 | 1.565804  |
| H | 5.888166  | 1.282234  | 2.126406  |
| H | 5.096463  | -0.049441 | 2.981795  |
| C | -0.873017 | -3.890681 | 0.124289  |
| C | 0.627073  | 0.325881  | -1.640487 |
| O | 1.091131  | -0.293760 | -2.587317 |
| N | 0.387759  | 1.703500  | -1.750595 |
| C | -0.829134 | 2.304792  | -1.337846 |
| C | -0.931103 | 3.623862  | -1.048453 |
| C | 0.089410  | 4.665293  | -0.932381 |
| C | -2.034174 | 1.397526  | -1.433197 |
| N | -2.315478 | -3.711679 | 0.218369  |
| C | -2.990405 | -3.114348 | -0.812785 |
| C | -4.453304 | -2.824672 | -0.581944 |
| N | -4.798777 | -1.478192 | -0.837913 |
| C | -3.982081 | -0.488756 | -0.359043 |
| C | -4.309134 | 0.933974  | -0.701710 |
| N | -3.182152 | 1.779530  | -0.786265 |
| O | -1.980165 | 0.359539  | -2.085571 |
| C | -5.574884 | 1.404406  | -0.679695 |
| O | -3.030320 | -0.755895 | 0.366364  |
| C | -5.338985 | -3.800122 | -0.303058 |
| O | -2.447147 | -2.829308 | -1.877349 |
| C | -6.040863 | 2.783872  | -0.855935 |
| C | -6.793783 | -3.688645 | -0.133361 |
| C | -5.332594 | 3.757401  | -1.591300 |
| C | -5.835137 | 5.049726  | -1.723678 |
| C | -7.047651 | 5.403146  | -1.124388 |
| C | -7.767425 | 4.446227  | -0.405045 |
| C | -7.273132 | 3.149865  | -0.280750 |
| C | 1.446764  | 4.525309  | -1.293830 |
| C | 2.340445  | 5.580257  | -1.116019 |
| C | 1.912715  | 6.794836  | -0.574543 |
| C | 0.570762  | 6.954654  | -0.217451 |
| C | -0.326065 | 5.906598  | -0.402168 |
| C | -7.429108 | -2.520553 | 0.334573  |
| C | -8.813074 | -2.477853 | 0.486914  |
| C | -9.593877 | -3.593748 | 0.172447  |
| C | -8.977034 | -4.762984 | -0.278250 |
| C | -7.591745 | -4.811872 | -0.420080 |
| H | -0.539159 | -4.599538 | 0.883236  |
| H | -0.648288 | -4.305727 | -0.863593 |
| H | 0.728836  | 2.032889  | -2.650574 |
| H | -1.938280 | 3.997323  | -0.876628 |
| H | -2.713081 | -3.588400 | 1.140699  |
| H | -5.547733 | -1.268223 | -1.485667 |
| H | -3.168968 | 2.581110  | -0.170700 |
| H | -6.351387 | 0.685098  | -0.425402 |

|   |            |           |           |
|---|------------|-----------|-----------|
| H | -4.934811  | -4.809517 | -0.258961 |
| H | -4.408968  | 3.487253  | -2.091012 |
| H | -5.283936  | 5.781871  | -2.307401 |
| H | -7.434339  | 6.412763  | -1.228408 |
| H | -8.716884  | 4.707969  | 0.052974  |
| H | -7.841344  | 2.407835  | 0.275169  |
| H | 1.820026   | 3.592103  | -1.692770 |
| H | 3.378946   | 5.441907  | -1.399834 |
| H | 2.615331   | 7.612099  | -0.440068 |
| H | 0.222927   | 7.896459  | 0.197036  |
| H | -1.369447  | 6.042328  | -0.126682 |
| H | -6.830544  | -1.660146 | 0.614206  |
| H | -9.284955  | -1.572994 | 0.860293  |
| H | -10.673168 | -3.555144 | 0.287964  |
| H | -9.574484  | -5.638793 | -0.514539 |
| H | -7.117007  | -5.726219 | -0.767513 |

Sum of electronic and zero-point energy: -3953.487388  
Sum of electronic and thermal free energies: -3953.597388  
Frequency: -578.561

**Supplementary Table 22. O1R2R<sup>TS</sup> representative 1**

|    |           |           |           |
|----|-----------|-----------|-----------|
| C  | -4.217111 | 0.309705  | 1.897625  |
| C  | -2.216309 | -0.944309 | 2.963380  |
| P  | -1.484059 | -1.801786 | 1.493534  |
| P  | -4.187131 | -0.332883 | 0.165410  |
| C  | -2.806778 | -6.241442 | 1.577198  |
| C  | -2.168610 | -5.697252 | 0.458009  |
| C  | -1.767284 | -4.362190 | 0.463669  |
| C  | -1.983655 | -3.559685 | 1.598646  |
| C  | -2.606359 | -4.117716 | 2.722726  |
| C  | -3.023442 | -5.450996 | 2.706774  |
| H  | -1.302941 | -3.927243 | -0.417556 |
| H  | -2.782195 | -3.522864 | 3.613056  |
| C  | 3.068166  | -1.714833 | 2.439115  |
| C  | 2.464668  | -2.912934 | 2.050858  |
| C  | 1.096275  | -2.957766 | 1.776814  |
| C  | 0.312872  | -1.797724 | 1.883196  |
| C  | 0.929781  | -0.594525 | 2.263867  |
| C  | 2.293183  | -0.560156 | 2.551057  |
| H  | 0.643431  | -3.899600 | 1.487248  |
| H  | 0.350007  | 0.319972  | 2.330028  |
| C  | -7.464124 | -3.593716 | 0.536525  |
| C  | -6.136262 | -3.976311 | 0.347026  |
| C  | -5.142527 | -3.008011 | 0.186656  |
| C  | -5.468710 | -1.647459 | 0.226290  |
| C  | -6.809458 | -1.267720 | 0.417627  |
| C  | -7.799920 | -2.236485 | 0.567136  |
| H  | -4.116924 | -3.314533 | 0.030145  |
| H  | -7.082431 | -0.215916 | 0.433891  |
| C  | -6.042275 | 2.882046  | -2.599480 |
| C  | -5.873381 | 1.563667  | -3.036316 |
| C  | -5.333874 | 0.610384  | -2.177725 |
| C  | -4.953802 | 0.965458  | -0.871168 |
| C  | -5.109451 | 2.289322  | -0.441298 |
| C  | -5.662195 | 3.239493  | -1.306675 |
| H  | -5.203007 | -0.412905 | -2.518980 |
| H  | -4.792783 | 2.599181  | 0.548809  |
| H  | 4.133181  | -1.660642 | 2.645003  |
| H  | -3.132447 | -7.277694 | 1.567777  |
| H  | -6.468551 | 3.625553  | -3.266860 |
| H  | -8.237828 | -4.346983 | 0.655338  |
| H  | -3.517972 | -5.869614 | 3.578561  |
| H  | -1.996482 | -6.308782 | -0.423181 |
| H  | 2.771153  | 0.371029  | 2.828320  |
| H  | 3.057705  | -3.818086 | 1.956338  |
| H  | -8.833899 | -1.932998 | 0.704057  |
| H  | -5.863323 | -5.027293 | 0.321302  |
| H  | -5.794874 | 4.260525  | -0.964195 |
| H  | -6.163518 | 1.280219  | -4.043754 |
| Rh | -2.100493 | -0.851273 | -0.581935 |
| O  | -0.184897 | -1.583700 | -1.373515 |
| C  | 0.784307  | -0.783550 | -1.283304 |
| N  | 0.583953  | 0.528522  | -1.074218 |
| C  | -0.708657 | 1.036695  | -0.721096 |
| C  | -1.713418 | 1.229952  | -1.722712 |
| H  | 1.392472  | 0.983741  | -0.624023 |
| H  | -2.840846 | -2.126471 | -1.112175 |
| H  | -2.507475 | -0.062173 | -1.978673 |
| H  | -2.524949 | 1.869059  | -1.379737 |
| C  | -0.700553 | 2.003777  | -5.827084 |

|   |           |           |           |
|---|-----------|-----------|-----------|
| C | -1.327140 | 2.974746  | -5.042636 |
| C | -1.669905 | 2.689901  | -3.720733 |
| C | -1.377484 | 1.434891  | -3.167894 |
| C | -0.766206 | 0.457877  | -3.963331 |
| C | -0.427463 | 0.745109  | -5.285631 |
| H | -0.438548 | 2.222357  | -6.858324 |
| H | -1.556738 | 3.950757  | -5.460829 |
| H | -2.166214 | 3.442394  | -3.111845 |
| H | -0.593321 | -0.532392 | -3.554923 |
| H | 0.041080  | -0.020259 | -5.898225 |
| C | -3.740478 | -0.727330 | 2.932641  |
| H | -4.269070 | -1.677565 | 2.789881  |
| H | -4.035502 | -0.362094 | 3.923567  |
| H | -1.921534 | -1.497750 | 3.861780  |
| H | -1.720423 | 0.029400  | 3.002015  |
| H | -3.583481 | 1.199367  | 1.929888  |
| H | -5.252475 | 0.598580  | 2.111492  |
| C | 5.001935  | 1.989616  | 1.923274  |
| C | 4.488644  | 3.256483  | 2.633216  |
| N | 5.140830  | 2.132886  | 0.550347  |
| C | 5.057112  | 0.953753  | -0.251604 |
| C | 6.120191  | 0.205381  | -0.627972 |
| C | 3.641196  | 0.535145  | -0.444729 |
| O | 2.774072  | 1.094499  | 0.242335  |
| N | 3.318911  | -0.433197 | -1.363717 |
| C | 2.181618  | -1.299539 | -1.369615 |
| C | 2.353002  | -2.630636 | -1.548440 |
| C | 3.622919  | -3.364153 | -1.578308 |
| N | 3.024790  | 3.300641  | 2.618751  |
| C | 2.338803  | 3.680333  | 1.512143  |
| C | 0.803469  | 3.641546  | 1.582362  |
| N | 0.357654  | 2.864965  | 0.433172  |
| C | -0.671893 | 1.969311  | 0.466161  |
| O | -1.471232 | 1.920923  | 1.402313  |
| C | 0.268289  | 5.096952  | 1.557445  |
| O | 2.893204  | 4.081582  | 0.486746  |
| O | 5.226786  | 0.957402  | 2.531675  |
| C | 7.550887  | 0.388266  | -0.422266 |
| C | -1.235174 | 5.161943  | 1.445957  |
| C | 4.685117  | -3.063917 | -0.700320 |
| C | 5.874739  | -3.788659 | -0.750645 |
| C | 6.028610  | -4.823942 | -1.677677 |
| C | 4.975132  | -5.147161 | -2.537525 |
| C | 3.779598  | -4.432985 | -2.480436 |
| C | 8.136817  | 1.520284  | 0.181756  |
| C | 9.517377  | 1.600560  | 0.329747  |
| C | 10.341684 | 0.559191  | -0.110343 |
| C | 9.777021  | -0.569077 | -0.709726 |
| C | 8.396746  | -0.650714 | -0.866370 |
| C | -2.046164 | 5.026675  | 2.578895  |
| C | -3.435962 | 5.059267  | 2.469485  |
| C | -4.034040 | 5.230112  | 1.218274  |
| C | -3.234622 | 5.359483  | 0.080270  |
| C | -1.844495 | 5.323089  | 0.195643  |
| H | 4.861196  | 4.166614  | 2.155229  |
| H | 4.825766  | 3.224018  | 3.669814  |
| H | 4.607250  | 2.925827  | 0.189215  |
| H | 5.892373  | -0.719084 | -1.152611 |
| H | 4.087909  | -0.794149 | -1.914170 |
| H | 1.446996  | -3.203666 | -1.719855 |
| H | 2.530612  | 2.838333  | 3.369073  |
| H | 0.930421  | 2.966799  | -0.395470 |

|   |           |           |           |
|---|-----------|-----------|-----------|
| H | 4.555078  | -2.293215 | 0.051306  |
| H | 6.676428  | -3.550627 | -0.056831 |
| H | 6.956864  | -5.386342 | -1.718413 |
| H | 5.083669  | -5.960125 | -3.249468 |
| H | 2.961572  | -4.690626 | -3.148336 |
| H | 7.504415  | 2.329177  | 0.522593  |
| H | 9.956197  | 2.479294  | 0.793429  |
| H | 11.418610 | 0.628443  | 0.013500  |
| H | 10.411144 | -1.379954 | -1.055908 |
| H | 7.958819  | -1.529493 | -1.334898 |
| H | -1.584662 | 4.899426  | 3.555727  |
| H | -4.051707 | 4.965778  | 3.359892  |
| H | -5.116971 | 5.276394  | 1.136408  |
| H | -3.690314 | 5.499948  | -0.895663 |
| H | -1.224522 | 5.433969  | -0.690864 |
| H | 0.741390  | 5.603865  | 0.709729  |
| H | 0.614197  | 5.599926  | 2.469443  |
| H | 0.435711  | 3.131027  | 2.477641  |

Sum of electronic and zero-point energy: -3954.700451  
Sum of electronic and thermal free energies: -3954.809088  
Frequency: -789.401

**Supplementary Table 23. O1R2R<sup>TS</sup> representative 2**

|    |           |           |           |
|----|-----------|-----------|-----------|
| C  | 4.923432  | -1.960661 | -2.024701 |
| C  | 2.720851  | -2.538692 | -3.326574 |
| P  | 1.437026  | -1.635168 | -2.336260 |
| P  | 4.258575  | -0.847332 | -0.696795 |
| C  | -2.308444 | -4.382391 | -2.302662 |
| C  | -1.077801 | -4.840031 | -1.821850 |
| C  | 0.043519  | -4.014661 | -1.865168 |
| C  | -0.043913 | -2.723744 | -2.412583 |
| C  | -1.278473 | -2.273527 | -2.902335 |
| C  | -2.404669 | -3.099573 | -2.842508 |
| H  | 0.979879  | -4.360877 | -1.437974 |
| H  | -1.368966 | -1.282099 | -3.332150 |
| C  | 0.346202  | 2.216750  | -4.659435 |
| C  | -0.213609 | 1.948858  | -3.406944 |
| C  | 0.111535  | 0.770624  | -2.737990 |
| C  | 0.991346  | -0.159270 | -3.318013 |
| C  | 1.527290  | 0.105888  | -4.586384 |
| C  | 1.208001  | 1.292226  | -5.250241 |
| H  | -0.316114 | 0.576543  | -1.759416 |
| H  | 2.199590  | -0.595983 | -5.066689 |
| C  | 7.181130  | -0.940965 | 2.880718  |
| C  | 7.099394  | -2.047386 | 2.031941  |
| C  | 6.242402  | -2.024388 | 0.930929  |
| C  | 5.468565  | -0.884816 | 0.667897  |
| C  | 5.549160  | 0.227036  | 1.524294  |
| C  | 6.404874  | 0.192199  | 2.625811  |
| H  | 6.182816  | -2.897205 | 0.287868  |
| H  | 4.936637  | 1.103769  | 1.337109  |
| C  | 4.826698  | 3.243218  | -2.793067 |
| C  | 5.935577  | 2.490431  | -2.391747 |
| C  | 5.756735  | 1.277325  | -1.728831 |
| C  | 4.459455  | 0.806526  | -1.458852 |
| C  | 3.359194  | 1.573451  | -1.851247 |
| C  | 3.537336  | 2.784422  | -2.521980 |
| H  | 6.624947  | 0.707185  | -1.409282 |
| H  | 2.359347  | 1.234332  | -1.630638 |
| H  | 0.111152  | 3.147246  | -5.167851 |
| H  | -3.185547 | -5.020520 | -2.251116 |
| H  | 4.971773  | 4.186785  | -3.311548 |
| H  | 7.847639  | -0.962902 | 3.738150  |
| H  | -3.353330 | -2.741539 | -3.234447 |
| H  | -0.993387 | -5.838196 | -1.400594 |
| H  | 1.639816  | 1.492592  | -6.226643 |
| H  | -0.875576 | 2.663897  | -2.937058 |
| H  | 6.464808  | 1.053977  | 3.284427  |
| H  | 7.702892  | -2.929609 | 2.225428  |
| H  | 2.665502  | 3.357782  | -2.824472 |
| H  | 6.940616  | 2.850204  | -2.592692 |
| Rh | 2.185913  | -1.542786 | -0.047573 |
| O  | 0.240247  | -2.312651 | 0.522098  |
| C  | -0.612660 | -1.416380 | 0.754785  |
| N  | -0.247815 | -0.132779 | 0.933620  |
| C  | 1.152084  | 0.192117  | 1.078895  |
| C  | 1.925437  | -0.527348 | 2.037495  |
| H  | -0.970347 | 0.489319  | 1.317184  |
| H  | 2.762861  | -2.977344 | -0.407005 |
| H  | 2.837467  | -1.911788 | 1.380707  |
| H  | 2.869665  | -0.043731 | 2.275194  |
| C  | 0.085131  | -2.565642 | 5.355732  |

|   |           |           |           |
|---|-----------|-----------|-----------|
| C | 1.097775  | -3.207478 | 4.638898  |
| C | 1.690588  | -2.579792 | 3.543506  |
| C | 1.283207  | -1.299697 | 3.149567  |
| C | 0.265182  | -0.660047 | 3.877037  |
| C | -0.327103 | -1.288159 | 4.972613  |
| H | -0.379011 | -3.058309 | 6.205372  |
| H | 1.424267  | -4.202443 | 4.928049  |
| H | 2.457599  | -3.094530 | 2.972265  |
| H | -0.056878 | 0.337432  | 3.595249  |
| H | -1.112713 | -0.777022 | 5.522197  |
| C | 4.128405  | -1.904150 | -3.345288 |
| H | 4.715020  | -2.446142 | -4.096888 |
| H | 4.077693  | -0.866000 | -3.692536 |
| H | 2.769389  | -3.541105 | -2.888036 |
| H | 2.350659  | -2.660011 | -4.350300 |
| H | 5.958776  | -1.655343 | -2.214772 |
| H | 4.937185  | -2.982441 | -1.632567 |
| C | -2.954999 | 2.855212  | -0.541966 |
| C | -2.669040 | 4.361006  | -0.483064 |
| N | -4.192553 | 2.422285  | -0.169399 |
| C | -4.442750 | 1.053775  | 0.065284  |
| C | -5.630888 | 0.450408  | -0.154489 |
| C | -3.309959 | 0.354904  | 0.770925  |
| O | -2.688618 | 0.900480  | 1.687381  |
| N | -3.034622 | -0.893871 | 0.310865  |
| C | -2.051125 | -1.801871 | 0.802362  |
| C | -2.365793 | -3.082478 | 1.090380  |
| C | -3.698792 | -3.686651 | 1.143264  |
| N | -1.371419 | 4.533376  | 0.135647  |
| C | -0.229082 | 4.444201  | -0.629862 |
| C | 0.992743  | 3.874083  | 0.104914  |
| N | 0.680765  | 2.453383  | 0.313117  |
| C | 1.605708  | 1.586080  | 0.797548  |
| O | 2.754224  | 1.947768  | 1.081231  |
| C | 1.410131  | 4.631191  | 1.407452  |
| O | -0.198877 | 4.725497  | -1.819015 |
| O | -2.070125 | 2.060055  | -0.861537 |
| C | -6.847232 | 1.003129  | -0.756554 |
| C | 0.573973  | 4.381272  | 2.646132  |
| C | -4.848582 | -2.978789 | 1.546938  |
| C | -6.093609 | -3.603019 | 1.569759  |
| C | -6.218077 | -4.942280 | 1.187421  |
| C | -5.082410 | -5.663553 | 0.810396  |
| C | -3.833561 | -5.045520 | 0.802298  |
| C | -6.843092 | 2.060089  | -1.689930 |
| C | -8.037148 | 2.530877  | -2.231428 |
| C | -9.257004 | 1.963576  | -1.852577 |
| C | -9.275692 | 0.905339  | -0.940356 |
| C | -8.082925 | 0.424680  | -0.406505 |
| C | -0.446733 | 5.266080  | 3.028897  |
| C | -1.228263 | 5.018191  | 4.161135  |
| C | -0.992580 | 3.884486  | 4.939760  |
| C | 0.039118  | 3.010505  | 4.587296  |
| C | 0.814002  | 3.256910  | 3.453329  |
| H | -3.437097 | 4.909677  | 0.071171  |
| H | -2.611827 | 4.760461  | -1.499903 |
| H | -4.924459 | 3.090454  | 0.041959  |
| H | -5.725636 | -0.566636 | 0.221170  |
| H | -3.566434 | -1.227428 | -0.484677 |
| H | -1.522648 | -3.747223 | 1.253206  |
| H | -1.298907 | 4.205553  | 1.093288  |
| H | -0.215721 | 2.118012  | -0.027688 |

|   |            |           |           |
|---|------------|-----------|-----------|
| H | -4.753244  | -1.953542 | 1.886791  |
| H | -6.967415  | -3.049013 | 1.902037  |
| H | -7.190634  | -5.425459 | 1.202106  |
| H | -5.168969  | -6.710140 | 0.533069  |
| H | -2.950022  | -5.608917 | 0.515481  |
| H | -5.901775  | 2.483629  | -2.023729 |
| H | -8.015570  | 3.337312  | -2.958846 |
| H | -10.185694 | 2.336528  | -2.274275 |
| H | -10.218859 | 0.451649  | -0.650399 |
| H | -8.101306  | -0.403472 | 0.298017  |
| H | -0.626500  | 6.159967  | 2.436139  |
| H | -2.009599  | 5.719900  | 4.440433  |
| H | -1.594406  | 3.693225  | 5.823683  |
| H | 0.250895   | 2.140535  | 5.203230  |
| H | 1.634010   | 2.591344  | 3.202673  |
| H | 1.418955   | 5.700015  | 1.163159  |
| H | 2.441311   | 4.332912  | 1.606563  |
| H | 1.829007   | 3.956966  | -0.593673 |

Sum of electronic and zero-point energy: -3954.706203  
Sum of electronic and thermal free energies: -3954.813851  
Frequency: -518.4731



**Supplementary Table 24. O1R2R<sup>TS</sup> representative 3**

|    |           |           |           |
|----|-----------|-----------|-----------|
| C  | -4.873373 | -1.889190 | 1.761058  |
| C  | -2.875401 | -1.605072 | 3.420813  |
| P  | -1.597345 | -0.828286 | 2.314521  |
| P  | -4.135922 | -1.385392 | 0.132884  |
| C  | 2.505811  | -2.093200 | 4.070526  |
| C  | 2.318856  | -0.798538 | 3.588054  |
| C  | 1.079217  | -0.410473 | 3.076653  |
| C  | 0.007197  | -1.314810 | 3.053117  |
| C  | 0.211733  | -2.626941 | 3.509029  |
| C  | 1.451326  | -3.009768 | 4.019978  |
| H  | 0.957747  | 0.598675  | 2.701416  |
| H  | -0.588403 | -3.358683 | 3.456591  |
| C  | -2.301175 | 3.598477  | 3.491535  |
| C  | -1.677640 | 2.728551  | 4.391860  |
| C  | -1.433630 | 1.405216  | 4.029314  |
| C  | -1.793459 | 0.942057  | 2.749966  |
| C  | -2.411948 | 1.821880  | 1.853905  |
| C  | -2.677120 | 3.141389  | 2.228869  |
| H  | -0.949783 | 0.735798  | 4.734609  |
| H  | -2.682191 | 1.478212  | 0.864924  |
| C  | -6.487563 | -4.108281 | -2.797526 |
| C  | -6.864478 | -2.774072 | -2.640059 |
| C  | -6.156160 | -1.940210 | -1.772018 |
| C  | -5.054312 | -2.437382 | -1.059582 |
| C  | -4.678816 | -3.781669 | -1.223841 |
| C  | -5.396532 | -4.611696 | -2.083639 |
| H  | -6.461568 | -0.905242 | -1.658708 |
| H  | -3.820623 | -4.173942 | -0.687324 |
| C  | -5.563333 | 2.939233  | -0.743467 |
| C  | -4.651896 | 2.296624  | -1.585044 |
| C  | -4.245670 | 0.992105  | -1.306937 |
| C  | -4.741018 | 0.313728  | -0.183130 |
| C  | -5.665274 | 0.962885  | 0.651844  |
| C  | -6.068724 | 2.269664  | 0.373043  |
| H  | -3.521063 | 0.525719  | -1.961430 |
| H  | -6.077082 | 0.466966  | 1.523215  |
| H  | -2.491189 | 4.630676  | 3.771156  |
| H  | 3.471520  | -2.397309 | 4.462484  |
| H  | -5.881399 | 3.955697  | -0.957092 |
| H  | -7.039064 | -4.753539 | -3.475195 |
| H  | 1.596207  | -4.025692 | 4.376322  |
| H  | 3.135042  | -0.081921 | 3.600079  |
| H  | -3.164024 | 3.814570  | 1.533087  |
| H  | -1.384410 | 3.079886  | 5.377060  |
| H  | -5.098725 | -5.649642 | -2.202220 |
| H  | -7.710436 | -2.376746 | -3.193462 |
| H  | -6.779201 | 2.762575  | 1.030103  |
| H  | -4.240690 | 2.805636  | -2.450962 |
| Rh | -1.871830 | -1.755649 | 0.114710  |
| O  | 0.146069  | -2.535124 | 0.332065  |
| C  | 1.068842  | -1.819288 | -0.136367 |
| N  | 0.799779  | -0.806034 | -0.970080 |
| C  | -0.532202 | -0.479922 | -1.383113 |
| C  | -1.226299 | -1.393724 | -2.206298 |
| H  | 1.562507  | -0.312252 | -1.437292 |
| H  | -2.406469 | -3.040736 | 0.848879  |
| H  | -2.096506 | -2.565824 | -1.264318 |
| H  | -2.121643 | -0.993635 | -2.675752 |
| C  | 0.815982  | -4.298060 | -4.641757 |

|   |           |           |           |
|---|-----------|-----------|-----------|
| C | 1.286612  | -2.988200 | -4.532663 |
| C | 0.630349  | -2.069925 | -3.712812 |
| C | -0.510784 | -2.455380 | -2.988801 |
| C | -0.981790 | -3.768022 | -3.112337 |
| C | -0.323430 | -4.683936 | -3.932048 |
| H | 1.330962  | -5.012792 | -5.277382 |
| H | 2.166663  | -2.675036 | -5.087401 |
| H | 0.999174  | -1.050426 | -3.649707 |
| H | -1.862254 | -4.075302 | -2.554640 |
| H | -0.699269 | -5.699940 | -4.013228 |
| C | -4.318489 | -1.227986 | 3.039095  |
| H | -4.970052 | -1.538374 | 3.865043  |
| H | -4.407112 | -0.137068 | 2.979441  |
| H | -2.744591 | -2.691448 | 3.377510  |
| H | -2.669864 | -1.280356 | 4.446669  |
| H | -5.955022 | -1.726401 | 1.692115  |
| H | -4.725062 | -2.973871 | 1.803173  |
| C | 3.052297  | 1.813551  | -2.429115 |
| C | 2.445566  | 3.040079  | -3.115114 |
| N | 4.039842  | 2.044915  | -1.521705 |
| C | 4.492516  | 1.021741  | -0.650112 |
| C | 5.781341  | 0.825746  | -0.306310 |
| C | 3.376450  | 0.255137  | 0.011618  |
| O | 2.455356  | 0.837870  | 0.578330  |
| N | 3.456436  | -1.105619 | -0.129108 |
| C | 2.477774  | -2.057283 | 0.262708  |
| C | 2.795300  | -3.220901 | 0.873201  |
| C | 4.093588  | -3.657469 | 1.381347  |
| N | 1.145015  | 3.269794  | -2.495514 |
| C | 1.129980  | 3.606212  | -1.163580 |
| C | -0.148383 | 3.199779  | -0.407703 |
| N | -0.237692 | 1.730813  | -0.454509 |
| C | -0.801302 | 0.993844  | -1.450517 |
| O | -1.455289 | 1.487129  | -2.379875 |
| C | -1.421039 | 3.933537  | -0.875400 |
| O | 2.099071  | 4.109813  | -0.605922 |
| O | 2.591563  | 0.684862  | -2.636804 |
| C | 6.996656  | 1.509725  | -0.754471 |
| C | -1.622979 | 5.306665  | -0.257545 |
| C | 4.338738  | -5.040390 | 1.485227  |
| C | 5.553616  | -5.517484 | 1.972054  |
| C | 6.540011  | -4.620797 | 2.389998  |
| C | 6.300261  | -3.244438 | 2.323249  |
| C | 5.093806  | -2.765004 | 1.821059  |
| C | 7.080020  | 2.275376  | -1.935418 |
| C | 8.277771  | 2.884465  | -2.299989 |
| C | 9.414354  | 2.750115  | -1.497306 |
| C | 9.350431  | 1.986978  | -0.329253 |
| C | 8.156726  | 1.367989  | 0.032203  |
| C | -2.918686 | 5.847936  | -0.270113 |
| C | -3.184690 | 7.097733  | 0.286623  |
| C | -2.151020 | 7.836869  | 0.868618  |
| C | -0.858339 | 7.314156  | 0.879441  |
| C | -0.592943 | 6.060231  | 0.319731  |
| H | 2.303264  | 2.817387  | -4.173853 |
| H | 3.063540  | 3.934357  | -3.010606 |
| H | 4.225776  | 3.009992  | -1.266809 |
| H | 5.947290  | 0.069719  | 0.460495  |
| H | 4.258812  | -1.459778 | -0.636477 |
| H | 1.976336  | -3.926862 | 0.973301  |
| H | 0.368452  | 2.716897  | -2.847222 |
| H | 0.424663  | 1.253304  | 0.151099  |

|   |           |           |           |
|---|-----------|-----------|-----------|
| H | 3.569020  | -5.740591 | 1.170546  |
| H | 5.728266  | -6.587627 | 2.033236  |
| H | 7.484978  | -4.991132 | 2.776624  |
| H | 7.054700  | -2.544490 | 2.671720  |
| H | 4.898473  | -1.699085 | 1.811841  |
| H | 6.214742  | 2.369253  | -2.580630 |
| H | 8.326784  | 3.463581  | -3.217704 |
| H | 10.344689 | 3.231249  | -1.784596 |
| H | 10.230648 | 1.870422  | 0.296184  |
| H | 8.113946  | 0.770850  | 0.940173  |
| H | -3.728052 | 5.273289  | -0.715814 |
| H | -4.196617 | 7.493885  | 0.269274  |
| H | -2.352908 | 8.810785  | 1.305528  |
| H | -0.045476 | 7.882129  | 1.323903  |
| H | 0.425107  | 5.683629  | 0.338714  |
| H | -2.280122 | 3.304538  | -0.634151 |
| H | -1.427664 | 4.010444  | -1.966773 |
| H | 0.033353  | 3.440517  | 0.641185  |

Sum of electronic and zero-point energy: -3954.700878  
Sum of electronic and thermal free energies: -3954.809186  
Frequency: -514.8898

**Supplementary Table 25. O1R2R<sup>TS</sup> representative 4**

|    |           |           |           |
|----|-----------|-----------|-----------|
| C  | 4.248487  | -0.198249 | 0.810126  |
| C  | 3.019099  | 1.423318  | 2.425513  |
| P  | 1.847186  | 2.289867  | 1.275540  |
| P  | 3.578201  | 0.263271  | -0.860199 |
| C  | 3.607274  | 6.505892  | 0.396652  |
| C  | 2.597256  | 5.968294  | -0.405177 |
| C  | 2.098291  | 4.692066  | -0.141244 |
| C  | 2.593071  | 3.939513  | 0.938284  |
| C  | 3.596479  | 4.496144  | 1.746043  |
| C  | 4.105473  | 5.767296  | 1.470609  |
| H  | 1.320842  | 4.274820  | -0.775009 |
| H  | 3.989574  | 3.950305  | 2.597414  |
| C  | -1.695886 | 3.283937  | 4.142118  |
| C  | -1.128677 | 4.292049  | 3.358887  |
| C  | -0.073629 | 4.000999  | 2.492649  |
| C  | 0.429489  | 2.692669  | 2.395726  |
| C  | -0.157273 | 1.678628  | 3.173077  |
| C  | -1.207288 | 1.977807  | 4.045356  |
| H  | 0.360783  | 4.800676  | 1.903632  |
| H  | 0.187581  | 0.653050  | 3.093931  |
| C  | 7.018671  | 2.911500  | -2.521978 |
| C  | 5.758923  | 3.475357  | -2.325288 |
| C  | 4.705703  | 2.694035  | -1.842514 |
| C  | 4.905225  | 1.340154  | -1.549465 |
| C  | 6.179677  | 0.777575  | -1.753380 |
| C  | 7.227189  | 1.559062  | -2.235682 |
| H  | 3.729029  | 3.138546  | -1.694761 |
| H  | 6.352341  | -0.276559 | -1.554536 |
| C  | 3.907206  | -3.534318 | -3.513708 |
| C  | 3.974815  | -3.666141 | -2.127571 |
| C  | 3.883127  | -2.538118 | -1.305102 |
| C  | 3.729064  | -1.264555 | -1.872035 |
| C  | 3.657470  | -1.140835 | -3.271683 |
| C  | 3.747262  | -2.267782 | -4.085165 |
| H  | 3.935686  | -2.673936 | -0.230449 |
| H  | 3.541078  | -0.160659 | -3.725980 |
| H  | -2.509875 | 3.512873  | 4.824538  |
| H  | 4.001176  | 7.496340  | 0.187143  |
| H  | 3.980239  | -4.412169 | -4.149412 |
| H  | 7.835668  | 3.518911  | -2.901021 |
| H  | 4.888508  | 6.179901  | 2.100399  |
| H  | 2.199143  | 6.540039  | -1.238843 |
| H  | -1.657400 | 1.182751  | 4.632869  |
| H  | -1.499550 | 5.310974  | 3.426346  |
| H  | 8.204008  | 1.111228  | -2.394500 |
| H  | 5.587524  | 4.524756  | -2.546795 |
| H  | 3.696950  | -2.157654 | -5.164613 |
| H  | 4.102195  | -4.642643 | -1.670677 |
| Rh | 1.410108  | 1.019802  | -0.740363 |
| O  | -0.643009 | 1.804814  | -0.747676 |
| C  | -1.449286 | 1.132934  | -0.043180 |
| N  | -1.094710 | -0.061907 | 0.451435  |
| C  | 0.106079  | -0.726023 | 0.033510  |
| C  | 0.306760  | -0.953972 | -1.364648 |
| H  | -1.704745 | -0.555364 | 1.112183  |
| H  | 1.943264  | 2.219214  | -1.612092 |
| H  | 1.166776  | 0.242380  | -2.153575 |
| H  | 1.090833  | -1.677464 | -1.585399 |
| C  | -2.884442 | -1.209411 | -4.264718 |

|   |           |           |           |
|---|-----------|-----------|-----------|
| C | -1.978248 | -0.152936 | -4.349724 |
| C | -0.954714 | -0.026165 | -3.408304 |
| C | -0.824278 | -0.952032 | -2.366833 |
| C | -1.748266 | -2.007864 | -2.281042 |
| C | -2.764480 | -2.136841 | -3.227992 |
| H | -3.678692 | -1.310915 | -4.998779 |
| H | -2.061817 | 0.576318  | -5.150899 |
| H | -0.258869 | 0.804128  | -3.475090 |
| H | -1.672464 | -2.741609 | -1.481303 |
| H | -3.465685 | -2.962131 | -3.153311 |
| C | 4.354489  | 0.972887  | 1.805630  |
| H | 4.876358  | 1.818411  | 1.341955  |
| H | 4.997553  | 0.638508  | 2.629052  |
| H | 3.201799  | 2.071040  | 3.289792  |
| H | 2.470651  | 0.549680  | 2.793628  |
| H | 3.611590  | -0.984338 | 1.229506  |
| H | 5.242308  | -0.631532 | 0.649200  |
| C | -3.286661 | -2.563400 | 2.074556  |
| C | -3.197779 | -4.012842 | 2.588979  |
| N | -4.436902 | -2.154894 | 1.486483  |
| C | -4.623951 | -0.826443 | 1.026796  |
| C | -5.408111 | -0.518230 | -0.027471 |
| C | -4.110826 | 0.220644  | 1.987568  |
| O | -4.349362 | 0.117109  | 3.182078  |
| N | -3.402907 | 1.310462  | 1.514784  |
| C | -2.822668 | 1.647748  | 0.252009  |
| C | -3.365040 | 2.523087  | -0.626217 |
| C | -4.636882 | 3.243390  | -0.627254 |
| N | -1.792635 | -4.358798 | 2.745189  |
| C | -1.037552 | -4.369073 | 1.600267  |
| C | 0.469051  | -4.046724 | 1.731309  |
| N | 0.702422  | -2.990893 | 0.734715  |
| C | 0.622218  | -1.664735 | 1.103335  |
| O | 0.877989  | -1.296769 | 2.249780  |
| C | 1.320491  | -5.299998 | 1.489044  |
| O | -1.532373 | -4.562781 | 0.493107  |
| O | -2.309637 | -1.822406 | 2.199233  |
| C | -6.154754 | -1.411243 | -0.922956 |
| C | 2.825580  | -5.124323 | 1.604340  |
| C | -5.547553 | 3.291902  | 0.451451  |
| C | -6.733413 | 4.014245  | 0.343552  |
| C | -7.041928 | 4.703309  | -0.833070 |
| C | -6.150479 | 4.671640  | -1.907795 |
| C | -4.962919 | 3.953671  | -1.802596 |
| C | -5.783430 | -2.741991 | -1.207942 |
| C | -6.558099 | -3.530526 | -2.057942 |
| C | -7.715775 | -3.012882 | -2.643535 |
| C | -8.085946 | -1.690306 | -2.387680 |
| C | -7.310500 | -0.898374 | -1.544900 |
| C | 3.421755  | -4.119117 | 2.378612  |
| C | 4.812645  | -4.047415 | 2.506506  |
| C | 5.631449  | -4.977249 | 1.864799  |
| C | 5.048803  | -5.981969 | 1.088646  |
| C | 3.660851  | -6.049548 | 0.959657  |
| H | -3.670138 | -4.708239 | 1.891416  |
| H | -3.701219 | -4.098694 | 3.557077  |
| H | -5.190021 | -2.818162 | 1.342819  |
| H | -5.585008 | 0.541717  | -0.188727 |
| H | -3.096392 | 1.891856  | 2.293482  |
| H | -2.745065 | 2.712856  | -1.499177 |
| H | -1.348105 | -3.932594 | 3.549347  |
| H | 0.274092  | -3.226041 | -0.154017 |

|   |           |           |           |
|---|-----------|-----------|-----------|
| H | -5.322167 | 2.776427  | 1.376392  |
| H | -7.418929 | 4.044194  | 1.185723  |
| H | -7.968421 | 5.265329  | -0.908689 |
| H | -6.378711 | 5.208508  | -2.823936 |
| H | -4.269899 | 3.933932  | -2.639982 |
| H | -4.861114 | -3.147790 | -0.805525 |
| H | -6.251729 | -4.551431 | -2.269193 |
| H | -8.318834 | -3.631988 | -3.301300 |
| H | -8.978243 | -1.275065 | -2.847310 |
| H | -7.602830 | 0.130420  | -1.350594 |
| H | 2.810407  | -3.377824 | 2.885380  |
| H | 5.254183  | -3.265966 | 3.119760  |
| H | 6.711192  | -4.924035 | 1.971436  |
| H | 5.673535  | -6.715804 | 0.586687  |
| H | 3.215758  | -6.841033 | 0.360144  |
| H | 1.067450  | -5.703721 | 0.501040  |
| H | 0.991434  | -6.061257 | 2.212060  |
| H | 0.680886  | -3.609890 | 2.708059  |

Sum of electronic and zero-point energy: -3954.700668  
Sum of electronic and thermal free energies: -3954.816455  
Frequency: -724.5988

**Supplementary Table 26. O1R2R<sup>TS</sup> representative 5**

|    |           |           |           |
|----|-----------|-----------|-----------|
| C  | 4.023086  | 3.715705  | -0.547896 |
| C  | 4.907509  | 1.453594  | -1.444043 |
| P  | 3.607925  | 0.272264  | -0.841067 |
| P  | 2.379182  | 3.330210  | 0.229961  |
| C  | 6.236463  | -3.114432 | 0.943796  |
| C  | 5.629582  | -2.181942 | 1.789072  |
| C  | 4.828703  | -1.169408 | 1.259109  |
| C  | 4.626592  | -1.081501 | -0.126933 |
| C  | 5.242955  | -2.019593 | -0.971719 |
| C  | 6.042738  | -3.030607 | -0.437395 |
| H  | 4.342673  | -0.463832 | 1.922666  |
| H  | 5.087372  | -1.973991 | -2.045216 |
| C  | 1.436271  | -1.582386 | -4.490862 |
| C  | 1.491734  | -2.262337 | -3.270621 |
| C  | 2.207902  | -1.721045 | -2.205838 |
| C  | 2.861762  | -0.483903 | -2.335028 |
| C  | 2.817485  | 0.179281  | -3.569366 |
| C  | 2.111933  | -0.370750 | -4.641103 |
| H  | 2.274130  | -2.275006 | -1.276902 |
| H  | 3.333572  | 1.123546  | -3.712010 |
| C  | 2.411297  | 6.364777  | 3.743893  |
| C  | 2.614452  | 6.798414  | 2.430665  |
| C  | 2.593115  | 5.881784  | 1.381530  |
| C  | 2.364401  | 4.514127  | 1.631035  |
| C  | 2.167464  | 4.089779  | 2.952620  |
| C  | 2.189177  | 5.012118  | 4.001340  |
| H  | 2.738306  | 6.240243  | 0.366467  |
| H  | 2.012672  | 3.039105  | 3.167969  |
| C  | -0.778441 | 4.753038  | -2.870947 |
| C  | -0.697149 | 5.400623  | -1.635998 |
| C  | 0.241016  | 4.993303  | -0.685121 |
| C  | 1.116697  | 3.930861  | -0.965066 |
| C  | 1.001747  | 3.262005  | -2.196187 |
| C  | 0.068460  | 3.677102  | -3.144554 |
| H  | 0.287938  | 5.507983  | 0.268037  |
| H  | 1.593360  | 2.378216  | -2.402143 |
| H  | 0.885780  | -2.005549 | -5.326913 |
| H  | 6.858031  | -3.902540 | 1.359648  |
| H  | -1.503499 | 5.080512  | -3.610782 |
| H  | 2.429459  | 7.079862  | 4.561159  |
| H  | 6.512175  | -3.751601 | -1.100450 |
| H  | 5.772109  | -2.245822 | 2.863922  |
| H  | 2.093297  | 0.149927  | -5.594479 |
| H  | 0.972760  | -3.209535 | -3.145547 |
| H  | 2.036136  | 4.667236  | 5.019675  |
| H  | 2.790208  | 7.849843  | 2.222921  |
| H  | -0.003527 | 3.141637  | -4.086459 |
| H  | -1.361432 | 6.230190  | -1.410350 |
| Rh | 2.026187  | 1.134884  | 0.722998  |
| O  | 1.863933  | -1.007889 | 1.295271  |
| C  | 0.891303  | -1.629061 | 0.789736  |
| N  | -0.065252 | -0.960961 | 0.120085  |
| C  | -0.065272 | 0.448179  | -0.050668 |
| C  | -0.241295 | 1.311408  | 1.117819  |
| H  | -0.754397 | -1.508825 | -0.380967 |
| H  | 3.158183  | 1.402693  | 1.777944  |
| H  | 1.081811  | 1.618573  | 1.995850  |
| H  | -0.503036 | 2.331437  | 0.838989  |
| C  | -2.765420 | -0.350510 | 4.172362  |

|   |           |           |           |
|---|-----------|-----------|-----------|
| C | -1.419601 | -0.717756 | 4.140563  |
| C | -0.554390 | -0.145837 | 3.206207  |
| C | -1.034492 | 0.790285  | 2.285062  |
| C | -2.383256 | 1.177710  | 2.337347  |
| C | -3.243610 | 0.605959  | 3.273710  |
| H | -3.435546 | -0.802592 | 4.898245  |
| H | -1.041352 | -1.465869 | 4.829561  |
| H | 0.489862  | -0.437165 | 3.183104  |
| H | -2.768532 | 1.931836  | 1.656010  |
| H | -4.284912 | 0.912238  | 3.290305  |
| C | 4.470317  | 2.892089  | -1.764741 |
| H | 5.338070  | 3.405337  | -2.197379 |
| H | 3.699524  | 2.915820  | -2.540743 |
| H | 5.659101  | 1.472752  | -0.645962 |
| H | 5.386379  | 0.995484  | -2.316916 |
| H | 3.986707  | 4.775330  | -0.821536 |
| H | 4.752455  | 3.618044  | 0.265262  |
| C | -2.317106 | -3.100051 | -2.063903 |
| C | -2.667594 | -2.344881 | -3.360262 |
| N | -2.885850 | -2.569694 | -0.933610 |
| C | -2.897075 | -3.046262 | 0.416805  |
| C | -3.995388 | -2.890143 | 1.193335  |
| C | -1.612655 | -3.368461 | 1.146185  |
| O | -1.548271 | -3.330987 | 2.367858  |
| N | -0.484159 | -3.582400 | 0.374225  |
| C | 0.773550  | -3.102625 | 0.820979  |
| C | 1.873544  | -3.840426 | 1.097584  |
| C | 2.027339  | -5.287852 | 1.125748  |
| N | -2.386500 | -0.917378 | -3.304495 |
| C | -3.273778 | -0.043220 | -2.759447 |
| C | -2.730912 | 1.392421  | -2.552018 |
| N | -1.868909 | 1.362251  | -1.367978 |
| C | -0.637257 | 0.781934  | -1.393962 |
| O | -0.107970 | 0.417917  | -2.448947 |
| C | -3.854547 | 2.445014  | -2.394869 |
| O | -4.397002 | -0.392430 | -2.387071 |
| O | -1.559677 | -4.070146 | -2.087223 |
| C | -5.323862 | -2.371331 | 0.875830  |
| C | -4.352001 | 2.672899  | -0.976690 |
| C | 0.947229  | -6.180885 | 1.282992  |
| C | 1.172381  | -7.553467 | 1.308199  |
| C | 2.468935  | -8.061175 | 1.169816  |
| C | 3.548774  | -7.186511 | 1.023341  |
| C | 3.331314  | -5.811513 | 1.012166  |
| C | -6.047957 | -1.775979 | 1.930902  |
| C | -7.303535 | -1.216811 | 1.714038  |
| C | -7.871627 | -1.246926 | 0.436088  |
| C | -7.181073 | -1.857148 | -0.613676 |
| C | -5.924365 | -2.418847 | -0.398355 |
| C | -5.260551 | 1.801550  | -0.356067 |
| C | -5.714713 | 2.059567  | 0.939101  |
| C | -5.267409 | 3.183906  | 1.637228  |
| C | -4.347026 | 4.046482  | 1.037193  |
| C | -3.891939 | 3.787745  | -0.257588 |
| H | -3.731393 | -2.476840 | -3.583002 |
| H | -2.077581 | -2.799306 | -4.156850 |
| H | -3.581604 | -1.846030 | -1.117742 |
| H | -3.811408 | -3.096246 | 2.243997  |
| H | -0.603254 | -3.956422 | -0.571153 |
| H | 2.777607  | -3.264052 | 1.285602  |
| H | -1.420880 | -0.604691 | -3.405725 |
| H | -2.345100 | 1.453808  | -0.478275 |



|   |           |           |           |
|---|-----------|-----------|-----------|
| H | -0.054380 | -5.790321 | 1.415586  |
| H | 0.335194  | -8.232564 | 1.441230  |
| H | 2.636566  | -9.134373 | 1.186012  |
| H | 4.557745  | -7.576936 | 0.925668  |
| H | 4.169278  | -5.127088 | 0.903785  |
| H | -5.603930 | -1.745576 | 2.922316  |
| H | -7.843681 | -0.763298 | 2.540593  |
| H | -8.851459 | -0.811061 | 0.263941  |
| H | -7.623371 | -1.901794 | -1.604303 |
| H | -5.425466 | -2.919289 | -1.219974 |
| H | -5.608541 | 0.924465  | -0.889791 |
| H | -6.421896 | 1.374761  | 1.396412  |
| H | -5.628989 | 3.385092  | 2.641870  |
| H | -3.987658 | 4.921039  | 1.572784  |
| H | -3.176972 | 4.461757  | -0.722209 |
| H | -4.684619 | 2.143413  | -3.040569 |
| H | -3.464671 | 3.391521  | -2.781342 |
| H | -2.095410 | 1.654740  | -3.401714 |

Sum of electronic and zero-point energy: -3954.701753  
Sum of electronic and thermal free energies: -3954.80921  
Frequency: -720.8475

**Supplementary Table 27. O1R2S<sup>TS</sup> representative 1**

|    |           |           |           |
|----|-----------|-----------|-----------|
| C  | -5.235182 | -1.465943 | -1.008636 |
| P  | -4.160598 | -0.735168 | 0.314113  |
| P  | -1.871262 | -1.528450 | -2.091163 |
| C  | -6.114148 | -1.440966 | 4.440073  |
| C  | -6.344271 | -2.350275 | 3.404819  |
| C  | -5.790278 | -2.131223 | 2.142891  |
| C  | -5.010000 | -0.990749 | 1.907820  |
| C  | -4.779877 | -0.076063 | 2.950945  |
| C  | -5.331760 | -0.306380 | 4.211403  |
| H  | -5.966711 | -2.854443 | 1.352249  |
| H  | -4.173494 | 0.809656  | 2.777029  |
| C  | -4.844171 | 3.699715  | -0.811282 |
| C  | -5.793019 | 3.007807  | -0.054943 |
| C  | -5.554635 | 1.688197  | 0.324699  |
| C  | -4.353612 | 1.051625  | -0.037314 |
| C  | -3.405350 | 1.752911  | -0.791778 |
| C  | -3.656842 | 3.069252  | -1.182752 |
| H  | -6.300052 | 1.159301  | 0.910418  |
| H  | -2.467278 | 1.284771  | -1.063160 |
| C  | 0.643007  | -5.163321 | -3.574067 |
| C  | -0.297862 | -5.309705 | -2.550522 |
| C  | -1.034916 | -4.210472 | -2.112440 |
| C  | -0.850760 | -2.946200 | -2.698625 |
| C  | 0.086512  | -2.812064 | -3.734003 |
| C  | 0.831760  | -3.913210 | -4.162694 |
| H  | -1.734849 | -4.331981 | -1.292888 |
| H  | 0.247951  | -1.851928 | -4.209870 |
| C  | 0.127766  | 2.012918  | -4.314945 |
| C  | 0.825645  | 1.265951  | -3.361344 |
| C  | 0.184108  | 0.234687  | -2.680443 |
| C  | -1.155908 | -0.085350 | -2.961419 |
| C  | -1.857010 | 0.683702  | -3.901013 |
| C  | -1.215579 | 1.730382  | -4.570455 |
| H  | 0.746617  | -0.334497 | -1.948659 |
| H  | -2.897265 | 0.473236  | -4.126990 |
| H  | -5.025708 | 4.728096  | -1.110134 |
| H  | -6.543993 | -1.616347 | 5.421962  |
| H  | 0.622401  | 2.823785  | -4.841676 |
| H  | 1.223797  | -6.017607 | -3.910005 |
| H  | -5.151323 | 0.403509  | 5.013382  |
| H  | -6.954940 | -3.231557 | 3.578554  |
| H  | -2.926266 | 3.611899  | -1.769439 |
| H  | -6.719474 | 3.492606  | 0.239124  |
| H  | 1.560184  | -3.788649 | -4.958605 |
| H  | -0.453259 | -6.278747 | -2.084384 |
| H  | -1.766858 | 2.315802  | -5.300988 |
| H  | 1.859458  | 1.492225  | -3.120671 |
| Rh | -2.084819 | -1.677662 | 0.309267  |
| O  | -0.080085 | -2.576816 | 0.167286  |
| C  | 0.865215  | -1.794189 | 0.456784  |
| N  | 0.638537  | -0.649625 | 1.112861  |
| C  | -0.680774 | -0.229255 | 1.476165  |
| C  | -1.379769 | -0.974478 | 2.451853  |
| H  | 1.416182  | -0.132324 | 1.525287  |
| H  | -2.893335 | -2.974803 | -0.115222 |
| H  | -2.477648 | -2.274267 | 1.745314  |
| H  | -2.240142 | -0.469034 | 2.880792  |
| C  | 0.676119  | -3.576868 | 5.199460  |
| C  | 1.109401  | -2.268842 | 4.973126  |

|   |           |           |           |
|---|-----------|-----------|-----------|
| C | 0.444331  | -1.456066 | 4.055419  |
| C | -0.671127 | -1.942529 | 3.351412  |
| C | -1.099816 | -3.253978 | 3.587155  |
| C | -0.431451 | -4.065792 | 4.504186  |
| H | 1.197836  | -4.210866 | 5.910840  |
| H | 1.968545  | -1.876066 | 5.509957  |
| H | 0.790784  | -0.440881 | 3.889826  |
| H | -1.946550 | -3.647961 | 3.032760  |
| H | -0.775070 | -5.082972 | 4.669686  |
| C | 2.893931  | 2.018545  | 2.396627  |
| C | 2.317676  | 3.326825  | 2.947901  |
| N | 3.927810  | 2.109144  | 1.517189  |
| C | 4.388200  | 0.964835  | 0.811205  |
| C | 5.686878  | 0.654777  | 0.621390  |
| C | 3.294392  | 0.186402  | 0.128936  |
| O | 2.459722  | 0.750356  | -0.578187 |
| N | 3.277015  | -1.157718 | 0.386376  |
| C | 2.245842  | -2.057529 | -0.026634 |
| C | 2.464823  | -3.137252 | -0.811349 |
| C | 3.683631  | -3.563362 | -1.490778 |
| N | 1.037095  | 3.558883  | 2.286722  |
| C | 1.068164  | 3.755790  | 0.927442  |
| C | -0.204094 | 3.305676  | 0.179771  |
| N | -0.232733 | 1.845433  | 0.310541  |
| C | -0.967195 | 1.221733  | 1.281253  |
| O | -1.798789 | 1.818788  | 1.975901  |
| C | -0.173362 | 3.727134  | -1.292300 |
| O | 2.080920  | 4.142374  | 0.355631  |
| O | 2.380004  | 0.934880  | 2.697266  |
| C | 6.903640  | 1.313788  | 1.100026  |
| C | -0.666939 | 5.130200  | -1.580907 |
| C | 4.741309  | -2.694395 | -1.830624 |
| C | 5.861881  | -3.174304 | -2.501977 |
| C | 5.957981  | -4.528530 | -2.838977 |
| C | 4.912583  | -5.399219 | -2.521475 |
| C | 3.781508  | -4.918058 | -1.867315 |
| C | 6.936535  | 2.236315  | 2.165846  |
| C | 8.139874  | 2.810248  | 2.566656  |
| C | 9.332766  | 2.484331  | 1.914426  |
| C | 9.318262  | 1.565324  | 0.862847  |
| C | 8.117743  | 0.982091  | 0.466530  |
| C | -1.281062 | 5.391310  | -2.815829 |
| C | -1.749501 | 6.666427  | -3.133601 |
| C | -1.612447 | 7.709918  | -2.215486 |
| C | -0.999487 | 7.464849  | -0.985840 |
| C | -0.528081 | 6.187769  | -0.673012 |
| H | 2.974911  | 4.182003  | 2.777009  |
| H | 2.150346  | 3.206049  | 4.019616  |
| H | 4.163722  | 3.029511  | 1.159232  |
| H | 5.867028  | -0.198767 | -0.031478 |
| H | 3.967824  | -1.508775 | 1.039172  |
| H | 1.601836  | -3.785550 | -0.943381 |
| H | 0.225673  | 3.083381  | 2.668938  |
| H | 0.511810  | 1.332015  | -0.153911 |
| H | 4.661799  | -1.638150 | -1.604647 |
| H | 6.661750  | -2.490272 | -2.771475 |
| H | 6.837645  | -4.899273 | -3.357117 |
| H | 4.975949  | -6.449252 | -2.791581 |
| H | 2.960191  | -5.590440 | -1.636595 |
| H | 6.024486  | 2.482166  | 2.695993  |
| H | 8.148830  | 3.512775  | 3.395074  |
| H | 10.267622 | 2.938947  | 2.228897  |

|   |           |           |           |
|---|-----------|-----------|-----------|
| H | 10.241330 | 1.300248  | 0.355790  |
| H | 8.112995  | 0.263462  | -0.349728 |
| H | -1.392365 | 4.580316  | -3.532968 |
| H | -2.223554 | 6.844010  | -4.095348 |
| H | -1.978338 | 8.703894  | -2.456694 |
| H | -0.883850 | 8.270221  | -0.265571 |
| H | -0.044625 | 6.027271  | 0.285659  |
| H | -0.775697 | 3.010525  | -1.853718 |
| H | 0.855299  | 3.614858  | -1.653349 |
| H | -1.100609 | 3.679555  | 0.680889  |
| C | -3.500404 | -1.904796 | -2.909516 |
| C | -4.753047 | -1.142610 | -2.438491 |
| H | -5.281416 | -2.549341 | -0.858048 |
| H | -6.240408 | -1.054971 | -0.860937 |
| H | -4.616040 | -0.060597 | -2.544998 |
| H | -5.567867 | -1.411416 | -3.121612 |
| H | -3.367217 | -1.781406 | -3.990200 |
| H | -3.638586 | -2.978132 | -2.735360 |

Sum of electronic and zero-point energy: -3954.709895  
Sum of electronic and thermal free energies: -3954.819637  
Frequency: -407.5109

**Supplementary Table 28. O1R2S<sup>TS</sup> representative 2**

|    |           |           |           |
|----|-----------|-----------|-----------|
| C  | -3.949602 | 1.939958  | -0.142670 |
| P  | -4.103232 | 0.307347  | 0.713089  |
| P  | -2.026312 | -0.399939 | -1.848446 |
| C  | -8.142563 | -1.141640 | -1.046570 |
| C  | -6.996904 | -1.908699 | -1.253942 |
| C  | -5.776929 | -1.511215 | -0.701735 |
| C  | -5.690773 | -0.337419 | 0.053493  |
| C  | -6.852975 | 0.428256  | 0.266459  |
| C  | -8.069603 | 0.025960  | -0.279374 |
| H  | -4.894148 | -2.113672 | -0.866386 |
| H  | -6.812244 | 1.327901  | 0.874664  |
| C  | -5.006715 | 1.186198  | 5.166173  |
| C  | -5.471933 | 0.014298  | 4.561512  |
| C  | -5.214098 | -0.226095 | 3.213636  |
| C  | -4.488915 | 0.708404  | 2.455522  |
| C  | -4.016106 | 1.880006  | 3.066470  |
| C  | -4.280956 | 2.114046  | 4.418560  |
| H  | -5.585057 | -1.134538 | 2.747366  |
| H  | -3.412581 | 2.589711  | 2.513331  |
| C  | -4.775432 | -3.090127 | -4.449057 |
| C  | -4.007747 | -3.632787 | -3.414492 |
| C  | -3.193239 | -2.806852 | -2.641418 |
| C  | -3.123432 | -1.427714 | -2.902274 |
| C  | -3.883627 | -0.894830 | -3.952149 |
| C  | -4.711725 | -1.721758 | -4.714763 |
| H  | -2.631710 | -3.228461 | -1.812433 |
| H  | -3.845794 | 0.164281  | -4.184926 |
| C  | 2.124580  | -1.020465 | -3.851182 |
| C  | 1.403265  | -2.103448 | -3.344066 |
| C  | 0.163105  | -1.900179 | -2.741869 |
| C  | -0.377802 | -0.607901 | -2.640792 |
| C  | 0.351216  | 0.472674  | -3.160402 |
| C  | 1.595199  | 0.265781  | -3.757539 |
| H  | -0.375569 | -2.748529 | -2.337067 |
| H  | -0.035095 | 1.481661  | -3.109332 |
| H  | -5.208732 | 1.372288  | 6.217073  |
| H  | -9.091898 | -1.450992 | -1.474510 |
| H  | 3.092600  | -1.179416 | -4.318191 |
| H  | -5.418672 | -3.731398 | -5.044770 |
| H  | -8.961464 | 0.620646  | -0.104017 |
| H  | -7.040351 | -2.816106 | -1.848863 |
| H  | -3.912564 | 3.023147  | 4.885051  |
| H  | -6.037852 | -0.710710 | 5.139316  |
| H  | -5.304978 | -1.293526 | -5.517552 |
| H  | -4.051353 | -4.697361 | -3.202387 |
| H  | 2.149237  | 1.115984  | -4.144441 |
| H  | 1.809448  | -3.108939 | -3.406249 |
| Rh | -2.202709 | -0.945159 | 0.482959  |
| O  | -0.456424 | -2.257087 | 0.215924  |
| C  | 0.652954  | -1.715520 | 0.472241  |
| N  | 0.725064  | -0.504276 | 1.037220  |
| C  | -0.443569 | 0.232979  | 1.409626  |
| C  | -1.192179 | -0.253685 | 2.514304  |
| H  | 1.620388  | -0.154201 | 1.382205  |
| H  | -3.207647 | -2.106991 | 0.163629  |
| H  | -2.431543 | -1.348236 | 2.045757  |
| H  | -1.891959 | 0.459652  | 2.942471  |
| C  | 0.668339  | -2.852835 | 5.404014  |
| C  | -0.525290 | -3.254593 | 4.802434  |

|   |           |           |           |
|---|-----------|-----------|-----------|
| C | -1.138012 | -2.442968 | 3.846031  |
| C | -0.566855 | -1.219651 | 3.481500  |
| C | 0.637461  | -0.822274 | 4.087350  |
| C | 1.247318  | -1.633993 | 5.042767  |
| H | 1.146146  | -3.486355 | 6.145994  |
| H | -0.980550 | -4.203569 | 5.071358  |
| H | -2.054211 | -2.770008 | 3.362711  |
| H | 1.103501  | 0.116472  | 3.803762  |
| H | 2.178720  | -1.313123 | 5.500919  |
| C | 3.696627  | 1.691634  | 1.817964  |
| C | 3.504376  | 3.163114  | 2.193918  |
| N | 4.668759  | 1.401180  | 0.911554  |
| C | 4.754618  | 0.119739  | 0.310364  |
| C | 5.908198  | -0.511326 | 0.010780  |
| C | 3.422366  | -0.416467 | -0.144601 |
| O | 2.648967  | 0.280468  | -0.792701 |
| N | 3.143189  | -1.691697 | 0.274692  |
| C | 1.923021  | -2.398522 | 0.113880  |
| C | 1.894849  | -3.702744 | -0.238610 |
| C | 3.011758  | -4.527140 | -0.699283 |
| N | 2.234726  | 3.599166  | 1.623045  |
| C | 2.128159  | 3.594644  | 0.253362  |
| C | 0.691221  | 3.429575  | -0.273312 |
| N | 0.341545  | 2.021707  | -0.036206 |
| C | -0.470543 | 1.667252  | 1.013201  |
| O | -1.177146 | 2.495366  | 1.606372  |
| C | 0.585763  | 3.846802  | -1.746816 |
| O | 3.114835  | 3.603289  | -0.472216 |
| O | 2.939171  | 0.831880  | 2.280426  |
| C | 7.295931  | -0.122933 | 0.271470  |
| C | 0.706393  | 5.346930  | -1.918164 |
| C | 4.090510  | -3.999728 | -1.440837 |
| C | 5.115880  | -4.830190 | -1.885019 |
| C | 5.093169  | -6.197558 | -1.591842 |
| C | 4.023492  | -6.735811 | -0.872013 |
| C | 2.985994  | -5.911152 | -0.442382 |
| C | 7.679200  | 0.829053  | 1.238240  |
| C | 9.023056  | 1.136327  | 1.434211  |
| C | 10.012102 | 0.508535  | 0.671357  |
| C | 9.649235  | -0.444718 | -0.282845 |
| C | 8.306868  | -0.761185 | -0.473870 |
| C | 1.932077  | 5.948451  | -2.229697 |
| C | 2.027320  | 7.335362  | -2.358659 |
| C | 0.900409  | 8.138903  | -2.172619 |
| C | -0.325530 | 7.548544  | -1.856453 |
| C | -0.418654 | 6.162040  | -1.731428 |
| H | 4.306028  | 3.804611  | 1.821765  |
| H | 3.452761  | 3.243885  | 3.281411  |
| H | 5.125736  | 2.178272  | 0.446142  |
| H | 5.796989  | -1.434190 | -0.557899 |
| H | 3.868506  | -2.163221 | 0.801818  |
| H | 0.928910  | -4.192406 | -0.147856 |
| H | 1.397859  | 3.382916  | 2.152990  |
| H | 0.974020  | 1.320559  | -0.422872 |
| H | 4.093624  | -2.947376 | -1.703313 |
| H | 5.931045  | -4.413680 | -2.470335 |
| H | 5.897716  | -6.841496 | -1.934770 |
| H | 3.993743  | -7.799202 | -0.653588 |
| H | 2.149529  | -6.334101 | 0.108224  |
| H | 6.926735  | 1.304452  | 1.856281  |
| H | 9.301497  | 1.865396  | 2.189803  |
| H | 11.058402 | 0.755433  | 0.825684  |

|   |           |           |           |
|---|-----------|-----------|-----------|
| H | 10.411558 | -0.943988 | -0.873709 |
| H | 8.030362  | -1.507745 | -1.214774 |
| H | 2.811018  | 5.323711  | -2.352341 |
| H | 2.983749  | 7.788607  | -2.604934 |
| H | 0.975751  | 9.217902  | -2.274790 |
| H | -1.207976 | 8.166242  | -1.713043 |
| H | -1.377197 | 5.704498  | -1.491443 |
| H | -0.389423 | 3.516703  | -2.119000 |
| H | 1.361209  | 3.324347  | -2.315256 |
| H | -0.001896 | 4.022607  | 0.328175  |
| C | -2.472888 | 1.360151  | -2.189478 |
| C | -3.845996 | 1.826147  | -1.673809 |
| H | -4.833723 | 2.527078  | 0.128670  |
| H | -3.070568 | 2.444345  | 0.271090  |
| H | -4.023625 | 2.825070  | -2.089748 |
| H | -4.647691 | 1.187877  | -2.062887 |
| H | -1.689350 | 1.942252  | -1.695240 |
| H | -2.385095 | 1.548276  | -3.264952 |

Sum of electronic and zero-point energy: -3954.712898  
Sum of electronic and thermal free energies: -3954.823304  
Frequency: -670.9373

**Supplementary Table 29. O1R2S<sup>TS</sup> representative 3**

|    |           |           |           |
|----|-----------|-----------|-----------|
| C  | 4.825922  | 2.613331  | -0.911010 |
| P  | 4.117820  | 1.012067  | -0.300012 |
| P  | 1.347808  | 2.819259  | -1.230647 |
| C  | 6.647426  | -0.548942 | 3.243242  |
| C  | 6.015121  | -1.441263 | 2.373998  |
| C  | 5.299580  | -0.961245 | 1.278449  |
| C  | 5.205793  | 0.420575  | 1.044290  |
| C  | 5.837230  | 1.311944  | 1.921800  |
| C  | 6.560610  | 0.825897  | 3.012125  |
| H  | 4.830348  | -1.668037 | 0.601035  |
| H  | 5.761273  | 2.384568  | 1.770853  |
| C  | 5.153655  | -1.444908 | -4.081048 |
| C  | 6.133065  | -1.223773 | -3.105157 |
| C  | 5.812792  | -0.541584 | -1.932119 |
| C  | 4.501408  | -0.075079 | -1.725387 |
| C  | 3.528084  | -0.294033 | -2.705653 |
| C  | 3.852977  | -0.982057 | -3.877595 |
| H  | 6.578925  | -0.377810 | -1.180414 |
| H  | 2.511202  | 0.039978  | -2.552132 |
| C  | -1.094761 | 6.405986  | 0.425482  |
| C  | -0.114741 | 5.789024  | 1.209140  |
| C  | 0.576314  | 4.680048  | 0.721769  |
| C  | 0.301990  | 4.180650  | -0.562431 |
| C  | -0.686979 | 4.801164  | -1.340367 |
| C  | -1.384657 | 5.904559  | -0.844220 |
| H  | 1.320020  | 4.192728  | 1.343042  |
| H  | -0.920146 | 4.426075  | -2.331192 |
| C  | -1.029374 | 0.849734  | -4.664673 |
| C  | -1.628122 | 1.082842  | -3.423242 |
| C  | -0.910982 | 1.718598  | -2.413452 |
| C  | 0.410376  | 2.142026  | -2.638849 |
| C  | 0.999712  | 1.918518  | -3.890188 |
| C  | 0.280682  | 1.271001  | -4.897011 |
| H  | -1.404498 | 1.900892  | -1.463949 |
| H  | 2.019249  | 2.234558  | -4.089047 |
| H  | 5.408046  | -1.978821 | -4.992339 |
| H  | 7.205782  | -0.921973 | 4.096888  |
| H  | -1.585091 | 0.348080  | -5.452057 |
| H  | -1.630848 | 7.271789  | 0.804699  |
| H  | 7.052641  | 1.523242  | 3.683923  |
| H  | 6.077049  | -2.512625 | 2.543517  |
| H  | 3.080498  | -1.152031 | -4.621980 |
| H  | 7.146495  | -1.583559 | -3.258634 |
| H  | -2.150524 | 6.373205  | -1.455273 |
| H  | 0.110090  | 6.168599  | 2.202095  |
| H  | 0.745544  | 1.102254  | -5.864537 |
| H  | -2.651141 | 0.780064  | -3.223059 |
| Rh | 1.977803  | 1.263484  | 0.469942  |
| O  | 0.065466  | 1.807944  | 1.381240  |
| C  | -0.896693 | 1.028051  | 1.142855  |
| N  | -0.661613 | -0.207093 | 0.655105  |
| C  | 0.639262  | -0.624397 | 0.207282  |
| C  | 1.638038  | -0.949802 | 1.180975  |
| H  | -1.473843 | -0.755405 | 0.394954  |
| H  | 2.722446  | 2.489818  | 1.150647  |
| H  | 2.466181  | 0.412814  | 1.769117  |
| H  | 2.473246  | -1.502697 | 0.756420  |
| C  | 0.578561  | -2.455075 | 5.070793  |
| C  | 1.424069  | -3.169453 | 4.219009  |



|   |           |           |           |
|---|-----------|-----------|-----------|
| C | 1.801963  | -2.625963 | 2.990393  |
| C | 1.323482  | -1.368637 | 2.583880  |
| C | 0.518895  | -0.634288 | 3.468733  |
| C | 0.143689  | -1.180047 | 4.696998  |
| H | 0.282981  | -2.874685 | 6.028027  |
| H | 1.798493  | -4.146737 | 4.511176  |
| H | 2.458570  | -3.186481 | 2.332781  |
| H | 0.229953  | 0.378295  | 3.220129  |
| H | -0.480375 | -0.599163 | 5.370283  |
| C | -4.272650 | -2.352966 | 1.736880  |
| C | -3.574205 | -3.672488 | 2.100310  |
| N | -4.407603 | -2.150898 | 0.398317  |
| C | -4.773176 | -0.941705 | -0.272573 |
| C | -5.713460 | -0.916251 | -1.242776 |
| C | -3.912697 | 0.283630  | -0.100639 |
| O | -3.779917 | 1.119373  | -0.988226 |
| N | -3.240362 | 0.366896  | 1.104063  |
| C | -2.301741 | 1.404221  | 1.365474  |
| C | -2.607052 | 2.673818  | 1.725932  |
| C | -3.901634 | 3.294974  | 1.962371  |
| N | -2.157786 | -3.581738 | 1.741395  |
| C | -1.747767 | -3.795566 | 0.462270  |
| C | -0.275142 | -3.506037 | 0.166659  |
| N | -0.232005 | -2.580109 | -0.959586 |
| C | 0.470470  | -1.400100 | -1.090381 |
| O | 0.760204  | -0.985563 | -2.200772 |
| C | 0.484745  | -4.821985 | -0.148764 |
| O | -2.508020 | -4.170505 | -0.431820 |
| O | -4.562588 | -1.523447 | 2.602174  |
| C | -6.636755 | -1.950320 | -1.701155 |
| C | 1.985535  | -4.634171 | -0.213163 |
| C | -5.119737 | 2.594089  | 2.105306  |
| C | -6.305844 | 3.284996  | 2.329156  |
| C | -6.310960 | 4.681418  | 2.411892  |
| C | -5.113718 | 5.389060  | 2.282622  |
| C | -3.922876 | 4.701939  | 2.069522  |
| C | -6.969545 | -3.107422 | -0.965458 |
| C | -7.865060 | -4.040322 | -1.480148 |
| C | -8.443766 | -3.847736 | -2.738317 |
| C | -8.134559 | -2.702045 | -3.475329 |
| C | -7.249581 | -1.760770 | -2.957281 |
| C | 2.593883  | -3.901053 | -1.244713 |
| C | 3.974339  | -3.691238 | -1.253124 |
| C | 4.774043  | -4.222077 | -0.237563 |
| C | 4.184461  | -4.968942 | 0.785015  |
| C | 2.802275  | -5.170810 | 0.793024  |
| H | -4.007045 | -4.525096 | 1.569834  |
| H | -3.667328 | -3.821185 | 3.175960  |
| H | -4.119599 | -2.923595 | -0.203339 |
| H | -5.753352 | 0.022108  | -1.791370 |
| H | -3.627693 | -0.157618 | 1.892006  |
| H | -1.748213 | 3.333640  | 1.829075  |
| H | -1.521144 | -3.161382 | 2.408125  |
| H | -0.517454 | -2.977142 | -1.849693 |
| H | -5.143191 | 1.513307  | 2.062151  |
| H | -7.233117 | 2.731173  | 2.443462  |
| H | -7.242818 | 5.212666  | 2.583550  |
| H | -5.108790 | 6.472943  | 2.353189  |
| H | -2.991391 | 5.250361  | 1.968064  |
| H | -6.550806 | -3.258645 | 0.021803  |
| H | -8.117863 | -4.920362 | -0.895614 |
| H | -9.138538 | -4.581621 | -3.136465 |

|   |           |           |           |
|---|-----------|-----------|-----------|
| H | -8.588441 | -2.539233 | -4.448504 |
| H | -7.018398 | -0.865845 | -3.529646 |
| H | 1.997651  | -3.488639 | -2.052077 |
| H | 4.422446  | -3.120671 | -2.058602 |
| H | 5.848772  | -4.062720 | -0.251509 |
| H | 4.797434  | -5.402139 | 1.570765  |
| H | 2.350102  | -5.753274 | 1.592734  |
| H | 0.084123  | -5.221936 | -1.088365 |
| H | 0.235733  | -5.551873 | 0.630518  |
| H | 0.191478  | -3.026059 | 1.025447  |
| C | 2.758974  | 3.828415  | -1.916705 |
| C | 4.116367  | 3.151902  | -2.169886 |
| H | 4.776416  | 3.348444  | -0.101295 |
| H | 5.881221  | 2.420216  | -1.134724 |
| H | 4.028701  | 2.355993  | -2.917101 |
| H | 4.772710  | 3.909007  | -2.615866 |
| H | 2.398232  | 4.307184  | -2.834491 |
| H | 2.891149  | 4.629397  | -1.179968 |

Sum of electronic and zero-point energy: -3954.689797  
Sum of electronic and thermal free energies: -3954.79828  
Frequency: -639.7879

**Supplementary Table 30. O1R2S<sup>TS</sup> representative 4**

|    |           |           |           |
|----|-----------|-----------|-----------|
| C  | -4.321455 | 0.630593  | -1.921967 |
| P  | -4.040656 | 0.551597  | -0.089738 |
| P  | -2.469062 | -2.188005 | -1.264861 |
| C  | -8.219395 | -0.943171 | 1.236888  |
| C  | -7.128026 | -1.810654 | 1.292642  |
| C  | -5.853366 | -1.359570 | 0.943742  |
| C  | -5.664185 | -0.035850 | 0.525790  |
| C  | -6.768400 | 0.832847  | 0.467168  |
| C  | -8.036957 | 0.381021  | 0.826764  |
| H  | -5.011552 | -2.038401 | 0.999045  |
| H  | -6.635143 | 1.864993  | 0.154617  |
| C  | -3.436888 | 4.882973  | 1.398312  |
| C  | -3.254017 | 4.592602  | 0.046340  |
| C  | -3.499208 | 3.304552  | -0.432861 |
| C  | -3.929253 | 2.296605  | 0.441156  |
| C  | -4.114408 | 2.596276  | 1.801802  |
| C  | -3.872980 | 3.884175  | 2.275633  |
| H  | -3.330996 | 3.096552  | -1.483660 |
| H  | -4.438754 | 1.818559  | 2.487576  |
| C  | -5.121694 | -5.552748 | 0.509870  |
| C  | -3.998514 | -5.078041 | 1.195461  |
| C  | -3.205255 | -4.080456 | 0.631940  |
| C  | -3.518474 | -3.552262 | -0.634583 |
| C  | -4.632669 | -4.049185 | -1.323731 |
| C  | -5.434480 | -5.039388 | -0.749031 |
| H  | -2.345826 | -3.697633 | 1.175672  |
| H  | -4.894932 | -3.669126 | -2.305372 |
| C  | 1.489549  | -4.174746 | -2.662546 |
| C  | 1.272569  | -2.808056 | -2.847791 |
| C  | 0.061928  | -2.230077 | -2.466402 |
| C  | -0.943403 | -3.013122 | -1.872754 |
| C  | -0.729309 | -4.391675 | -1.711739 |
| C  | 0.477791  | -4.966172 | -2.116511 |
| H  | -0.098162 | -1.168128 | -2.608942 |
| H  | -1.497419 | -5.019080 | -1.272726 |
| H  | -3.237578 | 5.885608  | 1.764663  |
| H  | -9.209422 | -1.293560 | 1.514683  |
| H  | 2.444324  | -4.614907 | -2.932205 |
| H  | -5.746415 | -6.321917 | 0.954988  |
| H  | -8.882292 | 1.062112  | 0.788630  |
| H  | -7.258985 | -2.841468 | 1.608585  |
| H  | -4.020272 | 4.106783  | 3.328539  |
| H  | -2.914994 | 5.362256  | -0.635759 |
| H  | -6.302367 | -5.407334 | -1.288720 |
| H  | -3.746337 | -5.478433 | 2.173284  |
| H  | 0.630905  | -6.034401 | -1.991063 |
| H  | 2.057161  | -2.185834 | -3.267497 |
| Rh | -2.150617 | -0.575799 | 0.484028  |
| O  | -0.431827 | -1.787923 | 1.013532  |
| C  | 0.657825  | -1.401233 | 0.509121  |
| N  | 0.742636  | -0.229952 | -0.156447 |
| C  | -0.338800 | 0.700942  | -0.214246 |
| C  | -0.772986 | 1.345041  | 0.982000  |
| H  | 1.570852  | -0.025347 | -0.711880 |
| H  | -3.103108 | -1.412859 | 1.409768  |
| H  | -1.954778 | 0.423802  | 1.783910  |
| H  | -1.432946 | 2.184762  | 0.785830  |
| C  | 1.967618  | 2.251022  | 4.159984  |
| C  | 1.219200  | 3.247672  | 3.531832  |

|   |           |           |           |
|---|-----------|-----------|-----------|
| C | 0.275213  | 2.907651  | 2.562238  |
| C | 0.085886  | 1.566629  | 2.180009  |
| C | 0.786278  | 0.567336  | 2.873918  |
| C | 1.724110  | 0.911712  | 3.848587  |
| H | 2.716220  | 2.513725  | 4.900181  |
| H | 1.363297  | 4.290095  | 3.802102  |
| H | -0.323278 | 3.687385  | 2.094821  |
| H | 0.555614  | -0.474918 | 2.697333  |
| H | 2.257333  | 0.125837  | 4.376912  |
| C | 4.681500  | 1.645767  | 1.168467  |
| C | 4.460856  | 2.215653  | -0.231840 |
| N | 5.097461  | 0.337742  | 1.251626  |
| C | 5.281052  | -0.580801 | 0.168804  |
| C | 6.356434  | -0.589640 | -0.649932 |
| C | 4.170169  | -1.555916 | -0.104596 |
| O | 4.227211  | -2.417077 | -0.970251 |
| N | 3.077801  | -1.399176 | 0.731707  |
| C | 1.900242  | -2.177556 | 0.694643  |
| C | 1.808324  | -3.525080 | 0.797685  |
| C | 2.816714  | -4.546663 | 1.037678  |
| N | 3.193734  | 2.926848  | -0.269056 |
| C | 2.162078  | 2.492818  | -1.033987 |
| C | 0.875234  | 3.346713  | -0.946184 |
| N | -0.234340 | 2.706353  | -1.642418 |
| C | -0.568827 | 1.371440  | -1.553155 |
| O | -1.081630 | 0.804009  | -2.516780 |
| C | 1.138659  | 4.745593  | -1.557361 |
| O | 2.239981  | 1.508102  | -1.772191 |
| O | 4.492419  | 2.335907  | 2.159978  |
| C | 7.552136  | 0.246490  | -0.679363 |
| C | 0.054511  | 5.767699  | -1.296158 |
| C | 4.109419  | -4.291643 | 1.538612  |
| C | 4.997510  | -5.335708 | 1.773558  |
| C | 4.625336  | -6.656381 | 1.503430  |
| C | 3.345271  | -6.929373 | 1.015362  |
| C | 2.450117  | -5.886692 | 0.795906  |
| C | 7.951074  | 1.125447  | 0.351744  |
| C | 9.107091  | 1.889045  | 0.221509  |
| C | 9.889705  | 1.800888  | -0.934552 |
| C | 9.515252  | 0.930711  | -1.960574 |
| C | 8.364195  | 0.158594  | -1.829836 |
| C | -0.771954 | 6.230218  | -2.326380 |
| C | -1.715072 | 7.234587  | -2.089071 |
| C | -1.843556 | 7.786756  | -0.812675 |
| C | -1.032390 | 7.321215  | 0.226953  |
| C | -0.094406 | 6.318087  | -0.014924 |
| H | 4.440066  | 1.456911  | -1.011074 |
| H | 5.289166  | 2.902854  | -0.440767 |
| H | 5.268509  | 0.020994  | 2.202154  |
| H | 6.285274  | -1.331955 | -1.442670 |
| H | 3.060172  | -0.580947 | 1.329066  |
| H | 0.801257  | -3.903156 | 0.649948  |
| H | 3.026768  | 3.585902  | 0.482668  |
| H | -0.391154 | 3.047174  | -2.586033 |
| H | 4.407928  | -3.277564 | 1.771107  |
| H | 5.987186  | -5.120689 | 2.166439  |
| H | 5.326969  | -7.466851 | 1.678790  |
| H | 3.044509  | -7.953268 | 0.812904  |
| H | 1.452012  | -6.099807 | 0.423661  |
| H | 7.371140  | 1.198317  | 1.262717  |
| H | 9.402785  | 2.554085  | 1.027838  |
| H | 10.789215 | 2.402155  | -1.030149 |

|   |           |           |           |
|---|-----------|-----------|-----------|
| H | 10.121714 | 0.849390  | -2.857723 |
| H | 8.078885  | -0.521998 | -2.627932 |
| H | -0.659831 | 5.823526  | -3.329112 |
| H | -2.339696 | 7.591424  | -2.902995 |
| H | -2.567265 | 8.575478  | -0.629152 |
| H | -1.121408 | 7.749946  | 1.221328  |
| H | 0.547314  | 5.974715  | 0.794634  |
| H | 1.306855  | 4.625141  | -2.635374 |
| H | 2.083735  | 5.115530  | -1.146441 |
| H | 0.627023  | 3.472652  | 0.110627  |
| C | -3.281153 | -1.568795 | -2.804532 |
| C | -4.559462 | -0.738729 | -2.586796 |
| H | -5.194269 | 1.276527  | -2.071950 |
| H | -3.449911 | 1.109023  | -2.377154 |
| H | -4.999921 | -0.551437 | -3.573345 |
| H | -5.308812 | -1.308538 | -2.024213 |
| H | -2.520773 | -0.956121 | -3.296194 |
| H | -3.481768 | -2.426243 | -3.456193 |

Sum of electronic and zero-point energy: -3954.698835  
Sum of electronic and thermal free energies: -3954.8088  
Frequency: -639.0016

**Supplementary Table 31. O1R2S<sup>TS</sup> representative 5**

|    |           |           |           |
|----|-----------|-----------|-----------|
| C  | 4.739652  | 1.052686  | -1.369163 |
| P  | 4.077175  | 0.758201  | 0.336664  |
| P  | 1.720832  | 2.698553  | -1.119627 |
| C  | 6.943115  | 3.569941  | 2.649904  |
| C  | 5.631720  | 3.973353  | 2.394127  |
| C  | 4.744329  | 3.110896  | 1.748048  |
| C  | 5.167820  | 1.837421  | 1.341196  |
| C  | 6.493444  | 1.441712  | 1.589980  |
| C  | 7.371646  | 2.301639  | 2.248901  |
| H  | 3.724974  | 3.431746  | 1.564941  |
| H  | 6.837457  | 0.458272  | 1.281996  |
| C  | 4.818037  | -3.664603 | 1.428567  |
| C  | 4.701899  | -3.297094 | 0.087343  |
| C  | 4.569759  | -1.951259 | -0.260619 |
| C  | 4.544555  | -0.963003 | 0.735659  |
| C  | 4.660861  | -1.341009 | 2.083933  |
| C  | 4.804288  | -2.684560 | 2.426107  |
| H  | 4.449859  | -1.688900 | -1.306105 |
| H  | 4.628265  | -0.585011 | 2.863281  |
| C  | 2.068577  | 6.745385  | 1.118580  |
| C  | 1.207883  | 5.740160  | 1.570372  |
| C  | 1.107767  | 4.537974  | 0.871998  |
| C  | 1.856414  | 4.333834  | -0.302521 |
| C  | 2.705072  | 5.352733  | -0.756944 |
| C  | 2.814896  | 6.549508  | -0.043942 |
| H  | 0.454983  | 3.749609  | 1.236463  |
| H  | 3.294313  | 5.226083  | -1.658870 |
| C  | -2.138141 | 2.888627  | -3.721234 |
| C  | -1.204999 | 1.860686  | -3.899009 |
| C  | -0.061850 | 1.800829  | -3.099134 |
| C  | 0.178249  | 2.787691  | -2.125833 |
| C  | -0.766139 | 3.810486  | -1.948063 |
| C  | -1.916872 | 3.856697  | -2.738604 |
| H  | 0.635543  | 0.981084  | -3.230074 |
| H  | -0.606831 | 4.577695  | -1.198203 |
| H  | 4.910412  | -4.713655 | 1.691752  |
| H  | 7.629654  | 4.238824  | 3.161000  |
| H  | -3.034299 | 2.921442  | -4.333833 |
| H  | 2.155667  | 7.676737  | 1.670790  |
| H  | 8.389899  | 1.980739  | 2.449068  |
| H  | 5.290180  | 4.958172  | 2.699604  |
| H  | 4.893814  | -2.966510 | 3.471185  |
| H  | 4.696318  | -4.056666 | -0.686325 |
| H  | 3.484029  | 7.327225  | -0.400778 |
| H  | 0.622337  | 5.888311  | 2.473271  |
| H  | -2.637009 | 4.655777  | -2.587584 |
| H  | -1.372527 | 1.094744  | -4.651183 |
| Rh | 1.828713  | 0.992523  | 0.546833  |
| O  | -0.332776 | 1.385833  | 0.805807  |
| C  | -1.049554 | 0.719278  | 0.008917  |
| N  | -0.548813 | -0.335317 | -0.656783 |
| C  | 0.796642  | -0.788569 | -0.476927 |
| C  | 1.247493  | -1.309007 | 0.778030  |
| H  | -1.109272 | -0.748651 | -1.400919 |
| H  | 2.225607  | 2.063346  | 1.626941  |
| H  | 1.878517  | -0.142078 | 1.742170  |
| H  | 2.182612  | -1.849333 | 0.663658  |
| C  | -1.043942 | -3.212239 | 3.878724  |
| C  | -0.025086 | -3.885212 | 3.202937  |
| C  | 0.713328  | -3.225493 | 2.220781  |

|   |            |           |           |
|---|------------|-----------|-----------|
| C | 0.420411   | -1.892639 | 1.877679  |
| C | -0.586355  | -1.217945 | 2.579187  |
| C | -1.309566  | -1.877476 | 3.571574  |
| H | -1.618819  | -3.720889 | 4.646733  |
| H | 0.211235   | -4.915736 | 3.454073  |
| H | 1.539336   | -3.737967 | 1.731461  |
| H | -0.768885  | -0.169802 | 2.382128  |
| H | -2.089734  | -1.344264 | 4.107054  |
| C | -3.548118  | -2.383806 | 0.376826  |
| C | -3.283794  | -2.968073 | -1.016064 |
| N | -4.300267  | -1.244369 | 0.480221  |
| C | -5.037944  | -0.590099 | -0.540445 |
| C | -6.376248  | -0.410417 | -0.473348 |
| C | -4.310708  | 0.077635  | -1.662563 |
| O | -4.811718  | 0.216807  | -2.769001 |
| N | -3.005050  | 0.517372  | -1.434350 |
| C | -2.466771  | 1.069146  | -0.243068 |
| C | -3.115958  | 1.860090  | 0.640428  |
| C | -4.474320  | 2.398470  | 0.531250  |
| N | -1.951995  | -3.558268 | -1.006987 |
| C | -0.960995  | -3.056421 | -1.782408 |
| C | 0.458937   | -3.557646 | -1.441262 |
| N | 1.464977   | -2.635732 | -1.953433 |
| C | 1.491270   | -1.282499 | -1.739584 |
| O | 2.102551   | -0.541259 | -2.510196 |
| C | 0.684269   | -4.969609 | -2.027090 |
| O | -1.150614  | -2.233489 | -2.681462 |
| O | -3.103677  | -2.952774 | 1.366336  |
| C | -7.321414  | -0.860084 | 0.546609  |
| C | 1.994522   | -5.593134 | -1.598527 |
| C | -4.998662  | 2.864883  | -0.689506 |
| C | -6.300317  | 3.354360  | -0.755596 |
| C | -7.101894  | 3.383608  | 0.390293  |
| C | -6.586425  | 2.940033  | 1.610930  |
| C | -5.277693  | 2.466915  | 1.683696  |
| C | -7.125613  | -1.988356 | 1.371084  |
| C | -8.078961  | -2.343487 | 2.322801  |
| C | -9.240152  | -1.582008 | 2.479663  |
| C | -9.453749  | -0.467427 | 1.663944  |
| C | -8.509845  | -0.117413 | 0.703106  |
| C | 3.061594   | -5.727884 | -2.494056 |
| C | 4.258944   | -6.327755 | -2.093100 |
| C | 4.403096   | -6.797279 | -0.785731 |
| C | 3.345829   | -6.659232 | 0.118890  |
| C | 2.153155   | -6.060268 | -0.285936 |
| H | -3.328888  | -2.244012 | -1.827515 |
| H | -4.044807  | -3.734925 | -1.207346 |
| H | -4.539912  | -1.013772 | 1.440805  |
| H | -6.785404  | 0.231333  | -1.248464 |
| H | -2.600225  | 0.884792  | -2.293971 |
| H | -2.569644  | 2.088985  | 1.552574  |
| H | -1.708062  | -4.020065 | -0.135709 |
| H | 1.888766   | -2.890485 | -2.839614 |
| H | -4.380521  | 2.846312  | -1.580268 |
| H | -6.690933  | 3.714070  | -1.703150 |
| H | -8.118874  | 3.761450  | 0.334044  |
| H | -7.202282  | 2.965536  | 2.504987  |
| H | -4.876023  | 2.128158  | 2.635810  |
| H | -6.247484  | -2.611486 | 1.247211  |
| H | -7.917485  | -3.222473 | 2.940263  |
| H | -9.978633  | -1.861828 | 3.225428  |
| H | -10.359131 | 0.122751  | 1.772636  |
| H | -8.674680  | 0.751141  | 0.071665  |

|   |           |           |           |
|---|-----------|-----------|-----------|
| H | 2.949331  | -5.384469 | -3.520303 |
| H | 5.072734  | -6.436661 | -2.804445 |
| H | 5.328877  | -7.273180 | -0.475590 |
| H | 3.445688  | -7.031423 | 1.134837  |
| H | 1.328953  | -5.969860 | 0.418969  |
| H | 0.618945  | -4.909419 | -3.120736 |
| H | -0.153302 | -5.596681 | -1.701570 |
| H | 0.548151  | -3.619959 | -0.353418 |
| C | 3.029703  | 2.660347  | -2.426122 |
| C | 4.465542  | 2.466807  | -1.910182 |
| H | 5.818927  | 0.873505  | -1.304553 |
| H | 4.302417  | 0.311340  | -2.042294 |
| H | 5.145100  | 2.636194  | -2.753722 |
| H | 4.721787  | 3.223706  | -1.158702 |
| H | 2.762369  | 1.827079  | -3.081084 |
| H | 2.946513  | 3.577479  | -3.018929 |

Sum of electronic and zero-point energy: -3954.700608

Sum of electronic and thermal free energies: -3954.808933

Frequency: -713.3412
